# Supplementary material
Source: Research Square preprint supplement (doi:10.21203/rs.3.rs-8368209/v1)
Supplement: Supplementary file 1 [file 6d5d4c1b073ff07df61b3892.xlsx]

## Sheet: Sheet1
Supplementary Figure 4: List of antibiotic reisance genes foudn in various genomes downloaded from NCBI
Assembly.Accession	Organism.Name	Protein.id	Element.symbol	Element.name	Scope	Type	Subtype	Class	Subclass	Method	Target.length	Reference.sequence.length	X..Coverage.of.reference	X..Identity.to.reference	Alignment.length	Closest.reference.accession	Closest.reference.name	HMM.accession	HMM.description	No.Acc.Occ
GCA_000024005.1	Chitinophaga pinensis DSM 2588	ACU58405.1	blaOXA	class D beta-lactamase	core	AMR	AMR	BETA-LACTAM	BETA-LACTAM	HMM	267	285	86.67	41.18	255	WP_058375744.1	class D beta-lactamase	NF012161.0	class D beta-lactamase	3
GCA_000024005.1	Chitinophaga pinensis DSM 2588	ACU58932.1	bla	class A beta-lactamase, subclass A2	core	AMR	AMR	BETA-LACTAM	BETA-LACTAM	HMM	295	303	96.04	51.2	291	WP_041881964.1	class A beta-lactamase, subclass A2	NF012099.1	class A beta-lactamase, subclass A2	3
GCA_000024005.1	Chitinophaga pinensis DSM 2588	ACU62014.1	bla	subclass B3 metallo-beta-lactamase	core	AMR	AMR	BETA-LACTAM	BETA-LACTAM	HMM	294	289	92.04	60.97	269	WP_041884311.1	subclass B3 metallo-beta-lactamase	NF033105.1	subclass B3 metallo-beta-lactamase	3
GCA_000246855.1	Niastella koreensis GR20-10	AEV99147.1	bla	subclass B3 metallo-beta-lactamase	core	AMR	AMR	BETA-LACTAM	BETA-LACTAM	HMM	287	289	93.77	62.73	271	WP_041884311.1	subclass B3 metallo-beta-lactamase	NF033105.1	subclass B3 metallo-beta-lactamase	2
GCA_000243115.3	Niabella soli DSM 19437	AHF14245.1	arr	NAD(+)--rifampin ADP-ribosyltransferase	core	AMR	AMR	RIFAMYCIN	RIFAMYCIN	HMM	132	150	82.67	50.81	124	WP_052238312.1	NAD(+)--rifampin ADP-ribosyltransferase	NF033144.1	NAD(+)--rifampin ADP-ribosyltransferase	2
GCA_000243115.3	Niabella soli DSM 19437	AHF14790.1	bla	subclass B3 metallo-beta-lactamase	core	AMR	AMR	BETA-LACTAM	BETA-LACTAM	HMM	287	292	98.63	57.64	288	WP_086979105.1	subclass B3 metallo-beta-lactamase	NF033105.1	subclass B3 metallo-beta-lactamase	1
GCA_001644645.1	Flavisolibacter tropicus	ANE50877.1	arsN2	arsenic resistance N-acetyltransferase ArsN2	plus	STRESS	METAL	ARSENIC	ARSENIC	HMM	146	164	81.1	36.84	133	ABU58394.1	arsenic resistance N-acetyltransferase ArsN2	NF040501.1	arsenic resistance N-acetyltransferase ArsN2	3
GCA_001644645.1	Flavisolibacter tropicus	ANE51710.1	arr	NAD(+)--rifampin ADP-ribosyltransferase	core	AMR	AMR	RIFAMYCIN	RIFAMYCIN	HMM	141	150	82.67	53.23	124	WP_063842214.1	NAD(+)--rifampin ADP-ribosyltransferase	NF033144.1	NAD(+)--rifampin ADP-ribosyltransferase	3
GCA_001654455.1	Niabella ginsenosidivorans	ANH80217.1	bla	class A beta-lactamase	core	AMR	AMR	BETA-LACTAM	BETA-LACTAM	HMM	283	319	84.95	48.16	272	WP_063842272.1	class A beta-lactamase	NF033103.1	class A beta-lactamase	3
GCA_001654455.1	Niabella ginsenosidivorans	ANH83852.1	bla	subclass B3 metallo-beta-lactamase	core	AMR	AMR	BETA-LACTAM	BETA-LACTAM	HMM	289	289	96.54	63.08	279	WP_041884311.1	subclass B3 metallo-beta-lactamase	NF033105.1	subclass B3 metallo-beta-lactamase	1
GCA_001654455.1	Niabella ginsenosidivorans	ANH83944.1	arr	NAD(+)--rifampin ADP-ribosyltransferase	core	AMR	AMR	RIFAMYCIN	RIFAMYCIN	HMM	137	150	83.33	54.4	125	WP_000237816.1	NAD(+)--rifampin ADP-ribosyltransferase	NF033144.1	NAD(+)--rifampin ADP-ribosyltransferase	2
GCA_002290065.1	Chitinophaga sp. MD30	ASZ10375.1	aph(3'')	APH(3'') family aminoglycoside O-phosphotransferase	core	AMR	AMR	AMINOGLYCOSIDE	STREPTOMYCIN	HMM	267	267	94.38	53.97	252	WP_001082319.1	APH(3'') family aminoglycoside O-phosphotransferase	NF032896.1	APH(3'') family aminoglycoside O-phosphotransferase	2
GCA_002290065.1	Chitinophaga sp. MD30	ASZ10527.1	blaOXA	class D beta-lactamase	core	AMR	AMR	BETA-LACTAM	BETA-LACTAM	HMM	268	289	83.04	42.62	244	WP_075071939.1	class D beta-lactamase	NF012161.0	class D beta-lactamase	2
GCA_002290065.1	Chitinophaga sp. MD30	ASZ13276.1	bla	subclass B1 metallo-beta-lactamase	core	AMR	AMR	BETA-LACTAM	BETA-LACTAM	HMM	252	253	98.02	68.15	248	WP_119059468.1	subclass B1 metallo-beta-lactamase	NF033088.2	subclass B1 metallo-beta-lactamase	2
GCA_002557795.1	Chitinophaga caeni	ATL46780.1	blaOXA	class D beta-lactamase	core	AMR	AMR	BETA-LACTAM	BETA-LACTAM	HMM	267	258	96.51	38.13	257	WP_004919358.1	class D beta-lactamase	NF012161.0	class D beta-lactamase	2
GCA_002557795.1	Chitinophaga caeni	ATL48482.1	bla	subclass B1 metallo-beta-lactamase	core	AMR	AMR	BETA-LACTAM	BETA-LACTAM	HMM	243	241	97.93	47.03	236	WP_148044405.1	subclass B1 metallo-beta-lactamase	NF033088.2	subclass B1 metallo-beta-lactamase	2
GCA_003177275.1	Chitinophaga alhagiae	AWO01889.1	bla	class A beta-lactamase, subclass A2	core	AMR	AMR	BETA-LACTAM	BETA-LACTAM	HMM	307	319	88.4	45.23	283	WP_063842272.1	class A beta-lactamase, subclass A2	NF012099.1	class A beta-lactamase, subclass A2	3
GCA_003177275.1	Chitinophaga alhagiae	AWO02277.1	blaOXA	class D beta-lactamase	core	AMR	AMR	BETA-LACTAM	BETA-LACTAM	HMM	267	289	82.35	40.25	241	WP_075071939.1	class D beta-lactamase	NF012161.0	class D beta-lactamase	3
GCA_003555545.1	Paraflavitalea soli	AXY72555.1	arsN2	arsenic resistance N-acetyltransferase ArsN2	plus	STRESS	METAL	ARSENIC	ARSENIC	HMM	144	164	86.59	38.73	142	ABU58394.1	arsenic resistance N-acetyltransferase ArsN2	NF040501.1	arsenic resistance N-acetyltransferase ArsN2	3
GCA_003555545.1	Paraflavitalea soli	AXY76377.1	bla	subclass B1 metallo-beta-lactamase	core	AMR	AMR	BETA-LACTAM	BETA-LACTAM	HMM	252	253	98.02	70.56	248	WP_119059468.1	subclass B1 metallo-beta-lactamase	NF033088.2	subclass B1 metallo-beta-lactamase	1
GCA_003600625.1	Arachidicoccus soli	AYD47691.1	arr	NAD(+)--rifampin ADP-ribosyltransferase	core	AMR	AMR	RIFAMYCIN	RIFAMYCIN	HMM	247	143	82.52	50.85	118	WP_063842202.1	NAD(+)--rifampin ADP-ribosyltransferase	NF033144.1	NAD(+)--rifampin ADP-ribosyltransferase	1
GCA_003600625.1	Arachidicoccus soli	AYD49232.1	bla	BlaB/IND/MUS family subclass B1 metallo-beta-lactamase	core	AMR	AMR	BETA-LACTAM	BETA-LACTAM	HMM	246	248	93.55	50.43	232	WP_012025466.1	BlaB/IND/MUS family subclass B1 metallo-beta-lactamase	NF012146.1	BlaB/IND/MUS family subclass B1 metallo-beta-lactamase	2
GCA_002355595.1	Filimonas lacunae	BAV04771.1	bla	class A beta-lactamase, subclass A2	core	AMR	AMR	BETA-LACTAM	BETA-LACTAM	HMM	296	319	84.95	48.9	272	WP_063842272.1	class A beta-lactamase, subclass A2	NF012099.1	class A beta-lactamase, subclass A2	2
GCA_002355595.1	Filimonas lacunae	BAV06405.1	bla	subclass B3 metallo-beta-lactamase	core	AMR	AMR	BETA-LACTAM	BETA-LACTAM	HMM	291	289	97.58	63.48	282	WP_041884311.1	subclass B3 metallo-beta-lactamase	NF033105.1	subclass B3 metallo-beta-lactamase	2
GCA_002355595.1	Filimonas lacunae	BAV06738.1	arr	NAD(+)--rifampin ADP-ribosyltransferase	core	AMR	AMR	RIFAMYCIN	RIFAMYCIN	HMM	234	143	82.52	58.47	118	WP_063842202.1	NAD(+)--rifampin ADP-ribosyltransferase	NF033144.1	NAD(+)--rifampin ADP-ribosyltransferase	2
GCA_025997995.1	Sediminibacterium sp. TEGAF015	BDQ12043.1	bla	BlaB/IND/MUS family subclass B1 metallo-beta-lactamase	core	AMR	AMR	BETA-LACTAM	BETA-LACTAM	HMM	350	241	97.51	51.06	235	WP_148044405.1	BlaB/IND/MUS family subclass B1 metallo-beta-lactamase	NF012146.1	BlaB/IND/MUS family subclass B1 metallo-beta-lactamase	1
GCA_025997995.1	Sediminibacterium sp. TEGAF015	BDQ12149.1	aac(6')	aminoglycoside 6'-N-acetyltransferase	core	AMR	AMR	AMINOGLYCOSIDE	AMINOGLYCOSIDE	HMM	147	182	78.02	50.7	142	WP_024566461.1	aminoglycoside 6'-N-acetyltransferase	NF043067.1	aminoglycoside 6'-N-acetyltransferase	1
GCA_040362915.1	Sediminibacterium sp. KACHI17	BFG70660.1	aac(6')	aminoglycoside 6'-N-acetyltransferase	core	AMR	AMR	AMINOGLYCOSIDE	AMINOGLYCOSIDE	HMM	147	147	98.64	42.76	145	WP_000405752.1	aminoglycoside 6'-N-acetyltransferase	NF043067.1	aminoglycoside 6'-N-acetyltransferase	1
GCA_040362915.1	Sediminibacterium sp. KACHI17	BFG71265.1	bla	BlaB/IND/MUS family subclass B1 metallo-beta-lactamase	core	AMR	AMR	BETA-LACTAM	BETA-LACTAM	HMM	232	246	88.21	52.53	217	WP_318245543.1	BlaB/IND/MUS family subclass B1 metallo-beta-lactamase	NF012146.1	BlaB/IND/MUS family subclass B1 metallo-beta-lactamase	1
GCA_964033635.1	Chitinophaga sp. MM2321	CAL1519401.1	bla	subclass B3 metallo-beta-lactamase	core	AMR	AMR	BETA-LACTAM	BETA-LACTAM	HMM	300	289	99.65	64.58	288	WP_041884311.1	subclass B3 metallo-beta-lactamase	NF033105.1	subclass B3 metallo-beta-lactamase	3
GCA_964033635.1	Chitinophaga sp. MM2321	CAL1520930.1	blaOXA	class D beta-lactamase	core	AMR	AMR	BETA-LACTAM	BETA-LACTAM	HMM	285	258	96.9	38.76	258	WP_004919358.1	class D beta-lactamase	NF012161.0	class D beta-lactamase	3
GCA_039523775.1	Chitinophaga japonensis	GAA0532509.1	blaOXA	class D beta-lactamase	core	AMR	AMR	BETA-LACTAM	BETA-LACTAM	HMM	267	267	99.63	39.03	269	WP_032492122.1	class D beta-lactamase	NF012161.0	class D beta-lactamase	3
GCA_039523775.1	Chitinophaga japonensis	GAA0534490.1	bla	subclass B1 metallo-beta-lactamase	core	AMR	AMR	BETA-LACTAM	BETA-LACTAM	HMM	267	252	96.03	51.95	256	WP_202272142.1	subclass B1 metallo-beta-lactamase	NF033088.2	subclass B1 metallo-beta-lactamase	2
GCA_039536685.1	Chitinophaga oryziterrae	GAA3943451.1	bla	class A beta-lactamase, subclass A2	core	AMR	AMR	BETA-LACTAM	BETA-LACTAM	HMM	296	303	93.73	54.93	284	WP_041881964.1	class A beta-lactamase, subclass A2	NF012099.1	class A beta-lactamase, subclass A2	2
GCA_039541075.1	Compostibacter hankyongensis	GAA4317553.1	blaOXA	class D beta-lactamase	core	AMR	AMR	BETA-LACTAM	BETA-LACTAM	HMM	273	289	95.85	36.88	282	WP_075071939.1	class D beta-lactamase	NF012161.0	class D beta-lactamase	3
GCA_039541815.1	Flaviaesturariibacter amylovorans	GAA4343865.1	bla	subclass B1 metallo-beta-lactamase	core	AMR	AMR	BETA-LACTAM	BETA-LACTAM	HMM	259	241	100	50.21	241	WP_148044405.1	subclass B1 metallo-beta-lactamase	NF033088.2	subclass B1 metallo-beta-lactamase	3
GCA_039540495.1	Rurimicrobium arvi	GAA4449324.1	bla	class A beta-lactamase	core	AMR	AMR	BETA-LACTAM	BETA-LACTAM	HMM	271	301	84.39	40.16	254	WP_032494759.1	class A beta-lactamase	NF033103.1	class A beta-lactamase	3
GCA_039540495.1	Rurimicrobium arvi	GAA4459099.1	arr	NAD(+)--rifampin ADP-ribosyltransferase	core	AMR	AMR	RIFAMYCIN	RIFAMYCIN	HMM	140	150	80.67	55.37	121	WP_033959319.1	NAD(+)--rifampin ADP-ribosyltransferase	NF033144.1	NAD(+)--rifampin ADP-ribosyltransferase	3
GCA_039540515.1	Nemorincola caseinilytica	GAA4460310.1	bla	subclass B1 metallo-beta-lactamase	core	AMR	AMR	BETA-LACTAM	BETA-LACTAM	HMM	250	247	97.57	41.22	245	WP_013992183.1	subclass B1 metallo-beta-lactamase	NF033088.2	subclass B1 metallo-beta-lactamase	3
GCA_039542825.1	Flavisolibacter ginsenosidimutans	GAA4738952.1	arsN2	arsenic resistance N-acetyltransferase ArsN2	plus	STRESS	METAL	ARSENIC	ARSENIC	HMM	141	144	88.19	41.54	130	KTT96020.1	arsenic resistance N-acetyltransferase ArsN2	NF040501.1	arsenic resistance N-acetyltransferase ArsN2	3
GCA_039542825.1	Flavisolibacter ginsenosidimutans	GAA4740281.1	arsN2	arsenic resistance N-acetyltransferase ArsN2	plus	STRESS	METAL	ARSENIC	ARSENIC	HMM	175	144	82.64	40	120	KTT96020.1	arsenic resistance N-acetyltransferase ArsN2	NF040501.1	arsenic resistance N-acetyltransferase ArsN2	2
GCA_000974785.1	Flavihumibacter petaseus NBRC 106054	GAO41382.1	arr	NAD(+)--rifampin ADP-ribosyltransferase	core	AMR	AMR	RIFAMYCIN	RIFAMYCIN	HMM	162	143	88.11	61.9	126	WP_063842202.1	NAD(+)--rifampin ADP-ribosyltransferase	NF033144.1	NAD(+)--rifampin ADP-ribosyltransferase	2
GCA_000974785.1	Flavihumibacter petaseus NBRC 106054	GAO44533.1	bla	subclass B1 metallo-beta-lactamase	core	AMR	AMR	BETA-LACTAM	BETA-LACTAM	HMM	262	253	99.21	58.57	251	WP_119059468.1	subclass B1 metallo-beta-lactamase	NF033088.2	subclass B1 metallo-beta-lactamase	1
GCA_007991655.1	Segetibacter aerophilus	GEO11082.1	arr	NAD(+)--rifampin ADP-ribosyltransferase	core	AMR	AMR	RIFAMYCIN	RIFAMYCIN	HMM	148	150	91.33	57.66	137	WP_033959319.1	NAD(+)--rifampin ADP-ribosyltransferase	NF033144.1	NAD(+)--rifampin ADP-ribosyltransferase	1
GCA_007992695.1	Chitinophaga terrae (ex Kim and Jung 2007)	GEP88503.1	bla	class A beta-lactamase, subclass A2	core	AMR	AMR	BETA-LACTAM	BETA-LACTAM	HMM	299	301	98.67	46.13	297	WP_032494759.1	class A beta-lactamase, subclass A2	NF012099.1	class A beta-lactamase, subclass A2	3
GCA_007992695.1	Chitinophaga terrae (ex Kim and Jung 2007)	GEP90780.1	aadS	AadS family aminoglycoside 6-adenylyltransferase	core	AMR	AMR	AMINOGLYCOSIDE	STREPTOMYCIN	HMM	296	287	97.56	61.79	280	WP_003013318.1	AadS family aminoglycoside 6-adenylyltransferase	NF033387.1	AadS family aminoglycoside 6-adenylyltransferase	3
GCA_007992695.1	Chitinophaga terrae (ex Kim and Jung 2007)	GEP91646.1	bla	subclass B3 metallo-beta-lactamase	core	AMR	AMR	BETA-LACTAM	BETA-LACTAM	HMM	269	289	91.7	66.42	265	WP_041884311.1	subclass B3 metallo-beta-lactamase	NF033105.1	subclass B3 metallo-beta-lactamase	3
GCA_007992715.1	Chitinophaga cymbidii	GEP95283.1	blaOXA	class D beta-lactamase	core	AMR	AMR	BETA-LACTAM	BETA-LACTAM	HMM	267	289	83.04	42.8	243	WP_075071939.1	class D beta-lactamase	NF012161.0	class D beta-lactamase	2
GCA_007992715.1	Chitinophaga cymbidii	GEP95616.1	bla	class A beta-lactamase, subclass A2	core	AMR	AMR	BETA-LACTAM	BETA-LACTAM	HMM	310	319	95.61	43.14	306	WP_063842272.1	class A beta-lactamase, subclass A2	NF012099.1	class A beta-lactamase, subclass A2	2
GCA_014642875.1	Puia dinghuensis	GGA94024.1	bla	class A beta-lactamase	core	AMR	AMR	BETA-LACTAM	BETA-LACTAM	HMM	298	301	88.7	46.84	269	WP_032494759.1	class A beta-lactamase	NF033103.1	class A beta-lactamase	4
GCA_014642875.1	Puia dinghuensis	GGB10557.1	bla	subclass B3 metallo-beta-lactamase	core	AMR	AMR	BETA-LACTAM	BETA-LACTAM	HMM	298	289	96.89	59.29	280	WP_041884311.1	subclass B3 metallo-beta-lactamase	NF033105.1	subclass B3 metallo-beta-lactamase	4
GCA_014641615.1	Filimonas zeae	GGH70938.1	bla	subclass B3 metallo-beta-lactamase	core	AMR	AMR	BETA-LACTAM	BETA-LACTAM	HMM	295	293	97.61	62.24	286	WP_063842707.1	subclass B3 metallo-beta-lactamase	NF033105.1	subclass B3 metallo-beta-lactamase	4
GCA_003456695.1	Chitinophagaceae bacterium	HAN65730.1	blaOXA	class D beta-lactamase	core	AMR	AMR	BETA-LACTAM	BETA-LACTAM	HMM	274	267	96.25	38.81	268	WP_003235647.1	class D beta-lactamase	NF012161.0	class D beta-lactamase	4
GCA_003455235.1	Chitinophagaceae bacterium	HAO46298.1	arsN2	arsenic resistance N-acetyltransferase ArsN2	plus	STRESS	METAL	ARSENIC	ARSENIC	HMM	149	147	85.03	35.2	125	ABG05788.1	arsenic resistance N-acetyltransferase ArsN2	NF040501.1	arsenic resistance N-acetyltransferase ArsN2	3
GCA_003455235.1	Chitinophagaceae bacterium	HAO47295.1	blaOXA	class D beta-lactamase	core	AMR	AMR	BETA-LACTAM	BETA-LACTAM	HMM	272	268	95.9	38.43	268	WP_003328240.1	class D beta-lactamase	NF012161.0	class D beta-lactamase	3
GCA_003487385.1	Chitinophagaceae bacterium	HAZ93025.1	bla	BlaB/IND/MUS family subclass B1 metallo-beta-lactamase	core	AMR	AMR	BETA-LACTAM	BETA-LACTAM	HMM	264	241	97.93	51.9	237	WP_148044405.1	BlaB/IND/MUS family subclass B1 metallo-beta-lactamase	NF012146.1	BlaB/IND/MUS family subclass B1 metallo-beta-lactamase	3
GCA_003534175.1	Chitinophagaceae bacterium	HCF64394.1	blaOXA	class D beta-lactamase	core	AMR	AMR	BETA-LACTAM	BETA-LACTAM	HMM	272	267	96.63	38.46	260	WP_032492122.1	class D beta-lactamase	NF012161.0	class D beta-lactamase	4
GCA_035695565.1	Puia sp.	HET6254943.1	ampC	class C beta-lactamase	core	AMR	AMR	BETA-LACTAM	BETA-LACTAM	HMM	894	609	57.47	55.14	350	WP_063839877.1	class C beta-lactamase	NF033085.1	class C beta-lactamase	4
GCA_035698135.1	Chitinophagaceae bacterium	HET6722208.1	arr	NAD(+)--rifampin ADP-ribosyltransferase	core	AMR	AMR	RIFAMYCIN	RIFAMYCIN	HMM	247	150	90.67	47.79	136	WP_000237816.1	NAD(+)--rifampin ADP-ribosyltransferase	NF033144.1	NAD(+)--rifampin ADP-ribosyltransferase	4
GCA_035697565.1	Chitinophagaceae bacterium	HET6767641.1	arr	NAD(+)--rifampin ADP-ribosyltransferase	core	AMR	AMR	RIFAMYCIN	RIFAMYCIN	HMM	148	143	90.91	61.54	130	WP_063842202.1	NAD(+)--rifampin ADP-ribosyltransferase	NF033144.1	NAD(+)--rifampin ADP-ribosyltransferase	4
GCA_035697565.1	Chitinophagaceae bacterium	HET6767901.1	arr	NAD(+)--rifampin ADP-ribosyltransferase	core	AMR	AMR	RIFAMYCIN	RIFAMYCIN	HMM	247	150	86	48.48	132	WP_033959319.1	NAD(+)--rifampin ADP-ribosyltransferase	NF033144.1	NAD(+)--rifampin ADP-ribosyltransferase	2
GCA_035697565.1	Chitinophagaceae bacterium	HET6768994.1	arr	NAD(+)--rifampin ADP-ribosyltransferase	core	AMR	AMR	RIFAMYCIN	RIFAMYCIN	HMM	247	150	89.33	49.25	134	WP_063842214.1	NAD(+)--rifampin ADP-ribosyltransferase	NF033144.1	NAD(+)--rifampin ADP-ribosyltransferase	2
GCA_035693345.1	Puia sp.	HET7001872.1	blaOXA	class D beta-lactamase	core	AMR	AMR	BETA-LACTAM	BETA-LACTAM	HMM	268	284	96.83	36.92	279	WP_004650739.1	class D beta-lactamase	NF012161.0	class D beta-lactamase	1
GCA_035693345.1	Puia sp.	HET7002068.1	bla	BlaB/IND/MUS family subclass B1 metallo-beta-lactamase	core	AMR	AMR	BETA-LACTAM	BETA-LACTAM	HMM	252	241	100	55.37	242	WP_148044405.1	BlaB/IND/MUS family subclass B1 metallo-beta-lactamase	NF012146.1	BlaB/IND/MUS family subclass B1 metallo-beta-lactamase	3
GCA_035693085.1	Hanamia sp.	HET7115386.1	tet(L)	tetracycline efflux MFS transporter Tet(L)	core	AMR	AMR	TETRACYCLINE	TETRACYCLINE	EXACTP	460	460	100	100	460	WP_012477450.1	tetracycline efflux MFS transporter Tet(L)	NF012185.0	tetracycline efflux MFS transporter Tet(L)	3
GCA_035693085.1	Hanamia sp.	HET7116397.1	ant(6)-Ia	aminoglycoside nucleotidyltransferase ANT(6)-Ia	core	AMR	AMR	AMINOGLYCOSIDE	STREPTOMYCIN	EXACTP	287	287	100	100	287	WP_002294505.1	aminoglycoside nucleotidyltransferase ANT(6)-Ia	NF033084.2	aminoglycoside 6-nucleotidyltransferase	3
GCA_035693085.1	Hanamia sp.	HET7117773.1	bla	class A beta-lactamase, subclass A2	core	AMR	AMR	BETA-LACTAM	BETA-LACTAM	HMM	303	301	92.03	57.55	278	WP_032494759.1	class A beta-lactamase, subclass A2	NF012099.1	class A beta-lactamase, subclass A2	2
GCA_035693085.1	Hanamia sp.	HET7118045.1	merA	mercury(II) reductase	plus	STRESS	METAL	MERCURY	MERCURY	HMM	561	568	99.12	66.07	563	ADP02162.1	mercury(II) reductase	TIGR02053.1	mercury(II) reductase	2
GCA_035693085.1	Hanamia sp.	HET7119068.1	dfrD	trimethoprim-resistant dihydrofolate reductase DfrD	core	AMR	AMR	TRIMETHOPRIM	TRIMETHOPRIM	EXACTP	162	162	100	100	162	WP_063844481.1	trimethoprim-resistant dihydrofolate reductase DfrD	NF000159.1	trimethoprim-resistant dihydrofolate reductase DfrD	3
GCA_035708205.1	Edaphocola sp.	HET8572271.1	arr	NAD(+)--rifampin ADP-ribosyltransferase	core	AMR	AMR	RIFAMYCIN	RIFAMYCIN	HMM	247	143	82.52	55.08	118	WP_063842202.1	NAD(+)--rifampin ADP-ribosyltransferase	NF033144.1	NAD(+)--rifampin ADP-ribosyltransferase	3
GCA_035708205.1	Edaphocola sp.	HET8574097.1	bla	BlaB/IND/MUS family subclass B1 metallo-beta-lactamase	core	AMR	AMR	BETA-LACTAM	BETA-LACTAM	HMM	254	241	99.59	45.83	240	WP_148044405.1	BlaB/IND/MUS family subclass B1 metallo-beta-lactamase	NF012146.1	BlaB/IND/MUS family subclass B1 metallo-beta-lactamase	3
GCA_035703165.1	Chitinophagaceae bacterium	HET9055446.1	blaOXA	class D beta-lactamase	core	AMR	AMR	BETA-LACTAM	BETA-LACTAM	HMM	265	269	97.77	40.6	266	WP_242934118.1	class D beta-lactamase	NF012161.0	class D beta-lactamase	1
GCA_035703165.1	Chitinophagaceae bacterium	HET9057282.1	arsN2	arsenic resistance N-acetyltransferase ArsN2	plus	STRESS	METAL	ARSENIC	ARSENIC	HMM	148	164	76.22	33.6	125	ABU58394.1	arsenic resistance N-acetyltransferase ArsN2	NF040501.1	arsenic resistance N-acetyltransferase ArsN2	1
GCA_035712085.1	Flavitalea sp.	HET9278312.1	arsN2	arsenic resistance N-acetyltransferase ArsN2	plus	STRESS	METAL	ARSENIC	ARSENIC	HMM	146	164	79.88	40.46	131	ABU58394.1	arsenic resistance N-acetyltransferase ArsN2	NF040501.1	arsenic resistance N-acetyltransferase ArsN2	3
GCA_035709385.1	Chitinophagaceae bacterium	HET9430551.1	arsN2	arsenic resistance N-acetyltransferase ArsN2	plus	STRESS	METAL	ARSENIC	ARSENIC	HMM	278	144	86.11	40.8	125	KTT96020.1	arsenic resistance N-acetyltransferase ArsN2	NF040501.1	arsenic resistance N-acetyltransferase ArsN2	3
GCA_035709385.1	Chitinophagaceae bacterium	HET9430688.1	arsN1	arsinothricin resistance N-acetyltransferase ArsN1 family B	plus	STRESS	METAL	ARSENIC	ARSENIC	HMM	188	186	92.47	47.67	172	AAN67541.1	arsinothricin resistance N-acetyltransferase ArsN1 family B	NF040504.1	arsinothricin resistance N-acetyltransferase ArsN1 family B	3
GCA_035717045.1	Chitinophagaceae bacterium	HET9745321.1	arr	NAD(+)--rifampin ADP-ribosyltransferase	core	AMR	AMR	RIFAMYCIN	RIFAMYCIN	HMM	247	143	93.01	52.63	133	WP_063842202.1	NAD(+)--rifampin ADP-ribosyltransferase	NF033144.1	NAD(+)--rifampin ADP-ribosyltransferase	6
GCA_035717305.1	Chitinophagaceae bacterium	HET9824030.1	arr	NAD(+)--rifampin ADP-ribosyltransferase	core	AMR	AMR	RIFAMYCIN	RIFAMYCIN	HMM	142	150	86.67	60.77	130	WP_033959319.1	NAD(+)--rifampin ADP-ribosyltransferase	NF033144.1	NAD(+)--rifampin ADP-ribosyltransferase	6
GCA_035717305.1	Chitinophagaceae bacterium	HET9825794.1	arsN2	arsenic resistance N-acetyltransferase ArsN2	plus	STRESS	METAL	ARSENIC	ARSENIC	HMM	148	144	82.64	41.18	119	KTT96020.1	arsenic resistance N-acetyltransferase ArsN2	NF040501.1	arsenic resistance N-acetyltransferase ArsN2	6
GCA_035714205.1	Flavisolibacter sp.	HEU0109314.1	bla	subclass B1 metallo-beta-lactamase	core	AMR	AMR	BETA-LACTAM	BETA-LACTAM	HMM	265	266	99.62	59.25	265	WP_081048762.1	subclass B1 metallo-beta-lactamase	NF033088.2	subclass B1 metallo-beta-lactamase	6
GCA_035714205.1	Flavisolibacter sp.	HEU0109485.1	arsN2	arsenic resistance N-acetyltransferase ArsN2	plus	STRESS	METAL	ARSENIC	ARSENIC	HMM	149	147	93.2	35.77	137	ABG05788.1	arsenic resistance N-acetyltransferase ArsN2	NF040501.1	arsenic resistance N-acetyltransferase ArsN2	6
GCA_035714205.1	Flavisolibacter sp.	HEU0110757.1	blaOXA	class D beta-lactamase	core	AMR	AMR	BETA-LACTAM	BETA-LACTAM	HMM	270	258	93.41	40.71	253	WP_004919358.1	class D beta-lactamase	NF012161.0	class D beta-lactamase	6
GCA_035714205.1	Flavisolibacter sp.	HEU0111680.1	arr	NAD(+)--rifampin ADP-ribosyltransferase	core	AMR	AMR	RIFAMYCIN	RIFAMYCIN	HMM	145	137	96.35	56.82	132	WP_012695486.1	NAD(+)--rifampin ADP-ribosyltransferase	NF033144.1	NAD(+)--rifampin ADP-ribosyltransferase	6
GCA_035721085.1	Arachidicoccus soli	HEU0226797.1	bla	BlaB/IND/MUS family subclass B1 metallo-beta-lactamase	core	AMR	AMR	BETA-LACTAM	BETA-LACTAM	HMM	250	248	96.37	48.95	239	WP_012025466.1	BlaB/IND/MUS family subclass B1 metallo-beta-lactamase	NF012146.1	BlaB/IND/MUS family subclass B1 metallo-beta-lactamase	6
GCA_035721085.1	Arachidicoccus soli	HEU0228376.1	arr	NAD(+)--rifampin ADP-ribosyltransferase	core	AMR	AMR	RIFAMYCIN	RIFAMYCIN	HMM	247	143	82.52	50	118	WP_063842202.1	NAD(+)--rifampin ADP-ribosyltransferase	NF033144.1	NAD(+)--rifampin ADP-ribosyltransferase	6
GCA_035761965.1	Flavisolibacter sp.	HEU4470404.1	bla	subclass B1 metallo-beta-lactamase	core	AMR	AMR	BETA-LACTAM	BETA-LACTAM	HMM	269	266	85.71	54.82	228	WP_081048762.1	subclass B1 metallo-beta-lactamase	NF033088.2	subclass B1 metallo-beta-lactamase	6
GCA_035761965.1	Flavisolibacter sp.	HEU4470785.1	arr	NAD(+)--rifampin ADP-ribosyltransferase	core	AMR	AMR	RIFAMYCIN	RIFAMYCIN	HMM	148	150	90.67	57.35	136	WP_033959319.1	NAD(+)--rifampin ADP-ribosyltransferase	NF033144.1	NAD(+)--rifampin ADP-ribosyltransferase	6
GCA_035761305.1	Chitinophaga sp.	HEU4551270.1	bla	subclass B3 metallo-beta-lactamase	core	AMR	AMR	BETA-LACTAM	BETA-LACTAM	HMM	294	289	99.65	65.97	288	WP_041884311.1	subclass B3 metallo-beta-lactamase	NF033105.1	subclass B3 metallo-beta-lactamase	6
GCA_035761305.1	Chitinophaga sp.	HEU4554068.1	bla	class A beta-lactamase, subclass A2	core	AMR	AMR	BETA-LACTAM	BETA-LACTAM	HMM	309	303	94.39	49.65	286	WP_041881964.1	class A beta-lactamase, subclass A2	NF012099.1	class A beta-lactamase, subclass A2	5
GCA_035761305.1	Chitinophaga sp.	HEU4556080.1	blaOXA	class D beta-lactamase	core	AMR	AMR	BETA-LACTAM	BETA-LACTAM	HMM	267	289	84.78	43.72	247	WP_075071939.1	class D beta-lactamase	NF012161.0	class D beta-lactamase	5
GCA_035760665.1	Chitinophagaceae bacterium	HEU4574849.1	arr	NAD(+)--rifampin ADP-ribosyltransferase	core	AMR	AMR	RIFAMYCIN	RIFAMYCIN	HMM	247	150	84	49.61	129	WP_063857694.1	NAD(+)--rifampin ADP-ribosyltransferase	NF033144.1	NAD(+)--rifampin ADP-ribosyltransferase	5
GCA_035760665.1	Chitinophagaceae bacterium	HEU4575092.1	blaOXA	class D beta-lactamase	core	AMR	AMR	BETA-LACTAM	BETA-LACTAM	HMM	269	258	94.19	39.53	253	WP_004919358.1	class D beta-lactamase	NF012161.0	class D beta-lactamase	5
GCA_035760665.1	Chitinophagaceae bacterium	HEU4575671.1	arsN2	arsenic resistance N-acetyltransferase ArsN2	plus	STRESS	METAL	ARSENIC	ARSENIC	HMM	147	142	97.18	37.68	138	ABB05616.1	arsenic resistance N-acetyltransferase ArsN2	NF040501.1	arsenic resistance N-acetyltransferase ArsN2	5
GCA_035759255.1	Chitinophagaceae bacterium	HEU4859268.1	arr	NAD(+)--rifampin ADP-ribosyltransferase	core	AMR	AMR	RIFAMYCIN	RIFAMYCIN	HMM	148	137	100	61.31	137	WP_012695486.1	NAD(+)--rifampin ADP-ribosyltransferase	NF033144.1	NAD(+)--rifampin ADP-ribosyltransferase	3
GCA_035759375.1	Flavisolibacter sp.	HEU4901234.1	arr	NAD(+)--rifampin ADP-ribosyltransferase	core	AMR	AMR	RIFAMYCIN	RIFAMYCIN	HMM	229	150	83.33	55.2	125	WP_000237816.1	NAD(+)--rifampin ADP-ribosyltransferase	NF033144.1	NAD(+)--rifampin ADP-ribosyltransferase	3
GCA_035759375.1	Flavisolibacter sp.	HEU4903067.1	arsN2	arsenic resistance N-acetyltransferase ArsN2	plus	STRESS	METAL	ARSENIC	ARSENIC	HMM	142	144	97.92	40.85	142	KTT96020.1	arsenic resistance N-acetyltransferase ArsN2	NF040501.1	arsenic resistance N-acetyltransferase ArsN2	3
GCA_035765495.1	Hanamia sp.	HEU5051865.1	bla	subclass B3 metallo-beta-lactamase	core	AMR	AMR	BETA-LACTAM	BETA-LACTAM	HMM	279	289	96.19	64.03	278	WP_041884311.1	subclass B3 metallo-beta-lactamase	NF033105.1	subclass B3 metallo-beta-lactamase	3
GCA_035765495.1	Hanamia sp.	HEU5052972.1	bla	class A beta-lactamase, subclass A2	core	AMR	AMR	BETA-LACTAM	BETA-LACTAM	HMM	299	304	100	56.72	305	WP_154469535.1	class A beta-lactamase, subclass A2	NF012099.1	class A beta-lactamase, subclass A2	3
GCA_035765495.1	Hanamia sp.	HEU5053197.1	arr	NAD(+)--rifampin ADP-ribosyltransferase	core	AMR	AMR	RIFAMYCIN	RIFAMYCIN	HMM	247	150	88.67	51.88	133	WP_000237816.1	NAD(+)--rifampin ADP-ribosyltransferase	NF033144.1	NAD(+)--rifampin ADP-ribosyltransferase	3
GCA_035764525.1	Chitinophagaceae bacterium	HEU5166064.1	arr	NAD(+)--rifampin ADP-ribosyltransferase	core	AMR	AMR	RIFAMYCIN	RIFAMYCIN	HMM	247	143	85.31	54.1	122	WP_063842202.1	NAD(+)--rifampin ADP-ribosyltransferase	NF033144.1	NAD(+)--rifampin ADP-ribosyltransferase	4
GCA_035764525.1	Chitinophagaceae bacterium	HEU5167938.1	bla	subclass B3 metallo-beta-lactamase	core	AMR	AMR	BETA-LACTAM	BETA-LACTAM	HMM	224	293	75.77	69.37	222	WP_063842707.1	subclass B3 metallo-beta-lactamase	NF033105.1	subclass B3 metallo-beta-lactamase	4
GCA_035946435.1	Puia sp.	HEV2482049.1	bla	class A beta-lactamase	core	AMR	AMR	BETA-LACTAM	BETA-LACTAM	HMM	298	319	85.58	40.88	274	WP_063842272.1	class A beta-lactamase	NF033103.1	class A beta-lactamase	4
GCA_035946435.1	Puia sp.	HEV2483755.1	bla	subclass B3 metallo-beta-lactamase	core	AMR	AMR	BETA-LACTAM	BETA-LACTAM	HMM	292	300	97	53.77	292	WP_063842717.1	subclass B3 metallo-beta-lactamase	NF033105.1	subclass B3 metallo-beta-lactamase	4
GCA_035941775.1	Hanamia sp.	HEV2831704.1	blaOXA	class D beta-lactamase	core	AMR	AMR	BETA-LACTAM	BETA-LACTAM	HMM	270	274	100	39.57	278	WP_004295324.1	class D beta-lactamase	NF012161.0	class D beta-lactamase	2
GCA_035937535.1	Puia sp.	HEV3222984.1	blaOXA	class D beta-lactamase	core	AMR	AMR	BETA-LACTAM	BETA-LACTAM	HMM	268	276	96.74	36.16	271	WP_204376238.1	class D beta-lactamase	NF012161.0	class D beta-lactamase	2
GCA_035949595.1	Puia sp.	HEV3250531.1	blaOXA	class D beta-lactamase	core	AMR	AMR	BETA-LACTAM	BETA-LACTAM	HMM	289	269	100	38.6	272	WP_242934118.1	class D beta-lactamase	NF012161.0	class D beta-lactamase	2
GCA_035948735.1	Puia sp.	HEV3324626.1	bla	class A beta-lactamase, subclass A2	core	AMR	AMR	BETA-LACTAM	BETA-LACTAM	HMM	300	303	91.75	44.6	278	WP_041881964.1	class A beta-lactamase, subclass A2	NF012099.1	class A beta-lactamase, subclass A2	2
GCA_035998945.1	Flavisolibacter sp.	HEV7331214.1	bla	subclass B1 metallo-beta-lactamase	core	AMR	AMR	BETA-LACTAM	BETA-LACTAM	HMM	244	247	88.26	53.42	219	WP_013992183.1	subclass B1 metallo-beta-lactamase	NF033088.2	subclass B1 metallo-beta-lactamase	1
GCA_035998945.1	Flavisolibacter sp.	HEV7332555.1	arsN2	arsenic resistance N-acetyltransferase ArsN2	plus	STRESS	METAL	ARSENIC	ARSENIC	HMM	152	142	100	36.62	142	ABB05616.1	arsenic resistance N-acetyltransferase ArsN2	NF040501.1	arsenic resistance N-acetyltransferase ArsN2	1
GCA_035998945.1	Flavisolibacter sp.	HEV7333633.1	arr	NAD(+)--rifampin ADP-ribosyltransferase	core	AMR	AMR	RIFAMYCIN	RIFAMYCIN	HMM	147	137	97.08	56.39	133	WP_012695486.1	NAD(+)--rifampin ADP-ribosyltransferase	NF033144.1	NAD(+)--rifampin ADP-ribosyltransferase	1
GCA_035996125.1	Flavisolibacter sp.	HEV7621423.1	bla	subclass B3 metallo-beta-lactamase	core	AMR	AMR	BETA-LACTAM	BETA-LACTAM	HMM	294	289	99.65	59.72	288	WP_041884311.1	subclass B3 metallo-beta-lactamase	NF033105.1	subclass B3 metallo-beta-lactamase	2
GCA_036009775.1	Chitinophagaceae bacterium	HEV7779651.1	arr	NAD(+)--rifampin ADP-ribosyltransferase	core	AMR	AMR	RIFAMYCIN	RIFAMYCIN	HMM	247	150	82.67	53.23	124	WP_052238312.1	NAD(+)--rifampin ADP-ribosyltransferase	NF033144.1	NAD(+)--rifampin ADP-ribosyltransferase	2
GCA_036009775.1	Chitinophagaceae bacterium	HEV7783251.1	bla	BlaB/IND/MUS family subclass B1 metallo-beta-lactamase	core	AMR	AMR	BETA-LACTAM	BETA-LACTAM	HMM	243	241	94.19	60.53	228	WP_148044405.1	BlaB/IND/MUS family subclass B1 metallo-beta-lactamase	NF012146.1	BlaB/IND/MUS family subclass B1 metallo-beta-lactamase	2
GCA_036007525.1	Chitinophagaceae bacterium	HEV8079992.1	blaOXA	class D beta-lactamase	core	AMR	AMR	BETA-LACTAM	BETA-LACTAM	HMM	272	258	97.29	39.31	262	WP_004919358.1	class D beta-lactamase	NF012161.0	class D beta-lactamase	2
GCA_036007765.1	Chitinophagaceae bacterium	HEV8083435.1	blaOXA	class D beta-lactamase	core	AMR	AMR	BETA-LACTAM	BETA-LACTAM	HMM	270	274	100	40.65	278	WP_014053563.1	class D beta-lactamase	NF012161.0	class D beta-lactamase	2
GCA_036005825.1	Chitinophagaceae bacterium	HEV8269783.1	bla	subclass B3 metallo-beta-lactamase	core	AMR	AMR	BETA-LACTAM	BETA-LACTAM	HMM	313	300	97.67	63.82	293	WP_063842717.1	subclass B3 metallo-beta-lactamase	NF033105.1	subclass B3 metallo-beta-lactamase	2
GCA_036005825.1	Chitinophagaceae bacterium	HEV8271799.1	arr	NAD(+)--rifampin ADP-ribosyltransferase	core	AMR	AMR	RIFAMYCIN	RIFAMYCIN	HMM	247	150	82.67	54.03	124	WP_000237816.1	NAD(+)--rifampin ADP-ribosyltransferase	NF033144.1	NAD(+)--rifampin ADP-ribosyltransferase	1
GCA_036005185.1	Chitinophagaceae bacterium	HEV8285195.1	arr	NAD(+)--rifampin ADP-ribosyltransferase	core	AMR	AMR	RIFAMYCIN	RIFAMYCIN	HMM	231	143	85.31	54.1	122	WP_063842202.1	NAD(+)--rifampin ADP-ribosyltransferase	NF033144.1	NAD(+)--rifampin ADP-ribosyltransferase	3
GCA_036005185.1	Chitinophagaceae bacterium	HEV8285520.1	arsN2	arsenic resistance N-acetyltransferase ArsN2	plus	STRESS	METAL	ARSENIC	ARSENIC	HMM	148	144	82.64	43.7	119	KTT96020.1	arsenic resistance N-acetyltransferase ArsN2	NF040501.1	arsenic resistance N-acetyltransferase ArsN2	3
GCA_036002905.1	Chitinophagaceae bacterium	HEV8504328.1	arsN2	arsenic resistance N-acetyltransferase ArsN2	plus	STRESS	METAL	ARSENIC	ARSENIC	HMM	148	144	100	39.46	147	KTT96020.1	arsenic resistance N-acetyltransferase ArsN2	NF040501.1	arsenic resistance N-acetyltransferase ArsN2	3
GCA_036002905.1	Chitinophagaceae bacterium	HEV8506786.1	bla	BlaB/IND/MUS family subclass B1 metallo-beta-lactamase	core	AMR	AMR	BETA-LACTAM	BETA-LACTAM	HMM	263	246	97.97	54.96	242	WP_318245543.1	BlaB/IND/MUS family subclass B1 metallo-beta-lactamase	NF012146.1	BlaB/IND/MUS family subclass B1 metallo-beta-lactamase	3
GCA_036002905.1	Chitinophagaceae bacterium	HEV8507762.1	bla	BlaB/IND/MUS family subclass B1 metallo-beta-lactamase	core	AMR	AMR	BETA-LACTAM	BETA-LACTAM	HMM	247	241	100	56.61	242	WP_148044405.1	BlaB/IND/MUS family subclass B1 metallo-beta-lactamase	NF012146.1	BlaB/IND/MUS family subclass B1 metallo-beta-lactamase	3
GCA_036263755.1	Chitinophagaceae bacterium	HEX2533607.1	arsN2	arsenic resistance N-acetyltransferase ArsN2	plus	STRESS	METAL	ARSENIC	ARSENIC	HMM	149	144	98.61	39.86	143	KTT96020.1	arsenic resistance N-acetyltransferase ArsN2	NF040501.1	arsenic resistance N-acetyltransferase ArsN2	3
GCA_036263755.1	Chitinophagaceae bacterium	HEX2535133.1	arr	NAD(+)--rifampin ADP-ribosyltransferase	core	AMR	AMR	RIFAMYCIN	RIFAMYCIN	HMM	145	143	98.6	56.03	141	WP_063842202.1	NAD(+)--rifampin ADP-ribosyltransferase	NF033144.1	NAD(+)--rifampin ADP-ribosyltransferase	5
GCA_036263755.1	Chitinophagaceae bacterium	HEX2536267.1	bla	BlaB/IND/MUS family subclass B1 metallo-beta-lactamase	core	AMR	AMR	BETA-LACTAM	BETA-LACTAM	HMM	240	241	99.17	53.75	240	WP_148044405.1	BlaB/IND/MUS family subclass B1 metallo-beta-lactamase	NF012146.1	BlaB/IND/MUS family subclass B1 metallo-beta-lactamase	5
GCA_036263415.1	Flavisolibacter sp.	HEX2605878.1	arsN1	arsinothricin resistance N-acetyltransferase ArsN1 family B	plus	STRESS	METAL	ARSENIC	ARSENIC	HMM	200	186	93.55	47.7	174	AAN67541.1	arsinothricin resistance N-acetyltransferase ArsN1 family B	NF040504.1	arsinothricin resistance N-acetyltransferase ArsN1 family B	5
GCA_036263415.1	Flavisolibacter sp.	HEX2608017.1	bla	subclass B3 metallo-beta-lactamase	core	AMR	AMR	BETA-LACTAM	BETA-LACTAM	HMM	323	293	87.03	39.16	263	WP_219860713.1	subclass B3 metallo-beta-lactamase	NF033105.1	subclass B3 metallo-beta-lactamase	5
GCA_036263415.1	Flavisolibacter sp.	HEX2608615.1	arr	NAD(+)--rifampin ADP-ribosyltransferase	core	AMR	AMR	RIFAMYCIN	RIFAMYCIN	HMM	145	143	88.81	62.99	127	WP_063842202.1	NAD(+)--rifampin ADP-ribosyltransferase	NF033144.1	NAD(+)--rifampin ADP-ribosyltransferase	5
GCA_036263415.1	Flavisolibacter sp.	HEX2609230.1	bla	subclass B3 metallo-beta-lactamase	core	AMR	AMR	BETA-LACTAM	BETA-LACTAM	HMM	296	294	97.96	53.29	289	WP_063842712.1	subclass B3 metallo-beta-lactamase	NF033105.1	subclass B3 metallo-beta-lactamase	2
GCA_036262815.1	Chitinophagaceae bacterium	HEX2630738.1	arsN2	arsenic resistance N-acetyltransferase ArsN2	plus	STRESS	METAL	ARSENIC	ARSENIC	HMM	280	131	91.6	42.86	126	AAA27589.1	arsenic resistance N-acetyltransferase ArsN2	NF040501.1	arsenic resistance N-acetyltransferase ArsN2	2
GCA_036262095.1	Chitinophagaceae bacterium	HEX2846023.1	bla	class A beta-lactamase	core	AMR	AMR	BETA-LACTAM	BETA-LACTAM	HMM	299	299	95.32	39.06	297	WP_094009812.1	class A beta-lactamase	NF033103.1	class A beta-lactamase	2
GCA_036262095.1	Chitinophagaceae bacterium	HEX2847811.1	bla	subclass B3 metallo-beta-lactamase	core	AMR	AMR	BETA-LACTAM	BETA-LACTAM	HMM	291	289	99.65	68.75	288	WP_041884311.1	subclass B3 metallo-beta-lactamase	NF033105.1	subclass B3 metallo-beta-lactamase	2
GCA_036266375.1	Puia sp.	HEX3079678.1	blaOXA	class D beta-lactamase	core	AMR	AMR	BETA-LACTAM	BETA-LACTAM	HMM	268	284	96.83	36.56	279	WP_004650739.1	class D beta-lactamase	NF012161.0	class D beta-lactamase	1
GCA_036266275.1	Chitinophagaceae bacterium	HEX3165858.1	arr	NAD(+)--rifampin ADP-ribosyltransferase	core	AMR	AMR	RIFAMYCIN	RIFAMYCIN	HMM	247	150	86	52.71	129	WP_033959319.1	NAD(+)--rifampin ADP-ribosyltransferase	NF033144.1	NAD(+)--rifampin ADP-ribosyltransferase	1
GCA_036266275.1	Chitinophagaceae bacterium	HEX3166271.1	bla	subclass B3 metallo-beta-lactamase	core	AMR	AMR	BETA-LACTAM	BETA-LACTAM	HMM	293	289	99.65	65.62	288	WP_041884311.1	subclass B3 metallo-beta-lactamase	NF033105.1	subclass B3 metallo-beta-lactamase	1
GCA_036271995.1	Puia sp.	HEX4371703.1	arr	NAD(+)--rifampin ADP-ribosyltransferase	core	AMR	AMR	RIFAMYCIN	RIFAMYCIN	HMM	231	150	82.67	51.61	124	WP_033959319.1	NAD(+)--rifampin ADP-ribosyltransferase	NF033144.1	NAD(+)--rifampin ADP-ribosyltransferase	3
GCA_036271995.1	Puia sp.	HEX4372885.1	bla	class A beta-lactamase, subclass A2	core	AMR	AMR	BETA-LACTAM	BETA-LACTAM	HMM	301	304	100	61.51	304	WP_154469535.1	class A beta-lactamase, subclass A2	NF012099.1	class A beta-lactamase, subclass A2	3
GCA_036275875.1	Puia sp.	HEX4851071.1	bla	BlaB/IND/MUS family subclass B1 metallo-beta-lactamase	core	AMR	AMR	BETA-LACTAM	BETA-LACTAM	HMM	241	241	99.59	54.77	241	WP_148044405.1	BlaB/IND/MUS family subclass B1 metallo-beta-lactamase	NF012146.1	BlaB/IND/MUS family subclass B1 metallo-beta-lactamase	3
GCA_036275415.1	Chitinophagaceae bacterium	HEX4876650.1	bla	BlaB/IND/MUS family subclass B1 metallo-beta-lactamase	core	AMR	AMR	BETA-LACTAM	BETA-LACTAM	HMM	244	248	99.19	51.63	246	WP_012025466.1	BlaB/IND/MUS family subclass B1 metallo-beta-lactamase	NF012146.1	BlaB/IND/MUS family subclass B1 metallo-beta-lactamase	1
GCA_036275135.1	Lacibacter sp.	HEX4956853.1	bla	subclass B1 metallo-beta-lactamase	core	AMR	AMR	BETA-LACTAM	BETA-LACTAM	HMM	252	253	98.81	66.8	250	WP_119059468.1	subclass B1 metallo-beta-lactamase	NF033088.2	subclass B1 metallo-beta-lactamase	2
GCA_036275135.1	Lacibacter sp.	HEX4957528.1	blaOXA	class D beta-lactamase	core	AMR	AMR	BETA-LACTAM	BETA-LACTAM	HMM	268	258	95.74	37.88	264	WP_004919358.1	class D beta-lactamase	NF012161.0	class D beta-lactamase	2
GCA_036274715.1	Agriterribacter sp.	HEX5025228.1	blaOXA	class D beta-lactamase	core	AMR	AMR	BETA-LACTAM	BETA-LACTAM	HMM	272	273	97.07	39.48	271	WP_420354126.1	class D beta-lactamase	NF012161.0	class D beta-lactamase	2
GCA_036274175.1	Parafilimonas sp.	HEX5152359.1	bla	subclass B3 metallo-beta-lactamase	core	AMR	AMR	BETA-LACTAM	BETA-LACTAM	HMM	280	293	94.2	73.74	278	WP_063842707.1	subclass B3 metallo-beta-lactamase	NF033105.1	subclass B3 metallo-beta-lactamase	2
GCA_036278455.1	Chitinophagaceae bacterium	HEX5552343.1	arr	NAD(+)--rifampin ADP-ribosyltransferase	core	AMR	AMR	RIFAMYCIN	RIFAMYCIN	HMM	247	150	86	51.94	129	WP_033959319.1	NAD(+)--rifampin ADP-ribosyltransferase	NF033144.1	NAD(+)--rifampin ADP-ribosyltransferase	2
GCA_036278455.1	Chitinophagaceae bacterium	HEX5553482.1	bla	class A beta-lactamase	core	AMR	AMR	BETA-LACTAM	BETA-LACTAM	HMM	312	319	84.33	52.77	271	WP_063842272.1	class A beta-lactamase	NF033103.1	class A beta-lactamase	2
GCA_036278455.1	Chitinophagaceae bacterium	HEX5553890.1	bla	BlaB/IND/MUS family subclass B1 metallo-beta-lactamase	core	AMR	AMR	BETA-LACTAM	BETA-LACTAM	HMM	244	248	94.35	51.69	236	WP_012025466.1	BlaB/IND/MUS family subclass B1 metallo-beta-lactamase	NF012146.1	BlaB/IND/MUS family subclass B1 metallo-beta-lactamase	1
GCA_036277695.1	Chitinophagaceae bacterium	HEX5651619.1	arsN2	arsenic resistance N-acetyltransferase ArsN2	plus	STRESS	METAL	ARSENIC	ARSENIC	HMM	278	144	86.11	40.8	125	KTT96020.1	arsenic resistance N-acetyltransferase ArsN2	NF040501.1	arsenic resistance N-acetyltransferase ArsN2	2
GCA_036277475.1	Chitinophagaceae bacterium	HEX5669660.1	bla	subclass B1 metallo-beta-lactamase	core	AMR	AMR	BETA-LACTAM	BETA-LACTAM	HMM	248	252	88.1	66.22	222	WP_202272142.1	subclass B1 metallo-beta-lactamase	NF033088.2	subclass B1 metallo-beta-lactamase	2
GCA_036374555.1	Chitinophagaceae bacterium	HEX6168626.1	arr	NAD(+)--rifampin ADP-ribosyltransferase	core	AMR	AMR	RIFAMYCIN	RIFAMYCIN	HMM	247	143	86.01	53.66	123	WP_063842202.1	NAD(+)--rifampin ADP-ribosyltransferase	NF033144.1	NAD(+)--rifampin ADP-ribosyltransferase	1
GCA_036374555.1	Chitinophagaceae bacterium	HEX6171302.1	bla	subclass B3 metallo-beta-lactamase	core	AMR	AMR	BETA-LACTAM	BETA-LACTAM	HMM	285	293	97.27	66.08	286	WP_063842707.1	subclass B3 metallo-beta-lactamase	NF033105.1	subclass B3 metallo-beta-lactamase	1
GCA_036374475.1	Chitinophagaceae bacterium	HEX6181613.1	bla	BlaB/IND/MUS family subclass B1 metallo-beta-lactamase	core	AMR	AMR	BETA-LACTAM	BETA-LACTAM	HMM	243	241	96.27	59.05	232	WP_148044405.1	BlaB/IND/MUS family subclass B1 metallo-beta-lactamase	NF012146.1	BlaB/IND/MUS family subclass B1 metallo-beta-lactamase	2
GCA_036374495.1	Chitinophagaceae bacterium	HEX6191740.1	arsN2	arsenic resistance N-acetyltransferase ArsN2	plus	STRESS	METAL	ARSENIC	ARSENIC	HMM	146	142	100	34.51	142	ABB05616.1	arsenic resistance N-acetyltransferase ArsN2	NF040501.1	arsenic resistance N-acetyltransferase ArsN2	2
GCA_036374495.1	Chitinophagaceae bacterium	HEX6192882.1	arsN2	arsenic resistance N-acetyltransferase ArsN2	plus	STRESS	METAL	ARSENIC	ARSENIC	HMM	274	131	91.6	43.09	123	AAA25638.1	arsenic resistance N-acetyltransferase ArsN2	NF040501.1	arsenic resistance N-acetyltransferase ArsN2	2
GCA_036373835.1	Flavisolibacter sp.	HEX6333036.1	arsN2	arsenic resistance N-acetyltransferase ArsN2	plus	STRESS	METAL	ARSENIC	ARSENIC	HMM	141	144	87.5	39.68	126	KTT96020.1	arsenic resistance N-acetyltransferase ArsN2	NF040501.1	arsenic resistance N-acetyltransferase ArsN2	2
GCA_036373835.1	Flavisolibacter sp.	HEX6333117.1	arr	NAD(+)--rifampin ADP-ribosyltransferase	core	AMR	AMR	RIFAMYCIN	RIFAMYCIN	HMM	142	143	88.81	63.78	127	WP_063842202.1	NAD(+)--rifampin ADP-ribosyltransferase	NF033144.1	NAD(+)--rifampin ADP-ribosyltransferase	1
GCA_036379015.1	Niastella sp.	HEX6426477.1	arsN2	arsenic resistance N-acetyltransferase ArsN2	plus	STRESS	METAL	ARSENIC	ARSENIC	HMM	150	147	92.52	33.09	136	ABG05788.1	arsenic resistance N-acetyltransferase ArsN2	NF040501.1	arsenic resistance N-acetyltransferase ArsN2	1
GCA_036376375.1	Chitinophagaceae bacterium	HEX6845923.1	arr	NAD(+)--rifampin ADP-ribosyltransferase	core	AMR	AMR	RIFAMYCIN	RIFAMYCIN	HMM	247	150	82.67	51.61	124	WP_000237816.1	NAD(+)--rifampin ADP-ribosyltransferase	NF033144.1	NAD(+)--rifampin ADP-ribosyltransferase	2
GCA_036376375.1	Chitinophagaceae bacterium	HEX6848866.1	bla	subclass B3 metallo-beta-lactamase	core	AMR	AMR	BETA-LACTAM	BETA-LACTAM	HMM	292	289	99.65	55.56	288	WP_041884311.1	subclass B3 metallo-beta-lactamase	NF033105.1	subclass B3 metallo-beta-lactamase	2
GCA_036375835.1	Chitinophagaceae bacterium	HEX6914812.1	arsN2	arsenic resistance N-acetyltransferase ArsN2	plus	STRESS	METAL	ARSENIC	ARSENIC	HMM	149	164	84.76	39.57	139	ABU58394.1	arsenic resistance N-acetyltransferase ArsN2	NF040501.1	arsenic resistance N-acetyltransferase ArsN2	4
GCA_036375835.1	Chitinophagaceae bacterium	HEX6915310.1	bla	BlaB/IND/MUS family subclass B1 metallo-beta-lactamase	core	AMR	AMR	BETA-LACTAM	BETA-LACTAM	HMM	258	241	93.36	53.74	227	WP_148044405.1	BlaB/IND/MUS family subclass B1 metallo-beta-lactamase	NF012146.1	BlaB/IND/MUS family subclass B1 metallo-beta-lactamase	4
GCA_036375835.1	Chitinophagaceae bacterium	HEX6916029.1	arr	NAD(+)--rifampin ADP-ribosyltransferase	core	AMR	AMR	RIFAMYCIN	RIFAMYCIN	HMM	143	150	87.33	56.49	131	WP_052238312.1	NAD(+)--rifampin ADP-ribosyltransferase	NF033144.1	NAD(+)--rifampin ADP-ribosyltransferase	4
GCA_036375835.1	Chitinophagaceae bacterium	HEX6916299.1	blaOXA	class D beta-lactamase	core	AMR	AMR	BETA-LACTAM	BETA-LACTAM	HMM	273	270	91.85	42.06	252	WP_178317675.1	class D beta-lactamase	NF012161.0	class D beta-lactamase	4
GCA_036382435.1	Ginsengibacter sp.	HEX7458755.1	blaOXA	class D beta-lactamase	core	AMR	AMR	BETA-LACTAM	BETA-LACTAM	HMM	270	267	94.76	41.86	258	WP_003235647.1	class D beta-lactamase	NF012161.0	class D beta-lactamase	3
GCA_036384555.1	Niabella sp.	HEX7755259.1	vanR	VanR-ABDEGLN family response regulator transcription factor	core	AMR	AMR	GLYCOPEPTIDE	VANCOMYCIN	HMM	235	232	100	88.36	232	WP_011461303.1	VanR-ABDEGLN family response regulator transcription factor	NF033117.2	VanR-ABDEGLN family response regulator transcription factor	3
GCA_036384555.1	Niabella sp.	HEX7755260.1	vanS	vancomycin resistance histidine kinase VanS	core	AMR	AMR	GLYCOPEPTIDE	VANCOMYCIN	HMM	369	392	94.64	77.09	371	WP_011461302.1	vancomycin resistance histidine kinase VanS	NF033091.0	vancomycin resistance histidine kinase VanS	3
GCA_036384555.1	Niabella sp.	HEX7755552.1	arr	NAD(+)--rifampin ADP-ribosyltransferase	core	AMR	AMR	RIFAMYCIN	RIFAMYCIN	HMM	247	143	84.62	52.07	121	WP_063842202.1	NAD(+)--rifampin ADP-ribosyltransferase	NF033144.1	NAD(+)--rifampin ADP-ribosyltransferase	1
GCA_036384555.1	Niabella sp.	HEX7756235.1	bla	subclass B3 metallo-beta-lactamase	core	AMR	AMR	BETA-LACTAM	BETA-LACTAM	HMM	296	293	87.37	64.84	256	WP_063842707.1	subclass B3 metallo-beta-lactamase	NF033105.1	subclass B3 metallo-beta-lactamase	2
GCA_036383615.1	Chitinophagaceae bacterium	HEX7847149.1	arr	NAD(+)--rifampin ADP-ribosyltransferase	core	AMR	AMR	RIFAMYCIN	RIFAMYCIN	HMM	148	137	97.08	57.89	133	WP_012695486.1	NAD(+)--rifampin ADP-ribosyltransferase	NF033144.1	NAD(+)--rifampin ADP-ribosyltransferase	2
GCA_036383515.1	Chitinophagaceae bacterium	HEX7903891.1	arr	NAD(+)--rifampin ADP-ribosyltransferase	core	AMR	AMR	RIFAMYCIN	RIFAMYCIN	HMM	247	150	90.67	49.26	136	WP_000237816.1	NAD(+)--rifampin ADP-ribosyltransferase	NF033144.1	NAD(+)--rifampin ADP-ribosyltransferase	1
GCA_036383515.1	Chitinophagaceae bacterium	HEX7904515.1	arsN2	arsenic resistance N-acetyltransferase ArsN2	plus	STRESS	METAL	ARSENIC	ARSENIC	HMM	279	131	91.6	45.6	125	AAA25638.1	arsenic resistance N-acetyltransferase ArsN2	NF040501.1	arsenic resistance N-acetyltransferase ArsN2	1
GCA_036383515.1	Chitinophagaceae bacterium	HEX7906446.1	arsN1	arsinothricin resistance N-acetyltransferase ArsN1 family B	plus	STRESS	METAL	ARSENIC	ARSENIC	HMM	187	186	91.4	45.29	170	AAN67541.1	arsinothricin resistance N-acetyltransferase ArsN1 family B	NF040504.1	arsinothricin resistance N-acetyltransferase ArsN1 family B	2
GCA_036388115.1	Flavisolibacter sp.	HEX8315171.1	arsN2	arsenic resistance N-acetyltransferase ArsN2	plus	STRESS	METAL	ARSENIC	ARSENIC	HMM	143	144	96.53	38.13	139	KTT96020.1	arsenic resistance N-acetyltransferase ArsN2	NF040501.1	arsenic resistance N-acetyltransferase ArsN2	2
GCA_036394375.1	Puia sp.	HEX9512421.1	bla	subclass B1 metallo-beta-lactamase	core	AMR	AMR	BETA-LACTAM	BETA-LACTAM	HMM	254	237	99.16	50.2	247	WP_063864592.1	subclass B1 metallo-beta-lactamase	NF033088.2	subclass B1 metallo-beta-lactamase	2
GCA_036394375.1	Puia sp.	HEX9512538.1	merA	mercury(II) reductase	plus	STRESS	METAL	MERCURY	MERCURY	HMM	571	568	98.06	67.86	557	ADP02162.1	mercury(II) reductase	TIGR02053.1	mercury(II) reductase	2
GCA_036402455.1	Chitinophaga sp.	HEY0608291.1	blaOXA	class D beta-lactamase	core	AMR	AMR	BETA-LACTAM	BETA-LACTAM	HMM	242	289	80.28	44.07	236	WP_075071939.1	class D beta-lactamase	NF012161.0	class D beta-lactamase	2
GCA_036402455.1	Chitinophaga sp.	HEY0608537.1	bla	subclass B3 metallo-beta-lactamase	core	AMR	AMR	BETA-LACTAM	BETA-LACTAM	HMM	293	289	92.39	66.67	267	WP_041884311.1	subclass B3 metallo-beta-lactamase	NF033105.1	subclass B3 metallo-beta-lactamase	2
GCA_036402455.1	Chitinophaga sp.	HEY0612832.1	bla	metallo-beta-lactamase	core	AMR	AMR	BETA-LACTAM	BETA-LACTAM	HMM	160	246	65.45	42.86	161	WP_318245543.1	metallo-beta-lactamase	NF012229.1	metallo-beta-lactamase	3
GCA_036402175.1	Chitinophagaceae bacterium	HEY0677703.1	bla	class A beta-lactamase	core	AMR	AMR	BETA-LACTAM	BETA-LACTAM	HMM	342	299	92.98	38.93	280	WP_094009812.1	class A beta-lactamase	NF033103.1	class A beta-lactamase	3
GCA_036402175.1	Chitinophagaceae bacterium	HEY0679986.1	bla	BlaB/IND/MUS family subclass B1 metallo-beta-lactamase	core	AMR	AMR	BETA-LACTAM	BETA-LACTAM	HMM	243	241	95.85	59.48	232	WP_148044405.1	BlaB/IND/MUS family subclass B1 metallo-beta-lactamase	NF012146.1	BlaB/IND/MUS family subclass B1 metallo-beta-lactamase	3
GCA_036401835.1	Chitinophagaceae bacterium	HEY0731406.1	arsN2	arsenic resistance N-acetyltransferase ArsN2	plus	STRESS	METAL	ARSENIC	ARSENIC	HMM	144	142	100	37.32	142	ABB05616.1	arsenic resistance N-acetyltransferase ArsN2	NF040501.1	arsenic resistance N-acetyltransferase ArsN2	2
GCA_036405675.1	Sediminibacterium sp.	HEY1018771.1	blaOXA	class D beta-lactamase	core	AMR	AMR	BETA-LACTAM	BETA-LACTAM	HMM	280	278	99.28	37.85	288	WP_005297518.1	class D beta-lactamase	NF012161.0	class D beta-lactamase	2
GCA_036405675.1	Sediminibacterium sp.	HEY1019781.1	bla	subclass B1 metallo-beta-lactamase	core	AMR	AMR	BETA-LACTAM	BETA-LACTAM	HMM	268	266	83.83	61.43	223	WP_081048762.1	subclass B1 metallo-beta-lactamase	NF033088.2	subclass B1 metallo-beta-lactamase	2
GCA_036405675.1	Sediminibacterium sp.	HEY1020554.1	arr	NAD(+)--rifampin ADP-ribosyltransferase	core	AMR	AMR	RIFAMYCIN	RIFAMYCIN	HMM	136	137	92.7	59.84	127	WP_012695486.1	NAD(+)--rifampin ADP-ribosyltransferase	NF033144.1	NAD(+)--rifampin ADP-ribosyltransferase	2
GCA_036405695.1	Flavisolibacter sp.	HEY1022502.1	arr	NAD(+)--rifampin ADP-ribosyltransferase	core	AMR	AMR	RIFAMYCIN	RIFAMYCIN	HMM	126	137	77.37	61.32	106	WP_012695486.1	NAD(+)--rifampin ADP-ribosyltransferase	NF033144.1	NAD(+)--rifampin ADP-ribosyltransferase	2
GCA_036405695.1	Flavisolibacter sp.	HEY1022846.1	bla	subclass B1 metallo-beta-lactamase	core	AMR	AMR	BETA-LACTAM	BETA-LACTAM	HMM	243	247	96.36	48.12	239	WP_013992183.1	subclass B1 metallo-beta-lactamase	NF033088.2	subclass B1 metallo-beta-lactamase	2
GCA_036406055.1	Flavipsychrobacter sp.	HEY1031762.1	bla	class A beta-lactamase	core	AMR	AMR	BETA-LACTAM	BETA-LACTAM	HMM	312	319	96.55	40.13	309	WP_063842272.1	class A beta-lactamase	NF033103.1	class A beta-lactamase	2
GCA_036406055.1	Flavipsychrobacter sp.	HEY1032823.1	bla	subclass B3 metallo-beta-lactamase	core	AMR	AMR	BETA-LACTAM	BETA-LACTAM	HMM	278	289	91.7	67.92	265	WP_041884311.1	subclass B3 metallo-beta-lactamase	NF033105.1	subclass B3 metallo-beta-lactamase	2
GCA_036406055.1	Flavipsychrobacter sp.	HEY1032868.1	arr	NAD(+)--rifampin ADP-ribosyltransferase	core	AMR	AMR	RIFAMYCIN	RIFAMYCIN	HMM	141	150	94.67	56.34	142	WP_063842214.1	NAD(+)--rifampin ADP-ribosyltransferase	NF033144.1	NAD(+)--rifampin ADP-ribosyltransferase	3
GCA_036404975.1	Chitinophagaceae bacterium	HEY1114226.1	arr	NAD(+)--rifampin ADP-ribosyltransferase	core	AMR	AMR	RIFAMYCIN	RIFAMYCIN	HMM	176	137	94.16	63.57	129	WP_012695486.1	NAD(+)--rifampin ADP-ribosyltransferase	NF033144.1	NAD(+)--rifampin ADP-ribosyltransferase	3
GCA_036404975.1	Chitinophagaceae bacterium	HEY1115620.1	arsN2	arsenic resistance N-acetyltransferase ArsN2	plus	STRESS	METAL	ARSENIC	ARSENIC	HMM	148	144	97.92	38.3	141	KTT96020.1	arsenic resistance N-acetyltransferase ArsN2	NF040501.1	arsenic resistance N-acetyltransferase ArsN2	3
GCA_036404595.1	Chitinophaga sp.	HEY1164975.1	blaOXA	class D beta-lactamase	core	AMR	AMR	BETA-LACTAM	BETA-LACTAM	HMM	269	289	83.04	43.8	242	WP_075071939.1	class D beta-lactamase	NF012161.0	class D beta-lactamase	1
GCA_036404595.1	Chitinophaga sp.	HEY1166773.1	bla	subclass B3 metallo-beta-lactamase	core	AMR	AMR	BETA-LACTAM	BETA-LACTAM	HMM	296	289	99.65	60.42	288	WP_041884311.1	subclass B3 metallo-beta-lactamase	NF033105.1	subclass B3 metallo-beta-lactamase	2
GCA_036404595.1	Chitinophaga sp.	HEY1167095.1	bla	subclass B1 metallo-beta-lactamase	core	AMR	AMR	BETA-LACTAM	BETA-LACTAM	HMM	234	246	94.72	45.49	233	WP_318245543.1	subclass B1 metallo-beta-lactamase	NF033088.2	subclass B1 metallo-beta-lactamase	2
GCA_036404735.1	Niastella sp.	HEY1200461.1	bla	subclass B3 metallo-beta-lactamase	core	AMR	AMR	BETA-LACTAM	BETA-LACTAM	HMM	289	289	97.58	58.16	282	WP_041884311.1	subclass B3 metallo-beta-lactamase	NF033105.1	subclass B3 metallo-beta-lactamase	1
GCA_036496825.1	Puia sp.	HEY2348357.1	bla	BlaB/IND/MUS family subclass B1 metallo-beta-lactamase	core	AMR	AMR	BETA-LACTAM	BETA-LACTAM	HMM	243	248	97.98	56.38	243	WP_012025466.1	BlaB/IND/MUS family subclass B1 metallo-beta-lactamase	NF012146.1	BlaB/IND/MUS family subclass B1 metallo-beta-lactamase	1
GCA_036495145.1	Puia sp.	HEY2648441.1	bla	BlaB/IND/MUS family subclass B1 metallo-beta-lactamase	core	AMR	AMR	BETA-LACTAM	BETA-LACTAM	HMM	226	248	87.5	58.99	217	WP_012025466.1	BlaB/IND/MUS family subclass B1 metallo-beta-lactamase	NF012146.1	BlaB/IND/MUS family subclass B1 metallo-beta-lactamase	1
GCA_036495145.1	Puia sp.	HEY2649447.1	arr	NAD(+)--rifampin ADP-ribosyltransferase	core	AMR	AMR	RIFAMYCIN	RIFAMYCIN	HMM	266	150	82.67	53.23	124	WP_033959319.1	NAD(+)--rifampin ADP-ribosyltransferase	NF033144.1	NAD(+)--rifampin ADP-ribosyltransferase	3
GCA_036494225.1	Parafilimonas sp.	HEY2726274.1	bla	subclass B3 metallo-beta-lactamase	core	AMR	AMR	BETA-LACTAM	BETA-LACTAM	HMM	293	290	97.93	60.56	284	WP_078793281.1	subclass B3 metallo-beta-lactamase	NF033105.1	subclass B3 metallo-beta-lactamase	3
GCA_036500545.1	Puia sp.	HEY4063613.1	bla	subclass B3 metallo-beta-lactamase	core	AMR	AMR	BETA-LACTAM	BETA-LACTAM	HMM	296	293	94.2	62.28	281	WP_063842707.1	subclass B3 metallo-beta-lactamase	NF033105.1	subclass B3 metallo-beta-lactamase	3
GCA_036500545.1	Puia sp.	HEY4063911.1	bla	class A beta-lactamase, subclass A2	core	AMR	AMR	BETA-LACTAM	BETA-LACTAM	HMM	307	303	93.73	46.13	284	WP_041881964.1	class A beta-lactamase, subclass A2	NF012099.1	class A beta-lactamase, subclass A2	2
GCA_036500295.1	Puia sp.	HEY4110190.1	bla	class A beta-lactamase	core	AMR	AMR	BETA-LACTAM	BETA-LACTAM	HMM	326	301	95.68	47.47	297	WP_032494759.1	class A beta-lactamase	NF033103.1	class A beta-lactamase	2
GCA_036500295.1	Puia sp.	HEY4110771.1	bla	subclass B3 metallo-beta-lactamase	core	AMR	AMR	BETA-LACTAM	BETA-LACTAM	HMM	292	289	96.89	57.86	280	WP_041884311.1	subclass B3 metallo-beta-lactamase	NF033105.1	subclass B3 metallo-beta-lactamase	1
GCA_036500065.1	Chitinophagaceae bacterium	HEY4148941.1	bla	subclass B1 metallo-beta-lactamase	core	AMR	AMR	BETA-LACTAM	BETA-LACTAM	HMM	455	241	100	47.52	242	WP_148044405.1	subclass B1 metallo-beta-lactamase	NF033088.2	subclass B1 metallo-beta-lactamase	5
GCA_036499285.1	Puia sp.	HEY4287852.1	bla	BlaB/IND/MUS family subclass B1 metallo-beta-lactamase	core	AMR	AMR	BETA-LACTAM	BETA-LACTAM	HMM	244	248	94.35	50.42	236	WP_012025466.1	BlaB/IND/MUS family subclass B1 metallo-beta-lactamase	NF012146.1	BlaB/IND/MUS family subclass B1 metallo-beta-lactamase	5
GCA_036513235.1	Puia sp.	HEY4874252.1	bla	class A beta-lactamase, subclass A2	core	AMR	AMR	BETA-LACTAM	BETA-LACTAM	HMM	301	304	100	61.84	304	WP_154469535.1	class A beta-lactamase, subclass A2	NF012099.1	class A beta-lactamase, subclass A2	5
GCA_036512435.1	Puia sp.	HEY4934965.1	blaOXA	class D beta-lactamase	core	AMR	AMR	BETA-LACTAM	BETA-LACTAM	HMM	268	269	95.17	37.98	258	WP_242934118.1	class D beta-lactamase	NF012161.0	class D beta-lactamase	5
GCA_036512575.1	Puia sp.	HEY4965184.1	bla	BlaB/IND/MUS family subclass B1 metallo-beta-lactamase	core	AMR	AMR	BETA-LACTAM	BETA-LACTAM	HMM	243	241	98.34	60.08	238	WP_148044405.1	BlaB/IND/MUS family subclass B1 metallo-beta-lactamase	NF012146.1	BlaB/IND/MUS family subclass B1 metallo-beta-lactamase	5
GCA_036512575.1	Puia sp.	HEY4966465.1	blaOXA	class D beta-lactamase	core	AMR	AMR	BETA-LACTAM	BETA-LACTAM	HMM	268	269	97.4	39.77	264	WP_242934118.1	class D beta-lactamase	NF012161.0	class D beta-lactamase	1
GCA_036509585.1	Hanamia sp.	HEY5367589.1	bla	class A beta-lactamase, subclass A2	core	AMR	AMR	BETA-LACTAM	BETA-LACTAM	HMM	298	303	96.04	58.9	292	WP_041881964.1	class A beta-lactamase, subclass A2	NF012099.1	class A beta-lactamase, subclass A2	2
GCA_036509585.1	Hanamia sp.	HEY5368190.1	bla	subclass B3 metallo-beta-lactamase	core	AMR	AMR	BETA-LACTAM	BETA-LACTAM	HMM	291	293	93.17	66.3	273	WP_063842707.1	subclass B3 metallo-beta-lactamase	NF033105.1	subclass B3 metallo-beta-lactamase	2
GCA_036509695.1	Hanamia sp.	HEY5390789.1	arr	NAD(+)--rifampin ADP-ribosyltransferase	core	AMR	AMR	RIFAMYCIN	RIFAMYCIN	HMM	135	137	96.35	61.36	132	WP_012695486.1	NAD(+)--rifampin ADP-ribosyltransferase	NF033144.1	NAD(+)--rifampin ADP-ribosyltransferase	5
GCA_036509695.1	Hanamia sp.	HEY5390987.1	bla	subclass B1 metallo-beta-lactamase	core	AMR	AMR	BETA-LACTAM	BETA-LACTAM	HMM	216	246	87.4	49.07	216	WP_318245543.1	subclass B1 metallo-beta-lactamase	NF033088.2	subclass B1 metallo-beta-lactamase	5
GCA_036509695.1	Hanamia sp.	HEY5392985.1	bla	subclass B3 metallo-beta-lactamase	core	AMR	AMR	BETA-LACTAM	BETA-LACTAM	HMM	291	293	95.9	64.77	281	WP_063842707.1	subclass B3 metallo-beta-lactamase	NF033105.1	subclass B3 metallo-beta-lactamase	5
GCA_036509235.1	Ginsengibacter sp.	HEY5408656.1	blaOXA	class D beta-lactamase	core	AMR	AMR	BETA-LACTAM	BETA-LACTAM	HMM	296	274	99.64	38.27	277	WP_004295324.1	class D beta-lactamase	NF012161.0	class D beta-lactamase	5
GCA_036509335.1	Hanamia sp.	HEY5461794.1	arr	NAD(+)--rifampin ADP-ribosyltransferase	core	AMR	AMR	RIFAMYCIN	RIFAMYCIN	HMM	148	137	94.89	60	130	WP_012695486.1	NAD(+)--rifampin ADP-ribosyltransferase	NF033144.1	NAD(+)--rifampin ADP-ribosyltransferase	5
GCA_036525275.1	Chitinophagaceae bacterium	HEY5772998.1	bla	subclass B3 metallo-beta-lactamase	core	AMR	AMR	BETA-LACTAM	BETA-LACTAM	HMM	280	293	95.22	67.74	279	WP_063842707.1	subclass B3 metallo-beta-lactamase	NF033105.1	subclass B3 metallo-beta-lactamase	3
GCA_036518515.1	Puia sp.	HEY6902516.1	bla	subclass B3 metallo-beta-lactamase	core	AMR	AMR	BETA-LACTAM	BETA-LACTAM	HMM	290	289	99.31	56.45	287	WP_041884311.1	subclass B3 metallo-beta-lactamase	NF033105.1	subclass B3 metallo-beta-lactamase	3
GCA_036518315.1	Flavisolibacter sp.	HEY6953835.1	arsN2	arsenic resistance N-acetyltransferase ArsN2	plus	STRESS	METAL	ARSENIC	ARSENIC	HMM	145	142	100	32.39	142	ABB05616.1	arsenic resistance N-acetyltransferase ArsN2	NF040501.1	arsenic resistance N-acetyltransferase ArsN2	3
GCA_036518315.1	Flavisolibacter sp.	HEY6954501.1	blaOXA	class D beta-lactamase	core	AMR	AMR	BETA-LACTAM	BETA-LACTAM	HMM	269	258	93.02	40.4	250	WP_004919358.1	class D beta-lactamase	NF012161.0	class D beta-lactamase	2
GCA_036558585.1	Chitinophagaceae bacterium	HEY6975817.1	bla	metallo-beta-lactamase	core	AMR	AMR	BETA-LACTAM	BETA-LACTAM	HMM	180	293	57.34	71.76	170	WP_063842707.1	metallo-beta-lactamase	NF012229.1	metallo-beta-lactamase	2
GCA_036562505.1	Parasegetibacter sp.	HEY8387097.1	arr	NAD(+)--rifampin ADP-ribosyltransferase	core	AMR	AMR	RIFAMYCIN	RIFAMYCIN	HMM	126	143	87.41	56	125	WP_063842202.1	NAD(+)--rifampin ADP-ribosyltransferase	NF033144.1	NAD(+)--rifampin ADP-ribosyltransferase	3
GCA_036562745.1	Flavihumibacter sp.	HEY8397627.1	bla	subclass B1 metallo-beta-lactamase	core	AMR	AMR	BETA-LACTAM	BETA-LACTAM	HMM	407	247	95.95	50	240	WP_013992183.1	subclass B1 metallo-beta-lactamase	NF033088.2	subclass B1 metallo-beta-lactamase	3
GCA_036562745.1	Flavihumibacter sp.	HEY8398549.1	arr	NAD(+)--rifampin ADP-ribosyltransferase	core	AMR	AMR	RIFAMYCIN	RIFAMYCIN	HMM	136	143	92.31	62.12	132	WP_063842202.1	NAD(+)--rifampin ADP-ribosyltransferase	NF033144.1	NAD(+)--rifampin ADP-ribosyltransferase	3
GCA_036565505.1	Hanamia sp.	HEY8658433.1	blaOXA	class D beta-lactamase	core	AMR	AMR	BETA-LACTAM	BETA-LACTAM	HMM	270	274	100	38.41	276	WP_004295324.1	class D beta-lactamase	NF012161.0	class D beta-lactamase	2
GCA_036564845.1	Chitinophagaceae bacterium	HEY8688292.1	blaOXA	class D beta-lactamase	core	AMR	AMR	BETA-LACTAM	BETA-LACTAM	HMM	272	269	99.26	36.86	274	WP_063861316.1	class D beta-lactamase	NF012161.0	class D beta-lactamase	2
GCA_036564805.1	Puia sp.	HEY8734064.1	bla	class A beta-lactamase	core	AMR	AMR	BETA-LACTAM	BETA-LACTAM	HMM	249	303	79.87	52.26	243	WP_041881964.1	class A beta-lactamase	NF033103.1	class A beta-lactamase	1
GCA_036569125.1	Chitinophaga sp.	HEY8916591.1	bla	subclass B1 metallo-beta-lactamase	core	AMR	AMR	BETA-LACTAM	BETA-LACTAM	HMM	235	249	93.17	47.84	232	WP_041258349.1	subclass B1 metallo-beta-lactamase	NF033088.2	subclass B1 metallo-beta-lactamase	3
GCA_036569125.1	Chitinophaga sp.	HEY8917090.1	blaOXA	class D beta-lactamase	core	AMR	AMR	BETA-LACTAM	BETA-LACTAM	HMM	266	289	83.04	43.8	242	WP_075071939.1	class D beta-lactamase	NF012161.0	class D beta-lactamase	3
GCA_036569125.1	Chitinophaga sp.	HEY8920650.1	aadS	AadS family aminoglycoside 6-adenylyltransferase	core	AMR	AMR	AMINOGLYCOSIDE	STREPTOMYCIN	HMM	288	287	98.95	57.04	284	WP_003013318.1	AadS family aminoglycoside 6-adenylyltransferase	NF033387.1	AadS family aminoglycoside 6-adenylyltransferase	3
GCA_036569125.1	Chitinophaga sp.	HEY8920760.1	bla	class A beta-lactamase, subclass A2	core	AMR	AMR	BETA-LACTAM	BETA-LACTAM	HMM	302	303	93.73	52.78	288	WP_041881964.1	class A beta-lactamase, subclass A2	NF012099.1	class A beta-lactamase, subclass A2	2
GCA_036569185.1	Chitinophaga sp.	HEY8956154.1	blaOXA	class D beta-lactamase	core	AMR	AMR	BETA-LACTAM	BETA-LACTAM	HMM	267	248	98.39	38.76	258	WP_109545084.1	class D beta-lactamase	NF012161.0	class D beta-lactamase	2
GCA_036569185.1	Chitinophaga sp.	HEY8956252.1	arr	NAD(+)--rifampin ADP-ribosyltransferase	core	AMR	AMR	RIFAMYCIN	RIFAMYCIN	HMM	141	150	87.33	58.78	131	WP_000237816.1	NAD(+)--rifampin ADP-ribosyltransferase	NF033144.1	NAD(+)--rifampin ADP-ribosyltransferase	2
GCA_036569185.1	Chitinophaga sp.	HEY8958650.1	bla	class A beta-lactamase	core	AMR	AMR	BETA-LACTAM	BETA-LACTAM	HMM	299	319	86.52	48.38	277	WP_063842272.1	class A beta-lactamase	NF033103.1	class A beta-lactamase	2
GCA_036569185.1	Chitinophaga sp.	HEY8958671.1	bla	subclass B1 metallo-beta-lactamase	core	AMR	AMR	BETA-LACTAM	BETA-LACTAM	HMM	253	253	99.21	70.52	251	WP_119059468.1	subclass B1 metallo-beta-lactamase	NF033088.2	subclass B1 metallo-beta-lactamase	2
GCA_036569245.1	Puia sp.	HEY8970898.1	bla	subclass B3 metallo-beta-lactamase	core	AMR	AMR	BETA-LACTAM	BETA-LACTAM	HMM	294	289	99.31	57.49	287	WP_041884311.1	subclass B3 metallo-beta-lactamase	NF033105.1	subclass B3 metallo-beta-lactamase	2
GCA_036568285.1	Flavipsychrobacter sp.	HEY9176977.1	bla	subclass B1 metallo-beta-lactamase	core	AMR	AMR	BETA-LACTAM	BETA-LACTAM	HMM	248	241	99.59	37.14	245	WP_148044405.1	subclass B1 metallo-beta-lactamase	NF033088.2	subclass B1 metallo-beta-lactamase	2
GCA_036568285.1	Flavipsychrobacter sp.	HEY9178223.1	arr	NAD(+)--rifampin ADP-ribosyltransferase	core	AMR	AMR	RIFAMYCIN	RIFAMYCIN	HMM	247	150	86	51.94	129	WP_033959319.1	NAD(+)--rifampin ADP-ribosyltransferase	NF033144.1	NAD(+)--rifampin ADP-ribosyltransferase	2
GCA_036566945.1	Chitinophaga sp.	HEY9257950.1	bla	subclass B1 metallo-beta-lactamase	core	AMR	AMR	BETA-LACTAM	BETA-LACTAM	HMM	238	237	98.73	42.92	240	WP_063864592.1	subclass B1 metallo-beta-lactamase	NF033088.2	subclass B1 metallo-beta-lactamase	3
GCA_036566945.1	Chitinophaga sp.	HEY9261635.1	bla	class A beta-lactamase, subclass A2	core	AMR	AMR	BETA-LACTAM	BETA-LACTAM	HMM	300	319	84.33	49.63	272	WP_063842272.1	class A beta-lactamase, subclass A2	NF012099.1	class A beta-lactamase, subclass A2	3
GCA_036566285.1	Hanamia sp.	HEY9340335.1	blaOXA	class D beta-lactamase	core	AMR	AMR	BETA-LACTAM	BETA-LACTAM	HMM	270	274	100	40.29	278	WP_004295324.1	class D beta-lactamase	NF012161.0	class D beta-lactamase	3
GCA_035251455.1	Chitinophagaceae bacterium	HJS55161.1	bla	subclass B3 metallo-beta-lactamase	core	AMR	AMR	BETA-LACTAM	BETA-LACTAM	HMM	294	289	99.65	63.19	288	WP_041884311.1	subclass B3 metallo-beta-lactamase	NF033105.1	subclass B3 metallo-beta-lactamase	2
GCA_035253145.1	Chitinophaga sp.	HJT74811.1	bla	class A beta-lactamase, subclass A2	core	AMR	AMR	BETA-LACTAM	BETA-LACTAM	HMM	254	301	84.05	54.15	253	WP_032494759.1	class A beta-lactamase, subclass A2	NF012099.1	class A beta-lactamase, subclass A2	2
GCA_035254545.1	Sediminibacterium sp.	HJV19322.1	bla	class A beta-lactamase, subclass A2	core	AMR	AMR	BETA-LACTAM	BETA-LACTAM	HMM	304	304	98.68	59.67	300	WP_064964607.1	class A beta-lactamase, subclass A2	NF012099.1	class A beta-lactamase, subclass A2	3
GCA_035255425.1	Flavisolibacter sp.	HJW15509.1	arsN2	arsenic resistance N-acetyltransferase ArsN2	plus	STRESS	METAL	ARSENIC	ARSENIC	HMM	150	147	93.88	34.78	138	UIK15784.1	arsenic resistance N-acetyltransferase ArsN2	NF040501.1	arsenic resistance N-acetyltransferase ArsN2	3
GCA_035255425.1	Flavisolibacter sp.	HJW17480.1	blaOXA	class D beta-lactamase	core	AMR	AMR	BETA-LACTAM	BETA-LACTAM	HMM	270	289	96.19	37.94	282	WP_075071939.1	class D beta-lactamase	NF012161.0	class D beta-lactamase	3
GCA_035273445.1	Chitinophagaceae bacterium	HKO78987.1	bla	BlaB/IND/MUS family subclass B1 metallo-beta-lactamase	core	AMR	AMR	BETA-LACTAM	BETA-LACTAM	HMM	221	248	88.71	60.91	220	WP_012025466.1	BlaB/IND/MUS family subclass B1 metallo-beta-lactamase	NF012146.1	BlaB/IND/MUS family subclass B1 metallo-beta-lactamase	1
GCA_035273445.1	Chitinophagaceae bacterium	HKO79083.1	blaOXA	class D beta-lactamase	core	AMR	AMR	BETA-LACTAM	BETA-LACTAM	HMM	271	258	93.8	41.57	255	WP_004919358.1	class D beta-lactamase	NF012161.0	class D beta-lactamase	1
GCA_035286305.1	Puia sp.	HLA60109.1	bla	BlaB/IND/MUS family subclass B1 metallo-beta-lactamase	core	AMR	AMR	BETA-LACTAM	BETA-LACTAM	HMM	247	241	100	56.56	244	WP_148044405.1	BlaB/IND/MUS family subclass B1 metallo-beta-lactamase	NF012146.1	BlaB/IND/MUS family subclass B1 metallo-beta-lactamase	1
GCA_035290425.1	Sediminibacterium sp.	HLD52460.1	bla	BlaB/IND/MUS family subclass B1 metallo-beta-lactamase	core	AMR	AMR	BETA-LACTAM	BETA-LACTAM	HMM	343	241	98.34	52.1	238	WP_148044405.1	BlaB/IND/MUS family subclass B1 metallo-beta-lactamase	NF012146.1	BlaB/IND/MUS family subclass B1 metallo-beta-lactamase	1
GCA_035292525.1	Chitinophagaceae bacterium	HLF46056.1	blaOXA	class D beta-lactamase	core	AMR	AMR	BETA-LACTAM	BETA-LACTAM	HMM	269	274	100	38.41	276	WP_014053563.1	class D beta-lactamase	NF012161.0	class D beta-lactamase	1
GCA_035294825.1	Puia sp.	HLI94096.1	arsN2	arsenic resistance N-acetyltransferase ArsN2	plus	STRESS	METAL	ARSENIC	ARSENIC	HMM	154	164	76.83	44.44	126	ABU58394.1	arsenic resistance N-acetyltransferase ArsN2	NF040501.1	arsenic resistance N-acetyltransferase ArsN2	1
GCA_035295505.1	Puia sp.	HLK28448.1	bla	BlaB/IND/MUS family subclass B1 metallo-beta-lactamase	core	AMR	AMR	BETA-LACTAM	BETA-LACTAM	HMM	237	248	94.76	53.62	235	WP_012025466.1	BlaB/IND/MUS family subclass B1 metallo-beta-lactamase	NF012146.1	BlaB/IND/MUS family subclass B1 metallo-beta-lactamase	1
GCA_035295505.1	Puia sp.	HLK28847.1	blaOXA	class D beta-lactamase	core	AMR	AMR	BETA-LACTAM	BETA-LACTAM	HMM	270	258	96.9	40	260	WP_004919358.1	class D beta-lactamase	NF012161.0	class D beta-lactamase	1
GCA_035295505.1	Puia sp.	HLK29981.1	arsN2	arsenic resistance N-acetyltransferase ArsN2	plus	STRESS	METAL	ARSENIC	ARSENIC	HMM	281	139	94.24	49.62	131	CAB14519.1	arsenic resistance N-acetyltransferase ArsN2	NF040501.1	arsenic resistance N-acetyltransferase ArsN2	1
GCA_035298625.1	Lacibacter sp.	HLO37425.1	bla	subclass B1 metallo-beta-lactamase	core	AMR	AMR	BETA-LACTAM	BETA-LACTAM	HMM	208	248	83.47	56.04	207	WP_012025466.1	subclass B1 metallo-beta-lactamase	NF033088.2	subclass B1 metallo-beta-lactamase	6
GCA_035298625.1	Lacibacter sp.	HLO39260.1	blaOXA	class D beta-lactamase	core	AMR	AMR	BETA-LACTAM	BETA-LACTAM	HMM	310	258	94.96	38.1	252	WP_004919358.1	class D beta-lactamase	NF012161.0	class D beta-lactamase	6
GCA_035299045.1	Flavipsychrobacter sp.	HLO69271.1	bla	class A beta-lactamase	core	AMR	AMR	BETA-LACTAM	BETA-LACTAM	HMM	306	301	94.02	38.87	283	WP_032494759.1	class A beta-lactamase	NF033103.1	class A beta-lactamase	6
GCA_035299045.1	Flavipsychrobacter sp.	HLO69837.1	arr	NAD(+)--rifampin ADP-ribosyltransferase	core	AMR	AMR	RIFAMYCIN	RIFAMYCIN	HMM	247	143	82.52	55.08	118	WP_063842202.1	NAD(+)--rifampin ADP-ribosyltransferase	NF033144.1	NAD(+)--rifampin ADP-ribosyltransferase	6
GCA_035298945.1	Chitinophagaceae bacterium	HLO79537.1	bla	subclass B1 metallo-beta-lactamase	core	AMR	AMR	BETA-LACTAM	BETA-LACTAM	HMM	215	253	84.58	72.43	214	WP_119059468.1	subclass B1 metallo-beta-lactamase	NF033088.2	subclass B1 metallo-beta-lactamase	6
GCA_035298945.1	Chitinophagaceae bacterium	HLO83326.1	blaOXA	class D beta-lactamase	core	AMR	AMR	BETA-LACTAM	BETA-LACTAM	HMM	268	267	99.63	38.89	270	WP_032492122.1	class D beta-lactamase	NF012161.0	class D beta-lactamase	6
GCA_035299325.1	Lacibacter sp.	HLP35633.1	bla	subclass B1 metallo-beta-lactamase	core	AMR	AMR	BETA-LACTAM	BETA-LACTAM	HMM	252	252	100	65.08	252	WP_202272142.1	subclass B1 metallo-beta-lactamase	NF033088.2	subclass B1 metallo-beta-lactamase	6
GCA_035299325.1	Lacibacter sp.	HLP37994.1	arr	NAD(+)--rifampin ADP-ribosyltransferase	core	AMR	AMR	RIFAMYCIN	RIFAMYCIN	HMM	146	137	97.08	57.14	133	WP_012695486.1	NAD(+)--rifampin ADP-ribosyltransferase	NF033144.1	NAD(+)--rifampin ADP-ribosyltransferase	6
GCA_035299325.1	Lacibacter sp.	HLP38965.1	bla	class A beta-lactamase, subclass A2	core	AMR	AMR	BETA-LACTAM	BETA-LACTAM	HMM	303	304	99.34	79.8	302	WP_154469535.1	class A beta-lactamase, subclass A2	NF012099.1	class A beta-lactamase, subclass A2	6
GCA_035301605.1	Chitinophagaceae bacterium	HLR36572.1	bla	class A beta-lactamase, subclass A2	core	AMR	AMR	BETA-LACTAM	BETA-LACTAM	HMM	299	304	98.68	50	300	WP_064964607.1	class A beta-lactamase, subclass A2	NF012099.1	class A beta-lactamase, subclass A2	6
GCA_035308845.1	Puia sp.	HLX91665.1	blaOXA	class D beta-lactamase	core	AMR	AMR	BETA-LACTAM	BETA-LACTAM	HMM	287	274	99.27	38.33	287	WP_001022756.1	class D beta-lactamase	NF012161.0	class D beta-lactamase	6
GCA_035308805.1	Puia sp.	HLY68136.1	bla	class A beta-lactamase, subclass A2	core	AMR	AMR	BETA-LACTAM	BETA-LACTAM	HMM	308	304	98.36	57.53	299	WP_154469535.1	class A beta-lactamase, subclass A2	NF012099.1	class A beta-lactamase, subclass A2	6
GCA_035308805.1	Puia sp.	HLY68959.1	blaOXA	class D beta-lactamase	core	AMR	AMR	BETA-LACTAM	BETA-LACTAM	HMM	270	273	97.44	39.71	272	WP_005404206.1	class D beta-lactamase	NF012161.0	class D beta-lactamase	2
GCA_035308805.1	Puia sp.	HLY70247.1	bla	BlaB/IND/MUS family subclass B1 metallo-beta-lactamase	core	AMR	AMR	BETA-LACTAM	BETA-LACTAM	HMM	244	241	97.1	56.17	235	WP_148044405.1	BlaB/IND/MUS family subclass B1 metallo-beta-lactamase	NF012146.1	BlaB/IND/MUS family subclass B1 metallo-beta-lactamase	2
GCA_035309365.1	Puia sp.	HLZ89985.1	bla	class A beta-lactamase	core	AMR	AMR	BETA-LACTAM	BETA-LACTAM	HMM	303	303	97.69	41.55	296	WP_041881964.1	class A beta-lactamase	NF033103.1	class A beta-lactamase	6
GCA_035313245.1	Ferruginibacter sp.	HMC99908.1	blaOXA	class D beta-lactamase	core	AMR	AMR	BETA-LACTAM	BETA-LACTAM	HMM	271	267	91.76	41.27	252	WP_003235647.1	class D beta-lactamase	NF012161.0	class D beta-lactamase	6
GCA_035316465.1	Flavitalea sp.	HMF70807.1	bla	subclass B3 metallo-beta-lactamase	core	AMR	AMR	BETA-LACTAM	BETA-LACTAM	HMM	292	289	99.65	73.26	288	WP_041884311.1	subclass B3 metallo-beta-lactamase	NF033105.1	subclass B3 metallo-beta-lactamase	6
GCA_035317105.1	Ferruginibacter sp.	HMG83430.1	blaOXA	class D beta-lactamase	core	AMR	AMR	BETA-LACTAM	BETA-LACTAM	HMM	272	274	99.64	39.49	276	WP_004295324.1	class D beta-lactamase	NF012161.0	class D beta-lactamase	6
GCA_035317105.1	Ferruginibacter sp.	HMG83971.1	arr	NAD(+)--rifampin ADP-ribosyltransferase	core	AMR	AMR	RIFAMYCIN	RIFAMYCIN	HMM	145	150	82.67	54.03	124	WP_000237816.1	NAD(+)--rifampin ADP-ribosyltransferase	NF033144.1	NAD(+)--rifampin ADP-ribosyltransferase	6
GCA_035317125.1	Puia sp.	HMH21490.1	bla	subclass B3 metallo-beta-lactamase	core	AMR	AMR	BETA-LACTAM	BETA-LACTAM	HMM	294	293	94.2	61.92	281	WP_063842707.1	subclass B3 metallo-beta-lactamase	NF033105.1	subclass B3 metallo-beta-lactamase	6
GCA_035317445.1	Puia sp.	HMH32063.1	blaOXA	class D beta-lactamase	core	AMR	AMR	BETA-LACTAM	BETA-LACTAM	HMM	271	279	98.21	37.99	279	WP_231869624.1	class D beta-lactamase	NF012161.0	class D beta-lactamase	3
GCA_035317895.1	Puia sp.	HMI62208.1	bla	class A beta-lactamase	core	AMR	AMR	BETA-LACTAM	BETA-LACTAM	HMM	299	301	97.34	44.37	293	WP_032494759.1	class A beta-lactamase	NF033103.1	class A beta-lactamase	3
GCA_035318345.1	Ferruginibacter sp.	HMI78167.1	blaOXA	class D beta-lactamase	core	AMR	AMR	BETA-LACTAM	BETA-LACTAM	HMM	278	289	98.27	35.93	295	WP_075071939.1	class D beta-lactamase	NF012161.0	class D beta-lactamase	3
GCA_035318345.1	Ferruginibacter sp.	HMI79429.1	arr	NAD(+)--rifampin ADP-ribosyltransferase	core	AMR	AMR	RIFAMYCIN	RIFAMYCIN	HMM	225	150	74.67	55.36	112	WP_033959319.1	NAD(+)--rifampin ADP-ribosyltransferase	NF033144.1	NAD(+)--rifampin ADP-ribosyltransferase	3
GCA_035318485.1	Ferruginibacter sp.	HMJ46043.1	blaOXA	class D beta-lactamase	core	AMR	AMR	BETA-LACTAM	BETA-LACTAM	HMM	271	274	100	37.91	277	WP_014053563.1	class D beta-lactamase	NF012161.0	class D beta-lactamase	3
GCA_035318485.1	Ferruginibacter sp.	HMJ46443.1	arr	NAD(+)--rifampin ADP-ribosyltransferase	core	AMR	AMR	RIFAMYCIN	RIFAMYCIN	HMM	148	137	94.89	57.69	130	WP_012695486.1	NAD(+)--rifampin ADP-ribosyltransferase	NF033144.1	NAD(+)--rifampin ADP-ribosyltransferase	3
GCA_035318485.1	Ferruginibacter sp.	HMJ47783.1	blaOXA	class D beta-lactamase	core	AMR	AMR	BETA-LACTAM	BETA-LACTAM	HMM	270	274	99.64	37.63	279	WP_128268242.1	class D beta-lactamase	NF012161.0	class D beta-lactamase	3
GCA_035318685.1	Ferruginibacter sp.	HMK03554.1	arsN2	arsenic resistance N-acetyltransferase ArsN2	plus	STRESS	METAL	ARSENIC	ARSENIC	HMM	150	147	85.03	37.3	126	ABG05788.1	arsenic resistance N-acetyltransferase ArsN2	NF040501.1	arsenic resistance N-acetyltransferase ArsN2	3
GCA_035318685.1	Ferruginibacter sp.	HMK03937.1	blaOXA	class D beta-lactamase	core	AMR	AMR	BETA-LACTAM	BETA-LACTAM	HMM	276	267	95.13	39.33	267	WP_003235647.1	class D beta-lactamase	NF012161.0	class D beta-lactamase	3
GCA_035318685.1	Ferruginibacter sp.	HMK05798.1	bla	class A beta-lactamase, subclass A2	core	AMR	AMR	BETA-LACTAM	BETA-LACTAM	HMM	307	304	100	57.89	304	WP_154469535.1	class A beta-lactamase, subclass A2	NF012099.1	class A beta-lactamase, subclass A2	6
GCA_035318985.1	Chitinophagaceae bacterium	HMK20493.1	arr	NAD(+)--rifampin ADP-ribosyltransferase	core	AMR	AMR	RIFAMYCIN	RIFAMYCIN	HMM	247	150	90.67	47.79	136	WP_000237816.1	NAD(+)--rifampin ADP-ribosyltransferase	NF033144.1	NAD(+)--rifampin ADP-ribosyltransferase	6
GCA_035318845.1	Chitinophagaceae bacterium	HMK25269.1	arr	NAD(+)--rifampin ADP-ribosyltransferase	core	AMR	AMR	RIFAMYCIN	RIFAMYCIN	HMM	231	150	90.67	47.79	136	WP_000237816.1	NAD(+)--rifampin ADP-ribosyltransferase	NF033144.1	NAD(+)--rifampin ADP-ribosyltransferase	6
GCA_035318845.1	Chitinophagaceae bacterium	HMK26117.1	arsN1	arsinothricin resistance N-acetyltransferase ArsN1 family B	plus	STRESS	METAL	ARSENIC	ARSENIC	HMM	202	186	92.47	46.51	172	AAN67541.1	arsinothricin resistance N-acetyltransferase ArsN1 family B	NF040504.1	arsinothricin resistance N-acetyltransferase ArsN1 family B	6
GCA_035323545.1	Ferruginibacter sp.	HML58042.1	bla	BlaB/IND/MUS family subclass B1 metallo-beta-lactamase	core	AMR	AMR	BETA-LACTAM	BETA-LACTAM	HMM	243	241	97.93	55.04	238	WP_148044405.1	BlaB/IND/MUS family subclass B1 metallo-beta-lactamase	NF012146.1	BlaB/IND/MUS family subclass B1 metallo-beta-lactamase	6
GCA_035323545.1	Ferruginibacter sp.	HML58817.1	blaOXA	class D beta-lactamase	core	AMR	AMR	BETA-LACTAM	BETA-LACTAM	HMM	272	267	96.63	38.46	260	WP_032492122.1	class D beta-lactamase	NF012161.0	class D beta-lactamase	6
GCA_035325745.1	Chitinophagaceae bacterium	HMN33312.1	bla	class A beta-lactamase, subclass A2	core	AMR	AMR	BETA-LACTAM	BETA-LACTAM	HMM	301	304	98.36	59.2	299	WP_154469535.1	class A beta-lactamase, subclass A2	NF012099.1	class A beta-lactamase, subclass A2	1
GCA_035324495.1	Ferruginibacter sp.	HMO61032.1	bla	BlaB/IND/MUS family subclass B1 metallo-beta-lactamase	core	AMR	AMR	BETA-LACTAM	BETA-LACTAM	HMM	247	248	98.39	52.87	244	WP_012025466.1	BlaB/IND/MUS family subclass B1 metallo-beta-lactamase	NF012146.1	BlaB/IND/MUS family subclass B1 metallo-beta-lactamase	1
GCA_035324495.1	Ferruginibacter sp.	HMO61041.1	bla	metallo-beta-lactamase	core	AMR	AMR	BETA-LACTAM	BETA-LACTAM	HMM	185	246	67.07	57.83	166	WP_318245543.1	metallo-beta-lactamase	NF012229.1	metallo-beta-lactamase	3
GCA_035324495.1	Ferruginibacter sp.	HMO61362.1	arsN2	arsenic resistance N-acetyltransferase ArsN2	plus	STRESS	METAL	ARSENIC	ARSENIC	HMM	150	144	87.5	41.27	126	KTT96020.1	arsenic resistance N-acetyltransferase ArsN2	NF040501.1	arsenic resistance N-acetyltransferase ArsN2	3
GCA_035324495.1	Ferruginibacter sp.	HMO63036.1	blaOXA	class D beta-lactamase	core	AMR	AMR	BETA-LACTAM	BETA-LACTAM	HMM	285	258	93.8	42.29	253	WP_004919358.1	class D beta-lactamase	NF012161.0	class D beta-lactamase	3
GCA_035323905.1	Ferruginibacter sp.	HMP19429.1	arsN2	arsenic resistance N-acetyltransferase ArsN2	plus	STRESS	METAL	ARSENIC	ARSENIC	HMM	150	144	87.5	41.27	126	KTT96020.1	arsenic resistance N-acetyltransferase ArsN2	NF040501.1	arsenic resistance N-acetyltransferase ArsN2	2
GCA_035323905.1	Ferruginibacter sp.	HMP19749.1	bla	metallo-beta-lactamase	core	AMR	AMR	BETA-LACTAM	BETA-LACTAM	HMM	185	246	67.07	57.83	166	WP_318245543.1	metallo-beta-lactamase	NF012229.1	metallo-beta-lactamase	2
GCA_035323905.1	Ferruginibacter sp.	HMP19758.1	bla	BlaB/IND/MUS family subclass B1 metallo-beta-lactamase	core	AMR	AMR	BETA-LACTAM	BETA-LACTAM	HMM	247	248	98.39	52.87	244	WP_012025466.1	BlaB/IND/MUS family subclass B1 metallo-beta-lactamase	NF012146.1	BlaB/IND/MUS family subclass B1 metallo-beta-lactamase	4
GCA_035323905.1	Ferruginibacter sp.	HMP21045.1	blaOXA	class D beta-lactamase	core	AMR	AMR	BETA-LACTAM	BETA-LACTAM	HMM	285	258	93.8	42.29	253	WP_004919358.1	class D beta-lactamase	NF012161.0	class D beta-lactamase	4
GCA_035326385.1	Niabella sp.	HMR82196.1	bla	class A beta-lactamase, subclass A2	core	AMR	AMR	BETA-LACTAM	BETA-LACTAM	HMM	319	304	100	84.26	305	WP_154469535.1	class A beta-lactamase, subclass A2	NF012099.1	class A beta-lactamase, subclass A2	4
GCA_035326385.1	Niabella sp.	HMR82551.1	arr	NAD(+)--rifampin ADP-ribosyltransferase	core	AMR	AMR	RIFAMYCIN	RIFAMYCIN	HMM	148	137	94.16	56.59	129	WP_012695486.1	NAD(+)--rifampin ADP-ribosyltransferase	NF033144.1	NAD(+)--rifampin ADP-ribosyltransferase	4
GCA_035326305.1	Chitinophagaceae bacterium	HMR90808.1	arsN1	arsinothricin resistance N-acetyltransferase ArsN1 family B	plus	STRESS	METAL	ARSENIC	ARSENIC	HMM	188	186	95.16	43.82	178	AAN67541.1	arsinothricin resistance N-acetyltransferase ArsN1 family B	NF040504.1	arsinothricin resistance N-acetyltransferase ArsN1 family B	3
GCA_035326305.1	Chitinophagaceae bacterium	HMR91742.1	bla	subclass B1 metallo-beta-lactamase	core	AMR	AMR	BETA-LACTAM	BETA-LACTAM	HMM	252	253	96.84	66.12	245	WP_119059468.1	subclass B1 metallo-beta-lactamase	NF033088.2	subclass B1 metallo-beta-lactamase	3
GCA_035329225.1	Chitinophagaceae bacterium	HMT35876.1	arr	NAD(+)--rifampin ADP-ribosyltransferase	core	AMR	AMR	RIFAMYCIN	RIFAMYCIN	HMM	150	143	88.81	56.69	127	WP_063842202.1	NAD(+)--rifampin ADP-ribosyltransferase	NF033144.1	NAD(+)--rifampin ADP-ribosyltransferase	3
GCA_035328845.1	Chitinophagaceae bacterium	HMT74269.1	bla	subclass B1 metallo-beta-lactamase	core	AMR	AMR	BETA-LACTAM	BETA-LACTAM	HMM	252	253	96.05	69.55	243	WP_119059468.1	subclass B1 metallo-beta-lactamase	NF033088.2	subclass B1 metallo-beta-lactamase	1
GCA_035328425.1	Ferruginibacter sp.	HMT95644.1	bla	BlaB/IND/MUS family subclass B1 metallo-beta-lactamase	core	AMR	AMR	BETA-LACTAM	BETA-LACTAM	HMM	234	241	95.02	53.48	230	WP_148044405.1	BlaB/IND/MUS family subclass B1 metallo-beta-lactamase	NF012146.1	BlaB/IND/MUS family subclass B1 metallo-beta-lactamase	1
GCA_035328475.1	Ferruginibacter sp.	HMU08638.1	blaOXA	class D beta-lactamase	core	AMR	AMR	BETA-LACTAM	BETA-LACTAM	HMM	278	268	93.28	38.81	268	WP_003328240.1	class D beta-lactamase	NF012161.0	class D beta-lactamase	1
GCA_035328475.1	Ferruginibacter sp.	HMU09685.1	arsN2	arsenic resistance N-acetyltransferase ArsN2	plus	STRESS	METAL	ARSENIC	ARSENIC	HMM	149	147	85.03	36	125	ABG05788.1	arsenic resistance N-acetyltransferase ArsN2	NF040501.1	arsenic resistance N-acetyltransferase ArsN2	3
GCA_035328325.1	Ferruginibacter sp.	HMU23945.1	bla	BlaB/IND/MUS family subclass B1 metallo-beta-lactamase	core	AMR	AMR	BETA-LACTAM	BETA-LACTAM	HMM	234	241	95.02	53.48	230	WP_148044405.1	BlaB/IND/MUS family subclass B1 metallo-beta-lactamase	NF012146.1	BlaB/IND/MUS family subclass B1 metallo-beta-lactamase	3
GCA_035328345.1	Chitinophagaceae bacterium	HMU47383.1	bla	subclass B3 metallo-beta-lactamase	core	AMR	AMR	BETA-LACTAM	BETA-LACTAM	HMM	290	290	97.59	59.51	284	WP_063857696.1	subclass B3 metallo-beta-lactamase	NF033105.1	subclass B3 metallo-beta-lactamase	3
GCA_035328705.1	Chitinophagaceae bacterium	HMU57113.1	bla	subclass B1 metallo-beta-lactamase	core	AMR	AMR	BETA-LACTAM	BETA-LACTAM	HMM	234	253	90.91	70.43	230	WP_119059468.1	subclass B1 metallo-beta-lactamase	NF033088.2	subclass B1 metallo-beta-lactamase	1
GCA_035328705.1	Chitinophagaceae bacterium	HMU59975.1	erm	23S ribosomal RNA methyltransferase Erm	core	AMR	AMR	MACROLIDE	MACROLIDE	HMM	266	266	100	68.42	266	WP_006745469.1	23S ribosomal RNA methyltransferase Erm	NF000499.2	23S ribosomal RNA methyltransferase Erm	2
GCA_035331525.1	Ferruginibacter sp.	HMW26385.1	arsN2	arsenic resistance N-acetyltransferase ArsN2	plus	STRESS	METAL	ARSENIC	ARSENIC	HMM	148	144	94.44	36.76	136	KTT96020.1	arsenic resistance N-acetyltransferase ArsN2	NF040501.1	arsenic resistance N-acetyltransferase ArsN2	2
GCA_035330565.1	Ferruginibacter sp.	HMX36048.1	arsN2	arsenic resistance N-acetyltransferase ArsN2	plus	STRESS	METAL	ARSENIC	ARSENIC	HMM	148	144	94.44	36.76	136	KTT96020.1	arsenic resistance N-acetyltransferase ArsN2	NF040501.1	arsenic resistance N-acetyltransferase ArsN2	2
GCA_035330565.1	Ferruginibacter sp.	HMX37362.1	bla	BlaB/IND/MUS family subclass B1 metallo-beta-lactamase	core	AMR	AMR	BETA-LACTAM	BETA-LACTAM	HMM	207	241	84.65	55.88	204	WP_148044405.1	BlaB/IND/MUS family subclass B1 metallo-beta-lactamase	NF012146.1	BlaB/IND/MUS family subclass B1 metallo-beta-lactamase	2
GCA_035333965.1	Chitinophagaceae bacterium	HMX78156.1	bla	metallo-beta-lactamase	core	AMR	AMR	BETA-LACTAM	BETA-LACTAM	HMM	184	246	74.39	57.61	184	WP_318245543.1	metallo-beta-lactamase	NF012229.1	metallo-beta-lactamase	2
GCA_035334025.1	Ferruginibacter sp.	HMX78961.1	blaOXA	class D beta-lactamase	core	AMR	AMR	BETA-LACTAM	BETA-LACTAM	HMM	273	267	95.13	41.51	265	WP_003235647.1	class D beta-lactamase	NF012161.0	class D beta-lactamase	2
GCA_035334025.1	Ferruginibacter sp.	HMX80857.1	arsN2	arsenic resistance N-acetyltransferase ArsN2	plus	STRESS	METAL	ARSENIC	ARSENIC	HMM	148	144	94.44	36.76	136	KTT96020.1	arsenic resistance N-acetyltransferase ArsN2	NF040501.1	arsenic resistance N-acetyltransferase ArsN2	2
GCA_035334025.1	Ferruginibacter sp.	HMX81383.1	bla	BlaB/IND/MUS family subclass B1 metallo-beta-lactamase	core	AMR	AMR	BETA-LACTAM	BETA-LACTAM	HMM	245	248	94.76	54.47	235	WP_012025466.1	BlaB/IND/MUS family subclass B1 metallo-beta-lactamase	NF012146.1	BlaB/IND/MUS family subclass B1 metallo-beta-lactamase	2
GCA_035333105.1	Chitinophagaceae bacterium	HMZ46604.1	blaOXA	class D beta-lactamase	core	AMR	AMR	BETA-LACTAM	BETA-LACTAM	HMM	269	275	100	39.01	282	WP_274293089.1	class D beta-lactamase	NF012161.0	class D beta-lactamase	1
GCA_035333025.1	Ferruginibacter sp.	HMZ99700.1	blaOXA	class D beta-lactamase	core	AMR	AMR	BETA-LACTAM	BETA-LACTAM	HMM	273	267	95.13	41.51	265	WP_003235647.1	class D beta-lactamase	NF012161.0	class D beta-lactamase	3
GCA_035333025.1	Ferruginibacter sp.	HNA00734.1	arsN2	arsenic resistance N-acetyltransferase ArsN2	plus	STRESS	METAL	ARSENIC	ARSENIC	HMM	148	144	94.44	36.76	136	KTT96020.1	arsenic resistance N-acetyltransferase ArsN2	NF040501.1	arsenic resistance N-acetyltransferase ArsN2	3
GCA_035332585.1	Ferruginibacter sp.	HNA15099.1	blaOXA	class D beta-lactamase	core	AMR	AMR	BETA-LACTAM	BETA-LACTAM	HMM	273	267	95.13	41.51	265	WP_003235647.1	class D beta-lactamase	NF012161.0	class D beta-lactamase	3
GCA_035332585.1	Ferruginibacter sp.	HNA15893.1	arsN2	arsenic resistance N-acetyltransferase ArsN2	plus	STRESS	METAL	ARSENIC	ARSENIC	HMM	148	144	94.44	36.76	136	KTT96020.1	arsenic resistance N-acetyltransferase ArsN2	NF040501.1	arsenic resistance N-acetyltransferase ArsN2	1
GCA_035332585.1	Ferruginibacter sp.	HNA17893.1	bla	BlaB/IND/MUS family subclass B1 metallo-beta-lactamase	core	AMR	AMR	BETA-LACTAM	BETA-LACTAM	HMM	245	248	94.76	54.04	235	WP_012025466.1	BlaB/IND/MUS family subclass B1 metallo-beta-lactamase	NF012146.1	BlaB/IND/MUS family subclass B1 metallo-beta-lactamase	1
GCA_035332905.1	Chitinophagaceae bacterium	HNA19153.1	bla	BlaB/IND/MUS family subclass B1 metallo-beta-lactamase	core	AMR	AMR	BETA-LACTAM	BETA-LACTAM	HMM	245	241	97.93	54.17	240	WP_148044405.1	BlaB/IND/MUS family subclass B1 metallo-beta-lactamase	NF012146.1	BlaB/IND/MUS family subclass B1 metallo-beta-lactamase	2
GCA_035331965.1	Chitinophagaceae bacterium	HNA97654.1	bla	BlaB/IND/MUS family subclass B1 metallo-beta-lactamase	core	AMR	AMR	BETA-LACTAM	BETA-LACTAM	HMM	245	241	97.93	54.58	240	WP_148044405.1	BlaB/IND/MUS family subclass B1 metallo-beta-lactamase	NF012146.1	BlaB/IND/MUS family subclass B1 metallo-beta-lactamase	2
GCA_035335165.1	Chitinophagaceae bacterium	HNC39481.1	bla	BlaB/IND/MUS family subclass B1 metallo-beta-lactamase	core	AMR	AMR	BETA-LACTAM	BETA-LACTAM	HMM	245	241	97.93	55	240	WP_148044405.1	BlaB/IND/MUS family subclass B1 metallo-beta-lactamase	NF012146.1	BlaB/IND/MUS family subclass B1 metallo-beta-lactamase	1
GCA_035334325.1	Chitinophagaceae bacterium	HND95599.1	bla	BlaB/IND/MUS family subclass B1 metallo-beta-lactamase	core	AMR	AMR	BETA-LACTAM	BETA-LACTAM	HMM	245	241	97.93	54.17	240	WP_148044405.1	BlaB/IND/MUS family subclass B1 metallo-beta-lactamase	NF012146.1	BlaB/IND/MUS family subclass B1 metallo-beta-lactamase	1
GCA_035339615.1	Chitinophagaceae bacterium	HNE94281.1	blaOXA	class D beta-lactamase	core	AMR	AMR	BETA-LACTAM	BETA-LACTAM	HMM	269	275	100	39.01	282	WP_274293089.1	class D beta-lactamase	NF012161.0	class D beta-lactamase	2
GCA_035339495.1	Ferruginibacter sp.	HNF00824.1	arsN2	arsenic resistance N-acetyltransferase ArsN2	plus	STRESS	METAL	ARSENIC	ARSENIC	HMM	148	144	94.44	36.76	136	KTT96020.1	arsenic resistance N-acetyltransferase ArsN2	NF040501.1	arsenic resistance N-acetyltransferase ArsN2	2
GCA_035339495.1	Ferruginibacter sp.	HNF00949.1	blaOXA	class D beta-lactamase	core	AMR	AMR	BETA-LACTAM	BETA-LACTAM	HMM	273	267	95.13	41.51	265	WP_003235647.1	class D beta-lactamase	NF012161.0	class D beta-lactamase	1
GCA_035339495.1	Ferruginibacter sp.	HNF02665.1	bla	BlaB/IND/MUS family subclass B1 metallo-beta-lactamase	core	AMR	AMR	BETA-LACTAM	BETA-LACTAM	HMM	245	248	94.76	54.47	235	WP_012025466.1	BlaB/IND/MUS family subclass B1 metallo-beta-lactamase	NF012146.1	BlaB/IND/MUS family subclass B1 metallo-beta-lactamase	6
GCA_035339255.1	Ferruginibacter sp.	HNF42510.1	arsN2	arsenic resistance N-acetyltransferase ArsN2	plus	STRESS	METAL	ARSENIC	ARSENIC	HMM	148	144	94.44	36.76	136	KTT96020.1	arsenic resistance N-acetyltransferase ArsN2	NF040501.1	arsenic resistance N-acetyltransferase ArsN2	6
GCA_035339575.1	Chitinophagaceae bacterium	HNF47588.1	bla	subclass B1 metallo-beta-lactamase	core	AMR	AMR	BETA-LACTAM	BETA-LACTAM	HMM	211	241	84.23	57	207	WP_148044405.1	subclass B1 metallo-beta-lactamase	NF033088.2	subclass B1 metallo-beta-lactamase	6
GCA_035338875.1	Chitinophagaceae bacterium	HNF71007.1	arr	NAD(+)--rifampin ADP-ribosyltransferase	core	AMR	AMR	RIFAMYCIN	RIFAMYCIN	HMM	147	137	98.54	58.52	135	WP_012695486.1	NAD(+)--rifampin ADP-ribosyltransferase	NF033144.1	NAD(+)--rifampin ADP-ribosyltransferase	6
GCA_035338415.1	Ferruginibacter sp.	HNG62382.1	blaOXA	class D beta-lactamase	core	AMR	AMR	BETA-LACTAM	BETA-LACTAM	HMM	273	267	95.13	41.51	265	WP_003235647.1	class D beta-lactamase	NF012161.0	class D beta-lactamase	6
GCA_035338415.1	Ferruginibacter sp.	HNG64175.1	bla	BlaB/IND/MUS family subclass B1 metallo-beta-lactamase	core	AMR	AMR	BETA-LACTAM	BETA-LACTAM	HMM	245	248	94.76	54.47	235	WP_012025466.1	BlaB/IND/MUS family subclass B1 metallo-beta-lactamase	NF012146.1	BlaB/IND/MUS family subclass B1 metallo-beta-lactamase	6
GCA_035338055.1	Ferruginibacter sp.	HNH21128.1	arsN2	arsenic resistance N-acetyltransferase ArsN2	plus	STRESS	METAL	ARSENIC	ARSENIC	HMM	148	144	94.44	36.76	136	KTT96020.1	arsenic resistance N-acetyltransferase ArsN2	NF040501.1	arsenic resistance N-acetyltransferase ArsN2	6
GCA_035338055.1	Ferruginibacter sp.	HNH22312.1	blaOXA	class D beta-lactamase	core	AMR	AMR	BETA-LACTAM	BETA-LACTAM	HMM	273	267	95.13	41.51	265	WP_003235647.1	class D beta-lactamase	NF012161.0	class D beta-lactamase	6
GCA_035336845.1	Chitinophagaceae bacterium	HNJ27199.1	bla	subclass B1 metallo-beta-lactamase	core	AMR	AMR	BETA-LACTAM	BETA-LACTAM	HMM	211	241	84.23	57	207	WP_148044405.1	subclass B1 metallo-beta-lactamase	NF033088.2	subclass B1 metallo-beta-lactamase	6
GCA_035336785.1	Ferruginibacter sp.	HNJ27558.1	arsN2	arsenic resistance N-acetyltransferase ArsN2	plus	STRESS	METAL	ARSENIC	ARSENIC	HMM	148	144	94.44	36.76	136	KTT96020.1	arsenic resistance N-acetyltransferase ArsN2	NF040501.1	arsenic resistance N-acetyltransferase ArsN2	6
GCA_035336785.1	Ferruginibacter sp.	HNJ29392.1	bla	BlaB/IND/MUS family subclass B1 metallo-beta-lactamase	core	AMR	AMR	BETA-LACTAM	BETA-LACTAM	HMM	245	248	94.76	54.47	235	WP_012025466.1	BlaB/IND/MUS family subclass B1 metallo-beta-lactamase	NF012146.1	BlaB/IND/MUS family subclass B1 metallo-beta-lactamase	6
GCA_035336585.1	Chitinophagaceae bacterium	HNJ56455.1	bla	BlaB/IND/MUS family subclass B1 metallo-beta-lactamase	core	AMR	AMR	BETA-LACTAM	BETA-LACTAM	HMM	245	241	97.93	55	240	WP_148044405.1	BlaB/IND/MUS family subclass B1 metallo-beta-lactamase	NF012146.1	BlaB/IND/MUS family subclass B1 metallo-beta-lactamase	6
GCA_035336445.1	Ferruginibacter sp.	HNJ93171.1	blaOXA	class D beta-lactamase	core	AMR	AMR	BETA-LACTAM	BETA-LACTAM	HMM	273	267	95.13	41.51	265	WP_003235647.1	class D beta-lactamase	NF012161.0	class D beta-lactamase	2
GCA_035336445.1	Ferruginibacter sp.	HNJ94173.1	arsN2	arsenic resistance N-acetyltransferase ArsN2	plus	STRESS	METAL	ARSENIC	ARSENIC	HMM	148	144	94.44	36.76	136	KTT96020.1	arsenic resistance N-acetyltransferase ArsN2	NF040501.1	arsenic resistance N-acetyltransferase ArsN2	2
GCA_035336445.1	Ferruginibacter sp.	HNJ95667.1	bla	BlaB/IND/MUS family subclass B1 metallo-beta-lactamase	core	AMR	AMR	BETA-LACTAM	BETA-LACTAM	HMM	245	248	94.76	54.47	235	WP_012025466.1	BlaB/IND/MUS family subclass B1 metallo-beta-lactamase	NF012146.1	BlaB/IND/MUS family subclass B1 metallo-beta-lactamase	1
GCA_035340115.1	Ferruginibacter sp.	HNK27702.1	arsN2	arsenic resistance N-acetyltransferase ArsN2	plus	STRESS	METAL	ARSENIC	ARSENIC	HMM	148	144	94.44	36.76	136	KTT96020.1	arsenic resistance N-acetyltransferase ArsN2	NF040501.1	arsenic resistance N-acetyltransferase ArsN2	2
GCA_035340115.1	Ferruginibacter sp.	HNK28338.1	blaOXA	class D beta-lactamase	core	AMR	AMR	BETA-LACTAM	BETA-LACTAM	HMM	273	267	95.13	41.51	265	WP_003235647.1	class D beta-lactamase	NF012161.0	class D beta-lactamase	2
GCA_035340115.1	Ferruginibacter sp.	HNK29013.1	bla	BlaB/IND/MUS family subclass B1 metallo-beta-lactamase	core	AMR	AMR	BETA-LACTAM	BETA-LACTAM	HMM	245	248	94.76	54.47	235	WP_012025466.1	BlaB/IND/MUS family subclass B1 metallo-beta-lactamase	NF012146.1	BlaB/IND/MUS family subclass B1 metallo-beta-lactamase	1
GCA_035347975.1	Chitinophagaceae bacterium	HNK60238.1	bla	subclass B1 metallo-beta-lactamase	core	AMR	AMR	BETA-LACTAM	BETA-LACTAM	HMM	211	241	84.23	57	207	WP_148044405.1	subclass B1 metallo-beta-lactamase	NF033088.2	subclass B1 metallo-beta-lactamase	1
GCA_035347295.1	Chitinophagaceae bacterium	HNL60945.1	bla	BlaB/IND/MUS family subclass B1 metallo-beta-lactamase	core	AMR	AMR	BETA-LACTAM	BETA-LACTAM	HMM	229	241	92.53	55.51	227	WP_148044405.1	BlaB/IND/MUS family subclass B1 metallo-beta-lactamase	NF012146.1	BlaB/IND/MUS family subclass B1 metallo-beta-lactamase	1
GCA_035347275.1	Ferruginibacter sp.	HNL63526.1	arsN2	arsenic resistance N-acetyltransferase ArsN2	plus	STRESS	METAL	ARSENIC	ARSENIC	HMM	148	144	94.44	36.76	136	KTT96020.1	arsenic resistance N-acetyltransferase ArsN2	NF040501.1	arsenic resistance N-acetyltransferase ArsN2	1
GCA_035347275.1	Ferruginibacter sp.	HNL65584.1	bla	subclass B1 metallo-beta-lactamase	core	AMR	AMR	BETA-LACTAM	BETA-LACTAM	HMM	196	241	79.67	56.25	192	WP_148044405.1	subclass B1 metallo-beta-lactamase	NF033088.2	subclass B1 metallo-beta-lactamase	1
GCA_035347275.1	Ferruginibacter sp.	HNL66259.1	blaOXA	class D beta-lactamase	core	AMR	AMR	BETA-LACTAM	BETA-LACTAM	HMM	273	267	95.13	41.51	265	WP_003235647.1	class D beta-lactamase	NF012161.0	class D beta-lactamase	2
GCA_035347035.1	Chitinophagaceae bacterium	HNL82912.1	blaOXA	class D beta-lactamase	core	AMR	AMR	BETA-LACTAM	BETA-LACTAM	HMM	269	275	100	39.01	282	WP_274293089.1	class D beta-lactamase	NF012161.0	class D beta-lactamase	2
GCA_035346415.1	Chitinophagaceae bacterium	HNM35033.1	blaOXA	class D beta-lactamase	core	AMR	AMR	BETA-LACTAM	BETA-LACTAM	HMM	269	275	100	39.01	282	WP_274293089.1	class D beta-lactamase	NF012161.0	class D beta-lactamase	1
GCA_035345355.1	Chitinophagaceae bacterium	HNN31940.1	blaOXA	class D beta-lactamase	core	AMR	AMR	BETA-LACTAM	BETA-LACTAM	HMM	269	275	100	39.01	282	WP_274293089.1	class D beta-lactamase	NF012161.0	class D beta-lactamase	2
GCA_035345475.1	Ferruginibacter sp.	HNN69848.1	blaOXA	class D beta-lactamase	core	AMR	AMR	BETA-LACTAM	BETA-LACTAM	HMM	273	267	95.13	41.51	265	WP_003235647.1	class D beta-lactamase	NF012161.0	class D beta-lactamase	2
GCA_035345475.1	Ferruginibacter sp.	HNN69878.1	arsN2	arsenic resistance N-acetyltransferase ArsN2	plus	STRESS	METAL	ARSENIC	ARSENIC	HMM	148	144	94.44	36.76	136	KTT96020.1	arsenic resistance N-acetyltransferase ArsN2	NF040501.1	arsenic resistance N-acetyltransferase ArsN2	2
GCA_035345475.1	Ferruginibacter sp.	HNN70130.1	bla	BlaB/IND/MUS family subclass B1 metallo-beta-lactamase	core	AMR	AMR	BETA-LACTAM	BETA-LACTAM	HMM	245	248	94.76	54.47	235	WP_012025466.1	BlaB/IND/MUS family subclass B1 metallo-beta-lactamase	NF012146.1	BlaB/IND/MUS family subclass B1 metallo-beta-lactamase	2
GCA_035345435.1	Chitinophagaceae bacterium	HNO00047.1	bla	BlaB/IND/MUS family subclass B1 metallo-beta-lactamase	core	AMR	AMR	BETA-LACTAM	BETA-LACTAM	HMM	245	241	97.93	54.58	240	WP_148044405.1	BlaB/IND/MUS family subclass B1 metallo-beta-lactamase	NF012146.1	BlaB/IND/MUS family subclass B1 metallo-beta-lactamase	1
GCA_035345135.1	Chitinophagaceae bacterium	HNO55254.1	bla	subclass B1 metallo-beta-lactamase	core	AMR	AMR	BETA-LACTAM	BETA-LACTAM	HMM	211	241	84.23	57	207	WP_148044405.1	subclass B1 metallo-beta-lactamase	NF033088.2	subclass B1 metallo-beta-lactamase	1
GCA_035344775.1	Ferruginibacter sp.	HNO98301.1	arsN2	arsenic resistance N-acetyltransferase ArsN2	plus	STRESS	METAL	ARSENIC	ARSENIC	HMM	148	144	94.44	36.76	136	KTT96020.1	arsenic resistance N-acetyltransferase ArsN2	NF040501.1	arsenic resistance N-acetyltransferase ArsN2	1
GCA_035344775.1	Ferruginibacter sp.	HNO98923.1	bla	BlaB/IND/MUS family subclass B1 metallo-beta-lactamase	core	AMR	AMR	BETA-LACTAM	BETA-LACTAM	HMM	245	248	94.76	54.47	235	WP_012025466.1	BlaB/IND/MUS family subclass B1 metallo-beta-lactamase	NF012146.1	BlaB/IND/MUS family subclass B1 metallo-beta-lactamase	1
GCA_035344775.1	Ferruginibacter sp.	HNP00473.1	blaOXA	class D beta-lactamase	core	AMR	AMR	BETA-LACTAM	BETA-LACTAM	HMM	273	267	95.13	41.51	265	WP_003235647.1	class D beta-lactamase	NF012161.0	class D beta-lactamase	2
GCA_035344015.1	Panacibacter sp.	HNP23231.1	bla	subclass B3 metallo-beta-lactamase	core	AMR	AMR	BETA-LACTAM	BETA-LACTAM	HMM	295	293	96.25	66.2	287	WP_063842707.1	subclass B3 metallo-beta-lactamase	NF033105.1	subclass B3 metallo-beta-lactamase	2
GCA_035344015.1	Panacibacter sp.	HNP23646.1	arsN2	arsenic resistance N-acetyltransferase ArsN2	plus	STRESS	METAL	ARSENIC	ARSENIC	HMM	149	147	93.88	34.06	138	UIK15784.1	arsenic resistance N-acetyltransferase ArsN2	NF040501.1	arsenic resistance N-acetyltransferase ArsN2	4
GCA_035343855.1	Panacibacter sp.	HNP43558.1	bla	subclass B3 metallo-beta-lactamase	core	AMR	AMR	BETA-LACTAM	BETA-LACTAM	HMM	295	293	96.25	66.2	287	WP_063842707.1	subclass B3 metallo-beta-lactamase	NF033105.1	subclass B3 metallo-beta-lactamase	4
GCA_035343855.1	Panacibacter sp.	HNP46271.1	arsN2	arsenic resistance N-acetyltransferase ArsN2	plus	STRESS	METAL	ARSENIC	ARSENIC	HMM	149	147	93.88	34.06	138	UIK15784.1	arsenic resistance N-acetyltransferase ArsN2	NF040501.1	arsenic resistance N-acetyltransferase ArsN2	4
GCA_035343995.1	Ferruginibacter sp.	HNP54065.1	blaOXA	class D beta-lactamase	core	AMR	AMR	BETA-LACTAM	BETA-LACTAM	HMM	289	268	99.63	36.92	279	WP_003328240.1	class D beta-lactamase	NF012161.0	class D beta-lactamase	4
GCA_035343995.1	Ferruginibacter sp.	HNP54085.1	bla	subclass B1 metallo-beta-lactamase	core	AMR	AMR	BETA-LACTAM	BETA-LACTAM	HMM	255	252	99.6	58.17	251	WP_202272142.1	subclass B1 metallo-beta-lactamase	NF033088.2	subclass B1 metallo-beta-lactamase	1
GCA_035342515.1	Chitinophagaceae bacterium	HNR15260.1	bla	BlaB/IND/MUS family subclass B1 metallo-beta-lactamase	core	AMR	AMR	BETA-LACTAM	BETA-LACTAM	HMM	245	241	100	54.96	242	WP_148044405.1	BlaB/IND/MUS family subclass B1 metallo-beta-lactamase	NF012146.1	BlaB/IND/MUS family subclass B1 metallo-beta-lactamase	1
GCA_035355815.1	Ferruginibacter sp.	HNU87220.1	blaOXA	class D beta-lactamase	core	AMR	AMR	BETA-LACTAM	BETA-LACTAM	HMM	278	274	97.08	36.82	277	WP_114699274.1	class D beta-lactamase	NF012161.0	class D beta-lactamase	3
GCA_035355815.1	Ferruginibacter sp.	HNU87314.1	bla	class A beta-lactamase, subclass A2	core	AMR	AMR	BETA-LACTAM	BETA-LACTAM	HMM	299	304	98.36	58.19	299	WP_064964607.1	class A beta-lactamase, subclass A2	NF012099.1	class A beta-lactamase, subclass A2	3
GCA_035355815.1	Ferruginibacter sp.	HNU87819.1	arsN2	arsenic resistance N-acetyltransferase ArsN2	plus	STRESS	METAL	ARSENIC	ARSENIC	HMM	149	147	95.92	32.62	141	ABG05788.1	arsenic resistance N-acetyltransferase ArsN2	NF040501.1	arsenic resistance N-acetyltransferase ArsN2	3
GCA_035350055.1	Flavihumibacter sp.	HOA37261.1	bla	BlaB/IND/MUS family subclass B1 metallo-beta-lactamase	core	AMR	AMR	BETA-LACTAM	BETA-LACTAM	HMM	244	241	97.51	49.79	243	WP_148044405.1	BlaB/IND/MUS family subclass B1 metallo-beta-lactamase	NF012146.1	BlaB/IND/MUS family subclass B1 metallo-beta-lactamase	2
GCA_035371025.1	Ferruginibacter sp.	HOV44623.1	bla	BlaB/IND/MUS family subclass B1 metallo-beta-lactamase	core	AMR	AMR	BETA-LACTAM	BETA-LACTAM	HMM	247	241	97.93	51.9	237	WP_148044405.1	BlaB/IND/MUS family subclass B1 metallo-beta-lactamase	NF012146.1	BlaB/IND/MUS family subclass B1 metallo-beta-lactamase	2
GCA_035388045.1	Ferruginibacter sp.	HOZ76572.1	bla	subclass B3 metallo-beta-lactamase	core	AMR	AMR	BETA-LACTAM	BETA-LACTAM	HMM	283	293	95.9	66.19	281	WP_063842707.1	subclass B3 metallo-beta-lactamase	NF033105.1	subclass B3 metallo-beta-lactamase	1
GCA_035387685.1	Niabella sp.	HOZ85656.1	bla	subclass B3 metallo-beta-lactamase	core	AMR	AMR	BETA-LACTAM	BETA-LACTAM	HMM	277	290	91.72	61.65	266	WP_078779188.1	subclass B3 metallo-beta-lactamase	NF033105.1	subclass B3 metallo-beta-lactamase	2
GCA_035387645.1	Niabella sp.	HOZ97150.1	bla	subclass B3 metallo-beta-lactamase	core	AMR	AMR	BETA-LACTAM	BETA-LACTAM	HMM	272	290	91.72	61.65	266	WP_078779188.1	subclass B3 metallo-beta-lactamase	NF033105.1	subclass B3 metallo-beta-lactamase	2
GCA_035387665.1	Ferruginibacter sp.	HPA22713.1	bla	BlaB/IND/MUS family subclass B1 metallo-beta-lactamase	core	AMR	AMR	BETA-LACTAM	BETA-LACTAM	HMM	247	241	97.93	51.9	237	WP_148044405.1	BlaB/IND/MUS family subclass B1 metallo-beta-lactamase	NF012146.1	BlaB/IND/MUS family subclass B1 metallo-beta-lactamase	1
GCA_035399305.1	Chitinophagaceae bacterium	HPG12540.1	bla	BlaB/IND/MUS family subclass B1 metallo-beta-lactamase	core	AMR	AMR	BETA-LACTAM	BETA-LACTAM	HMM	247	248	99.6	52.63	247	WP_012025466.1	BlaB/IND/MUS family subclass B1 metallo-beta-lactamase	NF012146.1	BlaB/IND/MUS family subclass B1 metallo-beta-lactamase	1
GCA_035398145.1	Chitinophagaceae bacterium	HPH31454.1	bla	BlaB/IND/MUS family subclass B1 metallo-beta-lactamase	core	AMR	AMR	BETA-LACTAM	BETA-LACTAM	HMM	243	241	90.04	55.3	217	WP_148044405.1	BlaB/IND/MUS family subclass B1 metallo-beta-lactamase	NF012146.1	BlaB/IND/MUS family subclass B1 metallo-beta-lactamase	1
GCA_035398285.1	Sediminibacterium sp.	HPH36188.1	bla	BlaB/IND/MUS family subclass B1 metallo-beta-lactamase	core	AMR	AMR	BETA-LACTAM	BETA-LACTAM	HMM	343	246	97.97	51.24	242	WP_318245543.1	BlaB/IND/MUS family subclass B1 metallo-beta-lactamase	NF012146.1	BlaB/IND/MUS family subclass B1 metallo-beta-lactamase	2
GCA_035398025.1	Ferruginibacter sp.	HPH84651.1	blaOXA	class D beta-lactamase	core	AMR	AMR	BETA-LACTAM	BETA-LACTAM	HMM	275	262	97.71	38.24	272	WP_041816295.1	class D beta-lactamase	NF012161.0	class D beta-lactamase	2
GCA_035397825.1	Ferruginibacter sp.	HPH90022.1	bla	subclass B3 metallo-beta-lactamase	core	AMR	AMR	BETA-LACTAM	BETA-LACTAM	HMM	283	293	95.9	66.19	281	WP_063842707.1	subclass B3 metallo-beta-lactamase	NF033105.1	subclass B3 metallo-beta-lactamase	1
GCA_035397825.1	Ferruginibacter sp.	HPH90367.1	arsN2	arsenic resistance N-acetyltransferase ArsN2	plus	STRESS	METAL	ARSENIC	ARSENIC	HMM	150	144	94.44	38.97	136	KTT96020.1	arsenic resistance N-acetyltransferase ArsN2	NF040501.1	arsenic resistance N-acetyltransferase ArsN2	2
GCA_035397385.1	Chitinophagaceae bacterium	HPI54867.1	bla	BlaB/IND/MUS family subclass B1 metallo-beta-lactamase	core	AMR	AMR	BETA-LACTAM	BETA-LACTAM	HMM	245	241	97.1	50.42	236	WP_148044405.1	BlaB/IND/MUS family subclass B1 metallo-beta-lactamase	NF012146.1	BlaB/IND/MUS family subclass B1 metallo-beta-lactamase	2
GCA_035400125.1	Chitinophagaceae bacterium	HPN58252.1	bla	BlaB/IND/MUS family subclass B1 metallo-beta-lactamase	core	AMR	AMR	BETA-LACTAM	BETA-LACTAM	HMM	243	241	90.04	55.3	217	WP_148044405.1	BlaB/IND/MUS family subclass B1 metallo-beta-lactamase	NF012146.1	BlaB/IND/MUS family subclass B1 metallo-beta-lactamase	1
GCA_035413105.1	Flavihumibacter sp.	HPZ88752.1	bla	BlaB/IND/MUS family subclass B1 metallo-beta-lactamase	core	AMR	AMR	BETA-LACTAM	BETA-LACTAM	HMM	244	241	97.51	50.21	243	WP_148044405.1	BlaB/IND/MUS family subclass B1 metallo-beta-lactamase	NF012146.1	BlaB/IND/MUS family subclass B1 metallo-beta-lactamase	2
GCA_035409505.1	Flavihumibacter sp.	HQD08603.1	bla	BlaB/IND/MUS family subclass B1 metallo-beta-lactamase	core	AMR	AMR	BETA-LACTAM	BETA-LACTAM	HMM	245	241	97.51	50.21	243	WP_148044405.1	BlaB/IND/MUS family subclass B1 metallo-beta-lactamase	NF012146.1	BlaB/IND/MUS family subclass B1 metallo-beta-lactamase	2
GCA_035429965.1	Ferruginibacter sp.	HQQ99898.1	bla	BlaB/IND/MUS family subclass B1 metallo-beta-lactamase	core	AMR	AMR	BETA-LACTAM	BETA-LACTAM	HMM	245	248	94.76	54.04	235	WP_012025466.1	BlaB/IND/MUS family subclass B1 metallo-beta-lactamase	NF012146.1	BlaB/IND/MUS family subclass B1 metallo-beta-lactamase	2
GCA_035429965.1	Ferruginibacter sp.	HQR01063.1	blaOXA	class D beta-lactamase	core	AMR	AMR	BETA-LACTAM	BETA-LACTAM	HMM	273	267	95.13	41.51	265	WP_003235647.1	class D beta-lactamase	NF012161.0	class D beta-lactamase	2
GCA_035429965.1	Ferruginibacter sp.	HQR01088.1	arsN2	arsenic resistance N-acetyltransferase ArsN2	plus	STRESS	METAL	ARSENIC	ARSENIC	HMM	149	144	94.44	36.76	136	KTT96020.1	arsenic resistance N-acetyltransferase ArsN2	NF040501.1	arsenic resistance N-acetyltransferase ArsN2	2
GCA_035429465.1	Sediminibacterium sp.	HQR91904.1	bla	BlaB/IND/MUS family subclass B1 metallo-beta-lactamase	core	AMR	AMR	BETA-LACTAM	BETA-LACTAM	HMM	245	241	100	50.83	242	WP_148044405.1	BlaB/IND/MUS family subclass B1 metallo-beta-lactamase	NF012146.1	BlaB/IND/MUS family subclass B1 metallo-beta-lactamase	2
GCA_035429025.1	Sediminibacterium sp.	HQS25354.1	bla	BlaB/IND/MUS family subclass B1 metallo-beta-lactamase	core	AMR	AMR	BETA-LACTAM	BETA-LACTAM	HMM	344	246	96.34	50.42	238	WP_318245543.1	BlaB/IND/MUS family subclass B1 metallo-beta-lactamase	NF012146.1	BlaB/IND/MUS family subclass B1 metallo-beta-lactamase	2
GCA_035429265.1	Sediminibacterium sp.	HQS36424.1	bla	BlaB/IND/MUS family subclass B1 metallo-beta-lactamase	core	AMR	AMR	BETA-LACTAM	BETA-LACTAM	HMM	344	246	96.34	50.42	238	WP_318245543.1	BlaB/IND/MUS family subclass B1 metallo-beta-lactamase	NF012146.1	BlaB/IND/MUS family subclass B1 metallo-beta-lactamase	2
GCA_035428885.1	Sediminibacterium sp.	HQS53537.1	bla	BlaB/IND/MUS family subclass B1 metallo-beta-lactamase	core	AMR	AMR	BETA-LACTAM	BETA-LACTAM	HMM	245	241	100	50.83	242	WP_148044405.1	BlaB/IND/MUS family subclass B1 metallo-beta-lactamase	NF012146.1	BlaB/IND/MUS family subclass B1 metallo-beta-lactamase	1
GCA_035427205.1	Chitinophagaceae bacterium	HQU56457.1	arsN1	arsinothricin resistance N-acetyltransferase ArsN1 family B	plus	STRESS	METAL	ARSENIC	ARSENIC	HMM	196	186	97.31	44.75	181	AAN67541.1	arsinothricin resistance N-acetyltransferase ArsN1 family B	NF040504.1	arsinothricin resistance N-acetyltransferase ArsN1 family B	1
GCA_035426865.1	Chitinophagaceae bacterium	HQV06320.1	arsN1	arsinothricin resistance N-acetyltransferase ArsN1 family B	plus	STRESS	METAL	ARSENIC	ARSENIC	HMM	196	186	97.31	44.75	181	AAN67541.1	arsinothricin resistance N-acetyltransferase ArsN1 family B	NF040504.1	arsinothricin resistance N-acetyltransferase ArsN1 family B	1
GCA_035426745.1	Ferruginibacter sp.	HQV43751.1	bla	BlaB/IND/MUS family subclass B1 metallo-beta-lactamase	core	AMR	AMR	BETA-LACTAM	BETA-LACTAM	HMM	247	241	97.93	51.9	237	WP_148044405.1	BlaB/IND/MUS family subclass B1 metallo-beta-lactamase	NF012146.1	BlaB/IND/MUS family subclass B1 metallo-beta-lactamase	1
GCA_035426585.1	Chitinophagaceae bacterium	HQV61686.1	bla	subclass B1 metallo-beta-lactamase	core	AMR	AMR	BETA-LACTAM	BETA-LACTAM	HMM	252	252	100	69.05	252	WP_202272142.1	subclass B1 metallo-beta-lactamase	NF033088.2	subclass B1 metallo-beta-lactamase	2
GCA_035426585.1	Chitinophagaceae bacterium	HQV62157.1	arsN1	arsinothricin resistance N-acetyltransferase ArsN1 family B	plus	STRESS	METAL	ARSENIC	ARSENIC	HMM	195	186	92.47	44.77	172	AAN67541.1	arsinothricin resistance N-acetyltransferase ArsN1 family B	NF040504.1	arsinothricin resistance N-acetyltransferase ArsN1 family B	2
GCA_035426065.1	Chitinophagaceae bacterium	HQV84684.1	bla	subclass B1 metallo-beta-lactamase	core	AMR	AMR	BETA-LACTAM	BETA-LACTAM	HMM	252	252	100	69.44	252	WP_202272142.1	subclass B1 metallo-beta-lactamase	NF033088.2	subclass B1 metallo-beta-lactamase	2
GCA_035426065.1	Chitinophagaceae bacterium	HQV84763.1	arsN1	arsinothricin resistance N-acetyltransferase ArsN1 family B	plus	STRESS	METAL	ARSENIC	ARSENIC	HMM	195	186	92.47	44.77	172	AAN67541.1	arsinothricin resistance N-acetyltransferase ArsN1 family B	NF040504.1	arsinothricin resistance N-acetyltransferase ArsN1 family B	2
GCA_035426205.1	Niabella sp.	HQW15350.1	bla	subclass B3 metallo-beta-lactamase	core	AMR	AMR	BETA-LACTAM	BETA-LACTAM	HMM	272	290	91.72	61.65	266	WP_078779188.1	subclass B3 metallo-beta-lactamase	NF033105.1	subclass B3 metallo-beta-lactamase	2
GCA_035425905.1	Chitinophagaceae bacterium	HQW44960.1	bla	BlaB/IND/MUS family subclass B1 metallo-beta-lactamase	core	AMR	AMR	BETA-LACTAM	BETA-LACTAM	HMM	245	241	97.93	53.33	240	WP_148044405.1	BlaB/IND/MUS family subclass B1 metallo-beta-lactamase	NF012146.1	BlaB/IND/MUS family subclass B1 metallo-beta-lactamase	2
GCA_035425665.1	Ferruginibacter sp.	HQW61894.1	bla	BlaB/IND/MUS family subclass B1 metallo-beta-lactamase	core	AMR	AMR	BETA-LACTAM	BETA-LACTAM	HMM	247	241	97.93	51.9	237	WP_148044405.1	BlaB/IND/MUS family subclass B1 metallo-beta-lactamase	NF012146.1	BlaB/IND/MUS family subclass B1 metallo-beta-lactamase	2
GCA_035425605.1	Ferruginibacter sp.	HQW83311.1	blaOXA	class D beta-lactamase	core	AMR	AMR	BETA-LACTAM	BETA-LACTAM	HMM	272	273	99.27	38.35	279	WP_016657654.1	class D beta-lactamase	NF012161.0	class D beta-lactamase	2
GCA_035425605.1	Ferruginibacter sp.	HQW83460.1	bla	metallo-beta-lactamase	core	AMR	AMR	BETA-LACTAM	BETA-LACTAM	HMM	170	241	68.88	60.12	168	WP_148044405.1	metallo-beta-lactamase	NF012229.1	metallo-beta-lactamase	1
GCA_035425685.1	Ferruginibacter sp.	HQW92536.1	blaOXA	class D beta-lactamase	core	AMR	AMR	BETA-LACTAM	BETA-LACTAM	HMM	278	267	85.77	41.25	240	WP_003235647.1	class D beta-lactamase	NF012161.0	class D beta-lactamase	1
GCA_035425685.1	Ferruginibacter sp.	HQW92742.1	bla	BlaB/IND/MUS family subclass B1 metallo-beta-lactamase	core	AMR	AMR	BETA-LACTAM	BETA-LACTAM	HMM	245	241	97.93	54.62	238	WP_148044405.1	BlaB/IND/MUS family subclass B1 metallo-beta-lactamase	NF012146.1	BlaB/IND/MUS family subclass B1 metallo-beta-lactamase	2
GCA_035434405.1	Niabella sp.	HQX20400.1	bla	subclass B3 metallo-beta-lactamase	core	AMR	AMR	BETA-LACTAM	BETA-LACTAM	HMM	272	290	91.72	61.65	266	WP_078779188.1	subclass B3 metallo-beta-lactamase	NF033105.1	subclass B3 metallo-beta-lactamase	2
GCA_035434205.1	Niabella sp.	HQX41015.1	bla	subclass B3 metallo-beta-lactamase	core	AMR	AMR	BETA-LACTAM	BETA-LACTAM	HMM	272	290	91.72	61.65	266	WP_078779188.1	subclass B3 metallo-beta-lactamase	NF033105.1	subclass B3 metallo-beta-lactamase	3
GCA_035434105.1	Chitinophagaceae bacterium	HQX71869.1	arsN1	arsinothricin resistance N-acetyltransferase ArsN1 family B	plus	STRESS	METAL	ARSENIC	ARSENIC	HMM	195	186	92.47	44.77	172	AAN67541.1	arsinothricin resistance N-acetyltransferase ArsN1 family B	NF040504.1	arsinothricin resistance N-acetyltransferase ArsN1 family B	3
GCA_035434105.1	Chitinophagaceae bacterium	HQX73530.1	bla	subclass B1 metallo-beta-lactamase	core	AMR	AMR	BETA-LACTAM	BETA-LACTAM	HMM	252	252	100	69.05	252	WP_202272142.1	subclass B1 metallo-beta-lactamase	NF033088.2	subclass B1 metallo-beta-lactamase	3
GCA_035433925.1	Chitinophagaceae bacterium	HQX95628.1	bla	subclass B1 metallo-beta-lactamase	core	AMR	AMR	BETA-LACTAM	BETA-LACTAM	HMM	252	252	100	71.03	252	WP_202272142.1	subclass B1 metallo-beta-lactamase	NF033088.2	subclass B1 metallo-beta-lactamase	1
GCA_035433925.1	Chitinophagaceae bacterium	HQX97188.1	arsN1	arsinothricin resistance N-acetyltransferase ArsN1 family B	plus	STRESS	METAL	ARSENIC	ARSENIC	HMM	207	186	94.62	46.02	176	AAN67541.1	arsinothricin resistance N-acetyltransferase ArsN1 family B	NF040504.1	arsinothricin resistance N-acetyltransferase ArsN1 family B	2
GCA_035433665.1	Ferruginibacter sp.	HQY10685.1	arsN2	arsenic resistance N-acetyltransferase ArsN2	plus	STRESS	METAL	ARSENIC	ARSENIC	HMM	148	144	98.61	34.51	142	KTT96020.1	arsenic resistance N-acetyltransferase ArsN2	NF040501.1	arsenic resistance N-acetyltransferase ArsN2	2
GCA_035433625.1	Ferruginibacter sp.	HQY17054.1	bla	BlaB/IND/MUS family subclass B1 metallo-beta-lactamase	core	AMR	AMR	BETA-LACTAM	BETA-LACTAM	HMM	247	241	97.93	51.9	237	WP_148044405.1	BlaB/IND/MUS family subclass B1 metallo-beta-lactamase	NF012146.1	BlaB/IND/MUS family subclass B1 metallo-beta-lactamase	1
GCA_035433305.1	Ferruginibacter sp.	HQY41868.1	bla	BlaB/IND/MUS family subclass B1 metallo-beta-lactamase	core	AMR	AMR	BETA-LACTAM	BETA-LACTAM	HMM	247	241	97.93	51.9	237	WP_148044405.1	BlaB/IND/MUS family subclass B1 metallo-beta-lactamase	NF012146.1	BlaB/IND/MUS family subclass B1 metallo-beta-lactamase	1
GCA_035432625.1	Chitinophagaceae bacterium	HQZ49582.1	bla	subclass B1 metallo-beta-lactamase	core	AMR	AMR	BETA-LACTAM	BETA-LACTAM	HMM	252	252	100	71.03	252	WP_202272142.1	subclass B1 metallo-beta-lactamase	NF033088.2	subclass B1 metallo-beta-lactamase	1
GCA_035432625.1	Chitinophagaceae bacterium	HQZ51167.1	arsN1	arsinothricin resistance N-acetyltransferase ArsN1 family B	plus	STRESS	METAL	ARSENIC	ARSENIC	HMM	207	186	94.62	46.02	176	AAN67541.1	arsinothricin resistance N-acetyltransferase ArsN1 family B	NF040504.1	arsinothricin resistance N-acetyltransferase ArsN1 family B	2
GCA_035432585.1	Chitinophagaceae bacterium	HQZ73596.1	arsN1	arsinothricin resistance N-acetyltransferase ArsN1 family B	plus	STRESS	METAL	ARSENIC	ARSENIC	HMM	195	186	92.47	44.77	172	AAN67541.1	arsinothricin resistance N-acetyltransferase ArsN1 family B	NF040504.1	arsinothricin resistance N-acetyltransferase ArsN1 family B	2
GCA_035432585.1	Chitinophagaceae bacterium	HQZ74817.1	bla	subclass B1 metallo-beta-lactamase	core	AMR	AMR	BETA-LACTAM	BETA-LACTAM	HMM	252	253	98.02	68.55	248	WP_119059468.1	subclass B1 metallo-beta-lactamase	NF033088.2	subclass B1 metallo-beta-lactamase	1
GCA_035432495.1	Chitinophagaceae bacterium	HRA10706.1	bla	subclass B1 metallo-beta-lactamase	core	AMR	AMR	BETA-LACTAM	BETA-LACTAM	HMM	252	252	100	71.03	252	WP_202272142.1	subclass B1 metallo-beta-lactamase	NF033088.2	subclass B1 metallo-beta-lactamase	2
GCA_035432495.1	Chitinophagaceae bacterium	HRA12102.1	arsN1	arsinothricin resistance N-acetyltransferase ArsN1 family B	plus	STRESS	METAL	ARSENIC	ARSENIC	HMM	207	186	94.62	46.02	176	AAN67541.1	arsinothricin resistance N-acetyltransferase ArsN1 family B	NF040504.1	arsinothricin resistance N-acetyltransferase ArsN1 family B	2
GCA_035443065.1	Niabella sp.	HRB06795.1	bla	subclass B3 metallo-beta-lactamase	core	AMR	AMR	BETA-LACTAM	BETA-LACTAM	HMM	272	290	91.72	61.65	266	WP_078779188.1	subclass B3 metallo-beta-lactamase	NF033105.1	subclass B3 metallo-beta-lactamase	3
GCA_035442965.1	Ferruginibacter sp.	HRB23963.1	bla	BlaB/IND/MUS family subclass B1 metallo-beta-lactamase	core	AMR	AMR	BETA-LACTAM	BETA-LACTAM	HMM	247	241	97.93	51.9	237	WP_148044405.1	BlaB/IND/MUS family subclass B1 metallo-beta-lactamase	NF012146.1	BlaB/IND/MUS family subclass B1 metallo-beta-lactamase	3
GCA_035442845.1	Niabella sp.	HRB28167.1	bla	subclass B3 metallo-beta-lactamase	core	AMR	AMR	BETA-LACTAM	BETA-LACTAM	HMM	272	290	91.72	61.65	266	WP_078779188.1	subclass B3 metallo-beta-lactamase	NF033105.1	subclass B3 metallo-beta-lactamase	3
GCA_035442785.1	Ferruginibacter sp.	HRB31114.1	bla	BlaB/IND/MUS family subclass B1 metallo-beta-lactamase	core	AMR	AMR	BETA-LACTAM	BETA-LACTAM	HMM	247	248	100	50	248	WP_012025466.1	BlaB/IND/MUS family subclass B1 metallo-beta-lactamase	NF012146.1	BlaB/IND/MUS family subclass B1 metallo-beta-lactamase	2
GCA_035443025.1	Niabella sp.	HRB35359.1	bla	subclass B3 metallo-beta-lactamase	core	AMR	AMR	BETA-LACTAM	BETA-LACTAM	HMM	272	290	91.72	61.65	266	WP_078779188.1	subclass B3 metallo-beta-lactamase	NF033105.1	subclass B3 metallo-beta-lactamase	2
GCA_035442705.1	Niabella sp.	HRB43368.1	bla	subclass B3 metallo-beta-lactamase	core	AMR	AMR	BETA-LACTAM	BETA-LACTAM	HMM	272	290	91.72	61.65	266	WP_078779188.1	subclass B3 metallo-beta-lactamase	NF033105.1	subclass B3 metallo-beta-lactamase	3
GCA_035442565.1	Niabella sp.	HRB49028.1	bla	subclass B3 metallo-beta-lactamase	core	AMR	AMR	BETA-LACTAM	BETA-LACTAM	HMM	272	290	91.72	61.65	266	WP_078779188.1	subclass B3 metallo-beta-lactamase	NF033105.1	subclass B3 metallo-beta-lactamase	3
GCA_035442895.1	Niabella sp.	HRB59926.1	bla	subclass B3 metallo-beta-lactamase	core	AMR	AMR	BETA-LACTAM	BETA-LACTAM	HMM	272	290	91.72	61.65	266	WP_078779188.1	subclass B3 metallo-beta-lactamase	NF033105.1	subclass B3 metallo-beta-lactamase	3
GCA_035442725.1	Niabella sp.	HRB62397.1	bla	subclass B3 metallo-beta-lactamase	core	AMR	AMR	BETA-LACTAM	BETA-LACTAM	HMM	272	290	91.72	61.65	266	WP_078779188.1	subclass B3 metallo-beta-lactamase	NF033105.1	subclass B3 metallo-beta-lactamase	1
GCA_035442885.1	Niabella sp.	HRB64523.1	bla	subclass B3 metallo-beta-lactamase	core	AMR	AMR	BETA-LACTAM	BETA-LACTAM	HMM	272	290	91.72	61.65	266	WP_078779188.1	subclass B3 metallo-beta-lactamase	NF033105.1	subclass B3 metallo-beta-lactamase	1
GCA_035442525.1	Niabella sp.	HRB74920.1	bla	subclass B3 metallo-beta-lactamase	core	AMR	AMR	BETA-LACTAM	BETA-LACTAM	HMM	272	290	91.72	61.65	266	WP_078779188.1	subclass B3 metallo-beta-lactamase	NF033105.1	subclass B3 metallo-beta-lactamase	2
GCA_035442545.1	Niabella sp.	HRB88897.1	bla	subclass B3 metallo-beta-lactamase	core	AMR	AMR	BETA-LACTAM	BETA-LACTAM	HMM	272	290	91.72	61.65	266	WP_078779188.1	subclass B3 metallo-beta-lactamase	NF033105.1	subclass B3 metallo-beta-lactamase	2
GCA_035442285.1	Niabella sp.	HRB95605.1	bla	subclass B3 metallo-beta-lactamase	core	AMR	AMR	BETA-LACTAM	BETA-LACTAM	HMM	272	290	91.72	61.65	266	WP_078779188.1	subclass B3 metallo-beta-lactamase	NF033105.1	subclass B3 metallo-beta-lactamase	1
GCA_035442325.1	Niabella sp.	HRC02336.1	bla	subclass B3 metallo-beta-lactamase	core	AMR	AMR	BETA-LACTAM	BETA-LACTAM	HMM	272	290	91.72	61.65	266	WP_078779188.1	subclass B3 metallo-beta-lactamase	NF033105.1	subclass B3 metallo-beta-lactamase	1
GCA_035442425.1	Niabella sp.	HRC05631.1	bla	subclass B3 metallo-beta-lactamase	core	AMR	AMR	BETA-LACTAM	BETA-LACTAM	HMM	272	290	91.72	61.65	266	WP_078779188.1	subclass B3 metallo-beta-lactamase	NF033105.1	subclass B3 metallo-beta-lactamase	1
GCA_035442205.1	Niabella sp.	HRC10518.1	bla	subclass B3 metallo-beta-lactamase	core	AMR	AMR	BETA-LACTAM	BETA-LACTAM	HMM	272	290	91.72	61.65	266	WP_078779188.1	subclass B3 metallo-beta-lactamase	NF033105.1	subclass B3 metallo-beta-lactamase	2
GCA_035442445.1	Niabella sp.	HRC21097.1	bla	subclass B3 metallo-beta-lactamase	core	AMR	AMR	BETA-LACTAM	BETA-LACTAM	HMM	272	290	91.72	61.65	266	WP_078779188.1	subclass B3 metallo-beta-lactamase	NF033105.1	subclass B3 metallo-beta-lactamase	2
GCA_035442245.1	Niabella sp.	HRC31275.1	bla	subclass B3 metallo-beta-lactamase	core	AMR	AMR	BETA-LACTAM	BETA-LACTAM	HMM	272	290	91.72	61.65	266	WP_078779188.1	subclass B3 metallo-beta-lactamase	NF033105.1	subclass B3 metallo-beta-lactamase	2
GCA_035440965.1	Ferruginibacter sp.	HRD56984.1	bla	subclass B3 metallo-beta-lactamase	core	AMR	AMR	BETA-LACTAM	BETA-LACTAM	HMM	291	290	98.62	57.99	288	WP_063860467.1	subclass B3 metallo-beta-lactamase	NF033105.1	subclass B3 metallo-beta-lactamase	2
GCA_035440965.1	Ferruginibacter sp.	HRD57004.1	blaOXA	class D beta-lactamase	core	AMR	AMR	BETA-LACTAM	BETA-LACTAM	HMM	270	268	95.52	39.41	269	WP_003328240.1	class D beta-lactamase	NF012161.0	class D beta-lactamase	2
GCA_035440545.1	Chitinophagaceae bacterium	HRE37999.1	arsN1	arsinothricin resistance N-acetyltransferase ArsN1 family B	plus	STRESS	METAL	ARSENIC	ARSENIC	HMM	196	186	96.77	45.05	182	AAN67541.1	arsinothricin resistance N-acetyltransferase ArsN1 family B	NF040504.1	arsinothricin resistance N-acetyltransferase ArsN1 family B	2
GCA_035440485.1	Ferruginibacter sp.	HRE62180.1	blaOXA	class D beta-lactamase	core	AMR	AMR	BETA-LACTAM	BETA-LACTAM	HMM	270	268	95.52	39.41	269	WP_003328240.1	class D beta-lactamase	NF012161.0	class D beta-lactamase	1
GCA_035440485.1	Ferruginibacter sp.	HRE63661.1	bla	subclass B3 metallo-beta-lactamase	core	AMR	AMR	BETA-LACTAM	BETA-LACTAM	HMM	291	290	98.62	57.99	288	WP_063860467.1	subclass B3 metallo-beta-lactamase	NF033105.1	subclass B3 metallo-beta-lactamase	1
GCA_035440485.1	Ferruginibacter sp.	HRE64849.1	bla	subclass B1 metallo-beta-lactamase	core	AMR	AMR	BETA-LACTAM	BETA-LACTAM	HMM	252	253	97.63	58.7	247	WP_119059468.1	subclass B1 metallo-beta-lactamase	NF033088.2	subclass B1 metallo-beta-lactamase	2
GCA_035440145.1	Chitinophagaceae bacterium	HRF19652.1	arsN1	arsinothricin resistance N-acetyltransferase ArsN1 family B	plus	STRESS	METAL	ARSENIC	ARSENIC	HMM	196	186	96.77	45.05	182	AAN67541.1	arsinothricin resistance N-acetyltransferase ArsN1 family B	NF040504.1	arsinothricin resistance N-acetyltransferase ArsN1 family B	2
GCA_035439525.1	Chitinophagaceae bacterium	HRG25602.1	bla	metallo-beta-lactamase	core	AMR	AMR	BETA-LACTAM	BETA-LACTAM	HMM	192	237	78.48	55.32	188	WP_063864592.1	metallo-beta-lactamase	NF012229.1	metallo-beta-lactamase	1
GCA_035439185.1	Chitinophagaceae bacterium	HRG82058.1	bla	BlaB/IND/MUS family subclass B1 metallo-beta-lactamase	core	AMR	AMR	BETA-LACTAM	BETA-LACTAM	HMM	247	241	100	51.23	244	WP_148044405.1	BlaB/IND/MUS family subclass B1 metallo-beta-lactamase	NF012146.1	BlaB/IND/MUS family subclass B1 metallo-beta-lactamase	3
GCA_035439185.1	Chitinophagaceae bacterium	HRG82320.1	arsN1	arsinothricin resistance N-acetyltransferase ArsN1 family B	plus	STRESS	METAL	ARSENIC	ARSENIC	HMM	197	186	93.55	47.13	174	AAN67541.1	arsinothricin resistance N-acetyltransferase ArsN1 family B	NF040504.1	arsinothricin resistance N-acetyltransferase ArsN1 family B	3
GCA_035438905.1	Chitinophagaceae bacterium	HRG93620.1	bla	BlaB/IND/MUS family subclass B1 metallo-beta-lactamase	core	AMR	AMR	BETA-LACTAM	BETA-LACTAM	HMM	247	241	100	51.23	244	WP_148044405.1	BlaB/IND/MUS family subclass B1 metallo-beta-lactamase	NF012146.1	BlaB/IND/MUS family subclass B1 metallo-beta-lactamase	3
GCA_035438905.1	Chitinophagaceae bacterium	HRG93718.1	arsN1	arsinothricin resistance N-acetyltransferase ArsN1 family B	plus	STRESS	METAL	ARSENIC	ARSENIC	HMM	197	186	93.55	47.13	174	AAN67541.1	arsinothricin resistance N-acetyltransferase ArsN1 family B	NF040504.1	arsinothricin resistance N-acetyltransferase ArsN1 family B	2
GCA_035438405.1	Panacibacter sp.	HRH47134.1	arr	NAD(+)--rifampin ADP-ribosyltransferase	core	AMR	AMR	RIFAMYCIN	RIFAMYCIN	HMM	150	137	93.43	57.03	128	WP_012695486.1	NAD(+)--rifampin ADP-ribosyltransferase	NF033144.1	NAD(+)--rifampin ADP-ribosyltransferase	2
GCA_035438405.1	Panacibacter sp.	HRH48972.1	bla	subclass B3 metallo-beta-lactamase	core	AMR	AMR	BETA-LACTAM	BETA-LACTAM	HMM	294	293	96.25	68.09	282	WP_063842707.1	subclass B3 metallo-beta-lactamase	NF033105.1	subclass B3 metallo-beta-lactamase	3
GCA_035438385.1	Panacibacter sp.	HRI20778.1	bla	subclass B3 metallo-beta-lactamase	core	AMR	AMR	BETA-LACTAM	BETA-LACTAM	HMM	294	293	95.22	67.74	279	WP_063842707.1	subclass B3 metallo-beta-lactamase	NF033105.1	subclass B3 metallo-beta-lactamase	3
GCA_035438385.1	Panacibacter sp.	HRI21336.1	arr	NAD(+)--rifampin ADP-ribosyltransferase	core	AMR	AMR	RIFAMYCIN	RIFAMYCIN	HMM	247	150	80.67	52.89	121	WP_033959319.1	NAD(+)--rifampin ADP-ribosyltransferase	NF033144.1	NAD(+)--rifampin ADP-ribosyltransferase	3
GCA_035438265.1	Ferruginibacter sp.	HRI23563.1	arsN2	arsenic resistance N-acetyltransferase ArsN2	plus	STRESS	METAL	ARSENIC	ARSENIC	HMM	149	147	85.03	35.2	125	ABG05788.1	arsenic resistance N-acetyltransferase ArsN2	NF040501.1	arsenic resistance N-acetyltransferase ArsN2	1
GCA_035438265.1	Ferruginibacter sp.	HRI24117.1	blaOXA	class D beta-lactamase	core	AMR	AMR	BETA-LACTAM	BETA-LACTAM	HMM	272	268	95.9	38.43	268	WP_003328240.1	class D beta-lactamase	NF012161.0	class D beta-lactamase	1
GCA_035446165.1	Agriterribacter sp.	HRN57147.1	blaOXA	class D beta-lactamase	core	AMR	AMR	BETA-LACTAM	BETA-LACTAM	HMM	272	265	95.85	39.53	258	WP_011071128.1	class D beta-lactamase	NF012161.0	class D beta-lactamase	2
GCA_035445945.1	Ferruginibacter sp.	HRN80484.1	blaOXA	class D beta-lactamase	core	AMR	AMR	BETA-LACTAM	BETA-LACTAM	HMM	272	267	95.13	40.6	266	WP_003235647.1	class D beta-lactamase	NF012161.0	class D beta-lactamase	2
GCA_035446085.1	Ferruginibacter sp.	HRN91490.1	blaOXA	class D beta-lactamase	core	AMR	AMR	BETA-LACTAM	BETA-LACTAM	HMM	272	267	96.63	38.46	260	WP_032492122.1	class D beta-lactamase	NF012161.0	class D beta-lactamase	1
GCA_035445765.1	Ferruginibacter sp.	HRO05168.1	blaOXA	class D beta-lactamase	core	AMR	AMR	BETA-LACTAM	BETA-LACTAM	HMM	272	267	96.63	38.46	260	WP_032492122.1	class D beta-lactamase	NF012161.0	class D beta-lactamase	1
GCA_035445725.1	Ferruginibacter sp.	HRO17975.1	blaOXA	class D beta-lactamase	core	AMR	AMR	BETA-LACTAM	BETA-LACTAM	HMM	255	267	91.76	40.49	247	WP_032492122.1	class D beta-lactamase	NF012161.0	class D beta-lactamase	1
GCA_035445465.1	Agriterribacter sp.	HRO44619.1	blaOXA	class D beta-lactamase	core	AMR	AMR	BETA-LACTAM	BETA-LACTAM	HMM	272	273	96.7	38.15	270	WP_057106444.1	class D beta-lactamase	NF012161.0	class D beta-lactamase	1
GCA_035445325.1	Chitinophagaceae bacterium	HRO69379.1	arsN2	arsenic resistance N-acetyltransferase ArsN2	plus	STRESS	METAL	ARSENIC	ARSENIC	HMM	146	147	96.6	38.03	142	UIK15784.1	arsenic resistance N-acetyltransferase ArsN2	NF040501.1	arsenic resistance N-acetyltransferase ArsN2	1
GCA_035445325.1	Chitinophagaceae bacterium	HRO71264.1	arr	NAD(+)--rifampin ADP-ribosyltransferase	core	AMR	AMR	RIFAMYCIN	RIFAMYCIN	HMM	120	143	78.32	52.68	112	WP_063842202.1	NAD(+)--rifampin ADP-ribosyltransferase	NF033144.1	NAD(+)--rifampin ADP-ribosyltransferase	1
GCA_035445385.1	Niabella sp.	HRO83717.1	tet(Q)	tetracycline resistance ribosomal protection protein Tet(Q)	core	AMR	AMR	TETRACYCLINE	TETRACYCLINE	BLASTP	641	641	100	99.69	641	WP_063856407.1	tetracycline resistance ribosomal protection protein Tet(Q)	NF012154.0	tetracycline resistance ribosomal protection protein Tet(Q)	1
GCA_035445205.1	Ferruginibacter sp.	HRO95527.1	blaOXA	class D beta-lactamase	core	AMR	AMR	BETA-LACTAM	BETA-LACTAM	HMM	272	267	96.63	38.46	260	WP_032492122.1	class D beta-lactamase	NF012161.0	class D beta-lactamase	2
GCA_035444995.1	Agriterribacter sp.	HRP30948.1	blaOXA	class D beta-lactamase	core	AMR	AMR	BETA-LACTAM	BETA-LACTAM	HMM	272	276	98.55	37.32	276	WP_122634439.1	class D beta-lactamase	NF012161.0	class D beta-lactamase	2
GCA_035444995.1	Agriterribacter sp.	HRP33126.1	bla	BlaB/IND/MUS family subclass B1 metallo-beta-lactamase	core	AMR	AMR	BETA-LACTAM	BETA-LACTAM	HMM	245	241	100	52.07	242	WP_148044405.1	BlaB/IND/MUS family subclass B1 metallo-beta-lactamase	NF012146.1	BlaB/IND/MUS family subclass B1 metallo-beta-lactamase	1
GCA_035444385.1	Ferruginibacter sp.	HRP50260.1	blaOXA	class D beta-lactamase	core	AMR	AMR	BETA-LACTAM	BETA-LACTAM	HMM	272	267	96.63	38.46	260	WP_032492122.1	class D beta-lactamase	NF012161.0	class D beta-lactamase	2
GCA_035444585.1	Agriterribacter sp.	HRP54856.1	blaOXA	class D beta-lactamase	core	AMR	AMR	BETA-LACTAM	BETA-LACTAM	HMM	245	258	87.98	41.38	232	WP_004919358.1	class D beta-lactamase	NF012161.0	class D beta-lactamase	2
GCA_035444765.1	Agriterribacter sp.	HRQ16056.1	blaOXA	class D beta-lactamase	core	AMR	AMR	BETA-LACTAM	BETA-LACTAM	HMM	272	273	96.7	38.15	270	WP_057106444.1	class D beta-lactamase	NF012161.0	class D beta-lactamase	2
GCA_035444165.1	Ferruginibacter sp.	HRQ21434.1	blaOXA	class D beta-lactamase	core	AMR	AMR	BETA-LACTAM	BETA-LACTAM	HMM	272	267	95.13	40.6	266	WP_003235647.1	class D beta-lactamase	NF012161.0	class D beta-lactamase	2
GCA_035455985.1	Flavitalea sp.	HSB93762.1	arr	NAD(+)--rifampin ADP-ribosyltransferase	core	AMR	AMR	RIFAMYCIN	RIFAMYCIN	HMM	132	137	95.62	59.54	131	WP_012695486.1	NAD(+)--rifampin ADP-ribosyltransferase	NF033144.1	NAD(+)--rifampin ADP-ribosyltransferase	4
GCA_035465555.1	Hanamia sp.	HSN09003.1	bla	subclass B3 metallo-beta-lactamase	core	AMR	AMR	BETA-LACTAM	BETA-LACTAM	HMM	209	289	72.66	64.76	210	WP_041884311.1	subclass B3 metallo-beta-lactamase	NF033105.1	subclass B3 metallo-beta-lactamase	4
GCA_035466995.1	Ferruginibacter sp.	HSN61373.1	blaOXA	class D beta-lactamase	core	AMR	AMR	BETA-LACTAM	BETA-LACTAM	HMM	274	268	97.01	40.66	273	WP_003328240.1	class D beta-lactamase	NF012161.0	class D beta-lactamase	4
GCA_035470645.1	Ginsengibacter sp.	HSQ44588.1	blaOXA	class D beta-lactamase	core	AMR	AMR	BETA-LACTAM	BETA-LACTAM	HMM	270	258	98.06	39.69	262	WP_004919358.1	class D beta-lactamase	NF012161.0	class D beta-lactamase	4
GCA_035474355.1	Chitinophagaceae bacterium	HSU29131.1	arsN2	arsenic resistance N-acetyltransferase ArsN2	plus	STRESS	METAL	ARSENIC	ARSENIC	HMM	147	147	97.28	32.87	143	ABG05788.1	arsenic resistance N-acetyltransferase ArsN2	NF040501.1	arsenic resistance N-acetyltransferase ArsN2	3
GCA_035475995.1	Hanamia sp.	HSV09888.1	arr	NAD(+)--rifampin ADP-ribosyltransferase	core	AMR	AMR	RIFAMYCIN	RIFAMYCIN	HMM	229	150	83.33	52.8	125	WP_033959319.1	NAD(+)--rifampin ADP-ribosyltransferase	NF033144.1	NAD(+)--rifampin ADP-ribosyltransferase	3
GCA_035475995.1	Hanamia sp.	HSV11900.1	bla	BlaB/IND/MUS family subclass B1 metallo-beta-lactamase	core	AMR	AMR	BETA-LACTAM	BETA-LACTAM	HMM	231	246	91.87	51.1	227	WP_318245543.1	BlaB/IND/MUS family subclass B1 metallo-beta-lactamase	NF012146.1	BlaB/IND/MUS family subclass B1 metallo-beta-lactamase	3
GCA_035483495.1	Puia sp.	HSZ33392.1	blaOXA	class D beta-lactamase	core	AMR	AMR	BETA-LACTAM	BETA-LACTAM	HMM	268	277	94.95	38.2	267	WP_016651348.1	class D beta-lactamase	NF012161.0	class D beta-lactamase	1
GCA_035483495.1	Puia sp.	HSZ35030.1	arr	NAD(+)--rifampin ADP-ribosyltransferase	core	AMR	AMR	RIFAMYCIN	RIFAMYCIN	HMM	102	150	66	59.6	99	WP_000237816.1	NAD(+)--rifampin ADP-ribosyltransferase	NF033144.1	NAD(+)--rifampin ADP-ribosyltransferase	2
GCA_035483315.1	Puia sp.	HSZ87690.1	bla	class A beta-lactamase, subclass A2	core	AMR	AMR	BETA-LACTAM	BETA-LACTAM	HMM	301	304	98.68	61.67	300	WP_154469535.1	class A beta-lactamase, subclass A2	NF012099.1	class A beta-lactamase, subclass A2	2
GCA_035485835.1	Puia sp.	HTB25794.1	bla	BlaB/IND/MUS family subclass B1 metallo-beta-lactamase	core	AMR	AMR	BETA-LACTAM	BETA-LACTAM	HMM	243	248	96.37	57.74	239	WP_012025466.1	BlaB/IND/MUS family subclass B1 metallo-beta-lactamase	NF012146.1	BlaB/IND/MUS family subclass B1 metallo-beta-lactamase	2
GCA_035485735.1	Ferruginibacter sp.	HTB51900.1	arr	NAD(+)--rifampin ADP-ribosyltransferase	core	AMR	AMR	RIFAMYCIN	RIFAMYCIN	HMM	136	143	86.71	53.23	124	WP_063842202.1	NAD(+)--rifampin ADP-ribosyltransferase	NF033144.1	NAD(+)--rifampin ADP-ribosyltransferase	2
GCA_035485735.1	Ferruginibacter sp.	HTB52748.1	blaOXA	class D beta-lactamase	core	AMR	AMR	BETA-LACTAM	BETA-LACTAM	HMM	268	258	96.12	42.02	257	WP_004919358.1	class D beta-lactamase	NF012161.0	class D beta-lactamase	2
GCA_035486495.1	Ferruginibacter sp.	HTC00870.1	blaOXA	class D beta-lactamase	core	AMR	AMR	BETA-LACTAM	BETA-LACTAM	HMM	275	274	98.91	40.73	275	WP_004295324.1	class D beta-lactamase	NF012161.0	class D beta-lactamase	2
GCA_035489435.1	Flavitalea sp.	HTE27773.1	bla	subclass B1 metallo-beta-lactamase	core	AMR	AMR	BETA-LACTAM	BETA-LACTAM	HMM	268	266	98.5	56.87	262	WP_081048762.1	subclass B1 metallo-beta-lactamase	NF033088.2	subclass B1 metallo-beta-lactamase	2
GCA_035489835.1	Flavitalea sp.	HTF31659.1	bla	metallo-beta-lactamase	core	AMR	AMR	BETA-LACTAM	BETA-LACTAM	HMM	153	289	52.94	70.59	153	WP_041884311.1	metallo-beta-lactamase	NF012229.1	metallo-beta-lactamase	2
GCA_035490815.1	Niabella sp.	HTG55771.1	bla	subclass B3 metallo-beta-lactamase	core	AMR	AMR	BETA-LACTAM	BETA-LACTAM	HMM	286	290	95.86	61.79	280	WP_078779188.1	subclass B3 metallo-beta-lactamase	NF033105.1	subclass B3 metallo-beta-lactamase	1
GCA_035492545.1	Puia sp.	HTI07091.1	bla	BlaB/IND/MUS family subclass B1 metallo-beta-lactamase	core	AMR	AMR	BETA-LACTAM	BETA-LACTAM	HMM	244	237	98.31	51.07	233	WP_063864592.1	BlaB/IND/MUS family subclass B1 metallo-beta-lactamase	NF012146.1	BlaB/IND/MUS family subclass B1 metallo-beta-lactamase	2
GCA_035492545.1	Puia sp.	HTI11424.1	bla	subclass B3 metallo-beta-lactamase	core	AMR	AMR	BETA-LACTAM	BETA-LACTAM	HMM	298	289	97.23	58.36	281	WP_041884311.1	subclass B3 metallo-beta-lactamase	NF033105.1	subclass B3 metallo-beta-lactamase	2
GCA_035492595.1	Puia sp.	HTI91284.1	bla	subclass B3 metallo-beta-lactamase	core	AMR	AMR	BETA-LACTAM	BETA-LACTAM	HMM	295	289	96.89	58.93	280	WP_041884311.1	subclass B3 metallo-beta-lactamase	NF033105.1	subclass B3 metallo-beta-lactamase	2
GCA_035492835.1	Dinghuibacter sp.	HTJ13742.1	bla	subclass B3 metallo-beta-lactamase	core	AMR	AMR	BETA-LACTAM	BETA-LACTAM	HMM	287	289	96.89	54.64	280	WP_041884311.1	subclass B3 metallo-beta-lactamase	NF033105.1	subclass B3 metallo-beta-lactamase	2
GCA_035495345.1	Chitinophagaceae bacterium	HTL07084.1	arr	NAD(+)--rifampin ADP-ribosyltransferase	core	AMR	AMR	RIFAMYCIN	RIFAMYCIN	HMM	145	143	88.81	51.97	127	WP_063842202.1	NAD(+)--rifampin ADP-ribosyltransferase	NF033144.1	NAD(+)--rifampin ADP-ribosyltransferase	1
GCA_035495345.1	Chitinophagaceae bacterium	HTL07442.1	bla	BlaB/IND/MUS family subclass B1 metallo-beta-lactamase	core	AMR	AMR	BETA-LACTAM	BETA-LACTAM	HMM	245	248	94.76	56.17	235	WP_012025466.1	BlaB/IND/MUS family subclass B1 metallo-beta-lactamase	NF012146.1	BlaB/IND/MUS family subclass B1 metallo-beta-lactamase	1
GCA_035497355.1	Flavipsychrobacter sp.	HTM65295.1	arr	NAD(+)--rifampin ADP-ribosyltransferase	core	AMR	AMR	RIFAMYCIN	RIFAMYCIN	HMM	247	150	83.33	49.6	125	WP_052238312.1	NAD(+)--rifampin ADP-ribosyltransferase	NF033144.1	NAD(+)--rifampin ADP-ribosyltransferase	2
GCA_035497395.1	Flavisolibacter sp.	HTM91207.1	blaOXA	class D beta-lactamase	core	AMR	AMR	BETA-LACTAM	BETA-LACTAM	HMM	269	258	93.41	42.23	251	WP_004919358.1	class D beta-lactamase	NF012161.0	class D beta-lactamase	2
GCA_035497395.1	Flavisolibacter sp.	HTM93003.1	arsN1	arsinothricin resistance N-acetyltransferase ArsN1 family B	plus	STRESS	METAL	ARSENIC	ARSENIC	HMM	200	186	93.55	45.98	174	AAN67541.1	arsinothricin resistance N-acetyltransferase ArsN1 family B	NF040504.1	arsinothricin resistance N-acetyltransferase ArsN1 family B	2
GCA_035497395.1	Flavisolibacter sp.	HTM93852.1	arsN2	arsenic resistance N-acetyltransferase ArsN2	plus	STRESS	METAL	ARSENIC	ARSENIC	HMM	142	147	92.52	34.56	136	ABG05788.1	arsenic resistance N-acetyltransferase ArsN2	NF040501.1	arsenic resistance N-acetyltransferase ArsN2	2
GCA_035497235.1	Agriterribacter sp.	HTN07078.1	blaOXA	class D beta-lactamase	core	AMR	AMR	BETA-LACTAM	BETA-LACTAM	HMM	271	258	98.45	39.39	264	WP_004919358.1	class D beta-lactamase	NF012161.0	class D beta-lactamase	1
GCA_035497235.1	Agriterribacter sp.	HTN08405.1	bla	subclass B1 metallo-beta-lactamase	core	AMR	AMR	BETA-LACTAM	BETA-LACTAM	HMM	265	266	100	59.4	266	WP_081048762.1	subclass B1 metallo-beta-lactamase	NF033088.2	subclass B1 metallo-beta-lactamase	2
GCA_035497555.1	Arachidicoccus sp.	HTN35867.1	bla	subclass B1 metallo-beta-lactamase	core	AMR	AMR	BETA-LACTAM	BETA-LACTAM	HMM	258	237	98.31	42.19	237	WP_063864592.1	subclass B1 metallo-beta-lactamase	NF033088.2	subclass B1 metallo-beta-lactamase	2
GCA_035497555.1	Arachidicoccus sp.	HTN37035.1	arr	NAD(+)--rifampin ADP-ribosyltransferase	core	AMR	AMR	RIFAMYCIN	RIFAMYCIN	HMM	231	150	83.33	51.2	125	WP_052238312.1	NAD(+)--rifampin ADP-ribosyltransferase	NF033144.1	NAD(+)--rifampin ADP-ribosyltransferase	4
GCA_035497455.1	Flavipsychrobacter sp.	HTN45221.1	arr	NAD(+)--rifampin ADP-ribosyltransferase	core	AMR	AMR	RIFAMYCIN	RIFAMYCIN	HMM	248	150	81.33	54.1	122	WP_033959319.1	NAD(+)--rifampin ADP-ribosyltransferase	NF033144.1	NAD(+)--rifampin ADP-ribosyltransferase	4
GCA_035497455.1	Flavipsychrobacter sp.	HTN46069.1	bla	BlaB/IND/MUS family subclass B1 metallo-beta-lactamase	core	AMR	AMR	BETA-LACTAM	BETA-LACTAM	HMM	247	248	99.6	51.61	248	WP_012025466.1	BlaB/IND/MUS family subclass B1 metallo-beta-lactamase	NF012146.1	BlaB/IND/MUS family subclass B1 metallo-beta-lactamase	4
GCA_035497795.1	Edaphocola sp.	HTO14148.1	aph(3')	APH(3') family aminoglycoside O-phosphotransferase	core	AMR	AMR	AMINOGLYCOSIDE	AMINOGLYCOSIDE	HMM	262	264	98.48	32.82	262	WP_019407932.1	APH(3') family aminoglycoside O-phosphotransferase	NF033068.1	APH(3') family aminoglycoside O-phosphotransferase	4
GCA_035497795.1	Edaphocola sp.	HTO15348.1	cfr	Cfr family 23S rRNA (adenine(2503)-C(8))-methyltransferase	core	AMR	AMR	PHENICOL/LINCOSAMIDE/OXAZOLIDINONE/PLEUROMUTILIN/STREPTOGRAMIN	CHLORAMPHENICOL/CLINDAMYCIN/FLORFENICOL/LINEZOLID/STREPTOGRAMIN A/TIAMULIN	BLASTP	356	344	100	93.31	344	WP_011987126.1	Cfr family 23S rRNA (adenine(2503)-C(8))-methyltransferase	NF000424.4	Cfr family 23S rRNA (adenine(2503)-C(8))-methyltransferase	4
GCA_035497795.1	Edaphocola sp.	HTO15411.1	arr	NAD(+)--rifampin ADP-ribosyltransferase	core	AMR	AMR	RIFAMYCIN	RIFAMYCIN	HMM	138	150	88.67	54.14	133	WP_033959319.1	NAD(+)--rifampin ADP-ribosyltransferase	NF033144.1	NAD(+)--rifampin ADP-ribosyltransferase	4
GCA_035497795.1	Edaphocola sp.	HTO15413.1	mef(A)	macrolide efflux MFS transporter Mef(A)	core	AMR	AMR	MACROLIDE	AZITHROMYCIN/ERYTHROMYCIN	HMM	404	408	99.26	79.51	405	WP_012102963.1	macrolide efflux MFS transporter Mef(A)	NF000245.1	macrolide efflux MFS transporter Mef(A)	4
GCA_035497795.1	Edaphocola sp.	HTO15766.1	tet(44)	tetracycline resistance ribosomal protection protein Tet(44)	core	AMR	AMR	TETRACYCLINE	TETRACYCLINE	BLASTP	640	640	100	98.91	640	WP_063855884.1	tetracycline resistance ribosomal protection protein Tet(44)	NF033148.1	TetM/TetW/TetO/TetS family tetracycline resistance ribosomal protection protein	4
GCA_035497795.1	Edaphocola sp.	HTO16723.1	tet(M)	tetracycline resistance ribosomal protection protein Tet(M)	core	AMR	AMR	TETRACYCLINE	TETRACYCLINE	EXACTP	639	639	100	100	639	WP_000691737.1	tetracycline resistance ribosomal protection protein Tet(M)	NF012155.1	tetracycline resistance ribosomal protection protein Tet(M)	2
GCA_035499675.1	Puia sp.	HTQ26790.1	bla	class A beta-lactamase, subclass A2	core	AMR	AMR	BETA-LACTAM	BETA-LACTAM	HMM	270	304	86.84	55.47	265	WP_011222052.1	class A beta-lactamase, subclass A2	NF012099.1	class A beta-lactamase, subclass A2	2
GCA_035499675.1	Puia sp.	HTQ27400.1	arr	NAD(+)--rifampin ADP-ribosyltransferase	core	AMR	AMR	RIFAMYCIN	RIFAMYCIN	HMM	148	137	99.27	57.35	136	WP_012695486.1	NAD(+)--rifampin ADP-ribosyltransferase	NF033144.1	NAD(+)--rifampin ADP-ribosyltransferase	1
GCA_035499855.1	Puia sp.	HTQ64081.1	bla	BlaB/IND/MUS family subclass B1 metallo-beta-lactamase	core	AMR	AMR	BETA-LACTAM	BETA-LACTAM	HMM	245	241	98.76	55.83	240	WP_148044405.1	BlaB/IND/MUS family subclass B1 metallo-beta-lactamase	NF012146.1	BlaB/IND/MUS family subclass B1 metallo-beta-lactamase	1
GCA_035499855.1	Puia sp.	HTQ64710.1	blaOXA	class D beta-lactamase	core	AMR	AMR	BETA-LACTAM	BETA-LACTAM	HMM	270	273	97.44	39.56	273	WP_420354116.1	class D beta-lactamase	NF012161.0	class D beta-lactamase	1
GCA_035501395.1	Puia sp.	HTR29426.1	bla	class A beta-lactamase, subclass A2	core	AMR	AMR	BETA-LACTAM	BETA-LACTAM	HMM	301	303	93.07	48.06	283	WP_041881964.1	class A beta-lactamase, subclass A2	NF012099.1	class A beta-lactamase, subclass A2	1
GCA_035501395.1	Puia sp.	HTR31416.1	bla	subclass B3 metallo-beta-lactamase	core	AMR	AMR	BETA-LACTAM	BETA-LACTAM	HMM	306	289	95.85	57.54	285	WP_041884311.1	subclass B3 metallo-beta-lactamase	NF033105.1	subclass B3 metallo-beta-lactamase	1
GCA_035501475.1	Puia sp.	HTS43589.1	blaOXA	class D beta-lactamase	core	AMR	AMR	BETA-LACTAM	BETA-LACTAM	HMM	270	277	94.22	38.95	267	WP_016651348.1	class D beta-lactamase	NF012161.0	class D beta-lactamase	1
GCA_035520395.1	Chitinophagaceae bacterium	HUM65799.1	arr	NAD(+)--rifampin ADP-ribosyltransferase	core	AMR	AMR	RIFAMYCIN	RIFAMYCIN	HMM	139	143	87.41	52.8	125	WP_063842202.1	NAD(+)--rifampin ADP-ribosyltransferase	NF033144.1	NAD(+)--rifampin ADP-ribosyltransferase	1
GCA_035521235.1	Chitinophagaceae bacterium	HUM97330.1	bla	BlaB/IND/MUS family subclass B1 metallo-beta-lactamase	core	AMR	AMR	BETA-LACTAM	BETA-LACTAM	HMM	245	246	98.78	54.51	244	WP_318245543.1	BlaB/IND/MUS family subclass B1 metallo-beta-lactamase	NF012146.1	BlaB/IND/MUS family subclass B1 metallo-beta-lactamase	2
GCA_035525195.1	Niastella sp.	HUP10617.1	bla	subclass B3 metallo-beta-lactamase	core	AMR	AMR	BETA-LACTAM	BETA-LACTAM	HMM	252	289	85.81	60.8	250	WP_041884311.1	subclass B3 metallo-beta-lactamase	NF033105.1	subclass B3 metallo-beta-lactamase	2
GCA_035525195.1	Niastella sp.	HUP11941.1	bla	subclass B3 metallo-beta-lactamase	core	AMR	AMR	BETA-LACTAM	BETA-LACTAM	HMM	212	294	71.43	58.1	210	WP_063842712.1	subclass B3 metallo-beta-lactamase	NF033105.1	subclass B3 metallo-beta-lactamase	1
GCA_035525195.1	Niastella sp.	HUP12221.1	arr	NAD(+)--rifampin ADP-ribosyltransferase	core	AMR	AMR	RIFAMYCIN	RIFAMYCIN	HMM	155	150	80.67	54.55	121	WP_033959319.1	NAD(+)--rifampin ADP-ribosyltransferase	NF033144.1	NAD(+)--rifampin ADP-ribosyltransferase	1
GCA_035526135.1	Flavitalea sp.	HUR12164.1	arr	NAD(+)--rifampin ADP-ribosyltransferase	core	AMR	AMR	RIFAMYCIN	RIFAMYCIN	HMM	148	137	94.16	62.79	129	WP_012695486.1	NAD(+)--rifampin ADP-ribosyltransferase	NF033144.1	NAD(+)--rifampin ADP-ribosyltransferase	2
GCA_035526625.1	Chitinophagaceae bacterium	HUR65260.1	arsN1	arsinothricin resistance N-acetyltransferase ArsN1 family B	plus	STRESS	METAL	ARSENIC	ARSENIC	HMM	190	186	92.47	46.51	172	AAN67541.1	arsinothricin resistance N-acetyltransferase ArsN1 family B	NF040504.1	arsinothricin resistance N-acetyltransferase ArsN1 family B	2
GCA_035532615.1	Hanamia sp.	HUZ58588.1	bla	class A beta-lactamase, subclass A2	core	AMR	AMR	BETA-LACTAM	BETA-LACTAM	HMM	300	304	100	55.41	305	WP_154469535.1	class A beta-lactamase, subclass A2	NF012099.1	class A beta-lactamase, subclass A2	3
GCA_035532615.1	Hanamia sp.	HUZ61162.1	arr	NAD(+)--rifampin ADP-ribosyltransferase	core	AMR	AMR	RIFAMYCIN	RIFAMYCIN	HMM	247	150	82.67	54.4	125	WP_033959319.1	NAD(+)--rifampin ADP-ribosyltransferase	NF033144.1	NAD(+)--rifampin ADP-ribosyltransferase	3
GCA_035532615.1	Hanamia sp.	HUZ61686.1	merA	mercury(II) reductase	plus	STRESS	METAL	MERCURY	MERCURY	HMM	557	568	96.65	67.76	549	ADP02162.1	mercury(II) reductase	TIGR02053.1	mercury(II) reductase	3
GCA_035532615.1	Hanamia sp.	HUZ61702.1	merF	mercury resistance system transport protein MerF	plus	STRESS	METAL	MERCURY	MERCURY	HMM	84	81	87.65	50.7	71	ABA25986.1	mercury resistance system transport protein MerF	NF033565.0	mercury resistance system transport protein MerF	2
GCA_035536415.1	Chitinophagaceae bacterium	HVE61734.1	arsN2	arsenic resistance N-acetyltransferase ArsN2	plus	STRESS	METAL	ARSENIC	ARSENIC	HMM	142	144	97.92	36.17	141	KTT96020.1	arsenic resistance N-acetyltransferase ArsN2	NF040501.1	arsenic resistance N-acetyltransferase ArsN2	2
GCA_035537315.1	Flavisolibacter sp.	HVF96992.1	bla	subclass B3 metallo-beta-lactamase	core	AMR	AMR	BETA-LACTAM	BETA-LACTAM	HMM	296	293	94.88	62.37	279	WP_063842707.1	subclass B3 metallo-beta-lactamase	NF033105.1	subclass B3 metallo-beta-lactamase	1
GCA_035537075.1	Chitinophagaceae bacterium	HVG14228.1	arr	NAD(+)--rifampin ADP-ribosyltransferase	core	AMR	AMR	RIFAMYCIN	RIFAMYCIN	HMM	148	143	90.91	57.69	130	WP_063842202.1	NAD(+)--rifampin ADP-ribosyltransferase	NF033144.1	NAD(+)--rifampin ADP-ribosyltransferase	3
GCA_035537075.1	Chitinophagaceae bacterium	HVG15795.1	arsN2	arsenic resistance N-acetyltransferase ArsN2	plus	STRESS	METAL	ARSENIC	ARSENIC	HMM	145	164	75.61	40.32	124	ABU58394.1	arsenic resistance N-acetyltransferase ArsN2	NF040501.1	arsenic resistance N-acetyltransferase ArsN2	3
GCA_035537355.1	Chitinophagaceae bacterium	HVG42658.1	arr	NAD(+)--rifampin ADP-ribosyltransferase	core	AMR	AMR	RIFAMYCIN	RIFAMYCIN	HMM	141	143	83.92	54.17	120	WP_063842202.1	NAD(+)--rifampin ADP-ribosyltransferase	NF033144.1	NAD(+)--rifampin ADP-ribosyltransferase	3
GCA_035538455.1	Chitinophaga sp.	HVI45070.1	bla	subclass B3 metallo-beta-lactamase	core	AMR	AMR	BETA-LACTAM	BETA-LACTAM	HMM	294	289	92.39	64.42	267	WP_041884311.1	subclass B3 metallo-beta-lactamase	NF033105.1	subclass B3 metallo-beta-lactamase	2
GCA_035538455.1	Chitinophaga sp.	HVI45842.1	bla	class A beta-lactamase	core	AMR	AMR	BETA-LACTAM	BETA-LACTAM	HMM	282	319	79.94	50.19	257	WP_063842272.1	class A beta-lactamase	NF033103.1	class A beta-lactamase	2
GCA_035538455.1	Chitinophaga sp.	HVI48502.1	blaOXA	class D beta-lactamase	core	AMR	AMR	BETA-LACTAM	BETA-LACTAM	HMM	267	258	94.96	38.34	253	WP_004919358.1	class D beta-lactamase	NF012161.0	class D beta-lactamase	1
GCA_035541355.1	Puia sp.	HVM89479.1	bla	subclass B3 metallo-beta-lactamase	core	AMR	AMR	BETA-LACTAM	BETA-LACTAM	HMM	295	293	95.56	63.93	280	WP_063842707.1	subclass B3 metallo-beta-lactamase	NF033105.1	subclass B3 metallo-beta-lactamase	1
GCA_035541355.1	Puia sp.	HVM89524.1	blaOXA	class D beta-lactamase	core	AMR	AMR	BETA-LACTAM	BETA-LACTAM	HMM	277	258	96.51	40.15	259	WP_004919358.1	class D beta-lactamase	NF012161.0	class D beta-lactamase	1
GCA_035541355.1	Puia sp.	HVM89842.1	arsN2	arsenic resistance N-acetyltransferase ArsN2	plus	STRESS	METAL	ARSENIC	ARSENIC	HMM	138	142	92.96	32.58	132	ABB05616.1	arsenic resistance N-acetyltransferase ArsN2	NF040501.1	arsenic resistance N-acetyltransferase ArsN2	2
GCA_035541355.1	Puia sp.	HVM89892.1	arr	NAD(+)--rifampin ADP-ribosyltransferase	core	AMR	AMR	RIFAMYCIN	RIFAMYCIN	HMM	231	150	82.67	50.81	124	WP_052238312.1	NAD(+)--rifampin ADP-ribosyltransferase	NF033144.1	NAD(+)--rifampin ADP-ribosyltransferase	2
GCA_035545215.1	Puia sp.	HVS97271.1	bla	subclass B1 metallo-beta-lactamase	core	AMR	AMR	BETA-LACTAM	BETA-LACTAM	HMM	249	237	91.56	52.07	217	WP_063864592.1	subclass B1 metallo-beta-lactamase	NF033088.2	subclass B1 metallo-beta-lactamase	1
GCA_035545755.1	Chitinophagaceae bacterium	HVT84168.1	bla	subclass B3 metallo-beta-lactamase	core	AMR	AMR	BETA-LACTAM	BETA-LACTAM	HMM	305	289	99.65	65.62	288	WP_041884311.1	subclass B3 metallo-beta-lactamase	NF033105.1	subclass B3 metallo-beta-lactamase	1
GCA_035545755.1	Chitinophagaceae bacterium	HVT85493.1	blaOXA	class D beta-lactamase	core	AMR	AMR	BETA-LACTAM	BETA-LACTAM	HMM	269	258	94.19	42.69	253	WP_004919358.1	class D beta-lactamase	NF012161.0	class D beta-lactamase	1
GCA_035545935.1	Puia sp.	HVU53633.1	bla	class A beta-lactamase, subclass A2	core	AMR	AMR	BETA-LACTAM	BETA-LACTAM	HMM	317	319	90.28	43.92	296	WP_063842272.1	class A beta-lactamase, subclass A2	NF012099.1	class A beta-lactamase, subclass A2	4
GCA_035545935.1	Puia sp.	HVU58519.1	bla	subclass B3 metallo-beta-lactamase	core	AMR	AMR	BETA-LACTAM	BETA-LACTAM	HMM	291	289	99.31	56.45	287	WP_041884311.1	subclass B3 metallo-beta-lactamase	NF033105.1	subclass B3 metallo-beta-lactamase	4
GCA_035546195.1	Puia sp.	HVU84852.1	bla	subclass B3 metallo-beta-lactamase	core	AMR	AMR	BETA-LACTAM	BETA-LACTAM	HMM	294	293	93.86	60.71	280	WP_063842707.1	subclass B3 metallo-beta-lactamase	NF033105.1	subclass B3 metallo-beta-lactamase	4
GCA_035546395.1	Puia sp.	HVU96401.1	bla	subclass B3 metallo-beta-lactamase	core	AMR	AMR	BETA-LACTAM	BETA-LACTAM	HMM	293	289	99.31	54.51	288	WP_041884311.1	subclass B3 metallo-beta-lactamase	NF033105.1	subclass B3 metallo-beta-lactamase	4
GCA_035546395.1	Puia sp.	HVU98711.1	ampC	class C beta-lactamase	core	AMR	AMR	BETA-LACTAM	BETA-LACTAM	HMM	385	396	90.4	51.4	358	WP_128268282.1	class C beta-lactamase	NF033085.1	class C beta-lactamase	1
GCA_035546735.1	Puia sp.	HVV06328.1	bla	subclass B3 metallo-beta-lactamase	core	AMR	AMR	BETA-LACTAM	BETA-LACTAM	HMM	291	289	99.31	57.49	287	WP_041884311.1	subclass B3 metallo-beta-lactamase	NF033105.1	subclass B3 metallo-beta-lactamase	3
GCA_035547295.1	Puia sp.	HVW60955.1	bla	subclass B1 metallo-beta-lactamase	core	AMR	AMR	BETA-LACTAM	BETA-LACTAM	HMM	251	241	90.04	50.92	218	WP_148044405.1	subclass B1 metallo-beta-lactamase	NF033088.2	subclass B1 metallo-beta-lactamase	3
GCA_035547295.1	Puia sp.	HVW61452.1	bla	class A beta-lactamase, subclass A2	core	AMR	AMR	BETA-LACTAM	BETA-LACTAM	HMM	293	303	92.74	45.55	281	WP_041881964.1	class A beta-lactamase, subclass A2	NF012099.1	class A beta-lactamase, subclass A2	3
GCA_035547495.1	Parafilimonas sp.	HVX26052.1	bla	subclass B3 metallo-beta-lactamase	core	AMR	AMR	BETA-LACTAM	BETA-LACTAM	HMM	294	290	97.93	59.44	286	WP_078675023.1	subclass B3 metallo-beta-lactamase	NF033105.1	subclass B3 metallo-beta-lactamase	4
GCA_035547455.1	Chitinophagaceae bacterium	HVX48971.1	bla	subclass B3 metallo-beta-lactamase	core	AMR	AMR	BETA-LACTAM	BETA-LACTAM	HMM	287	289	97.92	60.42	283	WP_041884311.1	subclass B3 metallo-beta-lactamase	NF033105.1	subclass B3 metallo-beta-lactamase	4
GCA_035547455.1	Chitinophagaceae bacterium	HVX51396.1	arsN2	arsenic resistance N-acetyltransferase ArsN2	plus	STRESS	METAL	ARSENIC	ARSENIC	HMM	147	164	78.66	38.76	129	ABU58394.1	arsenic resistance N-acetyltransferase ArsN2	NF040501.1	arsenic resistance N-acetyltransferase ArsN2	4
GCA_035548895.1	Puia sp.	HVY73679.1	arr	NAD(+)--rifampin ADP-ribosyltransferase	core	AMR	AMR	RIFAMYCIN	RIFAMYCIN	HMM	247	150	82.67	52.42	124	WP_052238312.1	NAD(+)--rifampin ADP-ribosyltransferase	NF033144.1	NAD(+)--rifampin ADP-ribosyltransferase	4
GCA_035548895.1	Puia sp.	HVY73931.1	bla	subclass B3 metallo-beta-lactamase	core	AMR	AMR	BETA-LACTAM	BETA-LACTAM	HMM	292	293	97.27	55.79	285	WP_063842707.1	subclass B3 metallo-beta-lactamase	NF033105.1	subclass B3 metallo-beta-lactamase	3
GCA_035549175.1	Chitinophagaceae bacterium	HVZ55436.1	bla	subclass B3 metallo-beta-lactamase	core	AMR	AMR	BETA-LACTAM	BETA-LACTAM	HMM	291	285	88.77	46.97	264	WP_063864745.1	subclass B3 metallo-beta-lactamase	NF033105.1	subclass B3 metallo-beta-lactamase	3
GCA_035549175.1	Chitinophagaceae bacterium	HVZ57684.1	arr	NAD(+)--rifampin ADP-ribosyltransferase	core	AMR	AMR	RIFAMYCIN	RIFAMYCIN	HMM	247	150	76	57.02	114	WP_033959319.1	NAD(+)--rifampin ADP-ribosyltransferase	NF033144.1	NAD(+)--rifampin ADP-ribosyltransferase	3
GCA_035549335.1	Chitinophagaceae bacterium	HVZ96401.1	blaOXA	class D beta-lactamase	core	AMR	AMR	BETA-LACTAM	BETA-LACTAM	HMM	269	265	97.36	37.97	266	WP_011071128.1	class D beta-lactamase	NF012161.0	class D beta-lactamase	1
GCA_035549335.1	Chitinophagaceae bacterium	HVZ98029.1	bla	subclass B3 metallo-beta-lactamase	core	AMR	AMR	BETA-LACTAM	BETA-LACTAM	HMM	294	293	97.27	62.81	285	WP_063842707.1	subclass B3 metallo-beta-lactamase	NF033105.1	subclass B3 metallo-beta-lactamase	1
GCA_035549335.1	Chitinophagaceae bacterium	HVZ98139.1	bla	subclass B3 metallo-beta-lactamase	core	AMR	AMR	BETA-LACTAM	BETA-LACTAM	HMM	305	289	99.65	65.62	288	WP_041884311.1	subclass B3 metallo-beta-lactamase	NF033105.1	subclass B3 metallo-beta-lactamase	3
GCA_035550215.1	Chitinophagaceae bacterium	HWB27970.1	bla	subclass B3 metallo-beta-lactamase	core	AMR	AMR	BETA-LACTAM	BETA-LACTAM	HMM	291	293	95.9	60.14	281	WP_063842707.1	subclass B3 metallo-beta-lactamase	NF033105.1	subclass B3 metallo-beta-lactamase	3
GCA_035550215.1	Chitinophagaceae bacterium	HWB28035.1	arsN2	arsenic resistance N-acetyltransferase ArsN2	plus	STRESS	METAL	ARSENIC	ARSENIC	HMM	145	147	92.52	37.5	136	ABG05788.1	arsenic resistance N-acetyltransferase ArsN2	NF040501.1	arsenic resistance N-acetyltransferase ArsN2	3
GCA_035550615.1	Puia sp.	HWB93652.1	bla	subclass B3 metallo-beta-lactamase	core	AMR	AMR	BETA-LACTAM	BETA-LACTAM	HMM	289	289	96.19	56.99	279	WP_041884311.1	subclass B3 metallo-beta-lactamase	NF033105.1	subclass B3 metallo-beta-lactamase	1
GCA_035550155.1	Chitinophagaceae bacterium	HWC53072.1	blaOXA	class D beta-lactamase	core	AMR	AMR	BETA-LACTAM	BETA-LACTAM	HMM	269	258	94.19	41.5	253	WP_004919358.1	class D beta-lactamase	NF012161.0	class D beta-lactamase	2
GCA_035554315.1	Ginsengibacter sp.	HWH63173.1	bla	subclass B3 metallo-beta-lactamase	core	AMR	AMR	BETA-LACTAM	BETA-LACTAM	HMM	294	289	96.54	65.95	279	WP_041884311.1	subclass B3 metallo-beta-lactamase	NF033105.1	subclass B3 metallo-beta-lactamase	2
GCA_035554655.1	Flavisolibacter sp.	HWI89684.1	blaOXA	class D beta-lactamase	core	AMR	AMR	BETA-LACTAM	BETA-LACTAM	HMM	269	258	97.29	41.13	265	WP_004919358.1	class D beta-lactamase	NF012161.0	class D beta-lactamase	3
GCA_035554655.1	Flavisolibacter sp.	HWI93758.1	arsN2	arsenic resistance N-acetyltransferase ArsN2	plus	STRESS	METAL	ARSENIC	ARSENIC	HMM	141	142	100	33.1	142	ABB05616.1	arsenic resistance N-acetyltransferase ArsN2	NF040501.1	arsenic resistance N-acetyltransferase ArsN2	3
GCA_035554655.1	Flavisolibacter sp.	HWI94367.1	arr	NAD(+)--rifampin ADP-ribosyltransferase	core	AMR	AMR	RIFAMYCIN	RIFAMYCIN	HMM	247	150	83.33	51.2	125	WP_052238312.1	NAD(+)--rifampin ADP-ribosyltransferase	NF033144.1	NAD(+)--rifampin ADP-ribosyltransferase	3
GCA_035555215.1	Flavisolibacter sp.	HWJ26592.1	bla	BlaB/IND/MUS family subclass B1 metallo-beta-lactamase	core	AMR	AMR	BETA-LACTAM	BETA-LACTAM	HMM	245	246	97.15	58.33	240	WP_318245543.1	BlaB/IND/MUS family subclass B1 metallo-beta-lactamase	NF012146.1	BlaB/IND/MUS family subclass B1 metallo-beta-lactamase	4
GCA_035555215.1	Flavisolibacter sp.	HWJ27205.1	arr	NAD(+)--rifampin ADP-ribosyltransferase	core	AMR	AMR	RIFAMYCIN	RIFAMYCIN	HMM	247	150	82.67	53.23	124	WP_000237816.1	NAD(+)--rifampin ADP-ribosyltransferase	NF033144.1	NAD(+)--rifampin ADP-ribosyltransferase	4
GCA_035555215.1	Flavisolibacter sp.	HWJ29191.1	arsN1	arsinothricin resistance N-acetyltransferase ArsN1 family B	plus	STRESS	METAL	ARSENIC	ARSENIC	HMM	200	186	95.16	43.5	177	AAN67541.1	arsinothricin resistance N-acetyltransferase ArsN1 family B	NF040504.1	arsinothricin resistance N-acetyltransferase ArsN1 family B	4
GCA_035555175.1	Flavisolibacter sp.	HWJ89751.1	arr	NAD(+)--rifampin ADP-ribosyltransferase	core	AMR	AMR	RIFAMYCIN	RIFAMYCIN	HMM	141	150	83.33	53.6	125	WP_052238312.1	NAD(+)--rifampin ADP-ribosyltransferase	NF033144.1	NAD(+)--rifampin ADP-ribosyltransferase	4
GCA_035564935.1	Chitinophaga sp.	HWV65038.1	bla	BlaB/IND/MUS family subclass B1 metallo-beta-lactamase	core	AMR	AMR	BETA-LACTAM	BETA-LACTAM	HMM	244	237	99.58	45.87	242	WP_063864592.1	BlaB/IND/MUS family subclass B1 metallo-beta-lactamase	NF012146.1	BlaB/IND/MUS family subclass B1 metallo-beta-lactamase	1
GCA_035564935.1	Chitinophaga sp.	HWV66888.1	blaOXA	class D beta-lactamase	core	AMR	AMR	BETA-LACTAM	BETA-LACTAM	HMM	267	248	98.39	38.76	258	WP_109545084.1	class D beta-lactamase	NF012161.0	class D beta-lactamase	1
GCA_035564935.1	Chitinophaga sp.	HWV68217.1	bla	class A beta-lactamase	core	AMR	AMR	BETA-LACTAM	BETA-LACTAM	HMM	299	319	84.95	50	272	WP_063842272.1	class A beta-lactamase	NF033103.1	class A beta-lactamase	1
GCA_035569655.1	Puia sp.	HXB08672.1	bla	subclass B3 metallo-beta-lactamase	core	AMR	AMR	BETA-LACTAM	BETA-LACTAM	HMM	293	289	99.31	57.49	287	WP_041884311.1	subclass B3 metallo-beta-lactamase	NF033105.1	subclass B3 metallo-beta-lactamase	3
GCA_035569135.1	Puia sp.	HXB31340.1	blaOXA	class D beta-lactamase	core	AMR	AMR	BETA-LACTAM	BETA-LACTAM	HMM	268	277	94.95	37.45	267	WP_016651348.1	class D beta-lactamase	NF012161.0	class D beta-lactamase	3
GCA_035570015.1	Puia sp.	HXB32002.1	bla	subclass B3 metallo-beta-lactamase	core	AMR	AMR	BETA-LACTAM	BETA-LACTAM	HMM	296	289	94.46	61.54	273	WP_041884311.1	subclass B3 metallo-beta-lactamase	NF033105.1	subclass B3 metallo-beta-lactamase	3
GCA_035569795.1	Puia sp.	HXB44496.1	arr	NAD(+)--rifampin ADP-ribosyltransferase	core	AMR	AMR	RIFAMYCIN	RIFAMYCIN	HMM	158	137	94.89	59.23	130	WP_012695486.1	NAD(+)--rifampin ADP-ribosyltransferase	NF033144.1	NAD(+)--rifampin ADP-ribosyltransferase	2
GCA_035569795.1	Puia sp.	HXB45661.1	blaOXA	class D beta-lactamase	core	AMR	AMR	BETA-LACTAM	BETA-LACTAM	HMM	270	280	96.79	38.27	277	WP_016162389.1	class D beta-lactamase	NF012161.0	class D beta-lactamase	2
GCA_035570155.1	Puia sp.	HXB91557.1	ampC	class C beta-lactamase	core	AMR	AMR	BETA-LACTAM	BETA-LACTAM	HMM	361	396	90.4	52.23	358	WP_128268282.1	class C beta-lactamase	NF033085.1	class C beta-lactamase	3
GCA_035570615.1	Puia sp.	HXB95529.1	bla	subclass B3 metallo-beta-lactamase	core	AMR	AMR	BETA-LACTAM	BETA-LACTAM	HMM	243	293	80.89	56.96	237	WP_063842707.1	subclass B3 metallo-beta-lactamase	NF033105.1	subclass B3 metallo-beta-lactamase	3
GCA_035572015.1	Puia sp.	HXD78689.1	bla	subclass B3 metallo-beta-lactamase	core	AMR	AMR	BETA-LACTAM	BETA-LACTAM	HMM	296	289	95.5	56.52	276	WP_041884311.1	subclass B3 metallo-beta-lactamase	NF033105.1	subclass B3 metallo-beta-lactamase	3
GCA_035601215.1	Chitinophagaceae bacterium	HXL57466.1	arr	NAD(+)--rifampin ADP-ribosyltransferase	core	AMR	AMR	RIFAMYCIN	RIFAMYCIN	HMM	251	150	82.67	53.23	124	WP_063842214.1	NAD(+)--rifampin ADP-ribosyltransferase	NF033144.1	NAD(+)--rifampin ADP-ribosyltransferase	1
GCA_035601215.1	Chitinophagaceae bacterium	HXL57878.1	arsN2	arsenic resistance N-acetyltransferase ArsN2	plus	STRESS	METAL	ARSENIC	ARSENIC	HMM	147	142	100	33.8	142	ABB05616.1	arsenic resistance N-acetyltransferase ArsN2	NF040501.1	arsenic resistance N-acetyltransferase ArsN2	4
GCA_035603835.1	Puia sp.	HXO74725.1	bla	BlaB/IND/MUS family subclass B1 metallo-beta-lactamase	core	AMR	AMR	BETA-LACTAM	BETA-LACTAM	HMM	244	248	96.37	50.62	241	WP_012025466.1	BlaB/IND/MUS family subclass B1 metallo-beta-lactamase	NF012146.1	BlaB/IND/MUS family subclass B1 metallo-beta-lactamase	4
GCA_035603835.1	Puia sp.	HXO75368.1	bla	subclass B3 metallo-beta-lactamase	core	AMR	AMR	BETA-LACTAM	BETA-LACTAM	HMM	296	289	99.65	56.94	288	WP_041884311.1	subclass B3 metallo-beta-lactamase	NF033105.1	subclass B3 metallo-beta-lactamase	4
GCA_035606335.1	Flavipsychrobacter sp.	HXS37278.1	arsN1	arsinothricin resistance N-acetyltransferase ArsN1 family B	plus	STRESS	METAL	ARSENIC	ARSENIC	HMM	164	186	87.1	41.36	162	AAN67541.1	arsinothricin resistance N-acetyltransferase ArsN1 family B	NF040504.1	arsinothricin resistance N-acetyltransferase ArsN1 family B	4
GCA_035606335.1	Flavipsychrobacter sp.	HXS38228.1	bla	subclass B3 metallo-beta-lactamase	core	AMR	AMR	BETA-LACTAM	BETA-LACTAM	HMM	287	289	96.89	62.14	280	WP_041884311.1	subclass B3 metallo-beta-lactamase	NF033105.1	subclass B3 metallo-beta-lactamase	1
GCA_035606315.1	Hanamia sp.	HXS54880.1	arr	NAD(+)--rifampin ADP-ribosyltransferase	core	AMR	AMR	RIFAMYCIN	RIFAMYCIN	HMM	248	150	83.33	54.4	125	WP_033959319.1	NAD(+)--rifampin ADP-ribosyltransferase	NF033144.1	NAD(+)--rifampin ADP-ribosyltransferase	3
GCA_035606315.1	Hanamia sp.	HXS54894.1	arr	NAD(+)--rifampin ADP-ribosyltransferase	core	AMR	AMR	RIFAMYCIN	RIFAMYCIN	HMM	247	143	82.52	55.08	118	WP_063842202.1	NAD(+)--rifampin ADP-ribosyltransferase	NF033144.1	NAD(+)--rifampin ADP-ribosyltransferase	3
GCA_035606315.1	Hanamia sp.	HXS57027.1	bla	subclass B3 metallo-beta-lactamase	core	AMR	AMR	BETA-LACTAM	BETA-LACTAM	HMM	290	293	93.52	66.79	274	WP_063842707.1	subclass B3 metallo-beta-lactamase	NF033105.1	subclass B3 metallo-beta-lactamase	3
GCA_035606315.1	Hanamia sp.	HXS58573.1	bla	class A beta-lactamase, subclass A2	core	AMR	AMR	BETA-LACTAM	BETA-LACTAM	HMM	299	303	93.4	58.13	289	WP_041881964.1	class A beta-lactamase, subclass A2	NF012099.1	class A beta-lactamase, subclass A2	3
GCA_035626735.1	Chitinophagaceae bacterium	HYC30413.1	arsN2	arsenic resistance N-acetyltransferase ArsN2	plus	STRESS	METAL	ARSENIC	ARSENIC	HMM	149	164	79.88	37.4	131	ABU58394.1	arsenic resistance N-acetyltransferase ArsN2	NF040501.1	arsenic resistance N-acetyltransferase ArsN2	3
GCA_035626755.1	Flavipsychrobacter sp.	HYD21587.1	arr	NAD(+)--rifampin ADP-ribosyltransferase	core	AMR	AMR	RIFAMYCIN	RIFAMYCIN	HMM	138	143	88.81	59.06	127	WP_063842202.1	NAD(+)--rifampin ADP-ribosyltransferase	NF033144.1	NAD(+)--rifampin ADP-ribosyltransferase	3
GCA_035626755.1	Flavipsychrobacter sp.	HYD22957.1	bla	class A beta-lactamase	core	AMR	AMR	BETA-LACTAM	BETA-LACTAM	HMM	309	319	90.28	35.86	290	WP_063842272.1	class A beta-lactamase	NF033103.1	class A beta-lactamase	2
GCA_035627855.1	Chitinophagaceae bacterium	HYE54478.1	arr	NAD(+)--rifampin ADP-ribosyltransferase	core	AMR	AMR	RIFAMYCIN	RIFAMYCIN	HMM	176	143	87.41	53.6	125	WP_063842202.1	NAD(+)--rifampin ADP-ribosyltransferase	NF033144.1	NAD(+)--rifampin ADP-ribosyltransferase	2
GCA_035628135.1	Chitinophagaceae bacterium	HYF29612.1	arsN2	arsenic resistance N-acetyltransferase ArsN2	plus	STRESS	METAL	ARSENIC	ARSENIC	HMM	151	147	95.24	37.14	140	ABG05788.1	arsenic resistance N-acetyltransferase ArsN2	NF040501.1	arsenic resistance N-acetyltransferase ArsN2	3
GCA_035629455.1	Flavisolibacter sp.	HYH15940.1	arr	NAD(+)--rifampin ADP-ribosyltransferase	core	AMR	AMR	RIFAMYCIN	RIFAMYCIN	HMM	148	150	90.67	59.56	136	WP_033959319.1	NAD(+)--rifampin ADP-ribosyltransferase	NF033144.1	NAD(+)--rifampin ADP-ribosyltransferase	3
GCA_035630635.1	Chitinophagaceae bacterium	HYJ39054.1	arsN2	arsenic resistance N-acetyltransferase ArsN2	plus	STRESS	METAL	ARSENIC	ARSENIC	HMM	166	164	85.37	37.86	140	ABU58394.1	arsenic resistance N-acetyltransferase ArsN2	NF040501.1	arsenic resistance N-acetyltransferase ArsN2	3
GCA_035631075.1	Parafilimonas sp.	HYJ64458.1	arr	NAD(+)--rifampin ADP-ribosyltransferase	core	AMR	AMR	RIFAMYCIN	RIFAMYCIN	HMM	247	150	82.67	51.61	124	WP_052238312.1	NAD(+)--rifampin ADP-ribosyltransferase	NF033144.1	NAD(+)--rifampin ADP-ribosyltransferase	3
GCA_035631175.1	Parafilimonas sp.	HYK44743.1	bla	subclass B3 metallo-beta-lactamase	core	AMR	AMR	BETA-LACTAM	BETA-LACTAM	HMM	295	293	99.66	62.37	295	WP_063842707.1	subclass B3 metallo-beta-lactamase	NF033105.1	subclass B3 metallo-beta-lactamase	3
GCA_035632535.1	Chitinophagaceae bacterium	HYM95129.1	blaOXA	class D beta-lactamase	core	AMR	AMR	BETA-LACTAM	BETA-LACTAM	HMM	270	258	93.8	42.86	252	WP_004919358.1	class D beta-lactamase	NF012161.0	class D beta-lactamase	3
GCA_035633915.1	Flavisolibacter sp.	HYO21724.1	arsN2	arsenic resistance N-acetyltransferase ArsN2	plus	STRESS	METAL	ARSENIC	ARSENIC	HMM	143	144	97.22	39.29	140	KTT96020.1	arsenic resistance N-acetyltransferase ArsN2	NF040501.1	arsenic resistance N-acetyltransferase ArsN2	3
GCA_035644255.1	Puia sp.	HZE85940.1	bla	subclass B3 metallo-beta-lactamase	core	AMR	AMR	BETA-LACTAM	BETA-LACTAM	HMM	294	289	98.96	60.49	286	WP_041884311.1	subclass B3 metallo-beta-lactamase	NF033105.1	subclass B3 metallo-beta-lactamase	3
GCA_035644875.1	Chitinophagaceae bacterium	HZG24224.1	bla	subclass B3 metallo-beta-lactamase	core	AMR	AMR	BETA-LACTAM	BETA-LACTAM	HMM	292	300	97	66.32	291	WP_063842717.1	subclass B3 metallo-beta-lactamase	NF033105.1	subclass B3 metallo-beta-lactamase	3
GCA_035645315.1	Flavisolibacter sp.	HZH01900.1	bla	metallo-beta-lactamase	core	AMR	AMR	BETA-LACTAM	BETA-LACTAM	HMM	208	266	79.32	48.82	211	WP_081048762.1	metallo-beta-lactamase	NF012229.1	metallo-beta-lactamase	4
GCA_035645595.1	Flavisolibacter sp.	HZH65248.1	bla	subclass B3 metallo-beta-lactamase	core	AMR	AMR	BETA-LACTAM	BETA-LACTAM	HMM	292	300	95	58.39	286	WP_063842717.1	subclass B3 metallo-beta-lactamase	NF033105.1	subclass B3 metallo-beta-lactamase	4
GCA_035645655.1	Flavisolibacter sp.	HZH96775.1	bla	subclass B3 metallo-beta-lactamase	core	AMR	AMR	BETA-LACTAM	BETA-LACTAM	HMM	291	293	95.56	62.28	281	WP_063842707.1	subclass B3 metallo-beta-lactamase	NF033105.1	subclass B3 metallo-beta-lactamase	4
GCA_035645795.1	Flavisolibacter sp.	HZI01776.1	bla	subclass B1 metallo-beta-lactamase	core	AMR	AMR	BETA-LACTAM	BETA-LACTAM	HMM	262	266	100	51.13	266	WP_081048762.1	subclass B1 metallo-beta-lactamase	NF033088.2	subclass B1 metallo-beta-lactamase	4
GCA_035646335.1	Chitinophagaceae bacterium	HZI53969.1	blaOXA	class D beta-lactamase	core	AMR	AMR	BETA-LACTAM	BETA-LACTAM	HMM	271	258	96.9	42.75	262	WP_004919358.1	class D beta-lactamase	NF012161.0	class D beta-lactamase	1
GCA_035647015.1	Chitinophagaceae bacterium	HZJ60231.1	bla	BlaB/IND/MUS family subclass B1 metallo-beta-lactamase	core	AMR	AMR	BETA-LACTAM	BETA-LACTAM	HMM	243	246	97.97	57.02	242	WP_318245543.1	BlaB/IND/MUS family subclass B1 metallo-beta-lactamase	NF012146.1	BlaB/IND/MUS family subclass B1 metallo-beta-lactamase	1
GCA_035654815.1	Hanamia sp.	HZW65824.1	bla	subclass B1 metallo-beta-lactamase	core	AMR	AMR	BETA-LACTAM	BETA-LACTAM	HMM	267	266	99.25	49.43	265	WP_081048762.1	subclass B1 metallo-beta-lactamase	NF033088.2	subclass B1 metallo-beta-lactamase	1
GCA_035654515.1	Hanamia sp.	HZW71037.1	bla	subclass B1 metallo-beta-lactamase	core	AMR	AMR	BETA-LACTAM	BETA-LACTAM	HMM	269	266	99.25	49.44	267	WP_081048762.1	subclass B1 metallo-beta-lactamase	NF033088.2	subclass B1 metallo-beta-lactamase	1
GCA_008386695.1	Chitinophaga agrisoli	KAA2237149.1	blaTEM	TEM family class A beta-lactamase	core	AMR	AMR	BETA-LACTAM	BETA-LACTAM	PARTIALP	225	286	78.67	99.56	225	WP_000027050.1	broad-spectrum class A beta-lactamase TEM-116	NF033103.1	class A beta-lactamase	2
GCA_008386695.1	Chitinophaga agrisoli	KAA2239035.1	bla	class A beta-lactamase	core	AMR	AMR	BETA-LACTAM	BETA-LACTAM	HMM	292	319	85.58	51.65	273	WP_063842272.1	class A beta-lactamase	NF033103.1	class A beta-lactamase	2
GCA_008386695.1	Chitinophaga agrisoli	KAA2239759.1	bla	subclass B1 metallo-beta-lactamase	core	AMR	AMR	BETA-LACTAM	BETA-LACTAM	HMM	277	249	92.37	41.99	231	WP_041258349.1	subclass B1 metallo-beta-lactamase	NF033088.2	subclass B1 metallo-beta-lactamase	1
GCA_008386695.1	Chitinophaga agrisoli	KAA2243869.1	bla	subclass B3 metallo-beta-lactamase	core	AMR	AMR	BETA-LACTAM	BETA-LACTAM	HMM	291	293	95.22	65.59	279	WP_063842707.1	subclass B3 metallo-beta-lactamase	NF033105.1	subclass B3 metallo-beta-lactamase	1
GCA_008386695.1	Chitinophaga agrisoli	KAA2245840.1	blaOXA	class D beta-lactamase	core	AMR	AMR	BETA-LACTAM	BETA-LACTAM	HMM	267	289	83.04	43.21	243	WP_075071939.1	class D beta-lactamase	NF012161.0	class D beta-lactamase	1
GCA_008629695.1	Taibaiella lutea	KAA5534896.1	arr	NAD(+)--rifampin ADP-ribosyltransferase	core	AMR	AMR	RIFAMYCIN	RIFAMYCIN	HMM	247	143	84.62	56.2	121	WP_063842202.1	NAD(+)--rifampin ADP-ribosyltransferase	NF033144.1	NAD(+)--rifampin ADP-ribosyltransferase	1
GCA_008629695.1	Taibaiella lutea	KAA5536721.1	bla	BlaB/IND/MUS family subclass B1 metallo-beta-lactamase	core	AMR	AMR	BETA-LACTAM	BETA-LACTAM	HMM	243	248	96.37	58.58	239	WP_012025466.1	BlaB/IND/MUS family subclass B1 metallo-beta-lactamase	NF012146.1	BlaB/IND/MUS family subclass B1 metallo-beta-lactamase	2
GCA_008629695.1	Taibaiella lutea	KAA5537472.1	blaOXA	class D beta-lactamase	core	AMR	AMR	BETA-LACTAM	BETA-LACTAM	HMM	281	262	99.24	36.79	280	WP_019396295.1	class D beta-lactamase	NF012161.0	class D beta-lactamase	2
GCA_008710285.1	Ginsengibacter hankyongi	KAA9035843.1	bla	subclass B3 metallo-beta-lactamase	core	AMR	AMR	BETA-LACTAM	BETA-LACTAM	HMM	294	289	98.27	64.79	284	WP_041884311.1	subclass B3 metallo-beta-lactamase	NF033105.1	subclass B3 metallo-beta-lactamase	2
GCA_008710285.1	Ginsengibacter hankyongi	KAA9039422.1	blaOXA	class D beta-lactamase	core	AMR	AMR	BETA-LACTAM	BETA-LACTAM	HMM	270	258	97.67	40.61	261	WP_004919358.1	class D beta-lactamase	NF012161.0	class D beta-lactamase	2
GCA_000814325.1	Flavihumibacter sp. ZG627	KIC90928.1	arsN2	arsenic resistance N-acetyltransferase ArsN2	plus	STRESS	METAL	ARSENIC	ARSENIC	HMM	140	164	82.32	34.07	135	ABU58394.1	arsenic resistance N-acetyltransferase ArsN2	NF040501.1	arsenic resistance N-acetyltransferase ArsN2	3
GCA_000814325.1	Flavihumibacter sp. ZG627	KIC91063.1	arr	NAD(+)--rifampin ADP-ribosyltransferase	core	AMR	AMR	RIFAMYCIN	RIFAMYCIN	HMM	136	137	97.81	61.94	134	WP_012695486.1	NAD(+)--rifampin ADP-ribosyltransferase	NF033144.1	NAD(+)--rifampin ADP-ribosyltransferase	3
GCA_000814325.1	Flavihumibacter sp. ZG627	KIC92101.1	bla	subclass B1 metallo-beta-lactamase	core	AMR	AMR	BETA-LACTAM	BETA-LACTAM	HMM	253	251	98.8	52.82	248	WP_123865086.1	subclass B1 metallo-beta-lactamase	NF033088.2	subclass B1 metallo-beta-lactamase	3
GCA_000814475.1	Flavihumibacter solisilvae	KIC94399.1	arr	NAD(+)--rifampin ADP-ribosyltransferase	core	AMR	AMR	RIFAMYCIN	RIFAMYCIN	HMM	144	143	88.81	59.06	127	WP_063842202.1	NAD(+)--rifampin ADP-ribosyltransferase	NF033144.1	NAD(+)--rifampin ADP-ribosyltransferase	1
GCA_001601815.1	Flavihumibacter sp. CACIAM 22H1	KYP13729.1	arsN2	arsenic resistance N-acetyltransferase ArsN2	plus	STRESS	METAL	ARSENIC	ARSENIC	HMM	149	142	95.77	35.29	136	ABB05616.1	arsenic resistance N-acetyltransferase ArsN2	NF040501.1	arsenic resistance N-acetyltransferase ArsN2	2
GCA_001601815.1	Flavihumibacter sp. CACIAM 22H1	KYP15816.1	bla	subclass B1 metallo-beta-lactamase	core	AMR	AMR	BETA-LACTAM	BETA-LACTAM	HMM	396	247	96.76	48.12	239	WP_013992183.1	subclass B1 metallo-beta-lactamase	NF033088.2	subclass B1 metallo-beta-lactamase	2
GCA_013694745.1	Chitinophagaceae bacterium	MBA2249252.1	blaOXA	class D beta-lactamase	core	AMR	AMR	BETA-LACTAM	BETA-LACTAM	HMM	271	274	100	37.41	278	WP_004295324.1	class D beta-lactamase	NF012161.0	class D beta-lactamase	1
GCA_013695175.1	Flavisolibacter sp.	MBA2329631.1	arsN2	arsenic resistance N-acetyltransferase ArsN2	plus	STRESS	METAL	ARSENIC	ARSENIC	HMM	111	144	71.53	38.83	103	KTT96020.1	arsenic resistance N-acetyltransferase ArsN2	NF040501.1	arsenic resistance N-acetyltransferase ArsN2	3
GCA_013823265.1	Chitinophaga sp.	MBA4197050.1	blaOXA	class D beta-lactamase	core	AMR	AMR	BETA-LACTAM	BETA-LACTAM	HMM	273	258	97.67	40.15	264	WP_004919358.1	class D beta-lactamase	NF012161.0	class D beta-lactamase	3
GCA_014163555.1	Flavisolibacter longurius	MBB1284595.1	arr	NAD(+)--rifampin ADP-ribosyltransferase	core	AMR	AMR	RIFAMYCIN	RIFAMYCIN	HMM	145	137	96.35	56.82	132	WP_012695486.1	NAD(+)--rifampin ADP-ribosyltransferase	NF033144.1	NAD(+)--rifampin ADP-ribosyltransferase	3
GCA_014163555.1	Flavisolibacter longurius	MBB1284705.1	arsN2	arsenic resistance N-acetyltransferase ArsN2	plus	STRESS	METAL	ARSENIC	ARSENIC	HMM	151	164	86.59	42.96	142	ABU58394.1	arsenic resistance N-acetyltransferase ArsN2	NF040501.1	arsenic resistance N-acetyltransferase ArsN2	2
GCA_014163555.1	Flavisolibacter longurius	MBB1286945.1	bla	subclass B1 metallo-beta-lactamase	core	AMR	AMR	BETA-LACTAM	BETA-LACTAM	HMM	246	247	97.57	48.76	242	WP_013992183.1	subclass B1 metallo-beta-lactamase	NF033088.2	subclass B1 metallo-beta-lactamase	2
GCA_014332695.1	Flavihumibacter stibioxidans	MBC6492775.1	arsN2	arsenic resistance N-acetyltransferase ArsN2	plus	STRESS	METAL	ARSENIC	ARSENIC	HMM	148	142	99.3	36.17	141	ABB05616.1	arsenic resistance N-acetyltransferase ArsN2	NF040501.1	arsenic resistance N-acetyltransferase ArsN2	3
GCA_014332695.1	Flavihumibacter stibioxidans	MBC6492998.1	bla	subclass B1 metallo-beta-lactamase	core	AMR	AMR	BETA-LACTAM	BETA-LACTAM	HMM	402	247	97.17	52.5	240	WP_013992183.1	subclass B1 metallo-beta-lactamase	NF033088.2	subclass B1 metallo-beta-lactamase	3
GCA_014376505.1	Ferruginibacter sp.	MBC7421913.1	bla	BlaB/IND/MUS family subclass B1 metallo-beta-lactamase	core	AMR	AMR	BETA-LACTAM	BETA-LACTAM	HMM	245	241	99.59	59.75	241	WP_148044405.1	BlaB/IND/MUS family subclass B1 metallo-beta-lactamase	NF012146.1	BlaB/IND/MUS family subclass B1 metallo-beta-lactamase	3
GCA_014376505.1	Ferruginibacter sp.	MBC7422489.1	blaOXA	class D beta-lactamase	core	AMR	AMR	BETA-LACTAM	BETA-LACTAM	HMM	271	258	93.8	41.43	251	WP_004919358.1	class D beta-lactamase	NF012161.0	class D beta-lactamase	1
GCA_014377125.1	Ferruginibacter sp.	MBC7507164.1	blaOXA	class D beta-lactamase	core	AMR	AMR	BETA-LACTAM	BETA-LACTAM	HMM	281	258	95.35	40	255	WP_004919358.1	class D beta-lactamase	NF012161.0	class D beta-lactamase	1
GCA_014377125.1	Ferruginibacter sp.	MBC7508091.1	blaOXA	class D beta-lactamase	core	AMR	AMR	BETA-LACTAM	BETA-LACTAM	HMM	274	258	94.96	40.16	254	WP_004919358.1	class D beta-lactamase	NF012161.0	class D beta-lactamase	1
GCA_014377385.1	Ferruginibacter sp.	MBC7535979.1	arsD	arsenite efflux transporter metallochaperone ArsD	plus	STRESS	METAL	ARSENIC	ARSENITE	HMM	402	120	96.67	36.43	129	AAB09625.1	arsenite efflux transporter metallochaperone ArsD	NF033727.2	arsenite efflux transporter metallochaperone ArsD	1
GCA_014377385.1	Ferruginibacter sp.	MBC7536552.1	blaOXA	class D beta-lactamase	core	AMR	AMR	BETA-LACTAM	BETA-LACTAM	HMM	271	268	94.03	37.84	259	WP_003328240.1	class D beta-lactamase	NF012161.0	class D beta-lactamase	1
GCA_014377675.1	Taibaiella sp.	MBC7554182.1	arr	NAD(+)--rifampin ADP-ribosyltransferase	core	AMR	AMR	RIFAMYCIN	RIFAMYCIN	HMM	144	137	94.89	58.46	130	WP_012695486.1	NAD(+)--rifampin ADP-ribosyltransferase	NF033144.1	NAD(+)--rifampin ADP-ribosyltransferase	1
GCA_014377975.1	Ferruginibacter sp.	MBC7626116.1	bla	subclass B3 metallo-beta-lactamase	core	AMR	AMR	BETA-LACTAM	BETA-LACTAM	HMM	292	293	95.56	69.64	280	WP_063842707.1	subclass B3 metallo-beta-lactamase	NF033105.1	subclass B3 metallo-beta-lactamase	1
GCA_014377975.1	Ferruginibacter sp.	MBC7627945.1	blaOXA	class D beta-lactamase	core	AMR	AMR	BETA-LACTAM	BETA-LACTAM	HMM	274	269	94.42	41.15	260	WP_242934114.1	class D beta-lactamase	NF012161.0	class D beta-lactamase	1
GCA_014377975.1	Ferruginibacter sp.	MBC7629641.1	merA	mercury(II) reductase	plus	STRESS	METAL	MERCURY	MERCURY	HMM	547	568	98.24	67.74	558	ADP02162.1	mercury(II) reductase	TIGR02053.1	mercury(II) reductase	1
GCA_014378405.1	Ferruginibacter sp.	MBC7688996.1	blaOXA	class D beta-lactamase	core	AMR	AMR	BETA-LACTAM	BETA-LACTAM	HMM	274	275	99.27	35.66	286	WP_231869629.1	class D beta-lactamase	NF012161.0	class D beta-lactamase	1
GCA_014379345.1	Chitinophagaceae bacterium	MBC7827459.1	arsN2	arsenic resistance N-acetyltransferase ArsN2	plus	STRESS	METAL	ARSENIC	ARSENIC	HMM	148	164	80.49	34.85	132	ABU58394.1	arsenic resistance N-acetyltransferase ArsN2	NF040501.1	arsenic resistance N-acetyltransferase ArsN2	1
GCA_014379515.1	Chitinophagaceae bacterium	MBC7848681.1	arsN2	arsenic resistance N-acetyltransferase ArsN2	plus	STRESS	METAL	ARSENIC	ARSENIC	HMM	147	144	96.53	33.57	140	KTT96020.1	arsenic resistance N-acetyltransferase ArsN2	NF040501.1	arsenic resistance N-acetyltransferase ArsN2	1
GCA_014379515.1	Chitinophagaceae bacterium	MBC7849456.1	arr	NAD(+)--rifampin ADP-ribosyltransferase	core	AMR	AMR	RIFAMYCIN	RIFAMYCIN	HMM	143	150	87.33	58.02	131	WP_052238312.1	NAD(+)--rifampin ADP-ribosyltransferase	NF033144.1	NAD(+)--rifampin ADP-ribosyltransferase	1
GCA_014379535.1	Ferruginibacter sp.	MBC7866758.1	blaOXA	class D beta-lactamase	core	AMR	AMR	BETA-LACTAM	BETA-LACTAM	HMM	265	262	97.33	39.69	257	WP_420354119.1	class D beta-lactamase	NF012161.0	class D beta-lactamase	1
GCA_014379625.1	Ferruginibacter sp.	MBC7886490.1	blaOXA	class D beta-lactamase	core	AMR	AMR	BETA-LACTAM	BETA-LACTAM	HMM	274	274	100	36.2	279	WP_004295324.1	class D beta-lactamase	NF012161.0	class D beta-lactamase	1
GCA_014379905.1	Ferruginibacter sp.	MBC7935782.1	blaOXA	class D beta-lactamase	core	AMR	AMR	BETA-LACTAM	BETA-LACTAM	HMM	273	258	95.35	41.11	253	WP_004919358.1	class D beta-lactamase	NF012161.0	class D beta-lactamase	1
GCA_014379905.1	Ferruginibacter sp.	MBC7937902.1	bla	subclass B3 metallo-beta-lactamase	core	AMR	AMR	BETA-LACTAM	BETA-LACTAM	HMM	299	290	97.93	58.04	286	WP_031257659.1	subclass B3 metallo-beta-lactamase	NF033105.1	subclass B3 metallo-beta-lactamase	1
GCA_014379965.1	Chitinophagaceae bacterium	MBC7947775.1	arr	NAD(+)--rifampin ADP-ribosyltransferase	core	AMR	AMR	RIFAMYCIN	RIFAMYCIN	HMM	138	137	100	56.93	137	WP_012695486.1	NAD(+)--rifampin ADP-ribosyltransferase	NF033144.1	NAD(+)--rifampin ADP-ribosyltransferase	1
GCA_014529945.1	Chitinophaga varians	MBC9909780.1	catB	type B chloramphenicol O-acetyltransferase	core	AMR	AMR	PHENICOL	CHLORAMPHENICOL	HMM	209	212	97.17	74.27	206	WP_003112709.1	type B chloramphenicol O-acetyltransferase	NF000490.1	type B chloramphenicol O-acetyltransferase	2
GCA_014529945.1	Chitinophaga varians	MBC9909964.1	bla	subclass B1 metallo-beta-lactamase	core	AMR	AMR	BETA-LACTAM	BETA-LACTAM	HMM	251	248	96.37	43.27	245	WP_012025466.1	subclass B1 metallo-beta-lactamase	NF033088.2	subclass B1 metallo-beta-lactamase	2
GCA_014529945.1	Chitinophaga varians	MBC9910759.1	blaOXA	class D beta-lactamase	core	AMR	AMR	BETA-LACTAM	BETA-LACTAM	HMM	267	289	83.04	41.98	243	WP_075071939.1	class D beta-lactamase	NF012161.0	class D beta-lactamase	1
GCA_014529945.1	Chitinophaga varians	MBC9912379.1	bla	subclass B3 metallo-beta-lactamase	core	AMR	AMR	BETA-LACTAM	BETA-LACTAM	HMM	295	289	97.58	62.63	289	WP_041884311.1	subclass B3 metallo-beta-lactamase	NF033105.1	subclass B3 metallo-beta-lactamase	1
GCA_014529945.1	Chitinophaga varians	MBC9914598.1	aph(3')	APH(3') family aminoglycoside O-phosphotransferase	core	AMR	AMR	AMINOGLYCOSIDE	AMINOGLYCOSIDE	HMM	255	262	97.71	41.25	257	WP_063841674.1	APH(3') family aminoglycoside O-phosphotransferase	NF033068.1	APH(3') family aminoglycoside O-phosphotransferase	1
GCA_014529945.1	Chitinophaga varians	MBC9915070.1	bla	class A beta-lactamase	core	AMR	AMR	BETA-LACTAM	BETA-LACTAM	HMM	280	319	83.39	50.56	267	WP_063842272.1	class A beta-lactamase	NF033103.1	class A beta-lactamase	1
GCA_014529935.1	Chitinophaga qingshengii	MBC9929190.1	aph(3')	APH(3') family aminoglycoside O-phosphotransferase	core	AMR	AMR	AMINOGLYCOSIDE	AMINOGLYCOSIDE	HMM	255	262	97.71	40.08	257	WP_063841674.1	APH(3') family aminoglycoside O-phosphotransferase	NF033068.1	APH(3') family aminoglycoside O-phosphotransferase	1
GCA_014529935.1	Chitinophaga qingshengii	MBC9932663.1	bla	subclass B3 metallo-beta-lactamase	core	AMR	AMR	BETA-LACTAM	BETA-LACTAM	HMM	290	289	97.92	62.54	283	WP_041884311.1	subclass B3 metallo-beta-lactamase	NF033105.1	subclass B3 metallo-beta-lactamase	2
GCA_014529935.1	Chitinophaga qingshengii	MBC9933055.1	catB	type B chloramphenicol O-acetyltransferase	core	AMR	AMR	PHENICOL	CHLORAMPHENICOL	HMM	210	210	99.52	71.43	210	WP_000800689.1	type B chloramphenicol O-acetyltransferase	NF000490.1	type B chloramphenicol O-acetyltransferase	2
GCA_014529935.1	Chitinophaga qingshengii	MBC9933182.1	bla	subclass B1 metallo-beta-lactamase	core	AMR	AMR	BETA-LACTAM	BETA-LACTAM	HMM	254	246	97.15	45.68	243	WP_318245543.1	subclass B1 metallo-beta-lactamase	NF033088.2	subclass B1 metallo-beta-lactamase	1
GCA_014529935.1	Chitinophaga qingshengii	MBC9933635.1	blaOXA	class D beta-lactamase	core	AMR	AMR	BETA-LACTAM	BETA-LACTAM	HMM	267	289	83.04	41.56	243	WP_075071939.1	class D beta-lactamase	NF012161.0	class D beta-lactamase	1
GCA_014529935.1	Chitinophaga qingshengii	MBC9934100.1	bla	class A beta-lactamase	core	AMR	AMR	BETA-LACTAM	BETA-LACTAM	HMM	278	319	84.33	51.85	270	WP_063842272.1	class A beta-lactamase	NF033103.1	class A beta-lactamase	1
GCA_014533975.1	Flavisolibacter sp.	MBD0279388.1	arsN2	arsenic resistance N-acetyltransferase ArsN2	plus	STRESS	METAL	ARSENIC	ARSENIC	HMM	142	164	86.59	38.03	142	ABU58394.1	arsenic resistance N-acetyltransferase ArsN2	NF040501.1	arsenic resistance N-acetyltransferase ArsN2	2
GCA_014534025.1	Flavisolibacter sp.	MBD0288095.1	arr	NAD(+)--rifampin ADP-ribosyltransferase	core	AMR	AMR	RIFAMYCIN	RIFAMYCIN	HMM	247	150	90.67	48.53	136	WP_052238312.1	NAD(+)--rifampin ADP-ribosyltransferase	NF033144.1	NAD(+)--rifampin ADP-ribosyltransferase	2
GCA_014534025.1	Flavisolibacter sp.	MBD0288907.1	arsN2	arsenic resistance N-acetyltransferase ArsN2	plus	STRESS	METAL	ARSENIC	ARSENIC	HMM	142	164	86.59	35.92	142	ABU58394.1	arsenic resistance N-acetyltransferase ArsN2	NF040501.1	arsenic resistance N-acetyltransferase ArsN2	2
GCA_014533895.1	Flavisolibacter sp.	MBD0297317.1	arr	NAD(+)--rifampin ADP-ribosyltransferase	core	AMR	AMR	RIFAMYCIN	RIFAMYCIN	HMM	247	150	90.67	47.79	136	WP_052238312.1	NAD(+)--rifampin ADP-ribosyltransferase	NF033144.1	NAD(+)--rifampin ADP-ribosyltransferase	2
GCA_014533895.1	Flavisolibacter sp.	MBD0298032.1	arsN2	arsenic resistance N-acetyltransferase ArsN2	plus	STRESS	METAL	ARSENIC	ARSENIC	HMM	142	164	86.59	35.92	142	ABU58394.1	arsenic resistance N-acetyltransferase ArsN2	NF040501.1	arsenic resistance N-acetyltransferase ArsN2	2
GCA_014534275.1	Chitinophagaceae bacterium	MBD0333273.1	blaOXA	class D beta-lactamase	core	AMR	AMR	BETA-LACTAM	BETA-LACTAM	HMM	271	274	100	38.35	279	WP_063862740.1	class D beta-lactamase	NF012161.0	class D beta-lactamase	2
GCA_014534325.1	Flavisolibacter sp.	MBD0351556.1	arr	NAD(+)--rifampin ADP-ribosyltransferase	core	AMR	AMR	RIFAMYCIN	RIFAMYCIN	HMM	247	150	90.67	48.53	136	WP_052238312.1	NAD(+)--rifampin ADP-ribosyltransferase	NF033144.1	NAD(+)--rifampin ADP-ribosyltransferase	3
GCA_014534525.1	Flavisolibacter sp.	MBD0367587.1	arsN2	arsenic resistance N-acetyltransferase ArsN2	plus	STRESS	METAL	ARSENIC	ARSENIC	HMM	142	164	86.59	38.03	142	ABU58394.1	arsenic resistance N-acetyltransferase ArsN2	NF040501.1	arsenic resistance N-acetyltransferase ArsN2	3
GCA_014534605.1	Flavisolibacter sp.	MBD0378070.1	arr	NAD(+)--rifampin ADP-ribosyltransferase	core	AMR	AMR	RIFAMYCIN	RIFAMYCIN	HMM	247	150	90.67	49.26	136	WP_052238312.1	NAD(+)--rifampin ADP-ribosyltransferase	NF033144.1	NAD(+)--rifampin ADP-ribosyltransferase	3
GCA_014879545.1	Chitinophagaceae bacterium	MBE2288855.1	arsD	arsenite efflux transporter metallochaperone ArsD	plus	STRESS	METAL	ARSENIC	ARSENITE	HMM	130	120	97.5	34.11	129	AAB09625.1	arsenite efflux transporter metallochaperone ArsD	NF033727.2	arsenite efflux transporter metallochaperone ArsD	1
GCA_015069765.1	Parafilimonas terrae	MBE7196470.1	bla	class A beta-lactamase	core	AMR	AMR	BETA-LACTAM	BETA-LACTAM	HMM	289	304	98.68	47.56	307	WP_060005294.1	class A beta-lactamase	NF033103.1	class A beta-lactamase	4
GCA_015069765.1	Parafilimonas terrae	MBE7197007.1	bla	class A beta-lactamase	core	AMR	AMR	BETA-LACTAM	BETA-LACTAM	HMM	293	305	98.03	47.04	304	WP_010926363.1	class A beta-lactamase	NF033103.1	class A beta-lactamase	4
GCA_015831355.1	Panacibacter microcysteis	MBG9374641.1	arsN2	arsenic resistance N-acetyltransferase ArsN2	plus	STRESS	METAL	ARSENIC	ARSENIC	HMM	151	164	79.88	41.98	131	ABU58394.1	arsenic resistance N-acetyltransferase ArsN2	NF040501.1	arsenic resistance N-acetyltransferase ArsN2	4
GCA_015831355.1	Panacibacter microcysteis	MBG9376133.1	bla	subclass B3 metallo-beta-lactamase	core	AMR	AMR	BETA-LACTAM	BETA-LACTAM	HMM	283	286	96.15	62.59	278	WP_063864590.1	subclass B3 metallo-beta-lactamase	NF033105.1	subclass B3 metallo-beta-lactamase	4
GCA_016704945.1	Chitinophagaceae bacterium	MBK6378706.1	arsN2	arsenic resistance N-acetyltransferase ArsN2	plus	STRESS	METAL	ARSENIC	ARSENIC	HMM	150	144	99.31	33.57	143	KTT96020.1	arsenic resistance N-acetyltransferase ArsN2	NF040501.1	arsenic resistance N-acetyltransferase ArsN2	2
GCA_016704945.1	Chitinophagaceae bacterium	MBK6380488.1	blaOXA	class D beta-lactamase	core	AMR	AMR	BETA-LACTAM	BETA-LACTAM	HMM	272	267	95.51	39.7	267	WP_003235647.1	class D beta-lactamase	NF012161.0	class D beta-lactamase	2
GCA_016704945.1	Chitinophagaceae bacterium	MBK6381338.1	bla	BlaB/IND/MUS family subclass B1 metallo-beta-lactamase	core	AMR	AMR	BETA-LACTAM	BETA-LACTAM	HMM	245	241	98.34	56.49	239	WP_148044405.1	BlaB/IND/MUS family subclass B1 metallo-beta-lactamase	NF012146.1	BlaB/IND/MUS family subclass B1 metallo-beta-lactamase	3
GCA_016704945.1	Chitinophagaceae bacterium	MBK6381761.1	bla	class A beta-lactamase, subclass A2	core	AMR	AMR	BETA-LACTAM	BETA-LACTAM	HMM	290	290	98.62	50.35	288	WP_061710074.1	class A beta-lactamase, subclass A2	NF012099.1	class A beta-lactamase, subclass A2	3
GCA_016704985.1	Chitinophagaceae bacterium	MBK6385086.1	bla	BlaB/IND/MUS family subclass B1 metallo-beta-lactamase	core	AMR	AMR	BETA-LACTAM	BETA-LACTAM	HMM	245	241	97.93	53.33	240	WP_148044405.1	BlaB/IND/MUS family subclass B1 metallo-beta-lactamase	NF012146.1	BlaB/IND/MUS family subclass B1 metallo-beta-lactamase	3
GCA_016704325.1	Chitinophagaceae bacterium	MBK6482531.1	blaOXA	class D beta-lactamase	core	AMR	AMR	BETA-LACTAM	BETA-LACTAM	HMM	329	289	84.43	45.06	253	WP_075071939.1	class D beta-lactamase	NF012161.0	class D beta-lactamase	1
GCA_016704325.1	Chitinophagaceae bacterium	MBK6485179.1	arr	NAD(+)--rifampin ADP-ribosyltransferase	core	AMR	AMR	RIFAMYCIN	RIFAMYCIN	HMM	138	137	94.16	56.59	129	WP_012695486.1	NAD(+)--rifampin ADP-ribosyltransferase	NF033144.1	NAD(+)--rifampin ADP-ribosyltransferase	2
GCA_016703775.1	Chitinophagaceae bacterium	MBK6625068.1	bla	BlaB/IND/MUS family subclass B1 metallo-beta-lactamase	core	AMR	AMR	BETA-LACTAM	BETA-LACTAM	HMM	247	248	94.76	52.34	235	WP_012025466.1	BlaB/IND/MUS family subclass B1 metallo-beta-lactamase	NF012146.1	BlaB/IND/MUS family subclass B1 metallo-beta-lactamase	2
GCA_016703625.1	Chitinophagaceae bacterium	MBK6633388.1	blaOXA	class D beta-lactamase	core	AMR	AMR	BETA-LACTAM	BETA-LACTAM	HMM	272	267	85.77	41.25	240	WP_003235647.1	class D beta-lactamase	NF012161.0	class D beta-lactamase	4
GCA_016702745.1	Chitinophagaceae bacterium	MBK6825590.1	arsN1	arsinothricin resistance N-acetyltransferase ArsN1 family B	plus	STRESS	METAL	ARSENIC	ARSENIC	HMM	197	186	93.55	47.7	174	AAN67541.1	arsinothricin resistance N-acetyltransferase ArsN1 family B	NF040504.1	arsinothricin resistance N-acetyltransferase ArsN1 family B	4
GCA_016708765.1	Chitinophagaceae bacterium	MBK6991131.1	bla	subclass B1 metallo-beta-lactamase	core	AMR	AMR	BETA-LACTAM	BETA-LACTAM	HMM	252	252	100	71.03	252	WP_202272142.1	subclass B1 metallo-beta-lactamase	NF033088.2	subclass B1 metallo-beta-lactamase	4
GCA_016708765.1	Chitinophagaceae bacterium	MBK6992324.1	arsN1	arsinothricin resistance N-acetyltransferase ArsN1 family B	plus	STRESS	METAL	ARSENIC	ARSENIC	HMM	196	186	92.47	45.93	172	AAN67541.1	arsinothricin resistance N-acetyltransferase ArsN1 family B	NF040504.1	arsinothricin resistance N-acetyltransferase ArsN1 family B	4
GCA_016708275.1	Chitinophagaceae bacterium	MBK7088490.1	bla	BlaB/IND/MUS family subclass B1 metallo-beta-lactamase	core	AMR	AMR	BETA-LACTAM	BETA-LACTAM	HMM	247	241	97.93	52.74	237	WP_148044405.1	BlaB/IND/MUS family subclass B1 metallo-beta-lactamase	NF012146.1	BlaB/IND/MUS family subclass B1 metallo-beta-lactamase	6
GCA_016708085.1	Chitinophagaceae bacterium	MBK7122177.1	blaOXA	class D beta-lactamase	core	AMR	AMR	BETA-LACTAM	BETA-LACTAM	HMM	278	267	85.77	41.25	240	WP_003235647.1	class D beta-lactamase	NF012161.0	class D beta-lactamase	6
GCA_016706055.1	Chitinophagaceae bacterium	MBK7289597.1	arsD	arsenite efflux transporter metallochaperone ArsD	plus	STRESS	METAL	ARSENIC	ARSENITE	HMM	129	123	98.37	33.85	130	EGJ25782.1	arsenite efflux transporter metallochaperone ArsD	NF033727.2	arsenite efflux transporter metallochaperone ArsD	6
GCA_016706055.1	Chitinophagaceae bacterium	MBK7289679.1	arsN1	arsinothricin resistance N-acetyltransferase ArsN1 family B	plus	STRESS	METAL	ARSENIC	ARSENIC	HMM	197	186	92.47	46.51	172	AAN67541.1	arsinothricin resistance N-acetyltransferase ArsN1 family B	NF040504.1	arsinothricin resistance N-acetyltransferase ArsN1 family B	6
GCA_016705765.1	Chitinophagaceae bacterium	MBK7308275.1	bla	BlaB/IND/MUS family subclass B1 metallo-beta-lactamase	core	AMR	AMR	BETA-LACTAM	BETA-LACTAM	HMM	245	241	98.34	56.49	239	WP_148044405.1	BlaB/IND/MUS family subclass B1 metallo-beta-lactamase	NF012146.1	BlaB/IND/MUS family subclass B1 metallo-beta-lactamase	6
GCA_016705765.1	Chitinophagaceae bacterium	MBK7308381.1	blaOXA	class D beta-lactamase	core	AMR	AMR	BETA-LACTAM	BETA-LACTAM	HMM	272	267	95.51	39.7	267	WP_003235647.1	class D beta-lactamase	NF012161.0	class D beta-lactamase	6
GCA_016705765.1	Chitinophagaceae bacterium	MBK7308905.1	bla	class A beta-lactamase	core	AMR	AMR	BETA-LACTAM	BETA-LACTAM	HMM	278	290	92.07	51.3	269	WP_061710074.1	class A beta-lactamase	NF033103.1	class A beta-lactamase	1
GCA_016705635.1	Chitinophagaceae bacterium	MBK7345525.1	bla	BlaB/IND/MUS family subclass B1 metallo-beta-lactamase	core	AMR	AMR	BETA-LACTAM	BETA-LACTAM	HMM	247	248	94.76	52.34	235	WP_012025466.1	BlaB/IND/MUS family subclass B1 metallo-beta-lactamase	NF012146.1	BlaB/IND/MUS family subclass B1 metallo-beta-lactamase	3
GCA_016710165.1	Chitinophagaceae bacterium	MBK7374004.1	bla	BlaB/IND/MUS family subclass B1 metallo-beta-lactamase	core	AMR	AMR	BETA-LACTAM	BETA-LACTAM	HMM	245	241	98.76	55.42	240	WP_148044405.1	BlaB/IND/MUS family subclass B1 metallo-beta-lactamase	NF012146.1	BlaB/IND/MUS family subclass B1 metallo-beta-lactamase	3
GCA_016710165.1	Chitinophagaceae bacterium	MBK7375435.1	arsN2	arsenic resistance N-acetyltransferase ArsN2	plus	STRESS	METAL	ARSENIC	ARSENIC	HMM	148	144	98.61	34.51	142	KTT96020.1	arsenic resistance N-acetyltransferase ArsN2	NF040501.1	arsenic resistance N-acetyltransferase ArsN2	3
GCA_016706245.1	Chitinophagaceae bacterium	MBK7432652.1	blaOXA	class D beta-lactamase	core	AMR	AMR	BETA-LACTAM	BETA-LACTAM	HMM	271	268	94.4	39.39	264	WP_003328240.1	class D beta-lactamase	NF012161.0	class D beta-lactamase	3
GCA_016706495.1	Chitinophagaceae bacterium	MBK7557977.1	blaOXA	class D beta-lactamase	core	AMR	AMR	BETA-LACTAM	BETA-LACTAM	HMM	278	267	85.77	41.25	240	WP_003235647.1	class D beta-lactamase	NF012161.0	class D beta-lactamase	3
GCA_016706495.1	Chitinophagaceae bacterium	MBK7559397.1	bla	BlaB/IND/MUS family subclass B1 metallo-beta-lactamase	core	AMR	AMR	BETA-LACTAM	BETA-LACTAM	HMM	245	241	97.93	57.56	238	WP_148044405.1	BlaB/IND/MUS family subclass B1 metallo-beta-lactamase	NF012146.1	BlaB/IND/MUS family subclass B1 metallo-beta-lactamase	3
GCA_016709685.1	Chitinophagaceae bacterium	MBK7680431.1	bla	BlaB/IND/MUS family subclass B1 metallo-beta-lactamase	core	AMR	AMR	BETA-LACTAM	BETA-LACTAM	HMM	245	241	97.93	53.75	240	WP_148044405.1	BlaB/IND/MUS family subclass B1 metallo-beta-lactamase	NF012146.1	BlaB/IND/MUS family subclass B1 metallo-beta-lactamase	2
GCA_016706785.1	Chitinophagaceae bacterium	MBK7734980.1	bla	BlaB/IND/MUS family subclass B1 metallo-beta-lactamase	core	AMR	AMR	BETA-LACTAM	BETA-LACTAM	HMM	247	248	94.76	51.91	235	WP_012025466.1	BlaB/IND/MUS family subclass B1 metallo-beta-lactamase	NF012146.1	BlaB/IND/MUS family subclass B1 metallo-beta-lactamase	2
GCA_016713965.1	Chitinophagaceae bacterium	MBK7882848.1	blaOXA	class D beta-lactamase	core	AMR	AMR	BETA-LACTAM	BETA-LACTAM	HMM	275	269	98.14	39.03	269	WP_063864099.1	class D beta-lactamase	NF012161.0	class D beta-lactamase	2
GCA_016713965.1	Chitinophagaceae bacterium	MBK7884014.1	bla	BlaB/IND/MUS family subclass B1 metallo-beta-lactamase	core	AMR	AMR	BETA-LACTAM	BETA-LACTAM	HMM	245	248	98.39	54.92	244	WP_012025466.1	BlaB/IND/MUS family subclass B1 metallo-beta-lactamase	NF012146.1	BlaB/IND/MUS family subclass B1 metallo-beta-lactamase	2
GCA_016713085.1	Chitinophagaceae bacterium	MBK8088584.1	bla	BlaB/IND/MUS family subclass B1 metallo-beta-lactamase	core	AMR	AMR	BETA-LACTAM	BETA-LACTAM	HMM	246	241	98.76	54.58	240	WP_148044405.1	BlaB/IND/MUS family subclass B1 metallo-beta-lactamase	NF012146.1	BlaB/IND/MUS family subclass B1 metallo-beta-lactamase	1
GCA_016712725.1	Chitinophagaceae bacterium	MBK8141492.1	bla	subclass B1 metallo-beta-lactamase	core	AMR	AMR	BETA-LACTAM	BETA-LACTAM	HMM	256	266	100	52.63	266	WP_081048762.1	subclass B1 metallo-beta-lactamase	NF033088.2	subclass B1 metallo-beta-lactamase	2
GCA_016712195.1	Chitinophagaceae bacterium	MBK8300774.1	bla	BlaB/IND/MUS family subclass B1 metallo-beta-lactamase	core	AMR	AMR	BETA-LACTAM	BETA-LACTAM	HMM	245	241	97.93	53.33	240	WP_148044405.1	BlaB/IND/MUS family subclass B1 metallo-beta-lactamase	NF012146.1	BlaB/IND/MUS family subclass B1 metallo-beta-lactamase	2
GCA_016711945.1	Chitinophagaceae bacterium	MBK8310708.1	bla	subclass B1 metallo-beta-lactamase	core	AMR	AMR	BETA-LACTAM	BETA-LACTAM	HMM	252	252	100	71.03	252	WP_202272142.1	subclass B1 metallo-beta-lactamase	NF033088.2	subclass B1 metallo-beta-lactamase	1
GCA_016711005.1	Chitinophagaceae bacterium	MBK8493943.1	blaOXA	class D beta-lactamase	core	AMR	AMR	BETA-LACTAM	BETA-LACTAM	HMM	272	267	85.77	41.67	240	WP_003235647.1	class D beta-lactamase	NF012161.0	class D beta-lactamase	1
GCA_016711005.1	Chitinophagaceae bacterium	MBK8494727.1	bla	BlaB/IND/MUS family subclass B1 metallo-beta-lactamase	core	AMR	AMR	BETA-LACTAM	BETA-LACTAM	HMM	244	241	97.93	54.01	237	WP_148044405.1	BlaB/IND/MUS family subclass B1 metallo-beta-lactamase	NF012146.1	BlaB/IND/MUS family subclass B1 metallo-beta-lactamase	2
GCA_016710935.1	Chitinophagaceae bacterium	MBK8520847.1	bla	BlaB/IND/MUS family subclass B1 metallo-beta-lactamase	core	AMR	AMR	BETA-LACTAM	BETA-LACTAM	HMM	243	246	97.15	53.97	239	WP_318245543.1	BlaB/IND/MUS family subclass B1 metallo-beta-lactamase	NF012146.1	BlaB/IND/MUS family subclass B1 metallo-beta-lactamase	2
GCA_016710935.1	Chitinophagaceae bacterium	MBK8521921.1	blaOXA	class D beta-lactamase	core	AMR	AMR	BETA-LACTAM	BETA-LACTAM	HMM	279	258	96.12	40.47	257	WP_004919358.1	class D beta-lactamase	NF012161.0	class D beta-lactamase	1
GCA_016714865.1	Chitinophagaceae bacterium	MBK8606886.1	arsN1	arsinothricin resistance N-acetyltransferase ArsN1 family B	plus	STRESS	METAL	ARSENIC	ARSENIC	HMM	196	186	92.47	46.51	172	AAN67541.1	arsinothricin resistance N-acetyltransferase ArsN1 family B	NF040504.1	arsinothricin resistance N-acetyltransferase ArsN1 family B	2
GCA_016714865.1	Chitinophagaceae bacterium	MBK8607313.1	bla	subclass B1 metallo-beta-lactamase	core	AMR	AMR	BETA-LACTAM	BETA-LACTAM	HMM	252	252	100	71.03	252	WP_202272142.1	subclass B1 metallo-beta-lactamase	NF033088.2	subclass B1 metallo-beta-lactamase	2
GCA_016710745.1	Chitinophagaceae bacterium	MBK8609871.1	blaOXA	class D beta-lactamase	core	AMR	AMR	BETA-LACTAM	BETA-LACTAM	HMM	285	267	92.51	39.77	259	WP_003235647.1	class D beta-lactamase	NF012161.0	class D beta-lactamase	1
GCA_016710745.1	Chitinophagaceae bacterium	MBK8610011.1	bla	BlaB/IND/MUS family subclass B1 metallo-beta-lactamase	core	AMR	AMR	BETA-LACTAM	BETA-LACTAM	HMM	246	248	94.76	52.52	238	WP_012025466.1	BlaB/IND/MUS family subclass B1 metallo-beta-lactamase	NF012146.1	BlaB/IND/MUS family subclass B1 metallo-beta-lactamase	2
GCA_016710595.1	Niastella sp.	MBK8711585.1	bla	BlaB/IND/MUS family subclass B1 metallo-beta-lactamase	core	AMR	AMR	BETA-LACTAM	BETA-LACTAM	HMM	245	248	98.39	50.82	244	WP_012025466.1	BlaB/IND/MUS family subclass B1 metallo-beta-lactamase	NF012146.1	BlaB/IND/MUS family subclass B1 metallo-beta-lactamase	2
GCA_016710595.1	Niastella sp.	MBK8712508.1	blaOXA	class D beta-lactamase	core	AMR	AMR	BETA-LACTAM	BETA-LACTAM	HMM	275	262	97.71	38.55	275	WP_041816295.1	class D beta-lactamase	NF012161.0	class D beta-lactamase	1
GCA_016710395.1	Chitinophagaceae bacterium	MBK8775722.1	bla	BlaB/IND/MUS family subclass B1 metallo-beta-lactamase	core	AMR	AMR	BETA-LACTAM	BETA-LACTAM	HMM	247	248	100	50.81	248	WP_012025466.1	BlaB/IND/MUS family subclass B1 metallo-beta-lactamase	NF012146.1	BlaB/IND/MUS family subclass B1 metallo-beta-lactamase	1
GCA_016715365.1	Chitinophagaceae bacterium	MBK8785017.1	arsN2	arsenic resistance N-acetyltransferase ArsN2	plus	STRESS	METAL	ARSENIC	ARSENIC	HMM	150	144	99.31	33.57	143	KTT96020.1	arsenic resistance N-acetyltransferase ArsN2	NF040501.1	arsenic resistance N-acetyltransferase ArsN2	1
GCA_016715365.1	Chitinophagaceae bacterium	MBK8785884.1	blaOXA	class D beta-lactamase	core	AMR	AMR	BETA-LACTAM	BETA-LACTAM	HMM	272	267	95.51	39.7	267	WP_003235647.1	class D beta-lactamase	NF012161.0	class D beta-lactamase	1
GCA_016719995.1	Chitinophagaceae bacterium	MBK8930111.1	bla	BlaB/IND/MUS family subclass B1 metallo-beta-lactamase	core	AMR	AMR	BETA-LACTAM	BETA-LACTAM	HMM	247	241	97.93	51.9	237	WP_148044405.1	BlaB/IND/MUS family subclass B1 metallo-beta-lactamase	NF012146.1	BlaB/IND/MUS family subclass B1 metallo-beta-lactamase	3
GCA_016719165.1	Chitinophagaceae bacterium	MBK9379812.1	arsN1	arsinothricin resistance N-acetyltransferase ArsN1 family B	plus	STRESS	METAL	ARSENIC	ARSENIC	HMM	195	186	92.47	44.77	172	AAN67541.1	arsinothricin resistance N-acetyltransferase ArsN1 family B	NF040504.1	arsinothricin resistance N-acetyltransferase ArsN1 family B	3
GCA_016719165.1	Chitinophagaceae bacterium	MBK9379999.1	bla	subclass B1 metallo-beta-lactamase	core	AMR	AMR	BETA-LACTAM	BETA-LACTAM	HMM	252	252	100	69.05	252	WP_202272142.1	subclass B1 metallo-beta-lactamase	NF033088.2	subclass B1 metallo-beta-lactamase	3
GCA_016719015.1	Chitinophagaceae bacterium	MBK9465729.1	bla	BlaB/IND/MUS family subclass B1 metallo-beta-lactamase	core	AMR	AMR	BETA-LACTAM	BETA-LACTAM	HMM	245	241	97.93	53.33	240	WP_148044405.1	BlaB/IND/MUS family subclass B1 metallo-beta-lactamase	NF012146.1	BlaB/IND/MUS family subclass B1 metallo-beta-lactamase	1
GCA_016718745.1	Chitinophagaceae bacterium	MBK9484213.1	arsN2	arsenic resistance N-acetyltransferase ArsN2	plus	STRESS	METAL	ARSENIC	ARSENIC	HMM	150	144	99.31	33.57	143	KTT96020.1	arsenic resistance N-acetyltransferase ArsN2	NF040501.1	arsenic resistance N-acetyltransferase ArsN2	2
GCA_016718745.1	Chitinophagaceae bacterium	MBK9485151.1	bla	BlaB/IND/MUS family subclass B1 metallo-beta-lactamase	core	AMR	AMR	BETA-LACTAM	BETA-LACTAM	HMM	245	241	98.34	56.49	239	WP_148044405.1	BlaB/IND/MUS family subclass B1 metallo-beta-lactamase	NF012146.1	BlaB/IND/MUS family subclass B1 metallo-beta-lactamase	2
GCA_016718745.1	Chitinophagaceae bacterium	MBK9485199.1	blaOXA	class D beta-lactamase	core	AMR	AMR	BETA-LACTAM	BETA-LACTAM	HMM	272	267	95.51	39.7	267	WP_003235647.1	class D beta-lactamase	NF012161.0	class D beta-lactamase	1
GCA_016718105.1	Chitinophagaceae bacterium	MBK9531670.1	blaOXA	class D beta-lactamase	core	AMR	AMR	BETA-LACTAM	BETA-LACTAM	HMM	278	267	85.77	41.25	240	WP_003235647.1	class D beta-lactamase	NF012161.0	class D beta-lactamase	6
GCA_016718105.1	Chitinophagaceae bacterium	MBK9532176.1	bla	BlaB/IND/MUS family subclass B1 metallo-beta-lactamase	core	AMR	AMR	BETA-LACTAM	BETA-LACTAM	HMM	245	241	97.93	57.14	238	WP_148044405.1	BlaB/IND/MUS family subclass B1 metallo-beta-lactamase	NF012146.1	BlaB/IND/MUS family subclass B1 metallo-beta-lactamase	6
GCA_016717985.1	Chitinophagaceae bacterium	MBK9568812.1	bla	BlaB/IND/MUS family subclass B1 metallo-beta-lactamase	core	AMR	AMR	BETA-LACTAM	BETA-LACTAM	HMM	270	241	98.76	56.25	240	WP_148044405.1	BlaB/IND/MUS family subclass B1 metallo-beta-lactamase	NF012146.1	BlaB/IND/MUS family subclass B1 metallo-beta-lactamase	6
GCA_016717645.1	Chitinophagaceae bacterium	MBK9661072.1	bla	BlaB/IND/MUS family subclass B1 metallo-beta-lactamase	core	AMR	AMR	BETA-LACTAM	BETA-LACTAM	HMM	245	241	97.93	53.75	240	WP_148044405.1	BlaB/IND/MUS family subclass B1 metallo-beta-lactamase	NF012146.1	BlaB/IND/MUS family subclass B1 metallo-beta-lactamase	6
GCA_016717285.1	Chitinophagaceae bacterium	MBK9730630.1	blaOXA	class D beta-lactamase	core	AMR	AMR	BETA-LACTAM	BETA-LACTAM	HMM	283	289	82.7	45.16	248	WP_075071939.1	class D beta-lactamase	NF012161.0	class D beta-lactamase	6
GCA_016717285.1	Chitinophagaceae bacterium	MBK9732335.1	arr	NAD(+)--rifampin ADP-ribosyltransferase	core	AMR	AMR	RIFAMYCIN	RIFAMYCIN	HMM	148	137	97.08	58.65	133	WP_012695486.1	NAD(+)--rifampin ADP-ribosyltransferase	NF033144.1	NAD(+)--rifampin ADP-ribosyltransferase	6
GCA_016722245.1	Chitinophagaceae bacterium	MBK9938678.1	bla	BlaB/IND/MUS family subclass B1 metallo-beta-lactamase	core	AMR	AMR	BETA-LACTAM	BETA-LACTAM	HMM	245	241	97.93	53.33	240	WP_148044405.1	BlaB/IND/MUS family subclass B1 metallo-beta-lactamase	NF012146.1	BlaB/IND/MUS family subclass B1 metallo-beta-lactamase	6
GCA_016722125.1	Chitinophagaceae bacterium	MBK9959355.1	bla	BlaB/IND/MUS family subclass B1 metallo-beta-lactamase	core	AMR	AMR	BETA-LACTAM	BETA-LACTAM	HMM	247	248	100	50.4	248	WP_012025466.1	BlaB/IND/MUS family subclass B1 metallo-beta-lactamase	NF012146.1	BlaB/IND/MUS family subclass B1 metallo-beta-lactamase	6
GCA_016721725.1	Chitinophagaceae bacterium	MBL0054834.1	blaOXA	class D beta-lactamase	core	AMR	AMR	BETA-LACTAM	BETA-LACTAM	HMM	271	268	94.4	39.39	264	WP_003328240.1	class D beta-lactamase	NF012161.0	class D beta-lactamase	6
GCA_016721575.1	Chitinophagaceae bacterium	MBL0068360.1	arsN2	arsenic resistance N-acetyltransferase ArsN2	plus	STRESS	METAL	ARSENIC	ARSENIC	HMM	277	142	92.96	30.3	132	ABB05616.1	arsenic resistance N-acetyltransferase ArsN2	NF040501.1	arsenic resistance N-acetyltransferase ArsN2	6
GCA_016721575.1	Chitinophagaceae bacterium	MBL0069831.1	bla	BlaB/IND/MUS family subclass B1 metallo-beta-lactamase	core	AMR	AMR	BETA-LACTAM	BETA-LACTAM	HMM	245	241	97.93	53.33	240	WP_148044405.1	BlaB/IND/MUS family subclass B1 metallo-beta-lactamase	NF012146.1	BlaB/IND/MUS family subclass B1 metallo-beta-lactamase	6
GCA_016721515.1	Chitinophagaceae bacterium	MBL0130734.1	bla	BlaB/IND/MUS family subclass B1 metallo-beta-lactamase	core	AMR	AMR	BETA-LACTAM	BETA-LACTAM	HMM	270	241	98.76	56.25	240	WP_148044405.1	BlaB/IND/MUS family subclass B1 metallo-beta-lactamase	NF012146.1	BlaB/IND/MUS family subclass B1 metallo-beta-lactamase	6
GCA_016721385.1	Chitinophagaceae bacterium	MBL0144397.1	bla	class A beta-lactamase, subclass A2	core	AMR	AMR	BETA-LACTAM	BETA-LACTAM	HMM	294	295	96.61	51.22	287	WP_064964747.1	class A beta-lactamase, subclass A2	NF012099.1	class A beta-lactamase, subclass A2	2
GCA_016720825.1	Chitinophagaceae bacterium	MBL0153857.1	arsN2	arsenic resistance N-acetyltransferase ArsN2	plus	STRESS	METAL	ARSENIC	ARSENIC	HMM	277	142	97.18	30.43	138	ABB05616.1	arsenic resistance N-acetyltransferase ArsN2	NF040501.1	arsenic resistance N-acetyltransferase ArsN2	2
GCA_016720825.1	Chitinophagaceae bacterium	MBL0154518.1	arsN1	arsinothricin resistance N-acetyltransferase ArsN1 family B	plus	STRESS	METAL	ARSENIC	ARSENIC	HMM	194	186	93.55	44.25	174	AAN67541.1	arsinothricin resistance N-acetyltransferase ArsN1 family B	NF040504.1	arsinothricin resistance N-acetyltransferase ArsN1 family B	2
GCA_016720775.1	Chitinophagaceae bacterium	MBL0181358.1	blaOXA	class D beta-lactamase	core	AMR	AMR	BETA-LACTAM	BETA-LACTAM	HMM	271	262	98.85	38.89	270	WP_041816295.1	class D beta-lactamase	NF012161.0	class D beta-lactamase	2
GCA_016720775.1	Chitinophagaceae bacterium	MBL0182185.1	arsN2	arsenic resistance N-acetyltransferase ArsN2	plus	STRESS	METAL	ARSENIC	ARSENIC	HMM	150	147	85.03	32	125	ABG05788.1	arsenic resistance N-acetyltransferase ArsN2	NF040501.1	arsenic resistance N-acetyltransferase ArsN2	4
GCA_016720775.1	Chitinophagaceae bacterium	MBL0183121.1	bla	subclass B3 metallo-beta-lactamase	core	AMR	AMR	BETA-LACTAM	BETA-LACTAM	HMM	290	293	97.27	67.02	285	WP_063842707.1	subclass B3 metallo-beta-lactamase	NF033105.1	subclass B3 metallo-beta-lactamase	4
GCA_016721065.1	Chitinophagaceae bacterium	MBL0198816.1	arsN2	arsenic resistance N-acetyltransferase ArsN2	plus	STRESS	METAL	ARSENIC	ARSENIC	HMM	150	144	99.31	33.57	143	KTT96020.1	arsenic resistance N-acetyltransferase ArsN2	NF040501.1	arsenic resistance N-acetyltransferase ArsN2	4
GCA_016721065.1	Chitinophagaceae bacterium	MBL0199768.1	blaOXA	class D beta-lactamase	core	AMR	AMR	BETA-LACTAM	BETA-LACTAM	HMM	272	267	95.51	39.7	267	WP_003235647.1	class D beta-lactamase	NF012161.0	class D beta-lactamase	4
GCA_016721065.1	Chitinophagaceae bacterium	MBL0201513.1	bla	BlaB/IND/MUS family subclass B1 metallo-beta-lactamase	core	AMR	AMR	BETA-LACTAM	BETA-LACTAM	HMM	245	241	98.34	56.49	239	WP_148044405.1	BlaB/IND/MUS family subclass B1 metallo-beta-lactamase	NF012146.1	BlaB/IND/MUS family subclass B1 metallo-beta-lactamase	3
GCA_016720565.1	Chitinophagaceae bacterium	MBL0233614.1	bla	BlaB/IND/MUS family subclass B1 metallo-beta-lactamase	core	AMR	AMR	BETA-LACTAM	BETA-LACTAM	HMM	251	246	95.93	55.6	241	WP_318245543.1	BlaB/IND/MUS family subclass B1 metallo-beta-lactamase	NF012146.1	BlaB/IND/MUS family subclass B1 metallo-beta-lactamase	3
GCA_016720565.1	Chitinophagaceae bacterium	MBL0234764.1	arsN1	arsinothricin resistance N-acetyltransferase ArsN1 family B	plus	STRESS	METAL	ARSENIC	ARSENIC	HMM	182	186	92.47	49.42	172	AAN67541.1	arsinothricin resistance N-acetyltransferase ArsN1 family B	NF040504.1	arsinothricin resistance N-acetyltransferase ArsN1 family B	3
GCA_016720195.1	Chitinophagaceae bacterium	MBL0255635.1	bla	BlaB/IND/MUS family subclass B1 metallo-beta-lactamase	core	AMR	AMR	BETA-LACTAM	BETA-LACTAM	HMM	247	248	100	50.4	248	WP_012025466.1	BlaB/IND/MUS family subclass B1 metallo-beta-lactamase	NF012146.1	BlaB/IND/MUS family subclass B1 metallo-beta-lactamase	1
GCA_016720745.1	Chitinophagaceae bacterium	MBL0269788.1	arsN1	arsinothricin resistance N-acetyltransferase ArsN1 family B	plus	STRESS	METAL	ARSENIC	ARSENIC	HMM	197	186	93.55	48.85	174	AAN67541.1	arsinothricin resistance N-acetyltransferase ArsN1 family B	NF040504.1	arsinothricin resistance N-acetyltransferase ArsN1 family B	1
GCA_016720745.1	Chitinophagaceae bacterium	MBL0270080.1	bla	class A beta-lactamase, subclass A2	core	AMR	AMR	BETA-LACTAM	BETA-LACTAM	HMM	293	299	99	47.65	298	WP_160164840.1	class A beta-lactamase, subclass A2	NF012099.1	class A beta-lactamase, subclass A2	1
GCA_016720585.1	Chitinophagaceae bacterium	MBL0274180.1	bla	BlaB/IND/MUS family subclass B1 metallo-beta-lactamase	core	AMR	AMR	BETA-LACTAM	BETA-LACTAM	HMM	270	241	98.76	55.83	240	WP_148044405.1	BlaB/IND/MUS family subclass B1 metallo-beta-lactamase	NF012146.1	BlaB/IND/MUS family subclass B1 metallo-beta-lactamase	1
GCA_016720155.1	Chitinophagaceae bacterium	MBL0304571.1	arsN1	arsinothricin resistance N-acetyltransferase ArsN1 family B	plus	STRESS	METAL	ARSENIC	ARSENIC	HMM	195	186	92.47	44.77	172	AAN67541.1	arsinothricin resistance N-acetyltransferase ArsN1 family B	NF040504.1	arsinothricin resistance N-acetyltransferase ArsN1 family B	3
GCA_016722395.1	Chitinophagaceae bacterium	MBL0334856.1	arsN1	arsinothricin resistance N-acetyltransferase ArsN1 family B	plus	STRESS	METAL	ARSENIC	ARSENIC	HMM	196	186	94.09	45.71	175	AAN67541.1	arsinothricin resistance N-acetyltransferase ArsN1 family B	NF040504.1	arsinothricin resistance N-acetyltransferase ArsN1 family B	3
GCA_016722395.1	Chitinophagaceae bacterium	MBL0336877.1	bla	BlaB/IND/MUS family subclass B1 metallo-beta-lactamase	core	AMR	AMR	BETA-LACTAM	BETA-LACTAM	HMM	243	248	97.58	50.41	242	WP_012025466.1	BlaB/IND/MUS family subclass B1 metallo-beta-lactamase	NF012146.1	BlaB/IND/MUS family subclass B1 metallo-beta-lactamase	3
GCA_016722465.1	Chitinophagaceae bacterium	MBL0357648.1	arsN2	arsenic resistance N-acetyltransferase ArsN2	plus	STRESS	METAL	ARSENIC	ARSENIC	HMM	150	164	81.1	37.59	133	ABU58394.1	arsenic resistance N-acetyltransferase ArsN2	NF040501.1	arsenic resistance N-acetyltransferase ArsN2	1
GCA_016722465.1	Chitinophagaceae bacterium	MBL0359091.1	bla	BlaB/IND/MUS family subclass B1 metallo-beta-lactamase	core	AMR	AMR	BETA-LACTAM	BETA-LACTAM	HMM	245	241	97.93	55.46	238	WP_148044405.1	BlaB/IND/MUS family subclass B1 metallo-beta-lactamase	NF012146.1	BlaB/IND/MUS family subclass B1 metallo-beta-lactamase	1
GCA_016741945.1	Chitinophagaceae bacterium	MBL0883218.1	bla	BlaB/IND/MUS family subclass B1 metallo-beta-lactamase	core	AMR	AMR	BETA-LACTAM	BETA-LACTAM	HMM	245	241	96.68	50.64	233	WP_148044405.1	BlaB/IND/MUS family subclass B1 metallo-beta-lactamase	NF012146.1	BlaB/IND/MUS family subclass B1 metallo-beta-lactamase	2
GCA_016741945.1	Chitinophagaceae bacterium	MBL0884152.1	aac(6')	aminoglycoside 6'-N-acetyltransferase	core	AMR	AMR	AMINOGLYCOSIDE	AMINOGLYCOSIDE	HMM	151	144	100	40.28	144	WP_058699631.1	aminoglycoside 6'-N-acetyltransferase	NF043067.1	aminoglycoside 6'-N-acetyltransferase	2
GCA_016786615.1	Flavipsychrobacter sp.	MBL7681855.1	bla	class A beta-lactamase	core	AMR	AMR	BETA-LACTAM	BETA-LACTAM	HMM	307	301	98.34	36.96	303	WP_032494759.1	class A beta-lactamase	NF033103.1	class A beta-lactamase	1
GCA_016786615.1	Flavipsychrobacter sp.	MBL7682474.1	bla	BlaB/IND/MUS family subclass B1 metallo-beta-lactamase	core	AMR	AMR	BETA-LACTAM	BETA-LACTAM	HMM	239	237	97.89	47.88	236	WP_063864592.1	BlaB/IND/MUS family subclass B1 metallo-beta-lactamase	NF012146.1	BlaB/IND/MUS family subclass B1 metallo-beta-lactamase	1
GCA_016786565.1	Flavipsychrobacter sp.	MBL7690816.1	arsD	arsenite efflux transporter metallochaperone ArsD	plus	STRESS	METAL	ARSENIC	ARSENITE	HMM	130	120	97.5	37.21	129	AAB09625.1	arsenite efflux transporter metallochaperone ArsD	NF033727.2	arsenite efflux transporter metallochaperone ArsD	1
GCA_016786685.1	Ferruginibacter sp.	MBL7694755.1	blaOXA	class D beta-lactamase	core	AMR	AMR	BETA-LACTAM	BETA-LACTAM	HMM	273	267	95.13	41.51	265	WP_003235647.1	class D beta-lactamase	NF012161.0	class D beta-lactamase	3
GCA_016786685.1	Ferruginibacter sp.	MBL7695087.1	bla	BlaB/IND/MUS family subclass B1 metallo-beta-lactamase	core	AMR	AMR	BETA-LACTAM	BETA-LACTAM	HMM	245	241	92.95	57.33	225	WP_148044405.1	BlaB/IND/MUS family subclass B1 metallo-beta-lactamase	NF012146.1	BlaB/IND/MUS family subclass B1 metallo-beta-lactamase	3
GCA_016786685.1	Ferruginibacter sp.	MBL7696269.1	arsN2	arsenic resistance N-acetyltransferase ArsN2	plus	STRESS	METAL	ARSENIC	ARSENIC	HMM	148	144	94.44	36.76	136	KTT96020.1	arsenic resistance N-acetyltransferase ArsN2	NF040501.1	arsenic resistance N-acetyltransferase ArsN2	3
GCA_016786745.1	Chitinophagaceae bacterium	MBL7698989.1	bla	subclass B3 metallo-beta-lactamase	core	AMR	AMR	BETA-LACTAM	BETA-LACTAM	HMM	289	300	96	55.9	288	WP_063842717.1	subclass B3 metallo-beta-lactamase	NF033105.1	subclass B3 metallo-beta-lactamase	3
GCA_016786725.1	Ferruginibacter sp.	MBL7701664.1	arsN2	arsenic resistance N-acetyltransferase ArsN2	plus	STRESS	METAL	ARSENIC	ARSENIC	HMM	150	144	94.44	34.56	136	KTT96020.1	arsenic resistance N-acetyltransferase ArsN2	NF040501.1	arsenic resistance N-acetyltransferase ArsN2	3
GCA_016786725.1	Ferruginibacter sp.	MBL7702452.1	blaOXA	class D beta-lactamase	core	AMR	AMR	BETA-LACTAM	BETA-LACTAM	HMM	286	268	98.13	39.05	274	WP_003328240.1	class D beta-lactamase	NF012161.0	class D beta-lactamase	3
GCA_016786725.1	Ferruginibacter sp.	MBL7703838.1	bla	BlaB/IND/MUS family subclass B1 metallo-beta-lactamase	core	AMR	AMR	BETA-LACTAM	BETA-LACTAM	HMM	247	241	100	51.24	242	WP_148044405.1	BlaB/IND/MUS family subclass B1 metallo-beta-lactamase	NF012146.1	BlaB/IND/MUS family subclass B1 metallo-beta-lactamase	3
GCA_016786705.1	Taibaiella sp.	MBL7706146.1	bla	subclass B1 metallo-beta-lactamase	core	AMR	AMR	BETA-LACTAM	BETA-LACTAM	HMM	265	253	100	44.27	262	WP_119059468.1	subclass B1 metallo-beta-lactamase	NF033088.2	subclass B1 metallo-beta-lactamase	3
GCA_016786705.1	Taibaiella sp.	MBL7706567.1	arr	NAD(+)--rifampin ADP-ribosyltransferase	core	AMR	AMR	RIFAMYCIN	RIFAMYCIN	HMM	247	150	80.67	51.24	121	WP_063857694.1	NAD(+)--rifampin ADP-ribosyltransferase	NF033144.1	NAD(+)--rifampin ADP-ribosyltransferase	3
GCA_016786805.1	Chitinophagaceae bacterium	MBL7708499.1	arsN1	arsinothricin resistance N-acetyltransferase ArsN1 family B	plus	STRESS	METAL	ARSENIC	ARSENIC	HMM	186	186	95.7	44.38	178	AAN67541.1	arsinothricin resistance N-acetyltransferase ArsN1 family B	NF040504.1	arsinothricin resistance N-acetyltransferase ArsN1 family B	2
GCA_016786805.1	Chitinophagaceae bacterium	MBL7710742.1	bla	subclass B1 metallo-beta-lactamase	core	AMR	AMR	BETA-LACTAM	BETA-LACTAM	HMM	252	252	100	63.89	252	WP_202272142.1	subclass B1 metallo-beta-lactamase	NF033088.2	subclass B1 metallo-beta-lactamase	2
GCA_016786525.1	Chitinophagaceae bacterium	MBL7712192.1	bla	class A beta-lactamase, subclass A2	core	AMR	AMR	BETA-LACTAM	BETA-LACTAM	HMM	299	304	99.67	44.44	306	WP_064964607.1	class A beta-lactamase, subclass A2	NF012099.1	class A beta-lactamase, subclass A2	2
GCA_016786665.1	Flavipsychrobacter sp.	MBL7719105.1	arr	NAD(+)--rifampin ADP-ribosyltransferase	core	AMR	AMR	RIFAMYCIN	RIFAMYCIN	HMM	141	150	94.67	54.23	142	WP_052238312.1	NAD(+)--rifampin ADP-ribosyltransferase	NF033144.1	NAD(+)--rifampin ADP-ribosyltransferase	2
GCA_016786905.1	Chitinophagaceae bacterium	MBL7721387.1	arsN1	arsinothricin resistance N-acetyltransferase ArsN1 family B	plus	STRESS	METAL	ARSENIC	ARSENIC	HMM	159	186	83.87	50.64	156	AAN67541.1	arsinothricin resistance N-acetyltransferase ArsN1 family B	NF040504.1	arsinothricin resistance N-acetyltransferase ArsN1 family B	1
GCA_016786885.1	Chitinophagaceae bacterium	MBL7722608.1	bla	BlaB/IND/MUS family subclass B1 metallo-beta-lactamase	core	AMR	AMR	BETA-LACTAM	BETA-LACTAM	HMM	247	248	99.6	53.04	247	WP_012025466.1	BlaB/IND/MUS family subclass B1 metallo-beta-lactamase	NF012146.1	BlaB/IND/MUS family subclass B1 metallo-beta-lactamase	2
GCA_016786825.1	Dinghuibacter sp.	MBL7726788.1	bla	BlaB/IND/MUS family subclass B1 metallo-beta-lactamase	core	AMR	AMR	BETA-LACTAM	BETA-LACTAM	HMM	224	246	87.8	56.48	216	WP_318245543.1	BlaB/IND/MUS family subclass B1 metallo-beta-lactamase	NF012146.1	BlaB/IND/MUS family subclass B1 metallo-beta-lactamase	2
GCA_016787125.1	Chitinophagaceae bacterium	MBL7731091.1	bla	BlaB/IND/MUS family subclass B1 metallo-beta-lactamase	core	AMR	AMR	BETA-LACTAM	BETA-LACTAM	HMM	248	248	96.37	50.61	245	WP_012025466.1	BlaB/IND/MUS family subclass B1 metallo-beta-lactamase	NF012146.1	BlaB/IND/MUS family subclass B1 metallo-beta-lactamase	1
GCA_016787125.1	Chitinophagaceae bacterium	MBL7732173.1	arsN1	arsinothricin resistance N-acetyltransferase ArsN1 family B	plus	STRESS	METAL	ARSENIC	ARSENIC	HMM	190	186	92.47	47.67	172	AAN67541.1	arsinothricin resistance N-acetyltransferase ArsN1 family B	NF040504.1	arsinothricin resistance N-acetyltransferase ArsN1 family B	3
GCA_016786785.1	Chitinophagaceae bacterium	MBL7734686.1	arr	NAD(+)--rifampin ADP-ribosyltransferase	core	AMR	AMR	RIFAMYCIN	RIFAMYCIN	HMM	247	143	82.52	55.08	118	WP_063842202.1	NAD(+)--rifampin ADP-ribosyltransferase	NF033144.1	NAD(+)--rifampin ADP-ribosyltransferase	3
GCA_016787085.1	Chitinophagaceae bacterium	MBL7737964.1	bla	subclass B1 metallo-beta-lactamase	core	AMR	AMR	BETA-LACTAM	BETA-LACTAM	HMM	245	249	92.37	45.45	231	WP_085562386.1	subclass B1 metallo-beta-lactamase	NF033088.2	subclass B1 metallo-beta-lactamase	3
GCA_016787085.1	Chitinophagaceae bacterium	MBL7738182.1	arsN2	arsenic resistance N-acetyltransferase ArsN2	plus	STRESS	METAL	ARSENIC	ARSENIC	HMM	151	144	96.53	36.17	141	KTT96020.1	arsenic resistance N-acetyltransferase ArsN2	NF040501.1	arsenic resistance N-acetyltransferase ArsN2	1
GCA_016787135.1	Chitinophagaceae bacterium	MBL7742031.1	bla	subclass B1 metallo-beta-lactamase	core	AMR	AMR	BETA-LACTAM	BETA-LACTAM	HMM	243	249	94.78	43.22	236	WP_085562388.1	subclass B1 metallo-beta-lactamase	NF033088.2	subclass B1 metallo-beta-lactamase	1
GCA_016787135.1	Chitinophagaceae bacterium	MBL7743512.1	arsN2	arsenic resistance N-acetyltransferase ArsN2	plus	STRESS	METAL	ARSENIC	ARSENIC	HMM	156	142	96.48	37.68	138	ABB05616.1	arsenic resistance N-acetyltransferase ArsN2	NF040501.1	arsenic resistance N-acetyltransferase ArsN2	1
GCA_016786965.1	Chitinophagaceae bacterium	MBL7748501.1	arsN1	arsinothricin resistance N-acetyltransferase ArsN1 family B	plus	STRESS	METAL	ARSENIC	ARSENIC	HMM	195	186	92.47	47.09	172	AAN67541.1	arsinothricin resistance N-acetyltransferase ArsN1 family B	NF040504.1	arsinothricin resistance N-acetyltransferase ArsN1 family B	1
GCA_016787015.1	Chitinophagaceae bacterium	MBL7755581.1	bla	BlaB/IND/MUS family subclass B1 metallo-beta-lactamase	core	AMR	AMR	BETA-LACTAM	BETA-LACTAM	HMM	264	248	89.11	52.94	221	WP_012025466.1	BlaB/IND/MUS family subclass B1 metallo-beta-lactamase	NF012146.1	BlaB/IND/MUS family subclass B1 metallo-beta-lactamase	1
GCA_016787105.1	Chitinophagaceae bacterium	MBL7762453.1	bla	BlaB/IND/MUS family subclass B1 metallo-beta-lactamase	core	AMR	AMR	BETA-LACTAM	BETA-LACTAM	HMM	245	248	95.56	51.9	237	WP_012025466.1	BlaB/IND/MUS family subclass B1 metallo-beta-lactamase	NF012146.1	BlaB/IND/MUS family subclass B1 metallo-beta-lactamase	1
GCA_016786845.1	Chitinophagaceae bacterium	MBL7767092.1	arr	NAD(+)--rifampin ADP-ribosyltransferase	core	AMR	AMR	RIFAMYCIN	RIFAMYCIN	HMM	146	137	97.08	57.89	133	WP_012695486.1	NAD(+)--rifampin ADP-ribosyltransferase	NF033144.1	NAD(+)--rifampin ADP-ribosyltransferase	1
GCA_016787265.1	Flavipsychrobacter sp.	MBL7767578.1	aph(3')	APH(3') family aminoglycoside O-phosphotransferase	core	AMR	AMR	AMINOGLYCOSIDE	AMINOGLYCOSIDE	HMM	251	271	91.14	34.52	252	WP_000018321.1	APH(3') family aminoglycoside O-phosphotransferase	NF033068.1	APH(3') family aminoglycoside O-phosphotransferase	3
GCA_016787265.1	Flavipsychrobacter sp.	MBL7768267.1	arr	NAD(+)--rifampin ADP-ribosyltransferase	core	AMR	AMR	RIFAMYCIN	RIFAMYCIN	HMM	142	137	96.35	59.85	132	WP_012695486.1	NAD(+)--rifampin ADP-ribosyltransferase	NF033144.1	NAD(+)--rifampin ADP-ribosyltransferase	3
GCA_016787265.1	Flavipsychrobacter sp.	MBL7768307.1	lnu(H)	lincosamide nucleotidyltransferase Lnu(H)	core	AMR	AMR	LINCOSAMIDE	LINCOSAMIDE	BLASTP	260	260	100	99.62	260	WP_051021433.1	lincosamide nucleotidyltransferase Lnu(H)	NF040958.1	lincosamide nucleotidyltransferase Lnu(H)	3
GCA_016787265.1	Flavipsychrobacter sp.	MBL7770349.1	bla	subclass B1 metallo-beta-lactamase	core	AMR	AMR	BETA-LACTAM	BETA-LACTAM	HMM	392	247	95.95	46.84	237	WP_013992183.1	subclass B1 metallo-beta-lactamase	NF033088.2	subclass B1 metallo-beta-lactamase	1
GCA_016787065.1	Chitinophagaceae bacterium	MBL7772861.1	bla	subclass B1 metallo-beta-lactamase	core	AMR	AMR	BETA-LACTAM	BETA-LACTAM	HMM	227	253	88.54	63.39	224	WP_119059468.1	subclass B1 metallo-beta-lactamase	NF033088.2	subclass B1 metallo-beta-lactamase	3
GCA_017305105.1	Sediminibacterium magnilacihabitans	MBN8718053.1	bla	metallo-beta-lactamase	core	AMR	AMR	BETA-LACTAM	BETA-LACTAM	HMM	161	289	44.98	65.38	130	WP_041884311.1	metallo-beta-lactamase	NF012229.1	metallo-beta-lactamase	3
GCA_017305105.1	Sediminibacterium magnilacihabitans	MBN8718450.1	merA	mercury(II) reductase	plus	STRESS	METAL	MERCURY	MERCURY	HMM	571	568	97.36	70.34	553	ADP02162.1	mercury(II) reductase	TIGR02053.1	mercury(II) reductase	3
GCA_017304335.1	Terrimonas ferruginea	MBN8783656.1	bla	subclass B3 metallo-beta-lactamase	core	AMR	AMR	BETA-LACTAM	BETA-LACTAM	HMM	288	293	94.54	62.09	277	WP_063842707.1	subclass B3 metallo-beta-lactamase	NF033105.1	subclass B3 metallo-beta-lactamase	1
GCA_017304255.1	Terrimonas sp.	MBN8786721.1	arr	NAD(+)--rifampin ADP-ribosyltransferase	core	AMR	AMR	RIFAMYCIN	RIFAMYCIN	HMM	247	150	83.33	50.4	125	WP_000237816.1	NAD(+)--rifampin ADP-ribosyltransferase	NF033144.1	NAD(+)--rifampin ADP-ribosyltransferase	1
GCA_017304255.1	Terrimonas sp.	MBN8788339.1	blaOXA	class D beta-lactamase	core	AMR	AMR	BETA-LACTAM	BETA-LACTAM	HMM	270	268	98.51	37.23	274	WP_003328240.1	class D beta-lactamase	NF012161.0	class D beta-lactamase	6
GCA_017304255.1	Terrimonas sp.	MBN8789822.1	bla	subclass B3 metallo-beta-lactamase	core	AMR	AMR	BETA-LACTAM	BETA-LACTAM	HMM	289	290	97.24	62.77	282	WP_034866180.1	subclass B3 metallo-beta-lactamase	NF033105.1	subclass B3 metallo-beta-lactamase	6
GCA_017306865.1	Filimonas sp.	MBN9295762.1	bla	class A beta-lactamase, subclass A2	core	AMR	AMR	BETA-LACTAM	BETA-LACTAM	HMM	294	301	89.7	51.85	270	WP_032494759.1	class A beta-lactamase, subclass A2	NF012099.1	class A beta-lactamase, subclass A2	6
GCA_017306865.1	Filimonas sp.	MBN9296335.1	bla	subclass B3 metallo-beta-lactamase	core	AMR	AMR	BETA-LACTAM	BETA-LACTAM	HMM	295	300	93.67	58.01	281	WP_063842717.1	subclass B3 metallo-beta-lactamase	NF033105.1	subclass B3 metallo-beta-lactamase	6
GCA_017307735.1	Chitinophagaceae bacterium	MBN9349316.1	merA	mercury(II) reductase	plus	STRESS	METAL	MERCURY	MERCURY	HMM	476	568	83.45	53.68	475	ADP02162.1	mercury(II) reductase	TIGR02053.1	mercury(II) reductase	6
GCA_017307735.1	Chitinophagaceae bacterium	MBN9352140.1	merA	mercury(II) reductase	plus	STRESS	METAL	MERCURY	MERCURY	HMM	476	568	83.45	53.16	474	ADP02162.1	mercury(II) reductase	TIGR02053.1	mercury(II) reductase	6
GCA_017307755.1	Chitinophagaceae bacterium	MBN9379127.1	bla	subclass B3 metallo-beta-lactamase	core	AMR	AMR	BETA-LACTAM	BETA-LACTAM	HMM	298	289	97.23	58.36	281	WP_041884311.1	subclass B3 metallo-beta-lactamase	NF033105.1	subclass B3 metallo-beta-lactamase	6
GCA_017307755.1	Chitinophagaceae bacterium	MBN9379917.1	bla	class A beta-lactamase, subclass A2	core	AMR	AMR	BETA-LACTAM	BETA-LACTAM	HMM	321	303	91.42	46.93	277	WP_041881964.1	class A beta-lactamase, subclass A2	NF012099.1	class A beta-lactamase, subclass A2	6
GCA_017742215.1	Chitinophaga chungangae	MBO9152493.1	bla	class A beta-lactamase, subclass A2	core	AMR	AMR	BETA-LACTAM	BETA-LACTAM	HMM	311	319	98.75	44.62	316	WP_063842272.1	class A beta-lactamase, subclass A2	NF012099.1	class A beta-lactamase, subclass A2	6
GCA_017742215.1	Chitinophaga chungangae	MBO9152729.1	blaOXA	class D beta-lactamase	core	AMR	AMR	BETA-LACTAM	BETA-LACTAM	HMM	268	258	97.29	40.38	260	WP_004919358.1	class D beta-lactamase	NF012161.0	class D beta-lactamase	6
GCA_017742245.1	Niastella soli	MBO9204398.1	bla	subclass B3 metallo-beta-lactamase	core	AMR	AMR	BETA-LACTAM	BETA-LACTAM	HMM	288	289	94.46	63.74	273	WP_041884311.1	subclass B3 metallo-beta-lactamase	NF033105.1	subclass B3 metallo-beta-lactamase	6
GCA_017742245.1	Niastella soli	MBO9204933.1	arsN2	arsenic resistance N-acetyltransferase ArsN2	plus	STRESS	METAL	ARSENIC	ARSENIC	HMM	142	147	90.48	33.83	133	ABG05788.1	arsenic resistance N-acetyltransferase ArsN2	NF040501.1	arsenic resistance N-acetyltransferase ArsN2	6
GCA_017744515.1	Niastella sp.	MBO9562991.1	bla	BlaB/IND/MUS family subclass B1 metallo-beta-lactamase	core	AMR	AMR	BETA-LACTAM	BETA-LACTAM	HMM	244	246	96.34	54.01	237	WP_318245543.1	BlaB/IND/MUS family subclass B1 metallo-beta-lactamase	NF012146.1	BlaB/IND/MUS family subclass B1 metallo-beta-lactamase	6
GCA_017744575.1	Chitinophagaceae bacterium	MBO9573251.1	arr	NAD(+)--rifampin ADP-ribosyltransferase	core	AMR	AMR	RIFAMYCIN	RIFAMYCIN	HMM	247	150	83.33	52	125	WP_052238312.1	NAD(+)--rifampin ADP-ribosyltransferase	NF033144.1	NAD(+)--rifampin ADP-ribosyltransferase	6
GCA_017744715.1	Niabella sp.	MBO9594601.1	bla	subclass B3 metallo-beta-lactamase	core	AMR	AMR	BETA-LACTAM	BETA-LACTAM	HMM	296	300	93.67	60.14	281	WP_063842717.1	subclass B3 metallo-beta-lactamase	NF033105.1	subclass B3 metallo-beta-lactamase	6
GCA_017744715.1	Niabella sp.	MBO9595401.1	arr	NAD(+)--rifampin ADP-ribosyltransferase	core	AMR	AMR	RIFAMYCIN	RIFAMYCIN	HMM	247	150	83.33	52	125	WP_000237816.1	NAD(+)--rifampin ADP-ribosyltransferase	NF033144.1	NAD(+)--rifampin ADP-ribosyltransferase	6
GCA_017744795.1	Niabella sp.	MBO9620354.1	bla	subclass B3 metallo-beta-lactamase	core	AMR	AMR	BETA-LACTAM	BETA-LACTAM	HMM	301	290	97.93	59.58	287	WP_078724262.1	subclass B3 metallo-beta-lactamase	NF033105.1	subclass B3 metallo-beta-lactamase	6
GCA_017744795.1	Niabella sp.	MBO9620915.1	arr	NAD(+)--rifampin ADP-ribosyltransferase	core	AMR	AMR	RIFAMYCIN	RIFAMYCIN	HMM	132	150	82.67	52.42	124	WP_052238312.1	NAD(+)--rifampin ADP-ribosyltransferase	NF033144.1	NAD(+)--rifampin ADP-ribosyltransferase	6
GCA_017744805.1	Chitinophagaceae bacterium	MBO9635591.1	bla	subclass B3 metallo-beta-lactamase	core	AMR	AMR	BETA-LACTAM	BETA-LACTAM	HMM	301	293	95.22	59.5	279	WP_063842707.1	subclass B3 metallo-beta-lactamase	NF033105.1	subclass B3 metallo-beta-lactamase	1
GCA_017745025.1	Chitinophagaceae bacterium	MBO9659650.1	bla	subclass B3 metallo-beta-lactamase	core	AMR	AMR	BETA-LACTAM	BETA-LACTAM	HMM	290	293	91.81	58.3	271	WP_063842707.1	subclass B3 metallo-beta-lactamase	NF033105.1	subclass B3 metallo-beta-lactamase	2
GCA_017745025.1	Chitinophagaceae bacterium	MBO9660089.1	arr	NAD(+)--rifampin ADP-ribosyltransferase	core	AMR	AMR	RIFAMYCIN	RIFAMYCIN	HMM	149	137	94.89	59.54	131	WP_012695486.1	NAD(+)--rifampin ADP-ribosyltransferase	NF033144.1	NAD(+)--rifampin ADP-ribosyltransferase	2
GCA_017745135.1	Flavisolibacter sp.	MBO9681230.1	arr	NAD(+)--rifampin ADP-ribosyltransferase	core	AMR	AMR	RIFAMYCIN	RIFAMYCIN	HMM	247	143	82.52	55.93	118	WP_063842202.1	NAD(+)--rifampin ADP-ribosyltransferase	NF033144.1	NAD(+)--rifampin ADP-ribosyltransferase	4
GCA_017745135.1	Flavisolibacter sp.	MBO9681788.1	arsN2	arsenic resistance N-acetyltransferase ArsN2	plus	STRESS	METAL	ARSENIC	ARSENIC	HMM	142	147	92.52	33.82	136	ABG05788.1	arsenic resistance N-acetyltransferase ArsN2	NF040501.1	arsenic resistance N-acetyltransferase ArsN2	4
GCA_017745135.1	Flavisolibacter sp.	MBO9683620.1	blaOXA	class D beta-lactamase	core	AMR	AMR	BETA-LACTAM	BETA-LACTAM	HMM	269	258	94.57	41.34	254	WP_004919358.1	class D beta-lactamase	NF012161.0	class D beta-lactamase	4
GCA_017745135.1	Flavisolibacter sp.	MBO9683702.1	arsN1	arsinothricin resistance N-acetyltransferase ArsN1 family B	plus	STRESS	METAL	ARSENIC	ARSENIC	HMM	200	186	93.55	44.25	174	AAN67541.1	arsinothricin resistance N-acetyltransferase ArsN1 family B	NF040504.1	arsinothricin resistance N-acetyltransferase ArsN1 family B	4
GCA_017745275.1	Chitinophaga sp.	MBO9728374.1	bla	class A beta-lactamase	core	AMR	AMR	BETA-LACTAM	BETA-LACTAM	HMM	301	303	91.42	50.18	279	WP_041881964.1	class A beta-lactamase	NF033103.1	class A beta-lactamase	3
GCA_017745275.1	Chitinophaga sp.	MBO9729750.1	aadS	AadS family aminoglycoside 6-adenylyltransferase	core	AMR	AMR	AMINOGLYCOSIDE	STREPTOMYCIN	HMM	286	287	97.91	59.79	281	WP_003013318.1	AadS family aminoglycoside 6-adenylyltransferase	NF033387.1	AadS family aminoglycoside 6-adenylyltransferase	3
GCA_017745275.1	Chitinophaga sp.	MBO9731536.1	bla	subclass B1 metallo-beta-lactamase	core	AMR	AMR	BETA-LACTAM	BETA-LACTAM	HMM	239	237	97.05	41.13	231	WP_063864592.1	subclass B1 metallo-beta-lactamase	NF033088.2	subclass B1 metallo-beta-lactamase	3
GCA_017745275.1	Chitinophaga sp.	MBO9731894.1	blaOXA	class D beta-lactamase	core	AMR	AMR	BETA-LACTAM	BETA-LACTAM	HMM	265	289	83.04	41.32	242	WP_075071939.1	class D beta-lactamase	NF012161.0	class D beta-lactamase	2
GCA_017983845.1	Sediminibacterium sp.	MBP6000115.1	bla	subclass B1 metallo-beta-lactamase	core	AMR	AMR	BETA-LACTAM	BETA-LACTAM	HMM	251	253	98.81	62.4	250	WP_119059468.1	subclass B1 metallo-beta-lactamase	NF033088.2	subclass B1 metallo-beta-lactamase	2
GCA_017983695.1	Ferruginibacter sp.	MBP6022806.1	blaOXA	class D beta-lactamase	core	AMR	AMR	BETA-LACTAM	BETA-LACTAM	HMM	274	258	93.8	41.04	251	WP_004919358.1	class D beta-lactamase	NF012161.0	class D beta-lactamase	2
GCA_017983695.1	Ferruginibacter sp.	MBP6023310.1	bla	subclass B3 metallo-beta-lactamase	core	AMR	AMR	BETA-LACTAM	BETA-LACTAM	HMM	291	300	93.67	65.12	281	WP_063842717.1	subclass B3 metallo-beta-lactamase	NF033105.1	subclass B3 metallo-beta-lactamase	2
GCA_017984145.1	Ferruginibacter sp.	MBP6046065.1	bla	BlaB/IND/MUS family subclass B1 metallo-beta-lactamase	core	AMR	AMR	BETA-LACTAM	BETA-LACTAM	HMM	247	241	97.93	51.9	237	WP_148044405.1	BlaB/IND/MUS family subclass B1 metallo-beta-lactamase	NF012146.1	BlaB/IND/MUS family subclass B1 metallo-beta-lactamase	2
GCA_017985305.1	Sediminibacterium sp.	MBP6144850.1	bla	subclass B1 metallo-beta-lactamase	core	AMR	AMR	BETA-LACTAM	BETA-LACTAM	HMM	251	253	98.81	62.4	250	WP_119059468.1	subclass B1 metallo-beta-lactamase	NF033088.2	subclass B1 metallo-beta-lactamase	2
GCA_017986025.1	Chitinophagaceae bacterium	MBP6215120.1	arsN1	arsinothricin resistance N-acetyltransferase ArsN1 family B	plus	STRESS	METAL	ARSENIC	ARSENIC	HMM	195	186	92.47	44.77	172	AAN67541.1	arsinothricin resistance N-acetyltransferase ArsN1 family B	NF040504.1	arsinothricin resistance N-acetyltransferase ArsN1 family B	3
GCA_017986175.1	Chitinophagaceae bacterium	MBP6233885.1	bla	BlaB/IND/MUS family subclass B1 metallo-beta-lactamase	core	AMR	AMR	BETA-LACTAM	BETA-LACTAM	HMM	245	241	97.93	53.33	240	WP_148044405.1	BlaB/IND/MUS family subclass B1 metallo-beta-lactamase	NF012146.1	BlaB/IND/MUS family subclass B1 metallo-beta-lactamase	3
GCA_017986745.1	Ferruginibacter sp.	MBP6285281.1	arsN2	arsenic resistance N-acetyltransferase ArsN2	plus	STRESS	METAL	ARSENIC	ARSENIC	HMM	148	144	98.61	34.51	142	KTT96020.1	arsenic resistance N-acetyltransferase ArsN2	NF040501.1	arsenic resistance N-acetyltransferase ArsN2	3
GCA_017988335.1	Ferruginibacter sp.	MBP6430437.1	blaOXA	class D beta-lactamase	core	AMR	AMR	BETA-LACTAM	BETA-LACTAM	HMM	283	258	94.96	40.94	254	WP_004919358.1	class D beta-lactamase	NF012161.0	class D beta-lactamase	3
GCA_017988695.1	Chitinophagaceae bacterium	MBP6476720.1	arr	NAD(+)--rifampin ADP-ribosyltransferase	core	AMR	AMR	RIFAMYCIN	RIFAMYCIN	HMM	149	137	93.43	55.47	128	WP_012695486.1	NAD(+)--rifampin ADP-ribosyltransferase	NF033144.1	NAD(+)--rifampin ADP-ribosyltransferase	3
GCA_017988695.1	Chitinophagaceae bacterium	MBP6477989.1	bla	subclass B1 metallo-beta-lactamase	core	AMR	AMR	BETA-LACTAM	BETA-LACTAM	HMM	252	252	100	71.03	252	WP_202272142.1	subclass B1 metallo-beta-lactamase	NF033088.2	subclass B1 metallo-beta-lactamase	3
GCA_017990385.1	Lacibacter sp.	MBP6687342.1	bla	BlaB/IND/MUS family subclass B1 metallo-beta-lactamase	core	AMR	AMR	BETA-LACTAM	BETA-LACTAM	HMM	241	241	99.59	54.17	240	WP_148044405.1	BlaB/IND/MUS family subclass B1 metallo-beta-lactamase	NF012146.1	BlaB/IND/MUS family subclass B1 metallo-beta-lactamase	1
GCA_017993295.1	Ferruginibacter sp.	MBP6987059.1	bla	BlaB/IND/MUS family subclass B1 metallo-beta-lactamase	core	AMR	AMR	BETA-LACTAM	BETA-LACTAM	HMM	247	241	97.93	51.9	237	WP_148044405.1	BlaB/IND/MUS family subclass B1 metallo-beta-lactamase	NF012146.1	BlaB/IND/MUS family subclass B1 metallo-beta-lactamase	1
GCA_017994395.1	Chitinophagaceae bacterium	MBP7109053.1	arsN1	arsinothricin resistance N-acetyltransferase ArsN1 family B	plus	STRESS	METAL	ARSENIC	ARSENIC	HMM	197	186	93.55	45.98	174	AAN67541.1	arsinothricin resistance N-acetyltransferase ArsN1 family B	NF040504.1	arsinothricin resistance N-acetyltransferase ArsN1 family B	1
GCA_017994395.1	Chitinophagaceae bacterium	MBP7109287.1	bla	subclass B1 metallo-beta-lactamase	core	AMR	AMR	BETA-LACTAM	BETA-LACTAM	HMM	252	252	100	71.03	252	WP_202272142.1	subclass B1 metallo-beta-lactamase	NF033088.2	subclass B1 metallo-beta-lactamase	2
GCA_017996605.1	Chitinophagaceae bacterium	MBP7314205.1	bla	subclass B1 metallo-beta-lactamase	core	AMR	AMR	BETA-LACTAM	BETA-LACTAM	HMM	252	252	100	71.03	252	WP_202272142.1	subclass B1 metallo-beta-lactamase	NF033088.2	subclass B1 metallo-beta-lactamase	2
GCA_017996605.1	Chitinophagaceae bacterium	MBP7315787.1	arsD	arsenite efflux transporter metallochaperone ArsD	plus	STRESS	METAL	ARSENIC	ARSENITE	HMM	108	107	97.2	44.23	104	KAA9473340.1	arsenite efflux transporter metallochaperone ArsD	NF033727.2	arsenite efflux transporter metallochaperone ArsD	2
GCA_017996605.1	Chitinophagaceae bacterium	MBP7316071.1	arsN1	arsinothricin resistance N-acetyltransferase ArsN1 family B	plus	STRESS	METAL	ARSENIC	ARSENIC	HMM	207	186	94.62	46.02	176	AAN67541.1	arsinothricin resistance N-acetyltransferase ArsN1 family B	NF040504.1	arsinothricin resistance N-acetyltransferase ArsN1 family B	2
GCA_017998385.1	Chitinophagaceae bacterium	MBP7558467.1	arr	NAD(+)--rifampin ADP-ribosyltransferase	core	AMR	AMR	RIFAMYCIN	RIFAMYCIN	HMM	145	143	95.1	55.15	136	WP_063842202.1	NAD(+)--rifampin ADP-ribosyltransferase	NF033144.1	NAD(+)--rifampin ADP-ribosyltransferase	1
GCA_017998385.1	Chitinophagaceae bacterium	MBP7558513.1	bla	subclass B3 metallo-beta-lactamase	core	AMR	AMR	BETA-LACTAM	BETA-LACTAM	HMM	273	293	90.78	65.67	268	WP_063842707.1	subclass B3 metallo-beta-lactamase	NF033105.1	subclass B3 metallo-beta-lactamase	1
GCA_017999715.1	Ferruginibacter sp.	MBP7718474.1	bla	BlaB/IND/MUS family subclass B1 metallo-beta-lactamase	core	AMR	AMR	BETA-LACTAM	BETA-LACTAM	HMM	247	241	97.93	51.9	237	WP_148044405.1	BlaB/IND/MUS family subclass B1 metallo-beta-lactamase	NF012146.1	BlaB/IND/MUS family subclass B1 metallo-beta-lactamase	1
GCA_018003245.1	Sediminibacterium sp.	MBP7939905.1	mph(E)	Mph(E) family macrolide 2'-phosphotransferase	core	AMR	AMR	MACROLIDE	ERYTHROMYCIN	EXACTP	294	294	100	100	294	WP_000155092.1	Mph(E) family macrolide 2'-phosphotransferase	NF012158.1	Mph(E) family macrolide 2'-phosphotransferase	1
GCA_018003245.1	Sediminibacterium sp.	MBP7939906.1	msr(E)	ABC-F type ribosomal protection protein Msr(E)	core	AMR	AMR	MACROLIDE/STREPTOGRAMIN	AZITHROMYCIN/ERYTHROMYCIN/STREPTOGRAMIN	EXACTP	491	491	100	100	491	WP_000052512.1	ABC-F type ribosomal protection protein Msr(E)	NF000168.2	Msr family ABC-F type ribosomal protection protein	3
GCA_018003245.1	Sediminibacterium sp.	MBP7940111.1	bla	subclass B1 metallo-beta-lactamase	core	AMR	AMR	BETA-LACTAM	BETA-LACTAM	HMM	253	253	98.81	61.6	250	WP_119059468.1	subclass B1 metallo-beta-lactamase	NF033088.2	subclass B1 metallo-beta-lactamase	3
GCA_018005575.1	Chitinophagaceae bacterium	MBP8115154.1	bla	BlaB/IND/MUS family subclass B1 metallo-beta-lactamase	core	AMR	AMR	BETA-LACTAM	BETA-LACTAM	HMM	245	241	97.51	55.65	239	WP_148044405.1	BlaB/IND/MUS family subclass B1 metallo-beta-lactamase	NF012146.1	BlaB/IND/MUS family subclass B1 metallo-beta-lactamase	3
GCA_018005575.1	Chitinophagaceae bacterium	MBP8115762.1	arsN1	arsinothricin resistance N-acetyltransferase ArsN1 family B	plus	STRESS	METAL	ARSENIC	ARSENIC	HMM	197	186	92.47	45.35	172	AAN67541.1	arsinothricin resistance N-acetyltransferase ArsN1 family B	NF040504.1	arsinothricin resistance N-acetyltransferase ArsN1 family B	2
GCA_018052585.1	Ferruginibacter sp.	MBP8611538.1	bla	BlaB/IND/MUS family subclass B1 metallo-beta-lactamase	core	AMR	AMR	BETA-LACTAM	BETA-LACTAM	HMM	247	241	97.93	51.9	237	WP_148044405.1	BlaB/IND/MUS family subclass B1 metallo-beta-lactamase	NF012146.1	BlaB/IND/MUS family subclass B1 metallo-beta-lactamase	2
GCA_018054545.1	Ferruginibacter sp.	MBP8764808.1	bla	BlaB/IND/MUS family subclass B1 metallo-beta-lactamase	core	AMR	AMR	BETA-LACTAM	BETA-LACTAM	HMM	247	241	97.93	51.9	237	WP_148044405.1	BlaB/IND/MUS family subclass B1 metallo-beta-lactamase	NF012146.1	BlaB/IND/MUS family subclass B1 metallo-beta-lactamase	2
GCA_018057635.1	Ferruginibacter sp.	MBP9097257.1	bla	BlaB/IND/MUS family subclass B1 metallo-beta-lactamase	core	AMR	AMR	BETA-LACTAM	BETA-LACTAM	HMM	245	241	97.51	56.07	239	WP_148044405.1	BlaB/IND/MUS family subclass B1 metallo-beta-lactamase	NF012146.1	BlaB/IND/MUS family subclass B1 metallo-beta-lactamase	2
GCA_018057635.1	Ferruginibacter sp.	MBP9099410.1	blaOXA	class D beta-lactamase	core	AMR	AMR	BETA-LACTAM	BETA-LACTAM	HMM	272	269	96.28	39.77	264	WP_014932145.1	class D beta-lactamase	NF012161.0	class D beta-lactamase	2
GCA_018057565.1	Chitinophagaceae bacterium	MBP9104544.1	arsN1	arsinothricin resistance N-acetyltransferase ArsN1 family B	plus	STRESS	METAL	ARSENIC	ARSENIC	HMM	197	186	92.47	46.51	172	AAN67541.1	arsinothricin resistance N-acetyltransferase ArsN1 family B	NF040504.1	arsinothricin resistance N-acetyltransferase ArsN1 family B	2
GCA_018058275.1	Chitinophagaceae bacterium	MBP9214416.1	bla	BlaB/IND/MUS family subclass B1 metallo-beta-lactamase	core	AMR	AMR	BETA-LACTAM	BETA-LACTAM	HMM	239	248	95.97	55.88	238	WP_012025466.1	BlaB/IND/MUS family subclass B1 metallo-beta-lactamase	NF012146.1	BlaB/IND/MUS family subclass B1 metallo-beta-lactamase	3
GCA_018059905.1	Ferruginibacter sp.	MBP9606006.1	bla	BlaB/IND/MUS family subclass B1 metallo-beta-lactamase	core	AMR	AMR	BETA-LACTAM	BETA-LACTAM	HMM	247	241	97.93	51.9	237	WP_148044405.1	BlaB/IND/MUS family subclass B1 metallo-beta-lactamase	NF012146.1	BlaB/IND/MUS family subclass B1 metallo-beta-lactamase	3
GCA_018061385.1	Chitinophagaceae bacterium	MBP9741019.1	bla	BlaB/IND/MUS family subclass B1 metallo-beta-lactamase	core	AMR	AMR	BETA-LACTAM	BETA-LACTAM	HMM	239	248	95.97	55.88	238	WP_012025466.1	BlaB/IND/MUS family subclass B1 metallo-beta-lactamase	NF012146.1	BlaB/IND/MUS family subclass B1 metallo-beta-lactamase	3
GCA_017537025.1	Sediminibacterium sp.	MBR2649226.1	bla	BlaB/IND/MUS family subclass B1 metallo-beta-lactamase	core	AMR	AMR	BETA-LACTAM	BETA-LACTAM	HMM	234	237	98.73	49.57	234	WP_063864592.1	BlaB/IND/MUS family subclass B1 metallo-beta-lactamase	NF012146.1	BlaB/IND/MUS family subclass B1 metallo-beta-lactamase	1
GCA_018224885.1	Chitinophaga hostae	MBS0027140.1	bla	class A beta-lactamase	core	AMR	AMR	BETA-LACTAM	BETA-LACTAM	HMM	294	319	84.95	48.54	274	WP_063842272.1	class A beta-lactamase	NF033103.1	class A beta-lactamase	3
GCA_018224885.1	Chitinophaga hostae	MBS0028378.1	blaOXA	class D beta-lactamase	core	AMR	AMR	BETA-LACTAM	BETA-LACTAM	HMM	269	258	98.06	38.17	262	WP_004919358.1	class D beta-lactamase	NF012161.0	class D beta-lactamase	3
GCA_018224885.1	Chitinophaga hostae	MBS0030468.1	bla	subclass B1 metallo-beta-lactamase	core	AMR	AMR	BETA-LACTAM	BETA-LACTAM	HMM	238	241	95.44	42.55	235	WP_148044405.1	subclass B1 metallo-beta-lactamase	NF033088.2	subclass B1 metallo-beta-lactamase	3
GCA_018224885.1	Chitinophaga hostae	MBS0030673.1	bla	subclass B3 metallo-beta-lactamase	core	AMR	AMR	BETA-LACTAM	BETA-LACTAM	HMM	290	289	92.73	58.58	268	WP_041884311.1	subclass B3 metallo-beta-lactamase	NF033105.1	subclass B3 metallo-beta-lactamase	1
GCA_018335935.1	Chitinophagaceae bacterium	MBS4042343.1	blaOXA	class D beta-lactamase	core	AMR	AMR	BETA-LACTAM	BETA-LACTAM	HMM	275	258	95.35	40.39	255	WP_004919358.1	class D beta-lactamase	NF012161.0	class D beta-lactamase	1
GCA_018336115.1	Chitinophagaceae bacterium	MBS4064029.1	bla	subclass B1 metallo-beta-lactamase	core	AMR	AMR	BETA-LACTAM	BETA-LACTAM	HMM	252	253	98.81	66	250	WP_119059468.1	subclass B1 metallo-beta-lactamase	NF033088.2	subclass B1 metallo-beta-lactamase	1
GCA_018336115.1	Chitinophagaceae bacterium	MBS4064088.1	blaOXA	class D beta-lactamase	core	AMR	AMR	BETA-LACTAM	BETA-LACTAM	HMM	268	265	95.85	38.76	258	WP_011071128.1	class D beta-lactamase	NF012161.0	class D beta-lactamase	1
GCA_018336115.1	Chitinophagaceae bacterium	MBS4065058.1	aac(6')	aminoglycoside 6'-N-acetyltransferase	core	AMR	AMR	AMINOGLYCOSIDE	AMINOGLYCOSIDE	HMM	151	182	78.02	42.96	142	WP_024566461.1	aminoglycoside 6'-N-acetyltransferase	NF043067.1	aminoglycoside 6'-N-acetyltransferase	2
GCA_018780685.1	Sediminibacterium sp.	MBT9484376.1	bla	BlaB/IND/MUS family subclass B1 metallo-beta-lactamase	core	AMR	AMR	BETA-LACTAM	BETA-LACTAM	HMM	344	246	96.34	51.68	238	WP_318245543.1	BlaB/IND/MUS family subclass B1 metallo-beta-lactamase	NF012146.1	BlaB/IND/MUS family subclass B1 metallo-beta-lactamase	2
GCA_018882525.1	Sediminibacterium sp.	MBU3744858.1	bla	subclass B1 metallo-beta-lactamase	core	AMR	AMR	BETA-LACTAM	BETA-LACTAM	HMM	238	246	94.31	45.11	235	WP_318245543.1	subclass B1 metallo-beta-lactamase	NF033088.2	subclass B1 metallo-beta-lactamase	1
GCA_018993145.1	Flavihumibacter sp.	MBU7576974.1	arsN2	arsenic resistance N-acetyltransferase ArsN2	plus	STRESS	METAL	ARSENIC	ARSENIC	HMM	148	147	92.52	36.03	136	ABG05788.1	arsenic resistance N-acetyltransferase ArsN2	NF040501.1	arsenic resistance N-acetyltransferase ArsN2	1
GCA_018993145.1	Flavihumibacter sp.	MBU7578241.1	arr	NAD(+)--rifampin ADP-ribosyltransferase	core	AMR	AMR	RIFAMYCIN	RIFAMYCIN	HMM	104	137	66.42	65.93	91	WP_012695486.1	NAD(+)--rifampin ADP-ribosyltransferase	NF033144.1	NAD(+)--rifampin ADP-ribosyltransferase	1
GCA_018993145.1	Flavihumibacter sp.	MBU7578529.1	bla	subclass B1 metallo-beta-lactamase	core	AMR	AMR	BETA-LACTAM	BETA-LACTAM	HMM	356	247	89.47	50.23	221	WP_013992183.1	subclass B1 metallo-beta-lactamase	NF033088.2	subclass B1 metallo-beta-lactamase	2
GCA_019052635.1	Ferruginibacter sp.	MBU9935519.1	arsN2	arsenic resistance N-acetyltransferase ArsN2	plus	STRESS	METAL	ARSENIC	ARSENIC	HMM	148	144	98.61	34.51	142	KTT96020.1	arsenic resistance N-acetyltransferase ArsN2	NF040501.1	arsenic resistance N-acetyltransferase ArsN2	2
GCA_019130065.1	Pinibacter aurantiacus	MBV4357513.1	arr	NAD(+)--rifampin ADP-ribosyltransferase	core	AMR	AMR	RIFAMYCIN	RIFAMYCIN	HMM	146	143	97.2	52.52	139	WP_063842202.1	NAD(+)--rifampin ADP-ribosyltransferase	NF033144.1	NAD(+)--rifampin ADP-ribosyltransferase	3
GCA_019130065.1	Pinibacter aurantiacus	MBV4360232.1	bla	BlaB/IND/MUS family subclass B1 metallo-beta-lactamase	core	AMR	AMR	BETA-LACTAM	BETA-LACTAM	HMM	246	237	96.2	52.17	230	WP_063864592.1	BlaB/IND/MUS family subclass B1 metallo-beta-lactamase	NF012146.1	BlaB/IND/MUS family subclass B1 metallo-beta-lactamase	3
GCA_019219075.1	Chitinophaga sp. sic0106	MBV7528855.1	blaOXA	class D beta-lactamase	core	AMR	AMR	BETA-LACTAM	BETA-LACTAM	HMM	268	258	98.06	39.85	261	WP_004919358.1	class D beta-lactamase	NF012161.0	class D beta-lactamase	3
GCA_019219075.1	Chitinophaga sp. sic0106	MBV7529868.1	aadS	AadS family aminoglycoside 6-adenylyltransferase	core	AMR	AMR	AMINOGLYCOSIDE	STREPTOMYCIN	HMM	290	287	99.65	54.9	286	WP_003013318.1	AadS family aminoglycoside 6-adenylyltransferase	NF033387.1	AadS family aminoglycoside 6-adenylyltransferase	3
GCA_019219075.1	Chitinophaga sp. sic0106	MBV7532996.1	bla	subclass B3 metallo-beta-lactamase	core	AMR	AMR	BETA-LACTAM	BETA-LACTAM	HMM	288	293	96.25	59.57	282	WP_063842707.1	subclass B3 metallo-beta-lactamase	NF033105.1	subclass B3 metallo-beta-lactamase	3
GCA_019236475.1	Chitinophaga sp.	MBV8252395.1	bla	class A beta-lactamase	core	AMR	AMR	BETA-LACTAM	BETA-LACTAM	HMM	291	295	90.17	61.19	268	WP_064964747.1	class A beta-lactamase	NF033103.1	class A beta-lactamase	3
GCA_019236475.1	Chitinophaga sp.	MBV8253961.1	bla	class A beta-lactamase, subclass A2	core	AMR	AMR	BETA-LACTAM	BETA-LACTAM	HMM	306	303	97.69	46.98	298	WP_041881964.1	class A beta-lactamase, subclass A2	NF012099.1	class A beta-lactamase, subclass A2	2
GCA_019236475.1	Chitinophaga sp.	MBV8254092.1	bla	subclass B3 metallo-beta-lactamase	core	AMR	AMR	BETA-LACTAM	BETA-LACTAM	HMM	295	289	99.65	62.76	290	WP_041884311.1	subclass B3 metallo-beta-lactamase	NF033105.1	subclass B3 metallo-beta-lactamase	2
GCA_019236475.1	Chitinophaga sp.	MBV8254505.1	blaOXA	class D beta-lactamase	core	AMR	AMR	BETA-LACTAM	BETA-LACTAM	HMM	267	258	96.9	40.93	259	WP_004919358.1	class D beta-lactamase	NF012161.0	class D beta-lactamase	1
GCA_019247895.1	Parafilimonas sp.	MBV9961780.1	arr	NAD(+)--rifampin ADP-ribosyltransferase	core	AMR	AMR	RIFAMYCIN	RIFAMYCIN	HMM	148	137	94.16	57.36	129	WP_012695486.1	NAD(+)--rifampin ADP-ribosyltransferase	NF033144.1	NAD(+)--rifampin ADP-ribosyltransferase	2
GCA_019247775.1	Chitinophagaceae bacterium	MBV9986230.1	blaOXA	class D beta-lactamase	core	AMR	AMR	BETA-LACTAM	BETA-LACTAM	HMM	282	281	97.51	37.76	286	WP_256875622.1	class D beta-lactamase	NF012161.0	class D beta-lactamase	2
GCA_019264645.1	Sediminibacterium sp.	MBW0162050.1	aac(6')	aminoglycoside 6'-N-acetyltransferase	core	AMR	AMR	AMINOGLYCOSIDE	AMINOGLYCOSIDE	HMM	151	182	78.02	43.66	142	WP_024566461.1	aminoglycoside 6'-N-acetyltransferase	NF043067.1	aminoglycoside 6'-N-acetyltransferase	4
GCA_019264645.1	Sediminibacterium sp.	MBW0162466.1	bla	BlaB/IND/MUS family subclass B1 metallo-beta-lactamase	core	AMR	AMR	BETA-LACTAM	BETA-LACTAM	HMM	253	246	94.72	51.5	233	WP_318245543.1	BlaB/IND/MUS family subclass B1 metallo-beta-lactamase	NF012146.1	BlaB/IND/MUS family subclass B1 metallo-beta-lactamase	4
GCA_019264545.1	Sediminibacterium sp.	MBW0164043.1	aac(6')	aminoglycoside 6'-N-acetyltransferase	core	AMR	AMR	AMINOGLYCOSIDE	AMINOGLYCOSIDE	HMM	151	182	78.02	43.66	142	WP_024566461.1	aminoglycoside 6'-N-acetyltransferase	NF043067.1	aminoglycoside 6'-N-acetyltransferase	4
GCA_019264545.1	Sediminibacterium sp.	MBW0164244.1	bla	BlaB/IND/MUS family subclass B1 metallo-beta-lactamase	core	AMR	AMR	BETA-LACTAM	BETA-LACTAM	HMM	245	248	94.76	51.06	235	WP_012025466.1	BlaB/IND/MUS family subclass B1 metallo-beta-lactamase	NF012146.1	BlaB/IND/MUS family subclass B1 metallo-beta-lactamase	4
GCA_019264545.1	Sediminibacterium sp.	MBW0164315.1	bla	BlaB/IND/MUS family subclass B1 metallo-beta-lactamase	core	AMR	AMR	BETA-LACTAM	BETA-LACTAM	HMM	244	246	94.72	51.5	233	WP_318245543.1	BlaB/IND/MUS family subclass B1 metallo-beta-lactamase	NF012146.1	BlaB/IND/MUS family subclass B1 metallo-beta-lactamase	4
GCA_019264485.1	Sediminibacterium sp.	MBW0179271.1	bla	subclass B1 metallo-beta-lactamase	core	AMR	AMR	BETA-LACTAM	BETA-LACTAM	HMM	249	253	96.05	58.02	243	WP_119059468.1	subclass B1 metallo-beta-lactamase	NF033088.2	subclass B1 metallo-beta-lactamase	4
GCA_019454915.1	Chitinophagaceae bacterium	MBW7892501.1	bla	subclass B1 metallo-beta-lactamase	core	AMR	AMR	BETA-LACTAM	BETA-LACTAM	HMM	240	252	94.84	62.34	239	WP_202272142.1	subclass B1 metallo-beta-lactamase	NF033088.2	subclass B1 metallo-beta-lactamase	4
GCA_019454705.1	Taibaiella sp.	MBW7912669.1	bla	class A beta-lactamase	core	AMR	AMR	BETA-LACTAM	BETA-LACTAM	HMM	312	304	97.7	39.1	312	WP_154469535.1	class A beta-lactamase	NF033103.1	class A beta-lactamase	4
GCA_019454705.1	Taibaiella sp.	MBW7913030.1	bla	subclass B1 metallo-beta-lactamase	core	AMR	AMR	BETA-LACTAM	BETA-LACTAM	HMM	251	246	97.56	37.25	247	WP_249828070.1	subclass B1 metallo-beta-lactamase	NF033088.2	subclass B1 metallo-beta-lactamase	1
GCA_019454705.1	Taibaiella sp.	MBW7914207.1	arr	NAD(+)--rifampin ADP-ribosyltransferase	core	AMR	AMR	RIFAMYCIN	RIFAMYCIN	HMM	247	143	83.92	56.67	120	WP_063842202.1	NAD(+)--rifampin ADP-ribosyltransferase	NF033144.1	NAD(+)--rifampin ADP-ribosyltransferase	2
GCA_019492185.1	Chitinophaga rhizophila	MBW8684462.1	bla	class A beta-lactamase, subclass A2	core	AMR	AMR	BETA-LACTAM	BETA-LACTAM	HMM	294	303	94.06	49.13	287	WP_041881964.1	class A beta-lactamase, subclass A2	NF012099.1	class A beta-lactamase, subclass A2	2
GCA_019492185.1	Chitinophaga rhizophila	MBW8684752.1	aac(6')	aminoglycoside 6'-N-acetyltransferase	core	AMR	AMR	AMINOGLYCOSIDE	AMINOGLYCOSIDE	HMM	148	182	80.22	61.64	146	WP_024566461.1	aminoglycoside 6'-N-acetyltransferase	NF043067.1	aminoglycoside 6'-N-acetyltransferase	2
GCA_019492185.1	Chitinophaga rhizophila	MBW8686258.1	blaOXA	class D beta-lactamase	core	AMR	AMR	BETA-LACTAM	BETA-LACTAM	HMM	267	267	99.63	38.29	269	WP_032492122.1	class D beta-lactamase	NF012161.0	class D beta-lactamase	2
GCA_019492185.1	Chitinophaga rhizophila	MBW8687152.1	bla	subclass B3 metallo-beta-lactamase	core	AMR	AMR	BETA-LACTAM	BETA-LACTAM	HMM	295	289	95.85	59.15	284	WP_041884311.1	subclass B3 metallo-beta-lactamase	NF033105.1	subclass B3 metallo-beta-lactamase	1
GCA_019638485.1	Ferruginibacter sp.	MBX2887785.1	erm(F)	23S rRNA (adenine(2058)-N(6))-methyltransferase Erm(F)	core	AMR	AMR	LINCOSAMIDE/MACROLIDE/STREPTOGRAMIN	CLINDAMYCIN/MACROLIDE/STREPTOGRAMIN	BLASTP	266	266	100	99.62	266	WP_002682030.1	23S rRNA (adenine(2058)-N(6))-methyltransferase Erm(F)	NF012223.0	23S rRNA (adenine(2058)-N(6))-methyltransferase Erm(F)	1
GCA_019638485.1	Ferruginibacter sp.	MBX2887787.1	blaOXA	class D beta-lactamase	core	AMR	AMR	BETA-LACTAM	BETA-LACTAM	HMM	268	289	75.09	50.68	219	WP_075071939.1	class D beta-lactamase	NF012161.0	class D beta-lactamase	1
GCA_019638485.1	Ferruginibacter sp.	MBX2887791.1	arr	NAD(+)--rifampin ADP-ribosyltransferase	core	AMR	AMR	RIFAMYCIN	RIFAMYCIN	HMM	150	137	93.43	64.06	128	WP_012695486.1	NAD(+)--rifampin ADP-ribosyltransferase	NF033144.1	NAD(+)--rifampin ADP-ribosyltransferase	2
GCA_019638495.1	Taibaiella sp.	MBX2904475.1	bla	class A beta-lactamase, subclass A2	core	AMR	AMR	BETA-LACTAM	BETA-LACTAM	HMM	297	299	98.66	44.3	298	WP_063865158.1	class A beta-lactamase, subclass A2	NF012099.1	class A beta-lactamase, subclass A2	2
GCA_019638495.1	Taibaiella sp.	MBX2904657.1	arr	NAD(+)--rifampin ADP-ribosyltransferase	core	AMR	AMR	RIFAMYCIN	RIFAMYCIN	HMM	247	150	82.67	53.23	124	WP_033959319.1	NAD(+)--rifampin ADP-ribosyltransferase	NF033144.1	NAD(+)--rifampin ADP-ribosyltransferase	2
GCA_019638495.1	Taibaiella sp.	MBX2906434.1	bla	subclass B3 metallo-beta-lactamase	core	AMR	AMR	BETA-LACTAM	BETA-LACTAM	HMM	284	294	87.41	64.2	257	WP_063842712.1	subclass B3 metallo-beta-lactamase	NF033105.1	subclass B3 metallo-beta-lactamase	2
GCA_019638525.1	Ferruginibacter sp.	MBX2917747.1	blaOXA	class D beta-lactamase	core	AMR	AMR	BETA-LACTAM	BETA-LACTAM	HMM	272	262	98.85	38.91	275	WP_041816295.1	class D beta-lactamase	NF012161.0	class D beta-lactamase	1
GCA_019638525.1	Ferruginibacter sp.	MBX2919884.1	bla	BlaB/IND/MUS family subclass B1 metallo-beta-lactamase	core	AMR	AMR	BETA-LACTAM	BETA-LACTAM	HMM	245	248	95.97	52.1	238	WP_012025466.1	BlaB/IND/MUS family subclass B1 metallo-beta-lactamase	NF012146.1	BlaB/IND/MUS family subclass B1 metallo-beta-lactamase	1
GCA_019638615.1	Chitinophagaceae bacterium	MBX2921674.1	bla	subclass B3 metallo-beta-lactamase	core	AMR	AMR	BETA-LACTAM	BETA-LACTAM	HMM	286	290	96.21	62.01	279	WP_063860467.1	subclass B3 metallo-beta-lactamase	NF033105.1	subclass B3 metallo-beta-lactamase	2
GCA_019638615.1	Chitinophagaceae bacterium	MBX2925456.1	arr	NAD(+)--rifampin ADP-ribosyltransferase	core	AMR	AMR	RIFAMYCIN	RIFAMYCIN	HMM	147	143	88.81	57.48	127	WP_063842202.1	NAD(+)--rifampin ADP-ribosyltransferase	NF033144.1	NAD(+)--rifampin ADP-ribosyltransferase	2
GCA_019638615.1	Chitinophagaceae bacterium	MBX2925594.1	blaOXA	class D beta-lactamase	core	AMR	AMR	BETA-LACTAM	BETA-LACTAM	HMM	273	273	97.8	37.64	271	WP_016657654.1	class D beta-lactamase	NF012161.0	class D beta-lactamase	1
GCA_019638475.1	Chitinophagaceae bacterium	MBX2931893.1	blaOXA	class D beta-lactamase	core	AMR	AMR	BETA-LACTAM	BETA-LACTAM	HMM	269	258	96.51	40.31	258	WP_004919358.1	class D beta-lactamase	NF012161.0	class D beta-lactamase	1
GCA_019638575.1	Ferruginibacter sp.	MBX2932866.1	blaOXA	class D beta-lactamase	core	AMR	AMR	BETA-LACTAM	BETA-LACTAM	HMM	272	262	98.09	39.26	270	WP_041816295.1	class D beta-lactamase	NF012161.0	class D beta-lactamase	3
GCA_019638575.1	Ferruginibacter sp.	MBX2933877.1	merA	mercury(II) reductase	plus	STRESS	METAL	MERCURY	MERCURY	HMM	565	568	100	69.72	568	ADP02162.1	mercury(II) reductase	TIGR02053.1	mercury(II) reductase	3
GCA_019638575.1	Ferruginibacter sp.	MBX2934250.1	bla	BlaB/IND/MUS family subclass B1 metallo-beta-lactamase	core	AMR	AMR	BETA-LACTAM	BETA-LACTAM	HMM	245	248	95.97	52.94	238	WP_012025466.1	BlaB/IND/MUS family subclass B1 metallo-beta-lactamase	NF012146.1	BlaB/IND/MUS family subclass B1 metallo-beta-lactamase	3
GCA_019638635.1	Ferruginibacter sp.	MBX2938951.1	blaOXA	class D beta-lactamase	core	AMR	AMR	BETA-LACTAM	BETA-LACTAM	HMM	272	267	95.13	40.23	266	WP_003235647.1	class D beta-lactamase	NF012161.0	class D beta-lactamase	1
GCA_019638625.1	Chitinophagaceae bacterium	MBX3239543.1	blaOXA	class D beta-lactamase	core	AMR	AMR	BETA-LACTAM	BETA-LACTAM	HMM	265	258	97.29	38.13	257	WP_004919358.1	class D beta-lactamase	NF012161.0	class D beta-lactamase	2
GCA_019638625.1	Chitinophagaceae bacterium	MBX3241066.1	aac(6')	aminoglycoside 6'-N-acetyltransferase	core	AMR	AMR	AMINOGLYCOSIDE	AMINOGLYCOSIDE	HMM	150	146	99.32	39.19	148	WP_005202238.1	aminoglycoside 6'-N-acetyltransferase	NF043067.1	aminoglycoside 6'-N-acetyltransferase	2
GCA_019638625.1	Chitinophagaceae bacterium	MBX3241268.1	arr	NAD(+)--rifampin ADP-ribosyltransferase	core	AMR	AMR	RIFAMYCIN	RIFAMYCIN	HMM	119	143	83.22	55.46	119	WP_063842202.1	NAD(+)--rifampin ADP-ribosyltransferase	NF033144.1	NAD(+)--rifampin ADP-ribosyltransferase	1
GCA_019638625.1	Chitinophagaceae bacterium	MBX3241442.1	bla	subclass B3 metallo-beta-lactamase	core	AMR	AMR	BETA-LACTAM	BETA-LACTAM	HMM	285	290	96.21	60.42	283	WP_063857696.1	subclass B3 metallo-beta-lactamase	NF033105.1	subclass B3 metallo-beta-lactamase	1
GCA_019638595.1	Chitinophagaceae bacterium	MBX3254943.1	blaOXA	class D beta-lactamase	core	AMR	AMR	BETA-LACTAM	BETA-LACTAM	HMM	273	274	96.35	37.31	268	WP_063454569.1	class D beta-lactamase	NF012161.0	class D beta-lactamase	3
GCA_019638595.1	Chitinophagaceae bacterium	MBX3255404.1	arr	NAD(+)--rifampin ADP-ribosyltransferase	core	AMR	AMR	RIFAMYCIN	RIFAMYCIN	HMM	247	150	82.67	51.61	124	WP_033959319.1	NAD(+)--rifampin ADP-ribosyltransferase	NF033144.1	NAD(+)--rifampin ADP-ribosyltransferase	3
GCA_019638595.1	Chitinophagaceae bacterium	MBX3256628.1	bla	subclass B3 metallo-beta-lactamase	core	AMR	AMR	BETA-LACTAM	BETA-LACTAM	HMM	286	290	97.24	61.19	286	WP_063860467.1	subclass B3 metallo-beta-lactamase	NF033105.1	subclass B3 metallo-beta-lactamase	3
GCA_019683625.1	Thermoflavifilum sp.	MBX5438422.1	merA	mercury(II) reductase	plus	STRESS	METAL	MERCURY	MERCURY	HMM	556	568	96.65	55.74	549	ADP02162.1	mercury(II) reductase	TIGR02053.1	mercury(II) reductase	1
GCA_019689735.1	Thermoflavifilum aggregans	MBX6380230.1	merA	mercury(II) reductase	plus	STRESS	METAL	MERCURY	MERCURY	HMM	544	568	95.77	56.51	545	ADP02162.1	mercury(II) reductase	TIGR02053.1	mercury(II) reductase	1
GCA_019695015.1	Chitinophagaceae bacterium	MBX7263129.1	blaOXA	class D beta-lactamase	core	AMR	AMR	BETA-LACTAM	BETA-LACTAM	HMM	269	275	100	39.01	282	WP_274293089.1	class D beta-lactamase	NF012161.0	class D beta-lactamase	3
GCA_019739295.1	Taibaiella sp.	MBX9448421.1	bla	class A beta-lactamase	core	AMR	AMR	BETA-LACTAM	BETA-LACTAM	HMM	306	309	98.06	42.35	307	WP_059512353.1	class A beta-lactamase	NF033103.1	class A beta-lactamase	3
GCA_019739295.1	Taibaiella sp.	MBX9448608.1	arr	NAD(+)--rifampin ADP-ribosyltransferase	core	AMR	AMR	RIFAMYCIN	RIFAMYCIN	HMM	247	150	81.33	54.1	122	WP_033959319.1	NAD(+)--rifampin ADP-ribosyltransferase	NF033144.1	NAD(+)--rifampin ADP-ribosyltransferase	3
GCA_019747455.1	Chitinophagaceae bacterium	MBX9733241.1	bla	BlaB/IND/MUS family subclass B1 metallo-beta-lactamase	core	AMR	AMR	BETA-LACTAM	BETA-LACTAM	HMM	237	241	97.1	48.72	234	WP_148044405.1	BlaB/IND/MUS family subclass B1 metallo-beta-lactamase	NF012146.1	BlaB/IND/MUS family subclass B1 metallo-beta-lactamase	1
GCA_019747955.1	Chitinophagaceae bacterium	MBX9781508.1	bla	BlaB/IND/MUS family subclass B1 metallo-beta-lactamase	core	AMR	AMR	BETA-LACTAM	BETA-LACTAM	HMM	234	237	98.73	49.57	234	WP_063864592.1	BlaB/IND/MUS family subclass B1 metallo-beta-lactamase	NF012146.1	BlaB/IND/MUS family subclass B1 metallo-beta-lactamase	2
GCA_019747705.1	Chitinophagaceae bacterium	MBX9785110.1	blaOXA	class D beta-lactamase	core	AMR	AMR	BETA-LACTAM	BETA-LACTAM	HMM	269	258	98.45	39.16	263	WP_004919358.1	class D beta-lactamase	NF012161.0	class D beta-lactamase	2
GCA_019749795.1	Hydrotalea flava	MBY0348759.1	bla	BlaB/IND/MUS family subclass B1 metallo-beta-lactamase	core	AMR	AMR	BETA-LACTAM	BETA-LACTAM	HMM	248	246	95.53	49.79	235	WP_318245543.1	BlaB/IND/MUS family subclass B1 metallo-beta-lactamase	NF012146.1	BlaB/IND/MUS family subclass B1 metallo-beta-lactamase	1
GCA_019752045.1	Chitinophagaceae bacterium	MBY0476338.1	blaOXA	class D beta-lactamase	core	AMR	AMR	BETA-LACTAM	BETA-LACTAM	HMM	269	258	98.06	38.46	260	WP_004919358.1	class D beta-lactamase	NF012161.0	class D beta-lactamase	2
GCA_019752045.1	Chitinophagaceae bacterium	MBY0477133.1	bla	BlaB/IND/MUS family subclass B1 metallo-beta-lactamase	core	AMR	AMR	BETA-LACTAM	BETA-LACTAM	HMM	245	248	95.97	52.94	238	WP_012025466.1	BlaB/IND/MUS family subclass B1 metallo-beta-lactamase	NF012146.1	BlaB/IND/MUS family subclass B1 metallo-beta-lactamase	2
GCA_019752295.1	Chitinophagaceae bacterium	MBY0481022.1	bla	BlaB/IND/MUS family subclass B1 metallo-beta-lactamase	core	AMR	AMR	BETA-LACTAM	BETA-LACTAM	HMM	245	248	98.39	55.92	245	WP_012025466.1	BlaB/IND/MUS family subclass B1 metallo-beta-lactamase	NF012146.1	BlaB/IND/MUS family subclass B1 metallo-beta-lactamase	2
GCA_019752295.1	Chitinophagaceae bacterium	MBY0482571.1	blaOXA	class D beta-lactamase	core	AMR	AMR	BETA-LACTAM	BETA-LACTAM	HMM	276	269	100	38.63	277	WP_242934118.1	class D beta-lactamase	NF012161.0	class D beta-lactamase	2
GCA_019752615.1	Chitinophagaceae bacterium	MBY0534215.1	arr	NAD(+)--rifampin ADP-ribosyltransferase	core	AMR	AMR	RIFAMYCIN	RIFAMYCIN	HMM	133	150	82.67	49.19	124	WP_052238312.1	NAD(+)--rifampin ADP-ribosyltransferase	NF033144.1	NAD(+)--rifampin ADP-ribosyltransferase	1
GCA_019752615.1	Chitinophagaceae bacterium	MBY0534218.1	bla	subclass B1 metallo-beta-lactamase	core	AMR	AMR	BETA-LACTAM	BETA-LACTAM	HMM	242	241	100	49.17	242	WP_148044405.1	subclass B1 metallo-beta-lactamase	NF033088.2	subclass B1 metallo-beta-lactamase	1
GCA_019752615.1	Chitinophagaceae bacterium	MBY0534276.1	aac(6')	aminoglycoside 6'-N-acetyltransferase	core	AMR	AMR	AMINOGLYCOSIDE	AMINOGLYCOSIDE	HMM	149	182	79.67	42.76	145	WP_024566461.1	aminoglycoside 6'-N-acetyltransferase	NF043067.1	aminoglycoside 6'-N-acetyltransferase	3
GCA_019911895.1	Taibaiella sp.	MBZ0098756.1	arr	NAD(+)--rifampin ADP-ribosyltransferase	core	AMR	AMR	RIFAMYCIN	RIFAMYCIN	HMM	247	143	90.21	57.36	129	WP_063842202.1	NAD(+)--rifampin ADP-ribosyltransferase	NF033144.1	NAD(+)--rifampin ADP-ribosyltransferase	3
GCA_020034665.1	Niabella beijingensis	MBZ4191194.1	bla	subclass B3 metallo-beta-lactamase	core	AMR	AMR	BETA-LACTAM	BETA-LACTAM	HMM	300	300	94	58.51	282	WP_063842717.1	subclass B3 metallo-beta-lactamase	NF033105.1	subclass B3 metallo-beta-lactamase	3
GCA_020034665.1	Niabella beijingensis	MBZ4191839.1	arr	NAD(+)--rifampin ADP-ribosyltransferase	core	AMR	AMR	RIFAMYCIN	RIFAMYCIN	HMM	247	150	83.33	51.2	125	WP_000237816.1	NAD(+)--rifampin ADP-ribosyltransferase	NF033144.1	NAD(+)--rifampin ADP-ribosyltransferase	1
GCA_020076305.1	Flavihumibacter profundi	MBZ5857723.1	bla	BlaB/IND/MUS family subclass B1 metallo-beta-lactamase	core	AMR	AMR	BETA-LACTAM	BETA-LACTAM	HMM	245	241	99.17	57.92	240	WP_148044405.1	BlaB/IND/MUS family subclass B1 metallo-beta-lactamase	NF012146.1	BlaB/IND/MUS family subclass B1 metallo-beta-lactamase	1
GCA_020076305.1	Flavihumibacter profundi	MBZ5858141.1	arr	NAD(+)--rifampin ADP-ribosyltransferase	core	AMR	AMR	RIFAMYCIN	RIFAMYCIN	HMM	253	150	90.67	50	136	WP_052238312.1	NAD(+)--rifampin ADP-ribosyltransferase	NF033144.1	NAD(+)--rifampin ADP-ribosyltransferase	3
GCA_020403325.1	Chitinophagaceae bacterium	MCA6439560.1	bla	BlaB/IND/MUS family subclass B1 metallo-beta-lactamase	core	AMR	AMR	BETA-LACTAM	BETA-LACTAM	HMM	238	237	97.89	51.72	232	WP_063864592.1	BlaB/IND/MUS family subclass B1 metallo-beta-lactamase	NF012146.1	BlaB/IND/MUS family subclass B1 metallo-beta-lactamase	3
GCA_020403305.1	Chitinophagaceae bacterium	MCA6447003.1	bla	BlaB/IND/MUS family subclass B1 metallo-beta-lactamase	core	AMR	AMR	BETA-LACTAM	BETA-LACTAM	HMM	238	237	97.89	51.72	232	WP_063864592.1	BlaB/IND/MUS family subclass B1 metallo-beta-lactamase	NF012146.1	BlaB/IND/MUS family subclass B1 metallo-beta-lactamase	3
GCA_020403365.1	Chitinophagaceae bacterium	MCA6451199.1	blaOXA	class D beta-lactamase	core	AMR	AMR	BETA-LACTAM	BETA-LACTAM	HMM	273	274	97.81	38.13	278	WP_122630885.1	class D beta-lactamase	NF012161.0	class D beta-lactamase	1
GCA_020403345.1	Chitinophagaceae bacterium	MCA6452022.1	blaOXA	class D beta-lactamase	core	AMR	AMR	BETA-LACTAM	BETA-LACTAM	HMM	273	278	92.81	40	270	WP_231869607.1	class D beta-lactamase	NF012161.0	class D beta-lactamase	2
GCA_020403385.1	Chitinophagaceae bacterium	MCA6456121.1	blaOXA	class D beta-lactamase	core	AMR	AMR	BETA-LACTAM	BETA-LACTAM	HMM	273	274	97.81	38.13	278	WP_122630885.1	class D beta-lactamase	NF012161.0	class D beta-lactamase	2
GCA_020403405.1	Chitinophagaceae bacterium	MCA6458710.1	blaOXA	class D beta-lactamase	core	AMR	AMR	BETA-LACTAM	BETA-LACTAM	HMM	273	274	97.81	38.13	278	WP_122630885.1	class D beta-lactamase	NF012161.0	class D beta-lactamase	2
GCA_020403445.1	Chitinophagaceae bacterium	MCA6461949.1	bla	BlaB/IND/MUS family subclass B1 metallo-beta-lactamase	core	AMR	AMR	BETA-LACTAM	BETA-LACTAM	HMM	251	241	96.68	48.51	235	WP_148044405.1	BlaB/IND/MUS family subclass B1 metallo-beta-lactamase	NF012146.1	BlaB/IND/MUS family subclass B1 metallo-beta-lactamase	2
GCA_020403425.1	Chitinophagaceae bacterium	MCA6464218.1	blaOXA	class D beta-lactamase	core	AMR	AMR	BETA-LACTAM	BETA-LACTAM	HMM	273	274	97.81	38.13	278	WP_122630885.1	class D beta-lactamase	NF012161.0	class D beta-lactamase	2
GCA_020403525.1	Chitinophagaceae bacterium	MCA6467344.1	bla	BlaB/IND/MUS family subclass B1 metallo-beta-lactamase	core	AMR	AMR	BETA-LACTAM	BETA-LACTAM	HMM	251	241	96.68	48.51	235	WP_148044405.1	BlaB/IND/MUS family subclass B1 metallo-beta-lactamase	NF012146.1	BlaB/IND/MUS family subclass B1 metallo-beta-lactamase	2
GCA_020403485.1	Chitinophagaceae bacterium	MCA6470400.1	bla	BlaB/IND/MUS family subclass B1 metallo-beta-lactamase	core	AMR	AMR	BETA-LACTAM	BETA-LACTAM	HMM	251	241	96.68	48.51	235	WP_148044405.1	BlaB/IND/MUS family subclass B1 metallo-beta-lactamase	NF012146.1	BlaB/IND/MUS family subclass B1 metallo-beta-lactamase	3
GCA_020403545.1	Chitinophagaceae bacterium	MCA6474374.1	bla	subclass B1 metallo-beta-lactamase	core	AMR	AMR	BETA-LACTAM	BETA-LACTAM	HMM	225	241	87.55	47.89	213	WP_148044405.1	subclass B1 metallo-beta-lactamase	NF033088.2	subclass B1 metallo-beta-lactamase	3
GCA_020403455.1	Chitinophagaceae bacterium	MCA6476427.1	bla	BlaB/IND/MUS family subclass B1 metallo-beta-lactamase	core	AMR	AMR	BETA-LACTAM	BETA-LACTAM	HMM	251	241	96.68	48.51	235	WP_148044405.1	BlaB/IND/MUS family subclass B1 metallo-beta-lactamase	NF012146.1	BlaB/IND/MUS family subclass B1 metallo-beta-lactamase	3
GCA_020403505.1	Chitinophagaceae bacterium	MCA6480723.1	bla	BlaB/IND/MUS family subclass B1 metallo-beta-lactamase	core	AMR	AMR	BETA-LACTAM	BETA-LACTAM	HMM	251	241	96.68	48.51	235	WP_148044405.1	BlaB/IND/MUS family subclass B1 metallo-beta-lactamase	NF012146.1	BlaB/IND/MUS family subclass B1 metallo-beta-lactamase	1
GCA_020403585.1	Chitinophagaceae bacterium	MCA6482836.1	bla	BlaB/IND/MUS family subclass B1 metallo-beta-lactamase	core	AMR	AMR	BETA-LACTAM	BETA-LACTAM	HMM	251	241	96.68	48.51	235	WP_148044405.1	BlaB/IND/MUS family subclass B1 metallo-beta-lactamase	NF012146.1	BlaB/IND/MUS family subclass B1 metallo-beta-lactamase	1
GCA_020403625.1	Chitinophagaceae bacterium	MCA6483938.1	bla	BlaB/IND/MUS family subclass B1 metallo-beta-lactamase	core	AMR	AMR	BETA-LACTAM	BETA-LACTAM	HMM	251	241	96.68	48.51	235	WP_148044405.1	BlaB/IND/MUS family subclass B1 metallo-beta-lactamase	NF012146.1	BlaB/IND/MUS family subclass B1 metallo-beta-lactamase	1
GCA_020403685.1	Chitinophagaceae bacterium	MCA6493141.1	bla	BlaB/IND/MUS family subclass B1 metallo-beta-lactamase	core	AMR	AMR	BETA-LACTAM	BETA-LACTAM	HMM	251	241	96.68	48.51	235	WP_148044405.1	BlaB/IND/MUS family subclass B1 metallo-beta-lactamase	NF012146.1	BlaB/IND/MUS family subclass B1 metallo-beta-lactamase	3
GCA_020403785.1	Chitinophagaceae bacterium	MCA6498311.1	bla	BlaB/IND/MUS family subclass B1 metallo-beta-lactamase	core	AMR	AMR	BETA-LACTAM	BETA-LACTAM	HMM	251	241	96.68	48.51	235	WP_148044405.1	BlaB/IND/MUS family subclass B1 metallo-beta-lactamase	NF012146.1	BlaB/IND/MUS family subclass B1 metallo-beta-lactamase	3
GCA_020403725.1	Chitinophagaceae bacterium	MCA6511342.1	bla	BlaB/IND/MUS family subclass B1 metallo-beta-lactamase	core	AMR	AMR	BETA-LACTAM	BETA-LACTAM	HMM	251	241	96.68	48.51	235	WP_148044405.1	BlaB/IND/MUS family subclass B1 metallo-beta-lactamase	NF012146.1	BlaB/IND/MUS family subclass B1 metallo-beta-lactamase	3
GCA_020437255.1	Chitinophagaceae bacterium	MCB0699078.1	bla	subclass B1 metallo-beta-lactamase	core	AMR	AMR	BETA-LACTAM	BETA-LACTAM	HMM	244	246	95.12	36.25	240	WP_318245543.1	subclass B1 metallo-beta-lactamase	NF033088.2	subclass B1 metallo-beta-lactamase	1
GCA_020437255.1	Chitinophagaceae bacterium	MCB0700567.1	arsN1	arsinothricin resistance N-acetyltransferase ArsN1 family B	plus	STRESS	METAL	ARSENIC	ARSENIC	HMM	181	186	91.4	43.53	170	AAN67541.1	arsinothricin resistance N-acetyltransferase ArsN1 family B	NF040504.1	arsinothricin resistance N-acetyltransferase ArsN1 family B	1
GCA_020437305.1	Chitinophagaceae bacterium	MCB0708567.1	blaOXA	class D beta-lactamase	core	AMR	AMR	BETA-LACTAM	BETA-LACTAM	HMM	244	262	86.26	41.42	239	WP_041816295.1	class D beta-lactamase	NF012161.0	class D beta-lactamase	3
GCA_020437365.1	Chitinophagaceae bacterium	MCB0716397.1	arsN1	arsinothricin resistance N-acetyltransferase ArsN1 family B	plus	STRESS	METAL	ARSENIC	ARSENIC	HMM	196	186	97.31	44.75	181	AAN67541.1	arsinothricin resistance N-acetyltransferase ArsN1 family B	NF040504.1	arsinothricin resistance N-acetyltransferase ArsN1 family B	3
GCA_020437625.1	Chitinophagaceae bacterium	MCB0740962.1	arsN1	arsinothricin resistance N-acetyltransferase ArsN1 family B	plus	STRESS	METAL	ARSENIC	ARSENIC	HMM	196	186	97.31	44.75	181	AAN67541.1	arsinothricin resistance N-acetyltransferase ArsN1 family B	NF040504.1	arsinothricin resistance N-acetyltransferase ArsN1 family B	3
GCA_020437835.1	Chitinophagaceae bacterium	MCB0775645.1	bla	BlaB/IND/MUS family subclass B1 metallo-beta-lactamase	core	AMR	AMR	BETA-LACTAM	BETA-LACTAM	HMM	247	248	99.6	52.63	247	WP_012025466.1	BlaB/IND/MUS family subclass B1 metallo-beta-lactamase	NF012146.1	BlaB/IND/MUS family subclass B1 metallo-beta-lactamase	1
GCA_020847395.1	Chitinophagaceae bacterium	MCC6289675.1	bla	subclass B3 metallo-beta-lactamase	core	AMR	AMR	BETA-LACTAM	BETA-LACTAM	HMM	286	290	97.24	62.24	286	WP_063860467.1	subclass B3 metallo-beta-lactamase	NF033105.1	subclass B3 metallo-beta-lactamase	1
GCA_020847395.1	Chitinophagaceae bacterium	MCC6290193.1	blaOXA	class D beta-lactamase	core	AMR	AMR	BETA-LACTAM	BETA-LACTAM	HMM	270	258	97.67	38.93	262	WP_004919358.1	class D beta-lactamase	NF012161.0	class D beta-lactamase	1
GCA_020849225.1	Chitinophagaceae bacterium	MCC6633904.1	blaOXA	class D beta-lactamase	core	AMR	AMR	BETA-LACTAM	BETA-LACTAM	HMM	269	258	99.61	40.91	264	WP_004919358.1	class D beta-lactamase	NF012161.0	class D beta-lactamase	3
GCA_020849545.1	Chitinophagaceae bacterium	MCC6691865.1	bla	BlaB/IND/MUS family subclass B1 metallo-beta-lactamase	core	AMR	AMR	BETA-LACTAM	BETA-LACTAM	HMM	234	241	94.19	53.95	228	WP_148044405.1	BlaB/IND/MUS family subclass B1 metallo-beta-lactamase	NF012146.1	BlaB/IND/MUS family subclass B1 metallo-beta-lactamase	3
GCA_020848815.1	Chitinophagaceae bacterium	MCC6761496.1	bla	metallo-beta-lactamase	core	AMR	AMR	BETA-LACTAM	BETA-LACTAM	HMM	205	237	82.28	51.28	195	WP_063864592.1	metallo-beta-lactamase	NF012229.1	metallo-beta-lactamase	3
GCA_020850485.1	Chitinophagaceae bacterium	MCC7378694.1	blaOXA	class D beta-lactamase	core	AMR	AMR	BETA-LACTAM	BETA-LACTAM	HMM	272	262	98.85	38.91	275	WP_041816295.1	class D beta-lactamase	NF012161.0	class D beta-lactamase	1
GCA_020850485.1	Chitinophagaceae bacterium	MCC7379039.1	bla	BlaB/IND/MUS family subclass B1 metallo-beta-lactamase	core	AMR	AMR	BETA-LACTAM	BETA-LACTAM	HMM	245	248	95.97	52.1	238	WP_012025466.1	BlaB/IND/MUS family subclass B1 metallo-beta-lactamase	NF012146.1	BlaB/IND/MUS family subclass B1 metallo-beta-lactamase	1
GCA_020854215.1	Chitinophagaceae bacterium	MCC7525123.1	bla	BlaB/IND/MUS family subclass B1 metallo-beta-lactamase	core	AMR	AMR	BETA-LACTAM	BETA-LACTAM	HMM	245	241	100	52.07	242	WP_148044405.1	BlaB/IND/MUS family subclass B1 metallo-beta-lactamase	NF012146.1	BlaB/IND/MUS family subclass B1 metallo-beta-lactamase	1
GCA_020854215.1	Chitinophagaceae bacterium	MCC7526352.1	blaOXA	class D beta-lactamase	core	AMR	AMR	BETA-LACTAM	BETA-LACTAM	HMM	272	276	98.55	36.96	276	WP_122634439.1	class D beta-lactamase	NF012161.0	class D beta-lactamase	1
GCA_021044425.1	Niabella pedocola	MCD2421735.1	arr	NAD(+)--rifampin ADP-ribosyltransferase	core	AMR	AMR	RIFAMYCIN	RIFAMYCIN	HMM	247	137	90.51	51.61	124	WP_012695486.1	NAD(+)--rifampin ADP-ribosyltransferase	NF033144.1	NAD(+)--rifampin ADP-ribosyltransferase	1
GCA_021044425.1	Niabella pedocola	MCD2422001.1	bla	subclass B3 metallo-beta-lactamase	core	AMR	AMR	BETA-LACTAM	BETA-LACTAM	HMM	296	300	93.33	59.64	280	WP_063842717.1	subclass B3 metallo-beta-lactamase	NF033105.1	subclass B3 metallo-beta-lactamase	1
GCA_021155965.1	Flavipsychrobacter sp.	MCD6012793.1	arr	NAD(+)--rifampin ADP-ribosyltransferase	core	AMR	AMR	RIFAMYCIN	RIFAMYCIN	HMM	137	143	90.91	61.54	130	WP_063842202.1	NAD(+)--rifampin ADP-ribosyltransferase	NF033144.1	NAD(+)--rifampin ADP-ribosyltransferase	2
GCA_021155965.1	Flavipsychrobacter sp.	MCD6013267.1	bla	class A beta-lactamase, subclass A2	core	AMR	AMR	BETA-LACTAM	BETA-LACTAM	HMM	299	301	98.01	46.62	296	WP_032494759.1	class A beta-lactamase, subclass A2	NF012099.1	class A beta-lactamase, subclass A2	2
GCA_021155965.1	Flavipsychrobacter sp.	MCD6013775.1	bla	subclass B3 metallo-beta-lactamase	core	AMR	AMR	BETA-LACTAM	BETA-LACTAM	HMM	290	289	96.89	58.93	280	WP_041884311.1	subclass B3 metallo-beta-lactamase	NF033105.1	subclass B3 metallo-beta-lactamase	1
GCA_021156265.1	Flavipsychrobacter sp.	MCD6062324.1	bla	subclass B1 metallo-beta-lactamase	core	AMR	AMR	BETA-LACTAM	BETA-LACTAM	HMM	245	247	94.74	48.73	236	WP_013992183.1	subclass B1 metallo-beta-lactamase	NF033088.2	subclass B1 metallo-beta-lactamase	1
GCA_021491375.1	Flavihumibacter fluminis	MCF1713764.1	aph(3')	APH(3') family aminoglycoside O-phosphotransferase	core	AMR	AMR	AMINOGLYCOSIDE	AMINOGLYCOSIDE	HMM	251	264	93.18	36.59	246	WP_063842179.1	APH(3') family aminoglycoside O-phosphotransferase	NF033068.1	APH(3') family aminoglycoside O-phosphotransferase	1
GCA_021491375.1	Flavihumibacter fluminis	MCF1714656.1	arr	NAD(+)--rifampin ADP-ribosyltransferase	core	AMR	AMR	RIFAMYCIN	RIFAMYCIN	HMM	138	137	96.35	59.09	132	WP_012695486.1	NAD(+)--rifampin ADP-ribosyltransferase	NF033144.1	NAD(+)--rifampin ADP-ribosyltransferase	1
GCA_021491375.1	Flavihumibacter fluminis	MCF1715351.1	arsN2	arsenic resistance N-acetyltransferase ArsN2	plus	STRESS	METAL	ARSENIC	ARSENIC	HMM	148	147	92.52	35.29	136	ABG05788.1	arsenic resistance N-acetyltransferase ArsN2	NF040501.1	arsenic resistance N-acetyltransferase ArsN2	1
GCA_021491375.1	Flavihumibacter fluminis	MCF1716017.1	bla	subclass B1 metallo-beta-lactamase	core	AMR	AMR	BETA-LACTAM	BETA-LACTAM	HMM	392	247	98.79	47.13	244	WP_013992183.1	subclass B1 metallo-beta-lactamase	NF033088.2	subclass B1 metallo-beta-lactamase	1
GCA_021538615.1	Niabella agricola	MCF3107999.1	arr	NAD(+)--rifampin ADP-ribosyltransferase	core	AMR	AMR	RIFAMYCIN	RIFAMYCIN	HMM	247	150	82.67	53.23	124	WP_000237816.1	NAD(+)--rifampin ADP-ribosyltransferase	NF033144.1	NAD(+)--rifampin ADP-ribosyltransferase	1
GCA_021538615.1	Niabella agricola	MCF3108439.1	bla	subclass B3 metallo-beta-lactamase	core	AMR	AMR	BETA-LACTAM	BETA-LACTAM	HMM	296	300	93.33	60.71	280	WP_063842717.1	subclass B3 metallo-beta-lactamase	NF033105.1	subclass B3 metallo-beta-lactamase	2
GCA_021646545.1	Chitinophaga filiformis	MCF6402044.1	blaOXA	class D beta-lactamase	core	AMR	AMR	BETA-LACTAM	BETA-LACTAM	HMM	267	285	86.67	41.6	250	WP_058375744.1	class D beta-lactamase	NF012161.0	class D beta-lactamase	2
GCA_021646545.1	Chitinophaga filiformis	MCF6404898.1	bla	subclass B3 metallo-beta-lactamase	core	AMR	AMR	BETA-LACTAM	BETA-LACTAM	HMM	295	289	99.65	64.71	289	WP_041884311.1	subclass B3 metallo-beta-lactamase	NF033105.1	subclass B3 metallo-beta-lactamase	1
GCA_021646545.1	Chitinophaga filiformis	MCF6406640.1	bla	class A beta-lactamase, subclass A2	core	AMR	AMR	BETA-LACTAM	BETA-LACTAM	HMM	296	303	97.69	51.35	296	WP_041881964.1	class A beta-lactamase, subclass A2	NF012099.1	class A beta-lactamase, subclass A2	2
GCA_021740795.1	Chitinophagaceae bacterium	MCF8422445.1	bla	subclass B1 metallo-beta-lactamase	core	AMR	AMR	BETA-LACTAM	BETA-LACTAM	HMM	251	253	97.63	61.2	250	WP_119059468.1	subclass B1 metallo-beta-lactamase	NF033088.2	subclass B1 metallo-beta-lactamase	2
GCA_022012415.1	Terrimonas ginsenosidimutans	MCG2612841.1	bla	class A beta-lactamase	core	AMR	AMR	BETA-LACTAM	BETA-LACTAM	HMM	301	299	96.99	36.95	295	WP_065825678.1	class A beta-lactamase	NF033103.1	class A beta-lactamase	1
GCA_022012415.1	Terrimonas ginsenosidimutans	MCG2614321.1	bla	subclass B3 metallo-beta-lactamase	core	AMR	AMR	BETA-LACTAM	BETA-LACTAM	HMM	296	293	94.2	58.01	281	WP_063842707.1	subclass B3 metallo-beta-lactamase	NF033105.1	subclass B3 metallo-beta-lactamase	2
GCA_022352215.1	Flavihumibacter cheonanensis	MCG7750959.1	arr	NAD(+)--rifampin ADP-ribosyltransferase	core	AMR	AMR	RIFAMYCIN	RIFAMYCIN	HMM	138	137	96.35	59.85	132	WP_012695486.1	NAD(+)--rifampin ADP-ribosyltransferase	NF033144.1	NAD(+)--rifampin ADP-ribosyltransferase	2
GCA_022352215.1	Flavihumibacter cheonanensis	MCG7752281.1	aph(3')	APH(3') family aminoglycoside O-phosphotransferase	core	AMR	AMR	AMINOGLYCOSIDE	AMINOGLYCOSIDE	HMM	251	267	92.13	37.75	249	WP_012479999.1	APH(3') family aminoglycoside O-phosphotransferase	NF033068.1	APH(3') family aminoglycoside O-phosphotransferase	1
GCA_022352215.1	Flavihumibacter cheonanensis	MCG7752865.1	arsN2	arsenic resistance N-acetyltransferase ArsN2	plus	STRESS	METAL	ARSENIC	ARSENIC	HMM	148	142	100	31.69	142	ABB05616.1	arsenic resistance N-acetyltransferase ArsN2	NF040501.1	arsenic resistance N-acetyltransferase ArsN2	2
GCA_022352215.1	Flavihumibacter cheonanensis	MCG7753524.1	bla	subclass B1 metallo-beta-lactamase	core	AMR	AMR	BETA-LACTAM	BETA-LACTAM	HMM	398	247	96.76	47.7	239	WP_013992183.1	subclass B1 metallo-beta-lactamase	NF033088.2	subclass B1 metallo-beta-lactamase	2
GCA_022352285.1	Flavihumibacter sediminis	MCG7855873.1	arr	NAD(+)--rifampin ADP-ribosyltransferase	core	AMR	AMR	RIFAMYCIN	RIFAMYCIN	HMM	148	137	97.08	58.65	133	WP_012695486.1	NAD(+)--rifampin ADP-ribosyltransferase	NF033144.1	NAD(+)--rifampin ADP-ribosyltransferase	1
GCA_022352285.1	Flavihumibacter sediminis	MCG7856401.1	bla	subclass B1 metallo-beta-lactamase	core	AMR	AMR	BETA-LACTAM	BETA-LACTAM	HMM	268	253	99.21	49.81	263	WP_119059468.1	subclass B1 metallo-beta-lactamase	NF033088.2	subclass B1 metallo-beta-lactamase	1
GCA_022352285.1	Flavihumibacter sediminis	MCG7856830.1	arsN2	arsenic resistance N-acetyltransferase ArsN2	plus	STRESS	METAL	ARSENIC	ARSENIC	HMM	146	142	97.18	35.51	138	ABB05616.1	arsenic resistance N-acetyltransferase ArsN2	NF040501.1	arsenic resistance N-acetyltransferase ArsN2	1
GCA_022352285.1	Flavihumibacter sediminis	MCG7857009.1	arr	NAD(+)--rifampin ADP-ribosyltransferase	core	AMR	AMR	RIFAMYCIN	RIFAMYCIN	HMM	136	137	93.43	63.28	128	WP_012695486.1	NAD(+)--rifampin ADP-ribosyltransferase	NF033144.1	NAD(+)--rifampin ADP-ribosyltransferase	1
GCA_022352285.1	Flavihumibacter sediminis	MCG7859010.1	espB	type III secretion system LEE translocon pore-forming subunit EspB	plus	VIRULENCE	VIRULENCE	NA	NA	PARTIALP	160	312	51.28	100	160	AAG58818.1	type III secretion system LEE translocon pore-forming subunit EspB	NA	NA	1
GCA_022352285.1	Flavihumibacter sediminis	MCG7859061.1	espA	type III secretion system LEE translocon filament protein EspA	plus	VIRULENCE	VIRULENCE	NA	NA	PARTIALP	149	192	77.6	99.33	149	CAA73506.1	type III secretion system LEE translocon filament protein EspA	NA	NA	1
GCA_022513635.1	Niabella ginsengisoli	MCH5598422.1	bla	subclass B3 metallo-beta-lactamase	core	AMR	AMR	BETA-LACTAM	BETA-LACTAM	HMM	284	290	92.41	66.42	268	WP_078793281.1	subclass B3 metallo-beta-lactamase	NF033105.1	subclass B3 metallo-beta-lactamase	1
GCA_022513635.1	Niabella ginsengisoli	MCH5599029.1	bla	subclass B3 metallo-beta-lactamase	core	AMR	AMR	BETA-LACTAM	BETA-LACTAM	HMM	284	290	92.41	66.42	268	WP_078793281.1	subclass B3 metallo-beta-lactamase	NF033105.1	subclass B3 metallo-beta-lactamase	3
GCA_022513635.1	Niabella ginsengisoli	MCH5600003.1	arr	NAD(+)--rifampin ADP-ribosyltransferase	core	AMR	AMR	RIFAMYCIN	RIFAMYCIN	HMM	138	143	88.11	52.38	126	WP_063842202.1	NAD(+)--rifampin ADP-ribosyltransferase	NF033144.1	NAD(+)--rifampin ADP-ribosyltransferase	3
GCA_022512515.1	Niabella hibiscisoli	MCH5720166.1	arr	NAD(+)--rifampin ADP-ribosyltransferase	core	AMR	AMR	RIFAMYCIN	RIFAMYCIN	HMM	247	150	90.67	50	136	WP_000237816.1	NAD(+)--rifampin ADP-ribosyltransferase	NF033144.1	NAD(+)--rifampin ADP-ribosyltransferase	3
GCA_023156195.1	Chitinophaga sedimenti	MCK7554972.1	bla	subclass B3 metallo-beta-lactamase	core	AMR	AMR	BETA-LACTAM	BETA-LACTAM	HMM	281	293	91.81	66.17	269	WP_063842707.1	subclass B3 metallo-beta-lactamase	NF033105.1	subclass B3 metallo-beta-lactamase	2
GCA_023156195.1	Chitinophaga sedimenti	MCK7557578.1	arr	NAD(+)--rifampin ADP-ribosyltransferase	core	AMR	AMR	RIFAMYCIN	RIFAMYCIN	HMM	145	143	88.81	60.63	127	WP_063842202.1	NAD(+)--rifampin ADP-ribosyltransferase	NF033144.1	NAD(+)--rifampin ADP-ribosyltransferase	2
GCA_023511875.1	Thermoflavifilum sp.	MCL6524283.1	merA	mercury(II) reductase	plus	STRESS	METAL	MERCURY	MERCURY	HMM	560	568	97.36	58.77	553	ADP02162.1	mercury(II) reductase	TIGR02053.1	mercury(II) reductase	2
GCA_023721715.1	Parasegetibacter sp. NRK P23	MCM5527528.1	arr	NAD(+)--rifampin ADP-ribosyltransferase	core	AMR	AMR	RIFAMYCIN	RIFAMYCIN	HMM	108	137	62.77	62.79	86	WP_012695486.1	NAD(+)--rifampin ADP-ribosyltransferase	NF033144.1	NAD(+)--rifampin ADP-ribosyltransferase	2
GCA_023721715.1	Parasegetibacter sp. NRK P23	MCM5528424.1	bla	BlaB/IND/MUS family subclass B1 metallo-beta-lactamase	core	AMR	AMR	BETA-LACTAM	BETA-LACTAM	HMM	242	241	99.17	55.83	240	WP_148044405.1	BlaB/IND/MUS family subclass B1 metallo-beta-lactamase	NF012146.1	BlaB/IND/MUS family subclass B1 metallo-beta-lactamase	2
GCA_023957125.1	Chitinophagaceae bacterium	MCO5238383.1	bla	subclass B1 metallo-beta-lactamase	core	AMR	AMR	BETA-LACTAM	BETA-LACTAM	HMM	252	253	98.02	69.76	248	WP_119059468.1	subclass B1 metallo-beta-lactamase	NF033088.2	subclass B1 metallo-beta-lactamase	2
GCA_023957155.1	Chitinophagaceae bacterium	MCO5238615.1	blaOXA	class D beta-lactamase	core	AMR	AMR	BETA-LACTAM	BETA-LACTAM	HMM	272	258	95.35	41.18	255	WP_004919358.1	class D beta-lactamase	NF012161.0	class D beta-lactamase	1
GCA_023957755.1	Chitinophagaceae bacterium	MCO5286192.1	arr	NAD(+)--rifampin ADP-ribosyltransferase	core	AMR	AMR	RIFAMYCIN	RIFAMYCIN	HMM	114	137	60.58	57.83	83	WP_012695486.1	NAD(+)--rifampin ADP-ribosyltransferase	NF033144.1	NAD(+)--rifampin ADP-ribosyltransferase	1
GCA_023957755.1	Chitinophagaceae bacterium	MCO5286193.1	lnu(I)	lincosamide nucleotidyltransferase Lnu(I)	core	AMR	AMR	LINCOSAMIDE	LINCOSAMIDE	PARTIALP	196	256	73.83	99.47	189	WP_008992950.1	lincosamide nucleotidyltransferase Lnu(I)	NA	NA	1
GCA_024103425.1	Chitinophagaceae bacterium	MCO6498624.1	bla	class A beta-lactamase, subclass A2	core	AMR	AMR	BETA-LACTAM	BETA-LACTAM	HMM	339	304	100	87.17	304	WP_154469535.1	class A beta-lactamase, subclass A2	NF012099.1	class A beta-lactamase, subclass A2	2
GCA_024343615.1	Ferruginibacter sp. HRS2-29	MCP9751367.1	bla	subclass B3 metallo-beta-lactamase	core	AMR	AMR	BETA-LACTAM	BETA-LACTAM	HMM	292	293	94.88	64.16	279	WP_063842707.1	subclass B3 metallo-beta-lactamase	NF033105.1	subclass B3 metallo-beta-lactamase	2
GCA_024343615.1	Ferruginibacter sp. HRS2-29	MCP9752565.1	blaOXA	class D beta-lactamase	core	AMR	AMR	BETA-LACTAM	BETA-LACTAM	HMM	274	269	98.14	37.69	268	WP_063864100.1	class D beta-lactamase	NF012161.0	class D beta-lactamase	2
GCA_024707305.1	Chitinophagaceae bacterium	MCR6719424.1	arr	NAD(+)--rifampin ADP-ribosyltransferase	core	AMR	AMR	RIFAMYCIN	RIFAMYCIN	HMM	142	137	97.08	60.15	133	WP_012695486.1	NAD(+)--rifampin ADP-ribosyltransferase	NF033144.1	NAD(+)--rifampin ADP-ribosyltransferase	2
GCA_024809215.1	Niastella sp. OAS944	MCS3795661.1	arsN2	arsenic resistance N-acetyltransferase ArsN2	plus	STRESS	METAL	ARSENIC	ARSENIC	HMM	142	147	85.03	38.46	130	ABG05788.1	arsenic resistance N-acetyltransferase ArsN2	NF040501.1	arsenic resistance N-acetyltransferase ArsN2	1
GCA_024809215.1	Niastella sp. OAS944	MCS3799614.1	bla	subclass B3 metallo-beta-lactamase	core	AMR	AMR	BETA-LACTAM	BETA-LACTAM	HMM	288	294	95.58	57.54	285	WP_063842712.1	subclass B3 metallo-beta-lactamase	NF033105.1	subclass B3 metallo-beta-lactamase	1
GCA_025455365.1	Chitinophagaceae bacterium	MCU0380035.1	bla	BlaB/IND/MUS family subclass B1 metallo-beta-lactamase	core	AMR	AMR	BETA-LACTAM	BETA-LACTAM	HMM	236	241	95.44	55.6	232	WP_148044405.1	BlaB/IND/MUS family subclass B1 metallo-beta-lactamase	NF012146.1	BlaB/IND/MUS family subclass B1 metallo-beta-lactamase	2
GCA_025455285.1	Flavihumibacter sp.	MCU0385345.1	aph(3')	APH(3') family aminoglycoside O-phosphotransferase	core	AMR	AMR	AMINOGLYCOSIDE	AMINOGLYCOSIDE	HMM	251	264	93.18	36.59	246	WP_063842179.1	APH(3') family aminoglycoside O-phosphotransferase	NF033068.1	APH(3') family aminoglycoside O-phosphotransferase	2
GCA_025455205.1	Chitinophagaceae bacterium	MCU0395124.1	arsN2	arsenic resistance N-acetyltransferase ArsN2	plus	STRESS	METAL	ARSENIC	ARSENIC	HMM	283	164	82.32	37.78	135	ABU58394.1	arsenic resistance N-acetyltransferase ArsN2	NF040501.1	arsenic resistance N-acetyltransferase ArsN2	2
GCA_025628885.1	Paraflavisolibacter caeni	MCU7551267.1	blaOXA	class D beta-lactamase	core	AMR	AMR	BETA-LACTAM	BETA-LACTAM	HMM	268	258	93.8	42.52	254	WP_004919358.1	class D beta-lactamase	NF012161.0	class D beta-lactamase	2
GCA_025631005.1	Haoranjiania flava	MCU7692902.1	aph(3')	APH(3') family aminoglycoside O-phosphotransferase	core	AMR	AMR	AMINOGLYCOSIDE	AMINOGLYCOSIDE	HMM	262	264	96.59	32.3	257	WP_001096887.1	APH(3') family aminoglycoside O-phosphotransferase	NF033068.1	APH(3') family aminoglycoside O-phosphotransferase	2
GCA_025631005.1	Haoranjiania flava	MCU7692913.1	aadS	AadS family aminoglycoside 6-adenylyltransferase	core	AMR	AMR	AMINOGLYCOSIDE	STREPTOMYCIN	HMM	285	287	98.95	60.56	284	WP_003013318.1	AadS family aminoglycoside 6-adenylyltransferase	NF033387.1	AadS family aminoglycoside 6-adenylyltransferase	2
GCA_025631005.1	Haoranjiania flava	MCU7695294.1	arr	NAD(+)--rifampin ADP-ribosyltransferase	core	AMR	AMR	RIFAMYCIN	RIFAMYCIN	HMM	146	137	93.43	57.81	128	WP_012695486.1	NAD(+)--rifampin ADP-ribosyltransferase	NF033144.1	NAD(+)--rifampin ADP-ribosyltransferase	2
GCA_025963635.1	Ferruginibacter sp.	MCW3091056.1	bla	subclass B3 metallo-beta-lactamase	core	AMR	AMR	BETA-LACTAM	BETA-LACTAM	HMM	296	289	99.65	62.85	288	WP_041884311.1	subclass B3 metallo-beta-lactamase	NF033105.1	subclass B3 metallo-beta-lactamase	2
GCA_025963515.1	Segetibacter sp.	MCW3108203.1	arr	NAD(+)--rifampin ADP-ribosyltransferase	core	AMR	AMR	RIFAMYCIN	RIFAMYCIN	HMM	237	150	80.67	54.55	121	WP_033959319.1	NAD(+)--rifampin ADP-ribosyltransferase	NF033144.1	NAD(+)--rifampin ADP-ribosyltransferase	2
GCA_025963515.1	Segetibacter sp.	MCW3108930.1	arr	NAD(+)--rifampin ADP-ribosyltransferase	core	AMR	AMR	RIFAMYCIN	RIFAMYCIN	HMM	171	150	82.67	54.03	124	WP_000237816.1	NAD(+)--rifampin ADP-ribosyltransferase	NF033144.1	NAD(+)--rifampin ADP-ribosyltransferase	2
GCA_025963465.1	Flavipsychrobacter sp.	MCW3121605.1	bla	class A beta-lactamase	core	AMR	AMR	BETA-LACTAM	BETA-LACTAM	HMM	287	301	93.02	48.4	281	WP_032494759.1	class A beta-lactamase	NF033103.1	class A beta-lactamase	1
GCA_025989125.1	Chitinophaga nivalis	MCW3462241.1	blaOXA	class D beta-lactamase	core	AMR	AMR	BETA-LACTAM	BETA-LACTAM	HMM	262	289	83.04	41.13	248	WP_075071939.1	class D beta-lactamase	NF012161.0	class D beta-lactamase	1
GCA_025989125.1	Chitinophaga nivalis	MCW3462983.1	aac(6')	aminoglycoside 6'-N-acetyltransferase	core	AMR	AMR	AMINOGLYCOSIDE	AMINOGLYCOSIDE	HMM	146	182	78.02	55.24	143	WP_024566461.1	aminoglycoside 6'-N-acetyltransferase	NF043067.1	aminoglycoside 6'-N-acetyltransferase	3
GCA_025989125.1	Chitinophaga nivalis	MCW3463037.1	bla	class A beta-lactamase, subclass A2	core	AMR	AMR	BETA-LACTAM	BETA-LACTAM	HMM	300	304	97.37	51.52	297	WP_154469535.1	class A beta-lactamase, subclass A2	NF012099.1	class A beta-lactamase, subclass A2	3
GCA_025989125.1	Chitinophaga nivalis	MCW3464442.1	bla	class A beta-lactamase	core	AMR	AMR	BETA-LACTAM	BETA-LACTAM	HMM	302	319	84.33	49.63	270	WP_063842272.1	class A beta-lactamase	NF033103.1	class A beta-lactamase	3
GCA_025989125.1	Chitinophaga nivalis	MCW3465284.1	catB	type B chloramphenicol O-acetyltransferase	core	AMR	AMR	PHENICOL	CHLORAMPHENICOL	HMM	211	210	97.14	75.98	204	WP_000800689.1	type B chloramphenicol O-acetyltransferase	NF000490.1	type B chloramphenicol O-acetyltransferase	1
GCA_025989125.1	Chitinophaga nivalis	MCW3466983.1	bla	subclass B3 metallo-beta-lactamase	core	AMR	AMR	BETA-LACTAM	BETA-LACTAM	HMM	291	300	95.67	65.16	287	WP_063842717.1	subclass B3 metallo-beta-lactamase	NF033105.1	subclass B3 metallo-beta-lactamase	2
GCA_025989205.1	Chitinophaga nivalis	MCW3483326.1	bla	subclass B3 metallo-beta-lactamase	core	AMR	AMR	BETA-LACTAM	BETA-LACTAM	HMM	291	300	95.67	65.16	287	WP_063842717.1	subclass B3 metallo-beta-lactamase	NF033105.1	subclass B3 metallo-beta-lactamase	2
GCA_025989205.1	Chitinophaga nivalis	MCW3485024.1	catB	type B chloramphenicol O-acetyltransferase	core	AMR	AMR	PHENICOL	CHLORAMPHENICOL	HMM	211	210	97.14	75.98	204	WP_000800689.1	type B chloramphenicol O-acetyltransferase	NF000490.1	type B chloramphenicol O-acetyltransferase	1
GCA_025989205.1	Chitinophaga nivalis	MCW3485867.1	bla	class A beta-lactamase	core	AMR	AMR	BETA-LACTAM	BETA-LACTAM	HMM	302	319	84.33	49.63	270	WP_063842272.1	class A beta-lactamase	NF033103.1	class A beta-lactamase	1
GCA_025989205.1	Chitinophaga nivalis	MCW3487273.1	bla	class A beta-lactamase, subclass A2	core	AMR	AMR	BETA-LACTAM	BETA-LACTAM	HMM	300	304	97.37	51.52	297	WP_154469535.1	class A beta-lactamase, subclass A2	NF012099.1	class A beta-lactamase, subclass A2	1
GCA_025989205.1	Chitinophaga nivalis	MCW3487327.1	aac(6')	aminoglycoside 6'-N-acetyltransferase	core	AMR	AMR	AMINOGLYCOSIDE	AMINOGLYCOSIDE	HMM	146	182	78.02	55.24	143	WP_024566461.1	aminoglycoside 6'-N-acetyltransferase	NF043067.1	aminoglycoside 6'-N-acetyltransferase	1
GCA_025989205.1	Chitinophaga nivalis	MCW3488067.1	blaOXA	class D beta-lactamase	core	AMR	AMR	BETA-LACTAM	BETA-LACTAM	HMM	262	289	83.04	41.13	248	WP_075071939.1	class D beta-lactamase	NF012161.0	class D beta-lactamase	1
GCA_026129565.1	Chitinophagaceae bacterium	MCW5905577.1	lnu(H)	lincosamide nucleotidyltransferase Lnu(H)	core	AMR	AMR	LINCOSAMIDE	LINCOSAMIDE	EXACTP	260	260	100	100	260	WP_051021433.1	lincosamide nucleotidyltransferase Lnu(H)	NF040958.1	lincosamide nucleotidyltransferase Lnu(H)	1
GCA_026129565.1	Chitinophagaceae bacterium	MCW5905721.1	blaOXA	class D beta-lactamase	core	AMR	AMR	BETA-LACTAM	BETA-LACTAM	HMM	269	258	96.51	40.31	258	WP_004919358.1	class D beta-lactamase	NF012161.0	class D beta-lactamase	1
GCA_026129645.1	Chitinophagaceae bacterium	MCW5914909.1	tet(X2)	tetracycline-inactivating monooxygenase Tet(X2)	core	AMR	AMR	TETRACYCLINE	TIGECYCLINE	BLASTP	388	388	100	94.59	388	WP_008651082.1	tetracycline-inactivating monooxygenase Tet(X2)	NF033111.2	tetracycline-inactivating monooxygenase Tet(X)	1
GCA_026129645.1	Chitinophagaceae bacterium	MCW5914922.1	tet(X5)	tetracycline-inactivating monooxygenase Tet(X5)	core	AMR	AMR	TETRACYCLINE	TIGECYCLINE	BLASTP	388	388	100	93.04	388	WP_150378267.1	tetracycline-inactivating monooxygenase Tet(X5)	NF033111.2	tetracycline-inactivating monooxygenase Tet(X)	1
GCA_026129645.1	Chitinophagaceae bacterium	MCW5914923.1	aadS	aminoglycoside 6-adenylyltransferase AadS	core	AMR	AMR	AMINOGLYCOSIDE	STREPTOMYCIN	EXACTP	287	287	100	100	287	WP_003013318.1	aminoglycoside 6-adenylyltransferase AadS	NF033387.1	AadS family aminoglycoside 6-adenylyltransferase	1
GCA_026129575.1	Chitinophagaceae bacterium	MCW5927368.1	bla	subclass B3 metallo-beta-lactamase	core	AMR	AMR	BETA-LACTAM	BETA-LACTAM	HMM	285	290	96.21	60.42	283	WP_063857696.1	subclass B3 metallo-beta-lactamase	NF033105.1	subclass B3 metallo-beta-lactamase	1
GCA_026129575.1	Chitinophagaceae bacterium	MCW5928476.1	aac(6')	aminoglycoside 6'-N-acetyltransferase	core	AMR	AMR	AMINOGLYCOSIDE	AMINOGLYCOSIDE	HMM	150	146	99.32	39.19	148	WP_005202238.1	aminoglycoside 6'-N-acetyltransferase	NF043067.1	aminoglycoside 6'-N-acetyltransferase	1
GCA_026129575.1	Chitinophagaceae bacterium	MCW5928678.1	arr	NAD(+)--rifampin ADP-ribosyltransferase	core	AMR	AMR	RIFAMYCIN	RIFAMYCIN	HMM	119	143	83.22	55.46	119	WP_063842202.1	NAD(+)--rifampin ADP-ribosyltransferase	NF033144.1	NAD(+)--rifampin ADP-ribosyltransferase	1
GCA_026129575.1	Chitinophagaceae bacterium	MCW5929180.1	blaOXA	class D beta-lactamase	core	AMR	AMR	BETA-LACTAM	BETA-LACTAM	HMM	265	258	97.29	38.13	257	WP_004919358.1	class D beta-lactamase	NF012161.0	class D beta-lactamase	1
GCA_026785465.1	Ferruginibacter sp.	MCY7292275.1	blaOXA	class D beta-lactamase	core	AMR	AMR	BETA-LACTAM	BETA-LACTAM	HMM	275	274	97.81	39.05	274	WP_014053563.1	class D beta-lactamase	NF012161.0	class D beta-lactamase	1
GCA_027854065.1	Polluticaenibacter yanchengensis	MDA3616253.1	bla	subclass B1 metallo-beta-lactamase	core	AMR	AMR	BETA-LACTAM	BETA-LACTAM	HMM	252	253	97.23	67.48	246	WP_119059468.1	subclass B1 metallo-beta-lactamase	NF033088.2	subclass B1 metallo-beta-lactamase	1
GCA_028288565.1	Flaviaesturariibacter sp.	MDB5196948.1	arr	NAD(+)--rifampin ADP-ribosyltransferase	core	AMR	AMR	RIFAMYCIN	RIFAMYCIN	HMM	152	143	93.71	49.25	134	WP_063842202.1	NAD(+)--rifampin ADP-ribosyltransferase	NF033144.1	NAD(+)--rifampin ADP-ribosyltransferase	1
GCA_028288665.1	Chitinophagaceae bacterium	MDB5198140.1	blaOXA	class D beta-lactamase	core	AMR	AMR	BETA-LACTAM	BETA-LACTAM	HMM	271	263	96.2	39.69	257	WP_063864080.1	class D beta-lactamase	NF012161.0	class D beta-lactamase	1
GCA_028288705.1	Ferruginibacter sp.	MDB5200698.1	bla	BlaB/IND/MUS family subclass B1 metallo-beta-lactamase	core	AMR	AMR	BETA-LACTAM	BETA-LACTAM	HMM	242	246	93.9	54.55	231	WP_318245543.1	BlaB/IND/MUS family subclass B1 metallo-beta-lactamase	NF012146.1	BlaB/IND/MUS family subclass B1 metallo-beta-lactamase	1
GCA_028288705.1	Ferruginibacter sp.	MDB5201879.1	blaOXA	class D beta-lactamase	core	AMR	AMR	BETA-LACTAM	BETA-LACTAM	HMM	272	275	100	37.46	283	WP_231869629.1	class D beta-lactamase	NF012161.0	class D beta-lactamase	1
GCA_028288705.1	Ferruginibacter sp.	MDB5202707.1	arr	NAD(+)--rifampin ADP-ribosyltransferase	core	AMR	AMR	RIFAMYCIN	RIFAMYCIN	HMM	146	150	88.67	54.14	133	WP_052238312.1	NAD(+)--rifampin ADP-ribosyltransferase	NF033144.1	NAD(+)--rifampin ADP-ribosyltransferase	1
GCA_028288675.1	Flavisolibacter sp.	MDB5205013.1	bla	subclass B3 metallo-beta-lactamase	core	AMR	AMR	BETA-LACTAM	BETA-LACTAM	HMM	290	293	94.88	64.52	279	WP_063842707.1	subclass B3 metallo-beta-lactamase	NF033105.1	subclass B3 metallo-beta-lactamase	1
GCA_028288645.1	Sediminibacterium sp.	MDB5209963.1	blaOXA	class D beta-lactamase	core	AMR	AMR	BETA-LACTAM	BETA-LACTAM	HMM	283	258	100	37.77	278	WP_004919358.1	class D beta-lactamase	NF012161.0	class D beta-lactamase	2
GCA_028288585.1	Chitinophagaceae bacterium	MDB5224201.1	blaOXA	class D beta-lactamase	core	AMR	AMR	BETA-LACTAM	BETA-LACTAM	HMM	271	263	96.2	40.08	257	WP_063864080.1	class D beta-lactamase	NF012161.0	class D beta-lactamase	2
GCA_028288595.1	Chitinophagaceae bacterium	MDB5231642.1	bla	BlaB/IND/MUS family subclass B1 metallo-beta-lactamase	core	AMR	AMR	BETA-LACTAM	BETA-LACTAM	HMM	232	241	93.36	56.64	226	WP_148044405.1	BlaB/IND/MUS family subclass B1 metallo-beta-lactamase	NF012146.1	BlaB/IND/MUS family subclass B1 metallo-beta-lactamase	1
GCA_028288595.1	Chitinophagaceae bacterium	MDB5232818.1	blaOXA	class D beta-lactamase	core	AMR	AMR	BETA-LACTAM	BETA-LACTAM	HMM	270	284	97.18	37.01	281	WP_004650739.1	class D beta-lactamase	NF012161.0	class D beta-lactamase	2
GCA_028288405.1	Chitinophagaceae bacterium	MDB5256757.1	arr	NAD(+)--rifampin ADP-ribosyltransferase	core	AMR	AMR	RIFAMYCIN	RIFAMYCIN	HMM	247	150	85.33	52.34	128	WP_033959319.1	NAD(+)--rifampin ADP-ribosyltransferase	NF033144.1	NAD(+)--rifampin ADP-ribosyltransferase	2
GCA_028288365.1	Chitinophagaceae bacterium	MDB5271849.1	arr	NAD(+)--rifampin ADP-ribosyltransferase	core	AMR	AMR	RIFAMYCIN	RIFAMYCIN	HMM	146	137	96.35	57.58	132	WP_012695486.1	NAD(+)--rifampin ADP-ribosyltransferase	NF033144.1	NAD(+)--rifampin ADP-ribosyltransferase	1
GCA_028288465.1	Ferruginibacter sp.	MDB5275050.1	blaOXA	class D beta-lactamase	core	AMR	AMR	BETA-LACTAM	BETA-LACTAM	HMM	274	258	97.67	39.46	261	WP_004919358.1	class D beta-lactamase	NF012161.0	class D beta-lactamase	1
GCA_028288465.1	Ferruginibacter sp.	MDB5279040.1	bla	subclass B3 metallo-beta-lactamase	core	AMR	AMR	BETA-LACTAM	BETA-LACTAM	HMM	290	289	99.65	66.32	288	WP_041884311.1	subclass B3 metallo-beta-lactamase	NF033105.1	subclass B3 metallo-beta-lactamase	1
GCA_028288465.1	Ferruginibacter sp.	MDB5280233.1	arr	NAD(+)--rifampin ADP-ribosyltransferase	core	AMR	AMR	RIFAMYCIN	RIFAMYCIN	HMM	247	150	83.33	52.8	125	WP_052238312.1	NAD(+)--rifampin ADP-ribosyltransferase	NF033144.1	NAD(+)--rifampin ADP-ribosyltransferase	1
GCA_029223285.1	Paraflavitalea sp. CAU 1676	MDF2189428.1	bla	BlaB/IND/MUS family subclass B1 metallo-beta-lactamase	core	AMR	AMR	BETA-LACTAM	BETA-LACTAM	HMM	245	248	95.56	55.04	238	WP_012025466.1	BlaB/IND/MUS family subclass B1 metallo-beta-lactamase	NF012146.1	BlaB/IND/MUS family subclass B1 metallo-beta-lactamase	1
GCA_029223285.1	Paraflavitalea sp. CAU 1676	MDF2193159.1	arsN2	arsenic resistance N-acetyltransferase ArsN2	plus	STRESS	METAL	ARSENIC	ARSENIC	HMM	142	164	84.15	39.86	138	ABU58394.1	arsenic resistance N-acetyltransferase ArsN2	NF040501.1	arsenic resistance N-acetyltransferase ArsN2	1
GCA_029223285.1	Paraflavitalea sp. CAU 1676	MDF2193474.1	arr	NAD(+)--rifampin ADP-ribosyltransferase	core	AMR	AMR	RIFAMYCIN	RIFAMYCIN	HMM	143	150	90.67	57.35	136	WP_052238312.1	NAD(+)--rifampin ADP-ribosyltransferase	NF033144.1	NAD(+)--rifampin ADP-ribosyltransferase	1
GCA_029906195.1	Chitinophagaceae bacterium 26-R-25	MDH7460075.1	arr	NAD(+)--rifampin ADP-ribosyltransferase	core	AMR	AMR	RIFAMYCIN	RIFAMYCIN	HMM	146	143	96.5	55	140	WP_063842202.1	NAD(+)--rifampin ADP-ribosyltransferase	NF033144.1	NAD(+)--rifampin ADP-ribosyltransferase	1
GCA_029906195.1	Chitinophagaceae bacterium 26-R-25	MDH7460346.1	bla	BlaB/IND/MUS family subclass B1 metallo-beta-lactamase	core	AMR	AMR	BETA-LACTAM	BETA-LACTAM	HMM	246	237	97.05	52.16	232	WP_063864592.1	BlaB/IND/MUS family subclass B1 metallo-beta-lactamase	NF012146.1	BlaB/IND/MUS family subclass B1 metallo-beta-lactamase	1
GCA_029961145.1	Pinibacter soli	MDI3320799.1	bla	BlaB/IND/MUS family subclass B1 metallo-beta-lactamase	core	AMR	AMR	BETA-LACTAM	BETA-LACTAM	HMM	246	248	100	48.79	248	WP_012025466.1	BlaB/IND/MUS family subclass B1 metallo-beta-lactamase	NF012146.1	BlaB/IND/MUS family subclass B1 metallo-beta-lactamase	1
GCA_029961145.1	Pinibacter soli	MDI3321261.1	arr	NAD(+)--rifampin ADP-ribosyltransferase	core	AMR	AMR	RIFAMYCIN	RIFAMYCIN	HMM	146	137	96.35	57.58	132	WP_012695486.1	NAD(+)--rifampin ADP-ribosyltransferase	NF033144.1	NAD(+)--rifampin ADP-ribosyltransferase	1
GCA_030054095.1	Sediminibacterium sp.	MDI9341838.1	aac(6')	aminoglycoside 6'-N-acetyltransferase	core	AMR	AMR	AMINOGLYCOSIDE	AMINOGLYCOSIDE	HMM	149	182	79.12	53.47	144	WP_024566461.1	aminoglycoside 6'-N-acetyltransferase	NF043067.1	aminoglycoside 6'-N-acetyltransferase	1
GCA_030054095.1	Sediminibacterium sp.	MDI9342166.1	bla	subclass B1 metallo-beta-lactamase	core	AMR	AMR	BETA-LACTAM	BETA-LACTAM	HMM	253	253	98.02	66.27	249	WP_119059468.1	subclass B1 metallo-beta-lactamase	NF033088.2	subclass B1 metallo-beta-lactamase	2
GCA_030053935.1	Chitinophagaceae bacterium	MDI9357114.1	arsN2	arsenic resistance N-acetyltransferase ArsN2	plus	STRESS	METAL	ARSENIC	ARSENIC	HMM	151	142	97.18	31.16	138	ABB05616.1	arsenic resistance N-acetyltransferase ArsN2	NF040501.1	arsenic resistance N-acetyltransferase ArsN2	2
GCA_030409685.1	Ferruginibacter paludis	MDN3657356.1	arr	NAD(+)--rifampin ADP-ribosyltransferase	core	AMR	AMR	RIFAMYCIN	RIFAMYCIN	HMM	247	150	83.33	52.8	125	WP_052238312.1	NAD(+)--rifampin ADP-ribosyltransferase	NF033144.1	NAD(+)--rifampin ADP-ribosyltransferase	1
GCA_030409685.1	Ferruginibacter paludis	MDN3658150.1	bla	subclass B3 metallo-beta-lactamase	core	AMR	AMR	BETA-LACTAM	BETA-LACTAM	HMM	290	289	96.89	68.57	280	WP_041884311.1	subclass B3 metallo-beta-lactamase	NF033105.1	subclass B3 metallo-beta-lactamase	2
GCA_030409685.1	Ferruginibacter paludis	MDN3658492.1	blaOXA	class D beta-lactamase	core	AMR	AMR	BETA-LACTAM	BETA-LACTAM	HMM	274	258	97.67	39.08	261	WP_004919358.1	class D beta-lactamase	NF012161.0	class D beta-lactamase	2
GCA_030546645.1	Flavitalea sp. BT771	MDO6432699.1	bla	subclass B3 metallo-beta-lactamase	core	AMR	AMR	BETA-LACTAM	BETA-LACTAM	HMM	293	289	98.27	59.15	284	WP_041884311.1	subclass B3 metallo-beta-lactamase	NF033105.1	subclass B3 metallo-beta-lactamase	2
GCA_030652525.1	Sediminibacterium sp.	MDO8998015.1	bla	BlaB/IND/MUS family subclass B1 metallo-beta-lactamase	core	AMR	AMR	BETA-LACTAM	BETA-LACTAM	HMM	344	246	96.34	51.68	238	WP_318245543.1	BlaB/IND/MUS family subclass B1 metallo-beta-lactamase	NF012146.1	BlaB/IND/MUS family subclass B1 metallo-beta-lactamase	2
GCA_030653885.1	Sediminibacterium sp.	MDO9157590.1	bla	BlaB/IND/MUS family subclass B1 metallo-beta-lactamase	core	AMR	AMR	BETA-LACTAM	BETA-LACTAM	HMM	289	246	99.19	50.2	245	WP_318245543.1	BlaB/IND/MUS family subclass B1 metallo-beta-lactamase	NF012146.1	BlaB/IND/MUS family subclass B1 metallo-beta-lactamase	1
GCA_030655145.1	Ferruginibacter sp.	MDO9375195.1	bla	BlaB/IND/MUS family subclass B1 metallo-beta-lactamase	core	AMR	AMR	BETA-LACTAM	BETA-LACTAM	HMM	240	241	97.1	52.1	238	WP_148044405.1	BlaB/IND/MUS family subclass B1 metallo-beta-lactamase	NF012146.1	BlaB/IND/MUS family subclass B1 metallo-beta-lactamase	1
GCA_030685185.1	Sediminibacterium sp.	MDP2420606.1	bla	BlaB/IND/MUS family subclass B1 metallo-beta-lactamase	core	AMR	AMR	BETA-LACTAM	BETA-LACTAM	HMM	344	246	99.19	50.2	245	WP_318245543.1	BlaB/IND/MUS family subclass B1 metallo-beta-lactamase	NF012146.1	BlaB/IND/MUS family subclass B1 metallo-beta-lactamase	1
GCA_030695065.1	Sediminibacterium sp.	MDP3392993.1	bla	BlaB/IND/MUS family subclass B1 metallo-beta-lactamase	core	AMR	AMR	BETA-LACTAM	BETA-LACTAM	HMM	344	241	98.34	50.84	238	WP_148044405.1	BlaB/IND/MUS family subclass B1 metallo-beta-lactamase	NF012146.1	BlaB/IND/MUS family subclass B1 metallo-beta-lactamase	1
GCA_030696705.1	Sediminibacterium sp.	MDP3567199.1	bla	BlaB/IND/MUS family subclass B1 metallo-beta-lactamase	core	AMR	AMR	BETA-LACTAM	BETA-LACTAM	HMM	344	241	98.34	50.84	238	WP_148044405.1	BlaB/IND/MUS family subclass B1 metallo-beta-lactamase	NF012146.1	BlaB/IND/MUS family subclass B1 metallo-beta-lactamase	1
GCA_030812325.1	Chitinophaga terrae (ex Kim and Jung 2007)	MDQ0107220.1	bla	class A beta-lactamase, subclass A2	core	AMR	AMR	BETA-LACTAM	BETA-LACTAM	HMM	299	301	98.67	46.46	297	WP_032494759.1	class A beta-lactamase, subclass A2	NF012099.1	class A beta-lactamase, subclass A2	2
GCA_030812325.1	Chitinophaga terrae (ex Kim and Jung 2007)	MDQ0109623.1	bla	subclass B3 metallo-beta-lactamase	core	AMR	AMR	BETA-LACTAM	BETA-LACTAM	HMM	287	289	97.92	64.31	283	WP_041884311.1	subclass B3 metallo-beta-lactamase	NF033105.1	subclass B3 metallo-beta-lactamase	2
GCA_030812325.1	Chitinophaga terrae (ex Kim and Jung 2007)	MDQ0109837.1	aadS	AadS family aminoglycoside 6-adenylyltransferase	core	AMR	AMR	AMINOGLYCOSIDE	STREPTOMYCIN	HMM	296	287	97.56	61.79	280	WP_003013318.1	AadS family aminoglycoside 6-adenylyltransferase	NF033387.1	AadS family aminoglycoside 6-adenylyltransferase	1
GCA_031260445.1	Chitinophagaceae bacterium	MDR0791930.1	blaOXA	class D beta-lactamase	core	AMR	AMR	BETA-LACTAM	BETA-LACTAM	HMM	267	258	94.57	41.43	251	WP_004919358.1	class D beta-lactamase	NF012161.0	class D beta-lactamase	1
GCA_031292525.1	Flavipsychrobacter sp.	MDR3682068.1	fosX	FosX/FosE/FosI family fosfomycin resistance hydrolase	core	AMR	AMR	FOSFOMYCIN	FOSFOMYCIN	HMM	139	136	97.06	56.39	133	WP_024725385.1	FosX/FosE/FosI family fosfomycin resistance hydrolase	NF000222.1	FosX/FosE/FosI family fosfomycin resistance hydrolase	2
GCA_031292515.1	Puia sp.	MDR3711287.1	bla	class A beta-lactamase	core	AMR	AMR	BETA-LACTAM	BETA-LACTAM	HMM	314	303	89.77	46.32	272	WP_041881964.1	class A beta-lactamase	NF033103.1	class A beta-lactamase	2
GCA_031292515.1	Puia sp.	MDR3711946.1	bla	subclass B3 metallo-beta-lactamase	core	AMR	AMR	BETA-LACTAM	BETA-LACTAM	HMM	319	289	97.92	61.84	283	WP_041884311.1	subclass B3 metallo-beta-lactamase	NF033105.1	subclass B3 metallo-beta-lactamase	2
GCA_031292515.1	Puia sp.	MDR3712633.1	arr	NAD(+)--rifampin ADP-ribosyltransferase	core	AMR	AMR	RIFAMYCIN	RIFAMYCIN	HMM	147	137	98.54	57.04	135	WP_012695486.1	NAD(+)--rifampin ADP-ribosyltransferase	NF033144.1	NAD(+)--rifampin ADP-ribosyltransferase	2
GCA_031454095.1	Filimonas zeae	MDR6340058.1	bla	subclass B3 metallo-beta-lactamase	core	AMR	AMR	BETA-LACTAM	BETA-LACTAM	HMM	295	293	97.61	62.24	286	WP_063842707.1	subclass B3 metallo-beta-lactamase	NF033105.1	subclass B3 metallo-beta-lactamase	1
GCA_031454975.1	Chitinophaga ginsengisegetis	MDR6566381.1	blaOXA	class D beta-lactamase	core	AMR	AMR	BETA-LACTAM	BETA-LACTAM	HMM	269	266	96.62	37.4	262	WP_032490445.1	class D beta-lactamase	NF012161.0	class D beta-lactamase	3
GCA_031454975.1	Chitinophaga ginsengisegetis	MDR6568216.1	aadS	AadS family aminoglycoside 6-adenylyltransferase	core	AMR	AMR	AMINOGLYCOSIDE	STREPTOMYCIN	HMM	291	287	99.65	63.99	286	WP_003013318.1	AadS family aminoglycoside 6-adenylyltransferase	NF033387.1	AadS family aminoglycoside 6-adenylyltransferase	3
GCA_031454975.1	Chitinophaga ginsengisegetis	MDR6569135.1	bla	subclass B1 metallo-beta-lactamase	core	AMR	AMR	BETA-LACTAM	BETA-LACTAM	HMM	252	253	100	73.91	253	WP_119059468.1	subclass B1 metallo-beta-lactamase	NF033088.2	subclass B1 metallo-beta-lactamase	3
GCA_031454975.1	Chitinophaga ginsengisegetis	MDR6569188.1	bla	class A beta-lactamase	core	AMR	AMR	BETA-LACTAM	BETA-LACTAM	HMM	299	319	86.52	47.29	277	WP_063842272.1	class A beta-lactamase	NF033103.1	class A beta-lactamase	2
GCA_031454975.1	Chitinophaga ginsengisegetis	MDR6570128.1	arr	NAD(+)--rifampin ADP-ribosyltransferase	core	AMR	AMR	RIFAMYCIN	RIFAMYCIN	HMM	143	143	89.51	60.16	128	WP_063842202.1	NAD(+)--rifampin ADP-ribosyltransferase	NF033144.1	NAD(+)--rifampin ADP-ribosyltransferase	2
GCA_031454975.1	Chitinophaga ginsengisegetis	MDR6570861.1	bla	BlaB/IND/MUS family subclass B1 metallo-beta-lactamase	core	AMR	AMR	BETA-LACTAM	BETA-LACTAM	HMM	241	237	99.16	45.64	241	WP_063864592.1	BlaB/IND/MUS family subclass B1 metallo-beta-lactamase	NF012146.1	BlaB/IND/MUS family subclass B1 metallo-beta-lactamase	2
GCA_031455045.1	Chitinophaga ginsengisegetis	MDR6646111.1	blaOXA	class D beta-lactamase	core	AMR	AMR	BETA-LACTAM	BETA-LACTAM	HMM	269	266	96.62	37.4	262	WP_032490445.1	class D beta-lactamase	NF012161.0	class D beta-lactamase	2
GCA_031455045.1	Chitinophaga ginsengisegetis	MDR6648553.1	aadS	AadS family aminoglycoside 6-adenylyltransferase	core	AMR	AMR	AMINOGLYCOSIDE	STREPTOMYCIN	HMM	291	287	99.65	63.99	286	WP_003013318.1	AadS family aminoglycoside 6-adenylyltransferase	NF033387.1	AadS family aminoglycoside 6-adenylyltransferase	6
GCA_031455045.1	Chitinophaga ginsengisegetis	MDR6648782.1	bla	class A beta-lactamase	core	AMR	AMR	BETA-LACTAM	BETA-LACTAM	HMM	299	319	86.52	47.29	277	WP_063842272.1	class A beta-lactamase	NF033103.1	class A beta-lactamase	6
GCA_031455045.1	Chitinophaga ginsengisegetis	MDR6648836.1	bla	subclass B1 metallo-beta-lactamase	core	AMR	AMR	BETA-LACTAM	BETA-LACTAM	HMM	252	253	100	73.91	253	WP_119059468.1	subclass B1 metallo-beta-lactamase	NF033088.2	subclass B1 metallo-beta-lactamase	6
GCA_031455045.1	Chitinophaga ginsengisegetis	MDR6649862.1	arr	NAD(+)--rifampin ADP-ribosyltransferase	core	AMR	AMR	RIFAMYCIN	RIFAMYCIN	HMM	143	143	89.51	60.16	128	WP_063842202.1	NAD(+)--rifampin ADP-ribosyltransferase	NF033144.1	NAD(+)--rifampin ADP-ribosyltransferase	6
GCA_031455045.1	Chitinophaga ginsengisegetis	MDR6650595.1	bla	BlaB/IND/MUS family subclass B1 metallo-beta-lactamase	core	AMR	AMR	BETA-LACTAM	BETA-LACTAM	HMM	241	237	99.16	45.64	241	WP_063864592.1	BlaB/IND/MUS family subclass B1 metallo-beta-lactamase	NF012146.1	BlaB/IND/MUS family subclass B1 metallo-beta-lactamase	6
GCA_031455015.1	Chitinophaga ginsengisegetis	MDR6651297.1	blaOXA	class D beta-lactamase	core	AMR	AMR	BETA-LACTAM	BETA-LACTAM	HMM	269	266	96.62	37.4	262	WP_032490445.1	class D beta-lactamase	NF012161.0	class D beta-lactamase	6
GCA_031455015.1	Chitinophaga ginsengisegetis	MDR6654297.1	aadS	AadS family aminoglycoside 6-adenylyltransferase	core	AMR	AMR	AMINOGLYCOSIDE	STREPTOMYCIN	HMM	291	287	99.65	63.99	286	WP_003013318.1	AadS family aminoglycoside 6-adenylyltransferase	NF033387.1	AadS family aminoglycoside 6-adenylyltransferase	2
GCA_031455015.1	Chitinophaga ginsengisegetis	MDR6655216.1	bla	subclass B1 metallo-beta-lactamase	core	AMR	AMR	BETA-LACTAM	BETA-LACTAM	HMM	252	253	100	73.91	253	WP_119059468.1	subclass B1 metallo-beta-lactamase	NF033088.2	subclass B1 metallo-beta-lactamase	2
GCA_031455015.1	Chitinophaga ginsengisegetis	MDR6655270.1	bla	class A beta-lactamase	core	AMR	AMR	BETA-LACTAM	BETA-LACTAM	HMM	299	319	86.52	47.29	277	WP_063842272.1	class A beta-lactamase	NF033103.1	class A beta-lactamase	2
GCA_031455015.1	Chitinophaga ginsengisegetis	MDR6655935.1	arr	NAD(+)--rifampin ADP-ribosyltransferase	core	AMR	AMR	RIFAMYCIN	RIFAMYCIN	HMM	143	143	89.51	60.16	128	WP_063842202.1	NAD(+)--rifampin ADP-ribosyltransferase	NF033144.1	NAD(+)--rifampin ADP-ribosyltransferase	2
GCA_031455015.1	Chitinophaga ginsengisegetis	MDR6656766.1	bla	BlaB/IND/MUS family subclass B1 metallo-beta-lactamase	core	AMR	AMR	BETA-LACTAM	BETA-LACTAM	HMM	241	237	99.16	45.64	241	WP_063864592.1	BlaB/IND/MUS family subclass B1 metallo-beta-lactamase	NF012146.1	BlaB/IND/MUS family subclass B1 metallo-beta-lactamase	2
GCA_033042515.1	Flavitalea sp. BT771	MDV6222025.1	bla	subclass B3 metallo-beta-lactamase	core	AMR	AMR	BETA-LACTAM	BETA-LACTAM	HMM	293	289	98.27	59.15	284	WP_041884311.1	subclass B3 metallo-beta-lactamase	NF033105.1	subclass B3 metallo-beta-lactamase	2
GCA_033761915.1	Flavihumibacter sp.	MDX1938723.1	arsN2	arsenic resistance N-acetyltransferase ArsN2	plus	STRESS	METAL	ARSENIC	ARSENIC	HMM	144	144	97.22	36.17	141	KTT96020.1	arsenic resistance N-acetyltransferase ArsN2	NF040501.1	arsenic resistance N-acetyltransferase ArsN2	1
GCA_033761915.1	Flavihumibacter sp.	MDX1938750.1	bla	BlaB/IND/MUS family subclass B1 metallo-beta-lactamase	core	AMR	AMR	BETA-LACTAM	BETA-LACTAM	HMM	245	241	100	50	242	WP_148044405.1	BlaB/IND/MUS family subclass B1 metallo-beta-lactamase	NF012146.1	BlaB/IND/MUS family subclass B1 metallo-beta-lactamase	1
GCA_033763355.1	Chitinophagaceae bacterium	MDX2045978.1	arsN2	arsenic resistance N-acetyltransferase ArsN2	plus	STRESS	METAL	ARSENIC	ARSENIC	HMM	146	147	96.6	35.21	142	ABG05788.1	arsenic resistance N-acetyltransferase ArsN2	NF040501.1	arsenic resistance N-acetyltransferase ArsN2	1
GCA_033763355.1	Chitinophagaceae bacterium	MDX2046220.1	arr	NAD(+)--rifampin ADP-ribosyltransferase	core	AMR	AMR	RIFAMYCIN	RIFAMYCIN	HMM	148	137	92.7	57.48	127	WP_012695486.1	NAD(+)--rifampin ADP-ribosyltransferase	NF033144.1	NAD(+)--rifampin ADP-ribosyltransferase	3
GCA_033763355.1	Chitinophagaceae bacterium	MDX2048098.1	bla	BlaB/IND/MUS family subclass B1 metallo-beta-lactamase	core	AMR	AMR	BETA-LACTAM	BETA-LACTAM	HMM	243	246	97.97	57.02	242	WP_318245543.1	BlaB/IND/MUS family subclass B1 metallo-beta-lactamase	NF012146.1	BlaB/IND/MUS family subclass B1 metallo-beta-lactamase	3
GCA_033763355.1	Chitinophagaceae bacterium	MDX2048760.1	blaOXA	class D beta-lactamase	core	AMR	AMR	BETA-LACTAM	BETA-LACTAM	HMM	273	268	98.51	37.09	275	WP_003328240.1	class D beta-lactamase	NF012161.0	class D beta-lactamase	3
GCA_034366725.1	Sediminibacterium sp.	MDZ4072637.1	aac(6')	aminoglycoside 6'-N-acetyltransferase	core	AMR	AMR	AMINOGLYCOSIDE	AMINOGLYCOSIDE	HMM	151	182	78.02	42.96	142	WP_024566461.1	aminoglycoside 6'-N-acetyltransferase	NF043067.1	aminoglycoside 6'-N-acetyltransferase	1
GCA_034366725.1	Sediminibacterium sp.	MDZ4072872.1	bla	BlaB/IND/MUS family subclass B1 metallo-beta-lactamase	core	AMR	AMR	BETA-LACTAM	BETA-LACTAM	HMM	244	248	98.39	50	244	WP_012025466.1	BlaB/IND/MUS family subclass B1 metallo-beta-lactamase	NF012146.1	BlaB/IND/MUS family subclass B1 metallo-beta-lactamase	1
GCA_035969465.1	Chitinophaga sp. 212800010-3	MEC5145762.1	bla	subclass B3 metallo-beta-lactamase	core	AMR	AMR	BETA-LACTAM	BETA-LACTAM	HMM	290	289	91.7	62.26	265	WP_041884311.1	subclass B3 metallo-beta-lactamase	NF033105.1	subclass B3 metallo-beta-lactamase	4
GCA_035969465.1	Chitinophaga sp. 212800010-3	MEC5146004.1	bla	class A beta-lactamase	core	AMR	AMR	BETA-LACTAM	BETA-LACTAM	HMM	300	319	96.55	44.69	311	WP_063842272.1	class A beta-lactamase	NF033103.1	class A beta-lactamase	4
GCA_035969465.1	Chitinophaga sp. 212800010-3	MEC5147613.1	blaOXA	class D beta-lactamase	core	AMR	AMR	BETA-LACTAM	BETA-LACTAM	HMM	268	258	91.86	39.84	246	WP_004919358.1	class D beta-lactamase	NF012161.0	class D beta-lactamase	4
GCA_036409055.1	Niabella digestorum	MEE6186697.1	lnu(H)	lincosamide nucleotidyltransferase Lnu(H)	core	AMR	AMR	LINCOSAMIDE	LINCOSAMIDE	BLASTP	263	260	100	100	260	WP_051021433.1	lincosamide nucleotidyltransferase Lnu(H)	NF040958.1	lincosamide nucleotidyltransferase Lnu(H)	4
GCA_036409055.1	Niabella digestorum	MEE6187899.1	arr	NAD(+)--rifampin ADP-ribosyltransferase	core	AMR	AMR	RIFAMYCIN	RIFAMYCIN	HMM	247	150	83.33	49.6	125	WP_052238312.1	NAD(+)--rifampin ADP-ribosyltransferase	NF033144.1	NAD(+)--rifampin ADP-ribosyltransferase	1
GCA_036409055.1	Niabella digestorum	MEE6188002.1	erm	23S ribosomal RNA methyltransferase Erm	core	AMR	AMR	MACROLIDE	MACROLIDE	HMM	267	266	99.62	65.41	266	WP_002682030.1	23S ribosomal RNA methyltransferase Erm	NF000499.2	23S ribosomal RNA methyltransferase Erm	2
GCA_036409055.1	Niabella digestorum	MEE6188028.1	catB	type B chloramphenicol O-acetyltransferase	core	AMR	AMR	PHENICOL	CHLORAMPHENICOL	HMM	209	210	97.62	73.66	205	WP_071846350.1	type B chloramphenicol O-acetyltransferase	NF000490.1	type B chloramphenicol O-acetyltransferase	2
GCA_036409055.1	Niabella digestorum	MEE6188350.1	qnrS2	quinolone resistance pentapeptide repeat protein QnrS2	core	AMR	AMR	QUINOLONE	QUINOLONE	ALLELEP	218	218	100	100	218	WP_012537714.1	quinolone resistance pentapeptide repeat protein QnrS2	NF000056.3	QnrS family quinolone resistance pentapeptide repeat protein	1
GCA_037045665.1	Chitinophagaceae bacterium	MEI2673032.1	arsN2	arsenic resistance N-acetyltransferase ArsN2	plus	STRESS	METAL	ARSENIC	ARSENIC	HMM	146	147	94.56	37.41	139	ABG05788.1	arsenic resistance N-acetyltransferase ArsN2	NF040501.1	arsenic resistance N-acetyltransferase ArsN2	1
GCA_037045665.1	Chitinophagaceae bacterium	MEI2673148.1	arr	NAD(+)--rifampin ADP-ribosyltransferase	core	AMR	AMR	RIFAMYCIN	RIFAMYCIN	HMM	142	150	87.33	57.25	131	WP_033959319.1	NAD(+)--rifampin ADP-ribosyltransferase	NF033144.1	NAD(+)--rifampin ADP-ribosyltransferase	3
GCA_037045515.1	Chitinophagaceae bacterium	MEI2707442.1	bla	BlaB/IND/MUS family subclass B1 metallo-beta-lactamase	core	AMR	AMR	BETA-LACTAM	BETA-LACTAM	HMM	239	248	95.97	55.88	238	WP_012025466.1	BlaB/IND/MUS family subclass B1 metallo-beta-lactamase	NF012146.1	BlaB/IND/MUS family subclass B1 metallo-beta-lactamase	3
GCA_037045605.1	Chitinophagaceae bacterium	MEI2738721.1	bla	BlaB/IND/MUS family subclass B1 metallo-beta-lactamase	core	AMR	AMR	BETA-LACTAM	BETA-LACTAM	HMM	245	241	100	54.96	242	WP_148044405.1	BlaB/IND/MUS family subclass B1 metallo-beta-lactamase	NF012146.1	BlaB/IND/MUS family subclass B1 metallo-beta-lactamase	3
GCA_037045295.1	Ferruginibacter sp.	MEI2747781.1	blaOXA	class D beta-lactamase	core	AMR	AMR	BETA-LACTAM	BETA-LACTAM	HMM	276	274	99.27	36.69	278	WP_242934095.1	class D beta-lactamase	NF012161.0	class D beta-lactamase	4
GCA_037045195.1	Chitinophagaceae bacterium	MEI2757043.1	bla	BlaB/IND/MUS family subclass B1 metallo-beta-lactamase	core	AMR	AMR	BETA-LACTAM	BETA-LACTAM	HMM	245	246	98.78	54.51	244	WP_318245543.1	BlaB/IND/MUS family subclass B1 metallo-beta-lactamase	NF012146.1	BlaB/IND/MUS family subclass B1 metallo-beta-lactamase	4
GCA_037046685.1	Chitinophagaceae bacterium	MEI2823797.1	bla	BlaB/IND/MUS family subclass B1 metallo-beta-lactamase	core	AMR	AMR	BETA-LACTAM	BETA-LACTAM	HMM	245	241	97.93	54.17	240	WP_148044405.1	BlaB/IND/MUS family subclass B1 metallo-beta-lactamase	NF012146.1	BlaB/IND/MUS family subclass B1 metallo-beta-lactamase	4
GCA_037046685.1	Chitinophagaceae bacterium	MEI2823851.1	aadS	AadS family aminoglycoside 6-adenylyltransferase	core	AMR	AMR	AMINOGLYCOSIDE	STREPTOMYCIN	HMM	286	287	99.65	67.83	286	WP_003013318.1	AadS family aminoglycoside 6-adenylyltransferase	NF033387.1	AadS family aminoglycoside 6-adenylyltransferase	4
GCA_037046685.1	Chitinophagaceae bacterium	MEI2823860.1	arr	NAD(+)--rifampin ADP-ribosyltransferase	core	AMR	AMR	RIFAMYCIN	RIFAMYCIN	HMM	150	137	93.43	63.28	128	WP_012695486.1	NAD(+)--rifampin ADP-ribosyltransferase	NF033144.1	NAD(+)--rifampin ADP-ribosyltransferase	1
GCA_037046685.1	Chitinophagaceae bacterium	MEI2824291.1	arr	NAD(+)--rifampin ADP-ribosyltransferase	core	AMR	AMR	RIFAMYCIN	RIFAMYCIN	HMM	150	137	93.43	62.5	128	WP_012695486.1	NAD(+)--rifampin ADP-ribosyltransferase	NF033144.1	NAD(+)--rifampin ADP-ribosyltransferase	2
GCA_037083545.1	Chitinophaga sp. CCNWLW40	MEI3797160.1	aadS	AadS family aminoglycoside 6-adenylyltransferase	core	AMR	AMR	AMINOGLYCOSIDE	STREPTOMYCIN	HMM	291	287	99.65	63.99	286	WP_003013318.1	AadS family aminoglycoside 6-adenylyltransferase	NF033387.1	AadS family aminoglycoside 6-adenylyltransferase	2
GCA_037083545.1	Chitinophaga sp. CCNWLW40	MEI3800493.1	bla	subclass B1 metallo-beta-lactamase	core	AMR	AMR	BETA-LACTAM	BETA-LACTAM	HMM	252	253	100	75.1	253	WP_119059468.1	subclass B1 metallo-beta-lactamase	NF033088.2	subclass B1 metallo-beta-lactamase	2
GCA_037083545.1	Chitinophaga sp. CCNWLW40	MEI3800552.1	bla	class A beta-lactamase	core	AMR	AMR	BETA-LACTAM	BETA-LACTAM	HMM	299	319	86.52	47.65	277	WP_063842272.1	class A beta-lactamase	NF033103.1	class A beta-lactamase	2
GCA_037083545.1	Chitinophaga sp. CCNWLW40	MEI3801567.1	blaOXA	class D beta-lactamase	core	AMR	AMR	BETA-LACTAM	BETA-LACTAM	HMM	269	266	96.62	37.4	262	WP_032490445.1	class D beta-lactamase	NF012161.0	class D beta-lactamase	1
GCA_037083545.1	Chitinophaga sp. CCNWLW40	MEI3802501.1	arr	NAD(+)--rifampin ADP-ribosyltransferase	core	AMR	AMR	RIFAMYCIN	RIFAMYCIN	HMM	143	143	89.51	59.38	128	WP_063842202.1	NAD(+)--rifampin ADP-ribosyltransferase	NF033144.1	NAD(+)--rifampin ADP-ribosyltransferase	2
GCA_037083545.1	Chitinophaga sp. CCNWLW40	MEI3802757.1	bla	BlaB/IND/MUS family subclass B1 metallo-beta-lactamase	core	AMR	AMR	BETA-LACTAM	BETA-LACTAM	HMM	241	237	99.16	46.06	241	WP_063864592.1	BlaB/IND/MUS family subclass B1 metallo-beta-lactamase	NF012146.1	BlaB/IND/MUS family subclass B1 metallo-beta-lactamase	2
GCA_037132455.1	Paraflavisolibacter sp. H34	MEI6947551.1	arsN2	arsenic resistance N-acetyltransferase ArsN2	plus	STRESS	METAL	ARSENIC	ARSENIC	HMM	142	164	84.76	38.3	141	ABU58394.1	arsenic resistance N-acetyltransferase ArsN2	NF040501.1	arsenic resistance N-acetyltransferase ArsN2	1
GCA_037140275.1	Ferruginibacter sp.	MEI7734255.1	blaOXA	class D beta-lactamase	core	AMR	AMR	BETA-LACTAM	BETA-LACTAM	HMM	266	258	94.19	42.46	252	WP_004919358.1	class D beta-lactamase	NF012161.0	class D beta-lactamase	2
GCA_037140275.1	Ferruginibacter sp.	MEI7736123.1	bla	subclass B3 metallo-beta-lactamase	core	AMR	AMR	BETA-LACTAM	BETA-LACTAM	HMM	292	289	97.58	66.55	287	WP_041884311.1	subclass B3 metallo-beta-lactamase	NF033105.1	subclass B3 metallo-beta-lactamase	2
GCA_037141955.1	Chitinophagaceae bacterium	MEI7963702.1	blaOXA	class D beta-lactamase	core	AMR	AMR	BETA-LACTAM	BETA-LACTAM	HMM	271	267	93.63	41.25	257	WP_003235647.1	class D beta-lactamase	NF012161.0	class D beta-lactamase	2
GCA_037200685.1	Chitinophagaceae bacterium	MEI9945933.1	arsN1	arsinothricin resistance N-acetyltransferase ArsN1 family B	plus	STRESS	METAL	ARSENIC	ARSENIC	HMM	196	186	92.47	42.44	172	AAN67541.1	arsinothricin resistance N-acetyltransferase ArsN1 family B	NF040504.1	arsinothricin resistance N-acetyltransferase ArsN1 family B	2
GCA_037200685.1	Chitinophagaceae bacterium	MEI9946608.1	arr	NAD(+)--rifampin ADP-ribosyltransferase	core	AMR	AMR	RIFAMYCIN	RIFAMYCIN	HMM	148	150	98.67	52.03	148	WP_033959319.1	NAD(+)--rifampin ADP-ribosyltransferase	NF033144.1	NAD(+)--rifampin ADP-ribosyltransferase	1
GCA_037200725.1	Ferruginibacter sp.	MEI9958345.1	bla	subclass B3 metallo-beta-lactamase	core	AMR	AMR	BETA-LACTAM	BETA-LACTAM	HMM	292	300	94	64.89	282	WP_063842717.1	subclass B3 metallo-beta-lactamase	NF033105.1	subclass B3 metallo-beta-lactamase	2
GCA_037483205.1	Chitinophaga sp. CCNWYY40	MEJ5825411.1	aadS	AadS family aminoglycoside 6-adenylyltransferase	core	AMR	AMR	AMINOGLYCOSIDE	STREPTOMYCIN	HMM	291	287	99.65	63.99	286	WP_003013318.1	AadS family aminoglycoside 6-adenylyltransferase	NF033387.1	AadS family aminoglycoside 6-adenylyltransferase	2
GCA_037483205.1	Chitinophaga sp. CCNWYY40	MEJ5829822.1	bla	subclass B1 metallo-beta-lactamase	core	AMR	AMR	BETA-LACTAM	BETA-LACTAM	HMM	252	253	100	75.1	253	WP_119059468.1	subclass B1 metallo-beta-lactamase	NF033088.2	subclass B1 metallo-beta-lactamase	2
GCA_037483205.1	Chitinophaga sp. CCNWYY40	MEJ5829880.1	bla	class A beta-lactamase	core	AMR	AMR	BETA-LACTAM	BETA-LACTAM	HMM	299	319	86.52	47.65	277	WP_063842272.1	class A beta-lactamase	NF033103.1	class A beta-lactamase	2
GCA_037483205.1	Chitinophaga sp. CCNWYY40	MEJ5830406.1	blaOXA	class D beta-lactamase	core	AMR	AMR	BETA-LACTAM	BETA-LACTAM	HMM	269	266	96.62	37.4	262	WP_032490445.1	class D beta-lactamase	NF012161.0	class D beta-lactamase	3
GCA_037483205.1	Chitinophaga sp. CCNWYY40	MEJ5830826.1	arr	NAD(+)--rifampin ADP-ribosyltransferase	core	AMR	AMR	RIFAMYCIN	RIFAMYCIN	HMM	143	143	89.51	59.38	128	WP_063842202.1	NAD(+)--rifampin ADP-ribosyltransferase	NF033144.1	NAD(+)--rifampin ADP-ribosyltransferase	3
GCA_037483205.1	Chitinophaga sp. CCNWYY40	MEJ5831144.1	bla	BlaB/IND/MUS family subclass B1 metallo-beta-lactamase	core	AMR	AMR	BETA-LACTAM	BETA-LACTAM	HMM	241	237	99.16	46.06	241	WP_063864592.1	BlaB/IND/MUS family subclass B1 metallo-beta-lactamase	NF012146.1	BlaB/IND/MUS family subclass B1 metallo-beta-lactamase	3
GCA_037719925.1	Ferruginibacter sp.	MEJ7587103.1	blaOXA	class D beta-lactamase	core	AMR	AMR	BETA-LACTAM	BETA-LACTAM	HMM	290	269	98.51	37.45	267	WP_242934118.1	class D beta-lactamase	NF012161.0	class D beta-lactamase	1
GCA_037719925.1	Ferruginibacter sp.	MEJ7588142.1	bla	BlaB/IND/MUS family subclass B1 metallo-beta-lactamase	core	AMR	AMR	BETA-LACTAM	BETA-LACTAM	HMM	250	241	100	51.43	245	WP_148044405.1	BlaB/IND/MUS family subclass B1 metallo-beta-lactamase	NF012146.1	BlaB/IND/MUS family subclass B1 metallo-beta-lactamase	2
GCA_037719665.1	Ferruginibacter sp.	MEJ7609628.1	blaOXA	class D beta-lactamase	core	AMR	AMR	BETA-LACTAM	BETA-LACTAM	HMM	250	267	80.52	42.92	226	WP_003235647.1	class D beta-lactamase	NF012161.0	class D beta-lactamase	2
GCA_037720515.1	Ferruginibacter sp.	MEJ7626386.1	blaOXA	class D beta-lactamase	core	AMR	AMR	BETA-LACTAM	BETA-LACTAM	HMM	271	267	83.52	41.67	240	WP_003235647.1	class D beta-lactamase	NF012161.0	class D beta-lactamase	1
GCA_037721545.1	Chitinophagaceae bacterium	MEJ7822194.1	blaOXA	class D beta-lactamase	core	AMR	AMR	BETA-LACTAM	BETA-LACTAM	HMM	273	269	100	38.18	275	WP_242934118.1	class D beta-lactamase	NF012161.0	class D beta-lactamase	1
GCA_037892605.1	Lacibacter sp. H407	MEJ8819012.1	bla	subclass B1 metallo-beta-lactamase	core	AMR	AMR	BETA-LACTAM	BETA-LACTAM	HMM	252	252	100	65.08	252	WP_202272142.1	subclass B1 metallo-beta-lactamase	NF033088.2	subclass B1 metallo-beta-lactamase	3
GCA_037892605.1	Lacibacter sp. H407	MEJ8819282.1	arr	NAD(+)--rifampin ADP-ribosyltransferase	core	AMR	AMR	RIFAMYCIN	RIFAMYCIN	HMM	148	137	98.54	57.78	135	WP_012695486.1	NAD(+)--rifampin ADP-ribosyltransferase	NF033144.1	NAD(+)--rifampin ADP-ribosyltransferase	3
GCA_037892425.1	Lacibacter sp. H375	MEJ8843891.1	bla	subclass B1 metallo-beta-lactamase	core	AMR	AMR	BETA-LACTAM	BETA-LACTAM	HMM	249	252	100	71.03	252	WP_202272142.1	subclass B1 metallo-beta-lactamase	NF033088.2	subclass B1 metallo-beta-lactamase	3
GCA_037892425.1	Lacibacter sp. H375	MEJ8843894.1	arr	NAD(+)--rifampin ADP-ribosyltransferase	core	AMR	AMR	RIFAMYCIN	RIFAMYCIN	HMM	148	137	100	59.85	137	WP_012695486.1	NAD(+)--rifampin ADP-ribosyltransferase	NF033144.1	NAD(+)--rifampin ADP-ribosyltransferase	1
GCA_038040595.1	Chitinophaga sp. CCNWLY40	MEK6500808.1	aadS	AadS family aminoglycoside 6-adenylyltransferase	core	AMR	AMR	AMINOGLYCOSIDE	STREPTOMYCIN	HMM	291	287	99.65	63.99	286	WP_003013318.1	AadS family aminoglycoside 6-adenylyltransferase	NF033387.1	AadS family aminoglycoside 6-adenylyltransferase	3
GCA_038040595.1	Chitinophaga sp. CCNWLY40	MEK6505217.1	bla	subclass B1 metallo-beta-lactamase	core	AMR	AMR	BETA-LACTAM	BETA-LACTAM	HMM	252	253	100	75.1	253	WP_119059468.1	subclass B1 metallo-beta-lactamase	NF033088.2	subclass B1 metallo-beta-lactamase	3
GCA_038040595.1	Chitinophaga sp. CCNWLY40	MEK6505275.1	bla	class A beta-lactamase	core	AMR	AMR	BETA-LACTAM	BETA-LACTAM	HMM	299	319	86.52	47.65	277	WP_063842272.1	class A beta-lactamase	NF033103.1	class A beta-lactamase	3
GCA_038040595.1	Chitinophaga sp. CCNWLY40	MEK6505801.1	blaOXA	class D beta-lactamase	core	AMR	AMR	BETA-LACTAM	BETA-LACTAM	HMM	269	266	96.62	37.4	262	WP_032490445.1	class D beta-lactamase	NF012161.0	class D beta-lactamase	3
GCA_038040595.1	Chitinophaga sp. CCNWLY40	MEK6506220.1	arr	NAD(+)--rifampin ADP-ribosyltransferase	core	AMR	AMR	RIFAMYCIN	RIFAMYCIN	HMM	143	143	89.51	59.38	128	WP_063842202.1	NAD(+)--rifampin ADP-ribosyltransferase	NF033144.1	NAD(+)--rifampin ADP-ribosyltransferase	3
GCA_038040595.1	Chitinophaga sp. CCNWLY40	MEK6506538.1	bla	BlaB/IND/MUS family subclass B1 metallo-beta-lactamase	core	AMR	AMR	BETA-LACTAM	BETA-LACTAM	HMM	241	237	99.16	46.06	241	WP_063864592.1	BlaB/IND/MUS family subclass B1 metallo-beta-lactamase	NF012146.1	BlaB/IND/MUS family subclass B1 metallo-beta-lactamase	3
GCA_039652435.1	Niabella sp. N803	MEN3693296.1	bla	subclass B3 metallo-beta-lactamase	core	AMR	AMR	BETA-LACTAM	BETA-LACTAM	HMM	283	290	96.55	62.5	280	WP_059323095.1	subclass B3 metallo-beta-lactamase	NF033105.1	subclass B3 metallo-beta-lactamase	1
GCA_039652435.1	Niabella sp. N803	MEN3693479.1	arr	NAD(+)--rifampin ADP-ribosyltransferase	core	AMR	AMR	RIFAMYCIN	RIFAMYCIN	HMM	138	137	93.43	57.81	128	WP_012695486.1	NAD(+)--rifampin ADP-ribosyltransferase	NF033144.1	NAD(+)--rifampin ADP-ribosyltransferase	1
GCA_039710165.1	Chitinophaga sp. CCNWLY40-1	MEN7512873.1	aadS	AadS family aminoglycoside 6-adenylyltransferase	core	AMR	AMR	AMINOGLYCOSIDE	STREPTOMYCIN	HMM	291	287	99.65	63.99	286	WP_003013318.1	AadS family aminoglycoside 6-adenylyltransferase	NF033387.1	AadS family aminoglycoside 6-adenylyltransferase	2
GCA_039710165.1	Chitinophaga sp. CCNWLY40-1	MEN7516346.1	bla	subclass B1 metallo-beta-lactamase	core	AMR	AMR	BETA-LACTAM	BETA-LACTAM	HMM	252	253	100	75.1	253	WP_119059468.1	subclass B1 metallo-beta-lactamase	NF033088.2	subclass B1 metallo-beta-lactamase	2
GCA_039710165.1	Chitinophaga sp. CCNWLY40-1	MEN7516404.1	bla	class A beta-lactamase	core	AMR	AMR	BETA-LACTAM	BETA-LACTAM	HMM	299	319	86.52	47.65	277	WP_063842272.1	class A beta-lactamase	NF033103.1	class A beta-lactamase	1
GCA_039710165.1	Chitinophaga sp. CCNWLY40-1	MEN7517419.1	blaOXA	class D beta-lactamase	core	AMR	AMR	BETA-LACTAM	BETA-LACTAM	HMM	269	266	96.62	37.4	262	WP_032490445.1	class D beta-lactamase	NF012161.0	class D beta-lactamase	1
GCA_039710165.1	Chitinophaga sp. CCNWLY40-1	MEN7518290.1	arr	NAD(+)--rifampin ADP-ribosyltransferase	core	AMR	AMR	RIFAMYCIN	RIFAMYCIN	HMM	143	143	89.51	59.38	128	WP_063842202.1	NAD(+)--rifampin ADP-ribosyltransferase	NF033144.1	NAD(+)--rifampin ADP-ribosyltransferase	1
GCA_039710165.1	Chitinophaga sp. CCNWLY40-1	MEN7518580.1	bla	BlaB/IND/MUS family subclass B1 metallo-beta-lactamase	core	AMR	AMR	BETA-LACTAM	BETA-LACTAM	HMM	241	237	99.16	46.06	241	WP_063864592.1	BlaB/IND/MUS family subclass B1 metallo-beta-lactamase	NF012146.1	BlaB/IND/MUS family subclass B1 metallo-beta-lactamase	1
GCA_039914465.1	Chitinophagaceae bacterium	MEO5562511.1	bla	subclass B3 metallo-beta-lactamase	core	AMR	AMR	BETA-LACTAM	BETA-LACTAM	HMM	294	300	96	55.21	288	WP_063842717.1	subclass B3 metallo-beta-lactamase	NF033105.1	subclass B3 metallo-beta-lactamase	2
GCA_039915085.1	Chitinophagaceae bacterium	MEO5591942.1	arr	NAD(+)--rifampin ADP-ribosyltransferase	core	AMR	AMR	RIFAMYCIN	RIFAMYCIN	HMM	137	150	76	56.14	114	WP_033959319.1	NAD(+)--rifampin ADP-ribosyltransferase	NF033144.1	NAD(+)--rifampin ADP-ribosyltransferase	2
GCA_039915085.1	Chitinophagaceae bacterium	MEO5592456.1	bla	BlaB/IND/MUS family subclass B1 metallo-beta-lactamase	core	AMR	AMR	BETA-LACTAM	BETA-LACTAM	HMM	244	241	97.51	57.32	239	WP_148044405.1	BlaB/IND/MUS family subclass B1 metallo-beta-lactamase	NF012146.1	BlaB/IND/MUS family subclass B1 metallo-beta-lactamase	2
GCA_039915085.1	Chitinophagaceae bacterium	MEO5594043.1	arsN2	arsenic resistance N-acetyltransferase ArsN2	plus	STRESS	METAL	ARSENIC	ARSENIC	HMM	146	164	84.15	34.78	138	ABU58394.1	arsenic resistance N-acetyltransferase ArsN2	NF040501.1	arsenic resistance N-acetyltransferase ArsN2	2
GCA_039914935.1	Chitinophagaceae bacterium	MEO5636719.1	arsN2	arsenic resistance N-acetyltransferase ArsN2	plus	STRESS	METAL	ARSENIC	ARSENIC	HMM	146	164	84.15	34.78	138	ABU58394.1	arsenic resistance N-acetyltransferase ArsN2	NF040501.1	arsenic resistance N-acetyltransferase ArsN2	4
GCA_039914935.1	Chitinophagaceae bacterium	MEO5638600.1	arr	NAD(+)--rifampin ADP-ribosyltransferase	core	AMR	AMR	RIFAMYCIN	RIFAMYCIN	HMM	137	150	76	56.14	114	WP_033959319.1	NAD(+)--rifampin ADP-ribosyltransferase	NF033144.1	NAD(+)--rifampin ADP-ribosyltransferase	4
GCA_039914935.1	Chitinophagaceae bacterium	MEO5639676.1	bla	BlaB/IND/MUS family subclass B1 metallo-beta-lactamase	core	AMR	AMR	BETA-LACTAM	BETA-LACTAM	HMM	244	241	97.51	57.32	239	WP_148044405.1	BlaB/IND/MUS family subclass B1 metallo-beta-lactamase	NF012146.1	BlaB/IND/MUS family subclass B1 metallo-beta-lactamase	4
GCA_039915005.1	Ginsengibacter sp.	MEO5650614.1	blaOXA	class D beta-lactamase	core	AMR	AMR	BETA-LACTAM	BETA-LACTAM	HMM	270	274	100	39.49	276	WP_004295324.1	class D beta-lactamase	NF012161.0	class D beta-lactamase	4
GCA_039915225.1	Chitinophagaceae bacterium	MEO5681174.1	arr	NAD(+)--rifampin ADP-ribosyltransferase	core	AMR	AMR	RIFAMYCIN	RIFAMYCIN	HMM	148	137	94.89	63.08	130	WP_012695486.1	NAD(+)--rifampin ADP-ribosyltransferase	NF033144.1	NAD(+)--rifampin ADP-ribosyltransferase	2
GCA_039915225.1	Chitinophagaceae bacterium	MEO5682638.1	arsN2	arsenic resistance N-acetyltransferase ArsN2	plus	STRESS	METAL	ARSENIC	ARSENIC	HMM	152	164	79.27	39.23	130	ABU58394.1	arsenic resistance N-acetyltransferase ArsN2	NF040501.1	arsenic resistance N-acetyltransferase ArsN2	2
GCA_039915225.1	Chitinophagaceae bacterium	MEO5685131.1	bla	BlaB/IND/MUS family subclass B1 metallo-beta-lactamase	core	AMR	AMR	BETA-LACTAM	BETA-LACTAM	HMM	245	246	95.53	55.7	237	WP_318245543.1	BlaB/IND/MUS family subclass B1 metallo-beta-lactamase	NF012146.1	BlaB/IND/MUS family subclass B1 metallo-beta-lactamase	1
GCA_039916305.1	Chitinophagaceae bacterium	MEO5846288.1	arsN2	arsenic resistance N-acetyltransferase ArsN2	plus	STRESS	METAL	ARSENIC	ARSENIC	HMM	152	164	79.27	39.23	130	ABU58394.1	arsenic resistance N-acetyltransferase ArsN2	NF040501.1	arsenic resistance N-acetyltransferase ArsN2	2
GCA_039916305.1	Chitinophagaceae bacterium	MEO5848772.1	arr	NAD(+)--rifampin ADP-ribosyltransferase	core	AMR	AMR	RIFAMYCIN	RIFAMYCIN	HMM	148	137	94.89	63.08	130	WP_012695486.1	NAD(+)--rifampin ADP-ribosyltransferase	NF033144.1	NAD(+)--rifampin ADP-ribosyltransferase	2
GCA_039916305.1	Chitinophagaceae bacterium	MEO5849779.1	bla	BlaB/IND/MUS family subclass B1 metallo-beta-lactamase	core	AMR	AMR	BETA-LACTAM	BETA-LACTAM	HMM	245	246	95.53	55.7	237	WP_318245543.1	BlaB/IND/MUS family subclass B1 metallo-beta-lactamase	NF012146.1	BlaB/IND/MUS family subclass B1 metallo-beta-lactamase	1
GCA_039916545.1	Ferruginibacter sp.	MEO5888730.1	blaOXA	class D beta-lactamase	core	AMR	AMR	BETA-LACTAM	BETA-LACTAM	HMM	272	258	97.29	41.76	261	WP_004919358.1	class D beta-lactamase	NF012161.0	class D beta-lactamase	1
GCA_039916545.1	Ferruginibacter sp.	MEO5894003.1	bla	BlaB/IND/MUS family subclass B1 metallo-beta-lactamase	core	AMR	AMR	BETA-LACTAM	BETA-LACTAM	HMM	243	241	95.44	59.15	235	WP_148044405.1	BlaB/IND/MUS family subclass B1 metallo-beta-lactamase	NF012146.1	BlaB/IND/MUS family subclass B1 metallo-beta-lactamase	1
GCA_039917435.1	Ferruginibacter sp.	MEO5942466.1	bla	subclass B3 metallo-beta-lactamase	core	AMR	AMR	BETA-LACTAM	BETA-LACTAM	HMM	295	289	96.19	66.91	278	WP_041884311.1	subclass B3 metallo-beta-lactamase	NF033105.1	subclass B3 metallo-beta-lactamase	1
GCA_039917435.1	Ferruginibacter sp.	MEO5944016.1	blaOXA	class D beta-lactamase	core	AMR	AMR	BETA-LACTAM	BETA-LACTAM	HMM	270	270	97.04	37.97	266	WP_178317675.1	class D beta-lactamase	NF012161.0	class D beta-lactamase	1
GCA_039917095.1	Chitinophagaceae bacterium	MEO6000609.1	arr	NAD(+)--rifampin ADP-ribosyltransferase	core	AMR	AMR	RIFAMYCIN	RIFAMYCIN	HMM	149	143	96.5	55.07	138	WP_063842202.1	NAD(+)--rifampin ADP-ribosyltransferase	NF033144.1	NAD(+)--rifampin ADP-ribosyltransferase	1
GCA_039918155.1	Ferruginibacter sp.	MEO6127981.1	blaOXA	class D beta-lactamase	core	AMR	AMR	BETA-LACTAM	BETA-LACTAM	HMM	270	270	97.04	37.97	266	WP_178317675.1	class D beta-lactamase	NF012161.0	class D beta-lactamase	1
GCA_039918155.1	Ferruginibacter sp.	MEO6129842.1	bla	subclass B3 metallo-beta-lactamase	core	AMR	AMR	BETA-LACTAM	BETA-LACTAM	HMM	295	289	96.19	66.91	278	WP_041884311.1	subclass B3 metallo-beta-lactamase	NF033105.1	subclass B3 metallo-beta-lactamase	1
GCA_039918275.1	Ginsengibacter sp.	MEO6135478.1	arr	NAD(+)--rifampin ADP-ribosyltransferase	core	AMR	AMR	RIFAMYCIN	RIFAMYCIN	HMM	148	137	91.24	58.4	125	WP_012695486.1	NAD(+)--rifampin ADP-ribosyltransferase	NF033144.1	NAD(+)--rifampin ADP-ribosyltransferase	1
GCA_039918275.1	Ginsengibacter sp.	MEO6135591.1	blaOXA	class D beta-lactamase	core	AMR	AMR	BETA-LACTAM	BETA-LACTAM	HMM	270	274	100	36.46	277	WP_004295324.1	class D beta-lactamase	NF012161.0	class D beta-lactamase	1
GCA_039918275.1	Ginsengibacter sp.	MEO6136265.1	bla	subclass B1 metallo-beta-lactamase	core	AMR	AMR	BETA-LACTAM	BETA-LACTAM	HMM	269	266	96.99	55.81	258	WP_081048762.1	subclass B1 metallo-beta-lactamase	NF033088.2	subclass B1 metallo-beta-lactamase	1
GCA_039918315.1	Ginsengibacter sp.	MEO6139679.1	bla	subclass B1 metallo-beta-lactamase	core	AMR	AMR	BETA-LACTAM	BETA-LACTAM	HMM	269	266	96.99	55.81	258	WP_081048762.1	subclass B1 metallo-beta-lactamase	NF033088.2	subclass B1 metallo-beta-lactamase	1
GCA_039918315.1	Ginsengibacter sp.	MEO6140801.1	blaOXA	class D beta-lactamase	core	AMR	AMR	BETA-LACTAM	BETA-LACTAM	HMM	270	274	100	36.46	277	WP_004295324.1	class D beta-lactamase	NF012161.0	class D beta-lactamase	1
GCA_039918315.1	Ginsengibacter sp.	MEO6141438.1	arr	NAD(+)--rifampin ADP-ribosyltransferase	core	AMR	AMR	RIFAMYCIN	RIFAMYCIN	HMM	148	137	91.24	58.4	125	WP_012695486.1	NAD(+)--rifampin ADP-ribosyltransferase	NF033144.1	NAD(+)--rifampin ADP-ribosyltransferase	1
GCA_039918815.1	Ginsengibacter sp.	MEO6187702.1	bla	subclass B3 metallo-beta-lactamase	core	AMR	AMR	BETA-LACTAM	BETA-LACTAM	HMM	293	290	99.31	62.15	288	WP_073552023.1	subclass B3 metallo-beta-lactamase	NF033105.1	subclass B3 metallo-beta-lactamase	1
GCA_039919115.1	Ginsengibacter sp.	MEO6220999.1	blaOXA	class D beta-lactamase	core	AMR	AMR	BETA-LACTAM	BETA-LACTAM	HMM	270	270	97.41	38.29	269	WP_178317675.1	class D beta-lactamase	NF012161.0	class D beta-lactamase	1
GCA_039918835.1	Ferruginibacter sp.	MEO6232481.1	bla	subclass B3 metallo-beta-lactamase	core	AMR	AMR	BETA-LACTAM	BETA-LACTAM	HMM	291	293	97.27	64.21	285	WP_063842707.1	subclass B3 metallo-beta-lactamase	NF033105.1	subclass B3 metallo-beta-lactamase	1
GCA_039918835.1	Ferruginibacter sp.	MEO6232779.1	arr	NAD(+)--rifampin ADP-ribosyltransferase	core	AMR	AMR	RIFAMYCIN	RIFAMYCIN	HMM	145	137	95.62	57.25	131	WP_012695486.1	NAD(+)--rifampin ADP-ribosyltransferase	NF033144.1	NAD(+)--rifampin ADP-ribosyltransferase	1
GCA_039918835.1	Ferruginibacter sp.	MEO6233494.1	blaOXA	class D beta-lactamase	core	AMR	AMR	BETA-LACTAM	BETA-LACTAM	HMM	274	280	95.36	36.86	274	WP_081401608.1	class D beta-lactamase	NF012161.0	class D beta-lactamase	5
GCA_039919015.1	Ferruginibacter sp.	MEO6253830.1	bla	class A beta-lactamase, subclass A2	core	AMR	AMR	BETA-LACTAM	BETA-LACTAM	HMM	301	304	98.68	57.33	300	WP_154469535.1	class A beta-lactamase, subclass A2	NF012099.1	class A beta-lactamase, subclass A2	5
GCA_039918735.1	Ginsengibacter sp.	MEO6258522.1	bla	subclass B3 metallo-beta-lactamase	core	AMR	AMR	BETA-LACTAM	BETA-LACTAM	HMM	293	290	99.31	62.15	288	WP_073552023.1	subclass B3 metallo-beta-lactamase	NF033105.1	subclass B3 metallo-beta-lactamase	5
GCA_039918935.1	Ginsengibacter sp.	MEO6289668.1	blaOXA	class D beta-lactamase	core	AMR	AMR	BETA-LACTAM	BETA-LACTAM	HMM	268	258	95.35	40.78	255	WP_004919358.1	class D beta-lactamase	NF012161.0	class D beta-lactamase	5
GCA_039919885.1	Chitinophagaceae bacterium	MEO6315059.1	arr	NAD(+)--rifampin ADP-ribosyltransferase	core	AMR	AMR	RIFAMYCIN	RIFAMYCIN	HMM	157	137	91.97	59.52	126	WP_012695486.1	NAD(+)--rifampin ADP-ribosyltransferase	NF033144.1	NAD(+)--rifampin ADP-ribosyltransferase	5
GCA_039919885.1	Chitinophagaceae bacterium	MEO6316887.1	bla	class A beta-lactamase, subclass A2	core	AMR	AMR	BETA-LACTAM	BETA-LACTAM	HMM	297	303	95.38	51.21	289	WP_041881964.1	class A beta-lactamase, subclass A2	NF012099.1	class A beta-lactamase, subclass A2	2
GCA_039919615.1	Ginsengibacter sp.	MEO6330194.1	bla	subclass B3 metallo-beta-lactamase	core	AMR	AMR	BETA-LACTAM	BETA-LACTAM	HMM	295	289	99.65	64.93	288	WP_041884311.1	subclass B3 metallo-beta-lactamase	NF033105.1	subclass B3 metallo-beta-lactamase	2
GCA_039919615.1	Ginsengibacter sp.	MEO6330926.1	blaOXA	class D beta-lactamase	core	AMR	AMR	BETA-LACTAM	BETA-LACTAM	HMM	275	268	98.51	37.96	274	WP_003328240.1	class D beta-lactamase	NF012161.0	class D beta-lactamase	1
GCA_039919665.1	Ferruginibacter sp.	MEO6355498.1	bla	subclass B3 metallo-beta-lactamase	core	AMR	AMR	BETA-LACTAM	BETA-LACTAM	HMM	291	293	94.54	68.2	283	WP_063842707.1	subclass B3 metallo-beta-lactamase	NF033105.1	subclass B3 metallo-beta-lactamase	3
GCA_039919665.1	Ferruginibacter sp.	MEO6358607.1	blaOXA	class D beta-lactamase	core	AMR	AMR	BETA-LACTAM	BETA-LACTAM	HMM	274	258	97.67	39.85	261	WP_004919358.1	class D beta-lactamase	NF012161.0	class D beta-lactamase	3
GCA_039920245.1	Ferruginibacter sp.	MEO6404950.1	bla	BlaB/IND/MUS family subclass B1 metallo-beta-lactamase	core	AMR	AMR	BETA-LACTAM	BETA-LACTAM	HMM	249	248	98.79	55.1	245	WP_012025466.1	BlaB/IND/MUS family subclass B1 metallo-beta-lactamase	NF012146.1	BlaB/IND/MUS family subclass B1 metallo-beta-lactamase	3
GCA_039921185.1	Ginsengibacter sp.	MEO6453349.1	bla	subclass B3 metallo-beta-lactamase	core	AMR	AMR	BETA-LACTAM	BETA-LACTAM	HMM	217	289	75.43	66.06	218	WP_041884311.1	subclass B3 metallo-beta-lactamase	NF033105.1	subclass B3 metallo-beta-lactamase	1
GCA_039921105.1	Ferruginibacter sp.	MEO6479012.1	bla	subclass B3 metallo-beta-lactamase	core	AMR	AMR	BETA-LACTAM	BETA-LACTAM	HMM	291	293	97.27	64.21	285	WP_063842707.1	subclass B3 metallo-beta-lactamase	NF033105.1	subclass B3 metallo-beta-lactamase	2
GCA_039921105.1	Ferruginibacter sp.	MEO6480992.1	blaOXA	class D beta-lactamase	core	AMR	AMR	BETA-LACTAM	BETA-LACTAM	HMM	274	280	95.36	36.86	274	WP_081401608.1	class D beta-lactamase	NF012161.0	class D beta-lactamase	2
GCA_039921105.1	Ferruginibacter sp.	MEO6483581.1	arr	NAD(+)--rifampin ADP-ribosyltransferase	core	AMR	AMR	RIFAMYCIN	RIFAMYCIN	HMM	145	137	95.62	57.25	131	WP_012695486.1	NAD(+)--rifampin ADP-ribosyltransferase	NF033144.1	NAD(+)--rifampin ADP-ribosyltransferase	2
GCA_039920685.1	Ferruginibacter sp.	MEO6489613.1	blaOXA	class D beta-lactamase	core	AMR	AMR	BETA-LACTAM	BETA-LACTAM	HMM	275	262	98.09	38.89	270	WP_041816295.1	class D beta-lactamase	NF012161.0	class D beta-lactamase	2
GCA_039920545.1	Ferruginibacter sp.	MEO6537587.1	blaOXA	class D beta-lactamase	core	AMR	AMR	BETA-LACTAM	BETA-LACTAM	HMM	272	258	97.67	41.44	263	WP_004919358.1	class D beta-lactamase	NF012161.0	class D beta-lactamase	2
GCA_039921165.1	Ferruginibacter sp.	MEO6539477.1	arsN2	arsenic resistance N-acetyltransferase ArsN2	plus	STRESS	METAL	ARSENIC	ARSENIC	HMM	146	164	62.8	31.07	103	ABU58394.1	arsenic resistance N-acetyltransferase ArsN2	NF040501.1	arsenic resistance N-acetyltransferase ArsN2	2
GCA_039921165.1	Ferruginibacter sp.	MEO6542054.1	bla	class A beta-lactamase, subclass A2	core	AMR	AMR	BETA-LACTAM	BETA-LACTAM	HMM	298	304	96.05	59.59	292	WP_064964607.1	class A beta-lactamase, subclass A2	NF012099.1	class A beta-lactamase, subclass A2	1
GCA_039921265.1	Ferruginibacter sp.	MEO6547109.1	bla	subclass B3 metallo-beta-lactamase	core	AMR	AMR	BETA-LACTAM	BETA-LACTAM	HMM	295	293	95.22	66.9	284	WP_063842707.1	subclass B3 metallo-beta-lactamase	NF033105.1	subclass B3 metallo-beta-lactamase	4
GCA_039921265.1	Ferruginibacter sp.	MEO6550525.1	blaOXA	class D beta-lactamase	core	AMR	AMR	BETA-LACTAM	BETA-LACTAM	HMM	273	269	94.42	39	259	WP_063861316.1	class D beta-lactamase	NF012161.0	class D beta-lactamase	4
GCA_039921045.1	Ferruginibacter sp.	MEO6555975.1	blaOXA	class D beta-lactamase	core	AMR	AMR	BETA-LACTAM	BETA-LACTAM	HMM	275	262	98.09	38.89	270	WP_041816295.1	class D beta-lactamase	NF012161.0	class D beta-lactamase	4
GCA_039920525.1	Ferruginibacter sp.	MEO6583135.1	blaOXA	class D beta-lactamase	core	AMR	AMR	BETA-LACTAM	BETA-LACTAM	HMM	273	258	96.12	41.86	258	WP_004919358.1	class D beta-lactamase	NF012161.0	class D beta-lactamase	4
GCA_039921505.1	Chitinophagaceae bacterium	MEO6611546.1	blaOXA	class D beta-lactamase	core	AMR	AMR	BETA-LACTAM	BETA-LACTAM	HMM	270	271	89.3	40.89	247	WP_102607462.1	class D beta-lactamase	NF012161.0	class D beta-lactamase	1
GCA_039921505.1	Chitinophagaceae bacterium	MEO6613547.1	bla	BlaB/IND/MUS family subclass B1 metallo-beta-lactamase	core	AMR	AMR	BETA-LACTAM	BETA-LACTAM	HMM	244	241	95.44	56.9	232	WP_148044405.1	BlaB/IND/MUS family subclass B1 metallo-beta-lactamase	NF012146.1	BlaB/IND/MUS family subclass B1 metallo-beta-lactamase	2
GCA_039921665.1	Ginsengibacter sp.	MEO6637290.1	bla	subclass B3 metallo-beta-lactamase	core	AMR	AMR	BETA-LACTAM	BETA-LACTAM	HMM	289	293	96.59	65.37	283	WP_063842707.1	subclass B3 metallo-beta-lactamase	NF033105.1	subclass B3 metallo-beta-lactamase	2
GCA_039921665.1	Ginsengibacter sp.	MEO6638444.1	blaOXA	class D beta-lactamase	core	AMR	AMR	BETA-LACTAM	BETA-LACTAM	HMM	270	278	98.56	38.79	281	WP_032865068.1	class D beta-lactamase	NF012161.0	class D beta-lactamase	2
GCA_039921525.1	Chitinophagaceae bacterium	MEO6650139.1	arr	NAD(+)--rifampin ADP-ribosyltransferase	core	AMR	AMR	RIFAMYCIN	RIFAMYCIN	HMM	149	143	96.5	55.07	138	WP_063842202.1	NAD(+)--rifampin ADP-ribosyltransferase	NF033144.1	NAD(+)--rifampin ADP-ribosyltransferase	2
GCA_039921685.1	Ferruginibacter sp.	MEO6668185.1	blaOXA	class D beta-lactamase	core	AMR	AMR	BETA-LACTAM	BETA-LACTAM	HMM	274	269	100	38.55	275	WP_242934118.1	class D beta-lactamase	NF012161.0	class D beta-lactamase	1
GCA_039921685.1	Ferruginibacter sp.	MEO6669507.1	bla	BlaB/IND/MUS family subclass B1 metallo-beta-lactamase	core	AMR	AMR	BETA-LACTAM	BETA-LACTAM	HMM	255	246	97.15	60.42	240	WP_318245543.1	BlaB/IND/MUS family subclass B1 metallo-beta-lactamase	NF012146.1	BlaB/IND/MUS family subclass B1 metallo-beta-lactamase	2
GCA_039921405.1	Ginsengibacter sp.	MEO6673241.1	blaOXA	class D beta-lactamase	core	AMR	AMR	BETA-LACTAM	BETA-LACTAM	HMM	275	268	98.51	37.96	274	WP_003328240.1	class D beta-lactamase	NF012161.0	class D beta-lactamase	2
GCA_039921405.1	Ginsengibacter sp.	MEO6674453.1	bla	subclass B3 metallo-beta-lactamase	core	AMR	AMR	BETA-LACTAM	BETA-LACTAM	HMM	295	289	99.65	64.93	288	WP_041884311.1	subclass B3 metallo-beta-lactamase	NF033105.1	subclass B3 metallo-beta-lactamase	3
GCA_039922075.1	Ginsengibacter sp.	MEO6705323.1	blaOXA	class D beta-lactamase	core	AMR	AMR	BETA-LACTAM	BETA-LACTAM	HMM	270	274	100	39.49	276	WP_004295324.1	class D beta-lactamase	NF012161.0	class D beta-lactamase	3
GCA_039922055.1	Ferruginibacter sp.	MEO6720068.1	bla	subclass B3 metallo-beta-lactamase	core	AMR	AMR	BETA-LACTAM	BETA-LACTAM	HMM	295	293	94.88	66.55	278	WP_063842707.1	subclass B3 metallo-beta-lactamase	NF033105.1	subclass B3 metallo-beta-lactamase	3
GCA_039922055.1	Ferruginibacter sp.	MEO6720580.1	arr	NAD(+)--rifampin ADP-ribosyltransferase	core	AMR	AMR	RIFAMYCIN	RIFAMYCIN	HMM	247	143	82.52	55.93	118	WP_063842202.1	NAD(+)--rifampin ADP-ribosyltransferase	NF033144.1	NAD(+)--rifampin ADP-ribosyltransferase	3
GCA_039922375.1	Ferruginibacter sp.	MEO6734594.1	blaOXA	class D beta-lactamase	core	AMR	AMR	BETA-LACTAM	BETA-LACTAM	HMM	274	267	94.38	40.15	264	WP_003235647.1	class D beta-lactamase	NF012161.0	class D beta-lactamase	3
GCA_039922575.1	Ginsengibacter sp.	MEO6813191.1	blaOXA	class D beta-lactamase	core	AMR	AMR	BETA-LACTAM	BETA-LACTAM	HMM	270	274	100	37.91	277	WP_004295324.1	class D beta-lactamase	NF012161.0	class D beta-lactamase	3
GCA_039923035.1	Ginsengibacter sp.	MEO6837477.1	bla	subclass B3 metallo-beta-lactamase	core	AMR	AMR	BETA-LACTAM	BETA-LACTAM	HMM	291	293	99.66	63.7	292	WP_063842707.1	subclass B3 metallo-beta-lactamase	NF033105.1	subclass B3 metallo-beta-lactamase	2
GCA_039923035.1	Ginsengibacter sp.	MEO6838660.1	arr	NAD(+)--rifampin ADP-ribosyltransferase	core	AMR	AMR	RIFAMYCIN	RIFAMYCIN	HMM	149	143	96.5	55.07	138	WP_063842202.1	NAD(+)--rifampin ADP-ribosyltransferase	NF033144.1	NAD(+)--rifampin ADP-ribosyltransferase	2
GCA_039923695.1	Ginsengibacter sp.	MEO6948846.1	bla	subclass B1 metallo-beta-lactamase	core	AMR	AMR	BETA-LACTAM	BETA-LACTAM	HMM	235	266	82.71	58.64	220	WP_081048762.1	subclass B1 metallo-beta-lactamase	NF033088.2	subclass B1 metallo-beta-lactamase	2
GCA_039924255.1	Ferruginibacter sp.	MEO7044612.1	bla	BlaB/IND/MUS family subclass B1 metallo-beta-lactamase	core	AMR	AMR	BETA-LACTAM	BETA-LACTAM	HMM	244	248	95.16	49.15	236	WP_012025466.1	BlaB/IND/MUS family subclass B1 metallo-beta-lactamase	NF012146.1	BlaB/IND/MUS family subclass B1 metallo-beta-lactamase	2
GCA_039924255.1	Ferruginibacter sp.	MEO7049032.1	blaOXA	class D beta-lactamase	core	AMR	AMR	BETA-LACTAM	BETA-LACTAM	HMM	272	270	96.3	38.35	266	WP_178317675.1	class D beta-lactamase	NF012161.0	class D beta-lactamase	3
GCA_039924255.1	Ferruginibacter sp.	MEO7049763.1	bla	class A beta-lactamase, subclass A2	core	AMR	AMR	BETA-LACTAM	BETA-LACTAM	HMM	258	290	86.9	53.94	254	WP_061710074.1	class A beta-lactamase, subclass A2	NF012099.1	class A beta-lactamase, subclass A2	3
GCA_039924905.1	Ferruginibacter sp.	MEO7141729.1	bla	BlaB/IND/MUS family subclass B1 metallo-beta-lactamase	core	AMR	AMR	BETA-LACTAM	BETA-LACTAM	HMM	249	248	98.79	55.1	245	WP_012025466.1	BlaB/IND/MUS family subclass B1 metallo-beta-lactamase	NF012146.1	BlaB/IND/MUS family subclass B1 metallo-beta-lactamase	3
GCA_040110925.1	Ferruginibacter sp.	MEO7264489.1	blaOXA	class D beta-lactamase	core	AMR	AMR	BETA-LACTAM	BETA-LACTAM	HMM	274	267	85.77	41.8	244	WP_003235647.1	class D beta-lactamase	NF012161.0	class D beta-lactamase	1
GCA_039926165.1	Ginsengibacter sp.	MEO7294269.1	arr	NAD(+)--rifampin ADP-ribosyltransferase	core	AMR	AMR	RIFAMYCIN	RIFAMYCIN	HMM	141	143	87.41	50.4	125	WP_063842202.1	NAD(+)--rifampin ADP-ribosyltransferase	NF033144.1	NAD(+)--rifampin ADP-ribosyltransferase	1
GCA_039926045.1	Ferruginibacter sp.	MEO7306444.1	bla	class A beta-lactamase, subclass A2	core	AMR	AMR	BETA-LACTAM	BETA-LACTAM	HMM	298	304	98.68	58.67	300	WP_154469535.1	class A beta-lactamase, subclass A2	NF012099.1	class A beta-lactamase, subclass A2	2
GCA_039925965.1	Chitinophagaceae bacterium	MEO7308846.1	bla	BlaB/IND/MUS family subclass B1 metallo-beta-lactamase	core	AMR	AMR	BETA-LACTAM	BETA-LACTAM	HMM	243	237	97.89	53.85	234	WP_063864592.1	BlaB/IND/MUS family subclass B1 metallo-beta-lactamase	NF012146.1	BlaB/IND/MUS family subclass B1 metallo-beta-lactamase	2
GCA_039925965.1	Chitinophagaceae bacterium	MEO7309933.1	blaOXA	class D beta-lactamase	core	AMR	AMR	BETA-LACTAM	BETA-LACTAM	HMM	273	273	97.8	38.1	273	WP_016657654.1	class D beta-lactamase	NF012161.0	class D beta-lactamase	1
GCA_039926825.1	Ferruginibacter sp.	MEO7446497.1	blaOXA	class D beta-lactamase	core	AMR	AMR	BETA-LACTAM	BETA-LACTAM	HMM	272	269	94.42	37.84	259	WP_063861316.1	class D beta-lactamase	NF012161.0	class D beta-lactamase	1
GCA_039926805.1	Chitinophagaceae bacterium	MEO7451638.1	bla	class A beta-lactamase, subclass A2	core	AMR	AMR	BETA-LACTAM	BETA-LACTAM	HMM	294	303	95.38	51.21	289	WP_041881964.1	class A beta-lactamase, subclass A2	NF012099.1	class A beta-lactamase, subclass A2	3
GCA_039926805.1	Chitinophagaceae bacterium	MEO7451950.1	arr	NAD(+)--rifampin ADP-ribosyltransferase	core	AMR	AMR	RIFAMYCIN	RIFAMYCIN	HMM	157	137	91.97	59.52	126	WP_012695486.1	NAD(+)--rifampin ADP-ribosyltransferase	NF033144.1	NAD(+)--rifampin ADP-ribosyltransferase	3
GCA_039927075.1	Ferruginibacter sp.	MEO7461684.1	blaOXA	class D beta-lactamase	core	AMR	AMR	BETA-LACTAM	BETA-LACTAM	HMM	272	269	94.42	37.84	259	WP_063861316.1	class D beta-lactamase	NF012161.0	class D beta-lactamase	3
GCA_039927275.1	Ferruginibacter sp.	MEO7483027.1	blaOXA	class D beta-lactamase	core	AMR	AMR	BETA-LACTAM	BETA-LACTAM	HMM	274	267	85.77	41.8	244	WP_003235647.1	class D beta-lactamase	NF012161.0	class D beta-lactamase	1
GCA_039926995.1	Ferruginibacter sp.	MEO7486719.1	bla	subclass B3 metallo-beta-lactamase	core	AMR	AMR	BETA-LACTAM	BETA-LACTAM	HMM	291	293	94.54	68.2	283	WP_063842707.1	subclass B3 metallo-beta-lactamase	NF033105.1	subclass B3 metallo-beta-lactamase	3
GCA_039926995.1	Ferruginibacter sp.	MEO7489358.1	blaOXA	class D beta-lactamase	core	AMR	AMR	BETA-LACTAM	BETA-LACTAM	HMM	274	258	97.67	39.85	261	WP_004919358.1	class D beta-lactamase	NF012161.0	class D beta-lactamase	3
GCA_039927355.1	Ferruginibacter sp.	MEO7523795.1	blaOXA	class D beta-lactamase	core	AMR	AMR	BETA-LACTAM	BETA-LACTAM	HMM	273	289	98.27	35.62	292	WP_075071939.1	class D beta-lactamase	NF012161.0	class D beta-lactamase	3
GCA_039928035.1	Sediminibacterium sp.	MEO7531996.1	blaOXA	class D beta-lactamase	core	AMR	AMR	BETA-LACTAM	BETA-LACTAM	HMM	283	278	96.76	38.49	278	WP_032879257.1	class D beta-lactamase	NF012161.0	class D beta-lactamase	3
GCA_039927435.1	Ferruginibacter sp.	MEO7535594.1	bla	subclass B3 metallo-beta-lactamase	core	AMR	AMR	BETA-LACTAM	BETA-LACTAM	HMM	295	293	94.88	66.55	278	WP_063842707.1	subclass B3 metallo-beta-lactamase	NF033105.1	subclass B3 metallo-beta-lactamase	3
GCA_039927435.1	Ferruginibacter sp.	MEO7537414.1	arr	NAD(+)--rifampin ADP-ribosyltransferase	core	AMR	AMR	RIFAMYCIN	RIFAMYCIN	HMM	247	143	82.52	55.93	118	WP_063842202.1	NAD(+)--rifampin ADP-ribosyltransferase	NF033144.1	NAD(+)--rifampin ADP-ribosyltransferase	3
GCA_039927755.1	Ferruginibacter sp.	MEO7562802.1	blaOXA	class D beta-lactamase	core	AMR	AMR	BETA-LACTAM	BETA-LACTAM	HMM	272	258	97.67	41.44	263	WP_004919358.1	class D beta-lactamase	NF012161.0	class D beta-lactamase	2
GCA_039928175.1	Ferruginibacter sp.	MEO7584838.1	blaOXA	class D beta-lactamase	core	AMR	AMR	BETA-LACTAM	BETA-LACTAM	HMM	274	267	94.38	40.15	264	WP_003235647.1	class D beta-lactamase	NF012161.0	class D beta-lactamase	2
GCA_039927895.1	Chitinophagaceae bacterium	MEO7618441.1	blaOXA	class D beta-lactamase	core	AMR	AMR	BETA-LACTAM	BETA-LACTAM	HMM	270	271	89.3	40.89	247	WP_102607462.1	class D beta-lactamase	NF012161.0	class D beta-lactamase	2
GCA_039927895.1	Chitinophagaceae bacterium	MEO7621268.1	bla	BlaB/IND/MUS family subclass B1 metallo-beta-lactamase	core	AMR	AMR	BETA-LACTAM	BETA-LACTAM	HMM	244	241	95.44	56.9	232	WP_148044405.1	BlaB/IND/MUS family subclass B1 metallo-beta-lactamase	NF012146.1	BlaB/IND/MUS family subclass B1 metallo-beta-lactamase	2
GCA_039929325.1	Ferruginibacter sp.	MEO7763795.1	bla	class A beta-lactamase, subclass A2	core	AMR	AMR	BETA-LACTAM	BETA-LACTAM	HMM	298	304	98.68	58.67	300	WP_154469535.1	class A beta-lactamase, subclass A2	NF012099.1	class A beta-lactamase, subclass A2	1
GCA_039929165.1	Ginsengibacter sp.	MEO7800557.1	bla	subclass B3 metallo-beta-lactamase	core	AMR	AMR	BETA-LACTAM	BETA-LACTAM	HMM	296	293	97.61	59.93	287	WP_063842707.1	subclass B3 metallo-beta-lactamase	NF033105.1	subclass B3 metallo-beta-lactamase	1
GCA_039929165.1	Ginsengibacter sp.	MEO7802653.1	blaOXA	class D beta-lactamase	core	AMR	AMR	BETA-LACTAM	BETA-LACTAM	HMM	274	263	96.96	39	259	WP_063864080.1	class D beta-lactamase	NF012161.0	class D beta-lactamase	2
GCA_039930245.1	Chitinophagaceae bacterium	MEO7922689.1	bla	BlaB/IND/MUS family subclass B1 metallo-beta-lactamase	core	AMR	AMR	BETA-LACTAM	BETA-LACTAM	HMM	240	241	98.34	59.07	237	WP_148044405.1	BlaB/IND/MUS family subclass B1 metallo-beta-lactamase	NF012146.1	BlaB/IND/MUS family subclass B1 metallo-beta-lactamase	2
GCA_039931355.1	Ginsengibacter sp.	MEO8109873.1	blaOXA	class D beta-lactamase	core	AMR	AMR	BETA-LACTAM	BETA-LACTAM	HMM	270	278	97.84	36.92	279	WP_032865068.1	class D beta-lactamase	NF012161.0	class D beta-lactamase	2
GCA_039931355.1	Ginsengibacter sp.	MEO8109905.1	bla	subclass B3 metallo-beta-lactamase	core	AMR	AMR	BETA-LACTAM	BETA-LACTAM	HMM	292	289	99.65	69.44	288	WP_041884311.1	subclass B3 metallo-beta-lactamase	NF033105.1	subclass B3 metallo-beta-lactamase	2
GCA_039931355.1	Ginsengibacter sp.	MEO8112000.1	arr	NAD(+)--rifampin ADP-ribosyltransferase	core	AMR	AMR	RIFAMYCIN	RIFAMYCIN	HMM	247	150	90.67	46.32	136	WP_052238312.1	NAD(+)--rifampin ADP-ribosyltransferase	NF033144.1	NAD(+)--rifampin ADP-ribosyltransferase	1
GCA_039932855.1	Chitinophagaceae bacterium	MEO8403436.1	arr	NAD(+)--rifampin ADP-ribosyltransferase	core	AMR	AMR	RIFAMYCIN	RIFAMYCIN	HMM	142	150	96.67	55.86	145	WP_033959319.1	NAD(+)--rifampin ADP-ribosyltransferase	NF033144.1	NAD(+)--rifampin ADP-ribosyltransferase	4
GCA_039933035.1	Ginsengibacter sp.	MEO8413095.1	arr	NAD(+)--rifampin ADP-ribosyltransferase	core	AMR	AMR	RIFAMYCIN	RIFAMYCIN	HMM	148	137	94.89	58.46	130	WP_012695486.1	NAD(+)--rifampin ADP-ribosyltransferase	NF033144.1	NAD(+)--rifampin ADP-ribosyltransferase	4
GCA_039933035.1	Ginsengibacter sp.	MEO8414934.1	blaOXA	class D beta-lactamase	core	AMR	AMR	BETA-LACTAM	BETA-LACTAM	HMM	269	274	100	38.27	277	WP_004295324.1	class D beta-lactamase	NF012161.0	class D beta-lactamase	4
GCA_039933035.1	Ginsengibacter sp.	MEO8415802.1	bla	subclass B3 metallo-beta-lactamase	core	AMR	AMR	BETA-LACTAM	BETA-LACTAM	HMM	295	293	98.29	66.44	289	WP_063842707.1	subclass B3 metallo-beta-lactamase	NF033105.1	subclass B3 metallo-beta-lactamase	4
GCA_039934215.1	Ginsengibacter sp.	MEO8569270.1	blaOXA	class D beta-lactamase	core	AMR	AMR	BETA-LACTAM	BETA-LACTAM	HMM	250	274	86.86	40.98	244	WP_004295324.1	class D beta-lactamase	NF012161.0	class D beta-lactamase	3
GCA_039934215.1	Ginsengibacter sp.	MEO8569897.1	arr	NAD(+)--rifampin ADP-ribosyltransferase	core	AMR	AMR	RIFAMYCIN	RIFAMYCIN	HMM	81	137	58.39	57.5	80	WP_012695486.1	NAD(+)--rifampin ADP-ribosyltransferase	NF033144.1	NAD(+)--rifampin ADP-ribosyltransferase	3
GCA_039934515.1	Ginsengibacter sp.	MEO8765063.1	blaOXA	class D beta-lactamase	core	AMR	AMR	BETA-LACTAM	BETA-LACTAM	HMM	270	274	97.08	38.15	270	WP_004295324.1	class D beta-lactamase	NF012161.0	class D beta-lactamase	3
GCA_039934515.1	Ginsengibacter sp.	MEO8765496.1	bla	BlaB/IND/MUS family subclass B1 metallo-beta-lactamase	core	AMR	AMR	BETA-LACTAM	BETA-LACTAM	HMM	241	241	92.53	53.12	224	WP_148044405.1	BlaB/IND/MUS family subclass B1 metallo-beta-lactamase	NF012146.1	BlaB/IND/MUS family subclass B1 metallo-beta-lactamase	2
GCA_039934735.1	Ferruginibacter sp.	MEO8769637.1	bla	BlaB/IND/MUS family subclass B1 metallo-beta-lactamase	core	AMR	AMR	BETA-LACTAM	BETA-LACTAM	HMM	245	241	99.17	59.17	240	WP_148044405.1	BlaB/IND/MUS family subclass B1 metallo-beta-lactamase	NF012146.1	BlaB/IND/MUS family subclass B1 metallo-beta-lactamase	2
GCA_039934735.1	Ferruginibacter sp.	MEO8770438.1	blaOXA	class D beta-lactamase	core	AMR	AMR	BETA-LACTAM	BETA-LACTAM	HMM	272	262	98.09	39.26	270	WP_041816295.1	class D beta-lactamase	NF012161.0	class D beta-lactamase	1
GCA_039935135.1	Ginsengibacter sp.	MEO8824172.1	bla	subclass B1 metallo-beta-lactamase	core	AMR	AMR	BETA-LACTAM	BETA-LACTAM	HMM	273	266	97.74	53.64	261	WP_081048762.1	subclass B1 metallo-beta-lactamase	NF033088.2	subclass B1 metallo-beta-lactamase	2
GCA_039935555.1	Ginsengibacter sp.	MEO8862258.1	blaOXA	class D beta-lactamase	core	AMR	AMR	BETA-LACTAM	BETA-LACTAM	HMM	300	274	98.54	39.19	273	WP_004295324.1	class D beta-lactamase	NF012161.0	class D beta-lactamase	2
GCA_039936775.1	Ginsengibacter sp.	MEO9032598.1	blaOXA	class D beta-lactamase	core	AMR	AMR	BETA-LACTAM	BETA-LACTAM	HMM	300	274	98.54	39.19	273	WP_004295324.1	class D beta-lactamase	NF012161.0	class D beta-lactamase	1
GCA_039937195.1	Ginsengibacter sp.	MEO9069896.1	bla	class A beta-lactamase, subclass A2	core	AMR	AMR	BETA-LACTAM	BETA-LACTAM	HMM	297	303	94.72	58.19	287	WP_041881964.1	class A beta-lactamase, subclass A2	NF012099.1	class A beta-lactamase, subclass A2	1
GCA_039937195.1	Ginsengibacter sp.	MEO9070227.1	arr	NAD(+)--rifampin ADP-ribosyltransferase	core	AMR	AMR	RIFAMYCIN	RIFAMYCIN	HMM	149	143	96.5	55.07	138	WP_063842202.1	NAD(+)--rifampin ADP-ribosyltransferase	NF033144.1	NAD(+)--rifampin ADP-ribosyltransferase	2
GCA_039937195.1	Ginsengibacter sp.	MEO9071109.1	bla	subclass B3 metallo-beta-lactamase	core	AMR	AMR	BETA-LACTAM	BETA-LACTAM	HMM	291	293	99.66	63.7	292	WP_063842707.1	subclass B3 metallo-beta-lactamase	NF033105.1	subclass B3 metallo-beta-lactamase	2
GCA_040002335.1	Parafilimonas sp.	MEP6465276.1	bla	subclass B3 metallo-beta-lactamase	core	AMR	AMR	BETA-LACTAM	BETA-LACTAM	HMM	295	290	99.31	59.52	294	WP_078675023.1	subclass B3 metallo-beta-lactamase	NF033105.1	subclass B3 metallo-beta-lactamase	1
GCA_040002495.1	Ferruginibacter sp.	MEP6553076.1	blaOXA	class D beta-lactamase	core	AMR	AMR	BETA-LACTAM	BETA-LACTAM	HMM	274	280	95.36	36.86	274	WP_081401608.1	class D beta-lactamase	NF012161.0	class D beta-lactamase	1
GCA_040002495.1	Ferruginibacter sp.	MEP6555150.1	bla	subclass B3 metallo-beta-lactamase	core	AMR	AMR	BETA-LACTAM	BETA-LACTAM	HMM	291	293	97.27	64.21	285	WP_063842707.1	subclass B3 metallo-beta-lactamase	NF033105.1	subclass B3 metallo-beta-lactamase	1
GCA_040002495.1	Ferruginibacter sp.	MEP6556653.1	arr	NAD(+)--rifampin ADP-ribosyltransferase	core	AMR	AMR	RIFAMYCIN	RIFAMYCIN	HMM	145	137	95.62	57.25	131	WP_012695486.1	NAD(+)--rifampin ADP-ribosyltransferase	NF033144.1	NAD(+)--rifampin ADP-ribosyltransferase	1
GCA_040002575.1	Ginsengibacter sp.	MEP6584235.1	blaOXA	class D beta-lactamase	core	AMR	AMR	BETA-LACTAM	BETA-LACTAM	HMM	270	274	100	38.71	279	WP_004295324.1	class D beta-lactamase	NF012161.0	class D beta-lactamase	3
GCA_040002575.1	Ginsengibacter sp.	MEP6584462.1	arr	NAD(+)--rifampin ADP-ribosyltransferase	core	AMR	AMR	RIFAMYCIN	RIFAMYCIN	HMM	170	137	94.16	59.69	129	WP_012695486.1	NAD(+)--rifampin ADP-ribosyltransferase	NF033144.1	NAD(+)--rifampin ADP-ribosyltransferase	3
GCA_040002575.1	Ginsengibacter sp.	MEP6584828.1	bla	subclass B3 metallo-beta-lactamase	core	AMR	AMR	BETA-LACTAM	BETA-LACTAM	HMM	293	293	95.22	69.53	279	WP_063842707.1	subclass B3 metallo-beta-lactamase	NF033105.1	subclass B3 metallo-beta-lactamase	3
GCA_040003135.1	Ginsengibacter sp.	MEP6596453.1	blaOXA	class D beta-lactamase	core	AMR	AMR	BETA-LACTAM	BETA-LACTAM	HMM	272	267	79.78	44.89	225	WP_003235647.1	class D beta-lactamase	NF012161.0	class D beta-lactamase	2
GCA_040003595.1	Ginsengibacter sp.	MEP6627679.1	bla	subclass B1 metallo-beta-lactamase	core	AMR	AMR	BETA-LACTAM	BETA-LACTAM	HMM	249	253	99.21	70.12	251	WP_119059468.1	subclass B1 metallo-beta-lactamase	NF033088.2	subclass B1 metallo-beta-lactamase	2
GCA_040003235.1	Ferruginibacter sp.	MEP6674076.1	arr	NAD(+)--rifampin ADP-ribosyltransferase	core	AMR	AMR	RIFAMYCIN	RIFAMYCIN	HMM	134	150	76	55.26	114	WP_033959319.1	NAD(+)--rifampin ADP-ribosyltransferase	NF033144.1	NAD(+)--rifampin ADP-ribosyltransferase	1
GCA_040003235.1	Ferruginibacter sp.	MEP6675693.1	blaOXA	class D beta-lactamase	core	AMR	AMR	BETA-LACTAM	BETA-LACTAM	HMM	271	262	96.95	38.43	268	WP_041816295.1	class D beta-lactamase	NF012161.0	class D beta-lactamase	2
GCA_040003235.1	Ferruginibacter sp.	MEP6676938.1	bla	BlaB/IND/MUS family subclass B1 metallo-beta-lactamase	core	AMR	AMR	BETA-LACTAM	BETA-LACTAM	HMM	243	241	99.17	57.92	240	WP_148044405.1	BlaB/IND/MUS family subclass B1 metallo-beta-lactamase	NF012146.1	BlaB/IND/MUS family subclass B1 metallo-beta-lactamase	2
GCA_040003235.1	Ferruginibacter sp.	MEP6677527.1	arr	NAD(+)--rifampin ADP-ribosyltransferase	core	AMR	AMR	RIFAMYCIN	RIFAMYCIN	HMM	136	137	91.97	49.61	127	WP_012695486.1	NAD(+)--rifampin ADP-ribosyltransferase	NF033144.1	NAD(+)--rifampin ADP-ribosyltransferase	2
GCA_040003235.1	Ferruginibacter sp.	MEP6677575.1	bla	BlaB/IND/MUS family subclass B1 metallo-beta-lactamase	core	AMR	AMR	BETA-LACTAM	BETA-LACTAM	HMM	245	241	100	59.5	242	WP_148044405.1	BlaB/IND/MUS family subclass B1 metallo-beta-lactamase	NF012146.1	BlaB/IND/MUS family subclass B1 metallo-beta-lactamase	2
GCA_040003735.1	Parafilimonas sp.	MEP6683553.1	bla	subclass B3 metallo-beta-lactamase	core	AMR	AMR	BETA-LACTAM	BETA-LACTAM	HMM	295	289	97.58	59.57	282	WP_041884311.1	subclass B3 metallo-beta-lactamase	NF033105.1	subclass B3 metallo-beta-lactamase	4
GCA_040003485.1	Ferruginibacter sp.	MEP6710887.1	blaOXA	class D beta-lactamase	core	AMR	AMR	BETA-LACTAM	BETA-LACTAM	HMM	274	285	99.65	36.46	288	WP_077564355.1	class D beta-lactamase	NF012161.0	class D beta-lactamase	4
GCA_040005015.1	Panacibacter sp.	MEP6846396.1	bla	subclass B3 metallo-beta-lactamase	core	AMR	AMR	BETA-LACTAM	BETA-LACTAM	HMM	292	293	95.22	67.74	279	WP_063842707.1	subclass B3 metallo-beta-lactamase	NF033105.1	subclass B3 metallo-beta-lactamase	4
GCA_040005535.1	Ginsengibacter sp.	MEP6928050.1	blaOXA	class D beta-lactamase	core	AMR	AMR	BETA-LACTAM	BETA-LACTAM	HMM	270	274	100	37.63	279	WP_004295324.1	class D beta-lactamase	NF012161.0	class D beta-lactamase	4
GCA_040005125.1	Ginsengibacter sp.	MEP6951587.1	bla	subclass B3 metallo-beta-lactamase	core	AMR	AMR	BETA-LACTAM	BETA-LACTAM	HMM	291	293	94.54	68.95	277	WP_063842707.1	subclass B3 metallo-beta-lactamase	NF033105.1	subclass B3 metallo-beta-lactamase	2
GCA_040006615.1	Ferruginibacter sp.	MEP7106457.1	bla	subclass B3 metallo-beta-lactamase	core	AMR	AMR	BETA-LACTAM	BETA-LACTAM	HMM	329	293	97.95	64.73	292	WP_063842707.1	subclass B3 metallo-beta-lactamase	NF033105.1	subclass B3 metallo-beta-lactamase	2
GCA_040006615.1	Ferruginibacter sp.	MEP7110432.1	blaOXA	class D beta-lactamase	core	AMR	AMR	BETA-LACTAM	BETA-LACTAM	HMM	274	268	92.54	39	259	WP_003328240.1	class D beta-lactamase	NF012161.0	class D beta-lactamase	1
GCA_040007015.1	Ferruginibacter sp.	MEP7142188.1	blaOXA	class D beta-lactamase	core	AMR	AMR	BETA-LACTAM	BETA-LACTAM	HMM	272	258	97.67	39.16	263	WP_004919358.1	class D beta-lactamase	NF012161.0	class D beta-lactamase	1
GCA_040007015.1	Ferruginibacter sp.	MEP7144806.1	bla	BlaB/IND/MUS family subclass B1 metallo-beta-lactamase	core	AMR	AMR	BETA-LACTAM	BETA-LACTAM	HMM	255	241	97.1	60.43	235	WP_148044405.1	BlaB/IND/MUS family subclass B1 metallo-beta-lactamase	NF012146.1	BlaB/IND/MUS family subclass B1 metallo-beta-lactamase	3
GCA_040006715.1	Ferruginibacter sp.	MEP7163895.1	blaOXA	class D beta-lactamase	core	AMR	AMR	BETA-LACTAM	BETA-LACTAM	HMM	274	258	93.8	41.43	251	WP_004919358.1	class D beta-lactamase	NF012161.0	class D beta-lactamase	3
GCA_040006715.1	Ferruginibacter sp.	MEP7165879.1	bla	BlaB/IND/MUS family subclass B1 metallo-beta-lactamase	core	AMR	AMR	BETA-LACTAM	BETA-LACTAM	HMM	245	241	100	57.02	242	WP_148044405.1	BlaB/IND/MUS family subclass B1 metallo-beta-lactamase	NF012146.1	BlaB/IND/MUS family subclass B1 metallo-beta-lactamase	3
GCA_040007435.1	Ginsengibacter sp.	MEP7230610.1	blaOXA	class D beta-lactamase	core	AMR	AMR	BETA-LACTAM	BETA-LACTAM	HMM	250	274	86.86	40.5	242	WP_004295324.1	class D beta-lactamase	NF012161.0	class D beta-lactamase	1
GCA_040007435.1	Ginsengibacter sp.	MEP7230883.1	arsN1	arsinothricin resistance N-acetyltransferase ArsN1 family B	plus	STRESS	METAL	ARSENIC	ARSENIC	HMM	187	186	95.16	46.89	177	AAN67541.1	arsinothricin resistance N-acetyltransferase ArsN1 family B	NF040504.1	arsinothricin resistance N-acetyltransferase ArsN1 family B	4
GCA_040007435.1	Ginsengibacter sp.	MEP7231946.1	bla	subclass B3 metallo-beta-lactamase	core	AMR	AMR	BETA-LACTAM	BETA-LACTAM	HMM	294	289	99.65	64.24	288	WP_041884311.1	subclass B3 metallo-beta-lactamase	NF033105.1	subclass B3 metallo-beta-lactamase	4
GCA_040007435.1	Ginsengibacter sp.	MEP7232262.1	arsN2	arsenic resistance N-acetyltransferase ArsN2	plus	STRESS	METAL	ARSENIC	ARSENIC	HMM	149	142	100	35.21	142	ABB05616.1	arsenic resistance N-acetyltransferase ArsN2	NF040501.1	arsenic resistance N-acetyltransferase ArsN2	4
GCA_040007235.1	Ferruginibacter sp.	MEP7236340.1	bla	BlaB/IND/MUS family subclass B1 metallo-beta-lactamase	core	AMR	AMR	BETA-LACTAM	BETA-LACTAM	HMM	244	241	99.59	55.6	241	WP_148044405.1	BlaB/IND/MUS family subclass B1 metallo-beta-lactamase	NF012146.1	BlaB/IND/MUS family subclass B1 metallo-beta-lactamase	4
GCA_040007325.1	Ginsengibacter sp.	MEP7251268.1	blaOXA	class D beta-lactamase	core	AMR	AMR	BETA-LACTAM	BETA-LACTAM	HMM	269	274	100	37.41	278	WP_004295324.1	class D beta-lactamase	NF012161.0	class D beta-lactamase	1
GCA_040007325.1	Ginsengibacter sp.	MEP7252202.1	bla	subclass B3 metallo-beta-lactamase	core	AMR	AMR	BETA-LACTAM	BETA-LACTAM	HMM	294	293	96.25	64.21	285	WP_063842707.1	subclass B3 metallo-beta-lactamase	NF033105.1	subclass B3 metallo-beta-lactamase	2
GCA_040007325.1	Ginsengibacter sp.	MEP7253548.1	arsN2	arsenic resistance N-acetyltransferase ArsN2	plus	STRESS	METAL	ARSENIC	ARSENIC	HMM	148	142	98.59	36.43	140	ABB05616.1	arsenic resistance N-acetyltransferase ArsN2	NF040501.1	arsenic resistance N-acetyltransferase ArsN2	2
GCA_040007795.1	Ferruginibacter sp.	MEP7256469.1	bla	BlaB/IND/MUS family subclass B1 metallo-beta-lactamase	core	AMR	AMR	BETA-LACTAM	BETA-LACTAM	HMM	245	241	99.17	59.17	240	WP_148044405.1	BlaB/IND/MUS family subclass B1 metallo-beta-lactamase	NF012146.1	BlaB/IND/MUS family subclass B1 metallo-beta-lactamase	1
GCA_040007795.1	Ferruginibacter sp.	MEP7256675.1	blaOXA	class D beta-lactamase	core	AMR	AMR	BETA-LACTAM	BETA-LACTAM	HMM	272	267	85.39	44.68	235	WP_003235647.1	class D beta-lactamase	NF012161.0	class D beta-lactamase	2
GCA_040007215.1	Flavitalea sp.	MEP7259251.1	arr	NAD(+)--rifampin ADP-ribosyltransferase	core	AMR	AMR	RIFAMYCIN	RIFAMYCIN	HMM	145	143	96.5	55.07	138	WP_063842202.1	NAD(+)--rifampin ADP-ribosyltransferase	NF033144.1	NAD(+)--rifampin ADP-ribosyltransferase	2
GCA_040007815.1	Chitinophagaceae bacterium	MEP7373206.1	arr	NAD(+)--rifampin ADP-ribosyltransferase	core	AMR	AMR	RIFAMYCIN	RIFAMYCIN	HMM	247	143	82.52	53.39	118	WP_063842202.1	NAD(+)--rifampin ADP-ribosyltransferase	NF033144.1	NAD(+)--rifampin ADP-ribosyltransferase	3
GCA_040007815.1	Chitinophagaceae bacterium	MEP7373336.1	blaOXA	class D beta-lactamase	core	AMR	AMR	BETA-LACTAM	BETA-LACTAM	HMM	271	276	98.19	39.21	278	WP_070064536.1	class D beta-lactamase	NF012161.0	class D beta-lactamase	3
GCA_040007815.1	Chitinophagaceae bacterium	MEP7375834.1	bla	subclass B3 metallo-beta-lactamase	core	AMR	AMR	BETA-LACTAM	BETA-LACTAM	HMM	295	293	96.25	66.31	282	WP_063842707.1	subclass B3 metallo-beta-lactamase	NF033105.1	subclass B3 metallo-beta-lactamase	3
GCA_040007815.1	Chitinophagaceae bacterium	MEP7376549.1	arsN1	arsinothricin resistance N-acetyltransferase ArsN1 family B	plus	STRESS	METAL	ARSENIC	ARSENIC	HMM	188	186	91.4	47.06	170	AAN67541.1	arsinothricin resistance N-acetyltransferase ArsN1 family B	NF040504.1	arsinothricin resistance N-acetyltransferase ArsN1 family B	3
GCA_040079375.1	Ferruginibacter sp.	MEQ1553598.1	blaOXA	class D beta-lactamase	core	AMR	AMR	BETA-LACTAM	BETA-LACTAM	HMM	271	280	98.93	35.92	284	WP_063862810.1	class D beta-lactamase	NF012161.0	class D beta-lactamase	3
GCA_040080515.1	Chitinophagaceae bacterium	MEQ1675267.1	bla	BlaB/IND/MUS family subclass B1 metallo-beta-lactamase	core	AMR	AMR	BETA-LACTAM	BETA-LACTAM	HMM	245	241	98.76	55.83	240	WP_148044405.1	BlaB/IND/MUS family subclass B1 metallo-beta-lactamase	NF012146.1	BlaB/IND/MUS family subclass B1 metallo-beta-lactamase	3
GCA_040080515.1	Chitinophagaceae bacterium	MEQ1676993.1	arsN2	arsenic resistance N-acetyltransferase ArsN2	plus	STRESS	METAL	ARSENIC	ARSENIC	HMM	229	144	97.22	39.86	143	KTT96020.1	arsenic resistance N-acetyltransferase ArsN2	NF040501.1	arsenic resistance N-acetyltransferase ArsN2	1
GCA_040081135.1	Lacibacter sp.	MEQ1796807.1	bla	BlaB/IND/MUS family subclass B1 metallo-beta-lactamase	core	AMR	AMR	BETA-LACTAM	BETA-LACTAM	HMM	242	248	95.16	56.9	239	WP_012025466.1	BlaB/IND/MUS family subclass B1 metallo-beta-lactamase	NF012146.1	BlaB/IND/MUS family subclass B1 metallo-beta-lactamase	2
GCA_040081135.1	Lacibacter sp.	MEQ1799531.1	blaOXA	class D beta-lactamase	core	AMR	AMR	BETA-LACTAM	BETA-LACTAM	HMM	269	285	80.7	40.6	234	WP_058375744.1	class D beta-lactamase	NF012161.0	class D beta-lactamase	2
GCA_040348765.1	Chitinophagaceae bacterium	MES1198045.1	blaOXA	class D beta-lactamase	core	AMR	AMR	BETA-LACTAM	BETA-LACTAM	HMM	269	258	94.19	40.94	254	WP_004919358.1	class D beta-lactamase	NF012161.0	class D beta-lactamase	3
GCA_040508255.1	Flavitalea sp.	MET0243171.1	bla	subclass B3 metallo-beta-lactamase	core	AMR	AMR	BETA-LACTAM	BETA-LACTAM	HMM	295	290	97.24	61.13	283	WP_063857696.1	subclass B3 metallo-beta-lactamase	NF033105.1	subclass B3 metallo-beta-lactamase	3
GCA_040509055.1	Chitinophagaceae bacterium	MET0391761.1	arr	NAD(+)--rifampin ADP-ribosyltransferase	core	AMR	AMR	RIFAMYCIN	RIFAMYCIN	HMM	144	137	96.35	56.82	132	WP_012695486.1	NAD(+)--rifampin ADP-ribosyltransferase	NF033144.1	NAD(+)--rifampin ADP-ribosyltransferase	3
GCA_040509055.1	Chitinophagaceae bacterium	MET0393771.1	blaOXA	class D beta-lactamase	core	AMR	AMR	BETA-LACTAM	BETA-LACTAM	HMM	270	258	95.74	40.93	259	WP_004919358.1	class D beta-lactamase	NF012161.0	class D beta-lactamase	2
GCA_040509495.1	Chitinophagaceae bacterium	MET0461670.1	bla	class A beta-lactamase	core	AMR	AMR	BETA-LACTAM	BETA-LACTAM	HMM	301	299	96.66	38.98	295	WP_065825678.1	class A beta-lactamase	NF033103.1	class A beta-lactamase	2
GCA_040509495.1	Chitinophagaceae bacterium	MET0464292.1	arr	NAD(+)--rifampin ADP-ribosyltransferase	core	AMR	AMR	RIFAMYCIN	RIFAMYCIN	HMM	152	137	94.16	58.91	129	WP_012695486.1	NAD(+)--rifampin ADP-ribosyltransferase	NF033144.1	NAD(+)--rifampin ADP-ribosyltransferase	3
GCA_040509495.1	Chitinophagaceae bacterium	MET0465436.1	bla	subclass B3 metallo-beta-lactamase	core	AMR	AMR	BETA-LACTAM	BETA-LACTAM	HMM	296	293	94.54	57.09	282	WP_063842707.1	subclass B3 metallo-beta-lactamase	NF033105.1	subclass B3 metallo-beta-lactamase	3
GCA_040510375.1	Chitinophagaceae bacterium	MET0634672.1	bla	subclass B3 metallo-beta-lactamase	core	AMR	AMR	BETA-LACTAM	BETA-LACTAM	HMM	272	300	88	68.18	264	WP_063842717.1	subclass B3 metallo-beta-lactamase	NF033105.1	subclass B3 metallo-beta-lactamase	3
GCA_040544575.1	Chitinophaga ginsengisegetis	MET3396406.1	blaOXA	class D beta-lactamase	core	AMR	AMR	BETA-LACTAM	BETA-LACTAM	HMM	269	266	96.62	37.4	262	WP_032490445.1	class D beta-lactamase	NF012161.0	class D beta-lactamase	5
GCA_040544575.1	Chitinophaga ginsengisegetis	MET3399235.1	aadS	AadS family aminoglycoside 6-adenylyltransferase	core	AMR	AMR	AMINOGLYCOSIDE	STREPTOMYCIN	HMM	291	287	99.65	63.99	286	WP_003013318.1	AadS family aminoglycoside 6-adenylyltransferase	NF033387.1	AadS family aminoglycoside 6-adenylyltransferase	5
GCA_040544575.1	Chitinophaga ginsengisegetis	MET3400154.1	bla	subclass B1 metallo-beta-lactamase	core	AMR	AMR	BETA-LACTAM	BETA-LACTAM	HMM	252	253	100	73.91	253	WP_119059468.1	subclass B1 metallo-beta-lactamase	NF033088.2	subclass B1 metallo-beta-lactamase	5
GCA_040544575.1	Chitinophaga ginsengisegetis	MET3400207.1	bla	class A beta-lactamase	core	AMR	AMR	BETA-LACTAM	BETA-LACTAM	HMM	299	319	86.52	47.29	277	WP_063842272.1	class A beta-lactamase	NF033103.1	class A beta-lactamase	5
GCA_040544575.1	Chitinophaga ginsengisegetis	MET3400872.1	arr	NAD(+)--rifampin ADP-ribosyltransferase	core	AMR	AMR	RIFAMYCIN	RIFAMYCIN	HMM	143	143	89.51	60.16	128	WP_063842202.1	NAD(+)--rifampin ADP-ribosyltransferase	NF033144.1	NAD(+)--rifampin ADP-ribosyltransferase	5
GCA_040544575.1	Chitinophaga ginsengisegetis	MET3401880.1	bla	BlaB/IND/MUS family subclass B1 metallo-beta-lactamase	core	AMR	AMR	BETA-LACTAM	BETA-LACTAM	HMM	241	237	99.16	45.64	241	WP_063864592.1	BlaB/IND/MUS family subclass B1 metallo-beta-lactamase	NF012146.1	BlaB/IND/MUS family subclass B1 metallo-beta-lactamase	1
GCA_040546735.1	Chitinophaga sp. OAE865	MET3875032.1	blaOXA	class D beta-lactamase	core	AMR	AMR	BETA-LACTAM	BETA-LACTAM	HMM	267	248	98.39	38.76	258	WP_109545084.1	class D beta-lactamase	NF012161.0	class D beta-lactamase	2
GCA_040546735.1	Chitinophaga sp. OAE865	MET3879124.1	arr	NAD(+)--rifampin ADP-ribosyltransferase	core	AMR	AMR	RIFAMYCIN	RIFAMYCIN	HMM	141	137	100	58.87	141	WP_012695486.1	NAD(+)--rifampin ADP-ribosyltransferase	NF033144.1	NAD(+)--rifampin ADP-ribosyltransferase	2
GCA_040546735.1	Chitinophaga sp. OAE865	MET3879918.1	bla	class A beta-lactamase	core	AMR	AMR	BETA-LACTAM	BETA-LACTAM	HMM	299	319	84.95	49.26	272	WP_063842272.1	class A beta-lactamase	NF033103.1	class A beta-lactamase	1
GCA_040546735.1	Chitinophaga sp. OAE865	MET3879939.1	bla	subclass B1 metallo-beta-lactamase	core	AMR	AMR	BETA-LACTAM	BETA-LACTAM	HMM	253	253	100	68.38	253	WP_119059468.1	subclass B1 metallo-beta-lactamase	NF033088.2	subclass B1 metallo-beta-lactamase	1
GCA_040546725.1	Niastella sp. OAS944	MET3884082.1	arsN2	arsenic resistance N-acetyltransferase ArsN2	plus	STRESS	METAL	ARSENIC	ARSENIC	HMM	142	147	85.03	38.46	130	ABG05788.1	arsenic resistance N-acetyltransferase ArsN2	NF040501.1	arsenic resistance N-acetyltransferase ArsN2	1
GCA_040546725.1	Niastella sp. OAS944	MET3886662.1	bla	subclass B3 metallo-beta-lactamase	core	AMR	AMR	BETA-LACTAM	BETA-LACTAM	HMM	288	294	95.58	57.54	285	WP_063842712.1	subclass B3 metallo-beta-lactamase	NF033105.1	subclass B3 metallo-beta-lactamase	2
GCA_040567655.1	Chitinophaga sp. H8	MET6999016.1	blaOXA	class D beta-lactamase	core	AMR	AMR	BETA-LACTAM	BETA-LACTAM	HMM	267	290	94.83	35.97	278	WP_087587940.1	class D beta-lactamase	NF012161.0	class D beta-lactamase	2
GCA_040567655.1	Chitinophaga sp. H8	MET7000282.1	aadS	AadS family aminoglycoside 6-adenylyltransferase	core	AMR	AMR	AMINOGLYCOSIDE	STREPTOMYCIN	HMM	295	287	98.95	62.68	284	WP_003013318.1	AadS family aminoglycoside 6-adenylyltransferase	NF033387.1	AadS family aminoglycoside 6-adenylyltransferase	2
GCA_040567655.1	Chitinophaga sp. H8	MET7001653.1	aadS	aminoglycoside 6-adenylyltransferase AadS	core	AMR	AMR	AMINOGLYCOSIDE	STREPTOMYCIN	EXACTP	287	287	100	100	287	WP_003013318.1	aminoglycoside 6-adenylyltransferase AadS	NF033387.1	AadS family aminoglycoside 6-adenylyltransferase	2
GCA_040567655.1	Chitinophaga sp. H8	MET7001654.1	catB	type B chloramphenicol O-acetyltransferase	core	AMR	AMR	PHENICOL	CHLORAMPHENICOL	HMM	209	210	97.62	73.66	205	WP_032492194.1	type B chloramphenicol O-acetyltransferase	NF000490.1	type B chloramphenicol O-acetyltransferase	1
GCA_040567655.1	Chitinophaga sp. H8	MET7001655.1	tet(X2)	tetracycline-inactivating monooxygenase Tet(X2)	core	AMR	AMR	TETRACYCLINE	TIGECYCLINE	BLASTP	388	388	100	99.74	388	WP_008651082.1	tetracycline-inactivating monooxygenase Tet(X2)	NF033111.2	tetracycline-inactivating monooxygenase Tet(X)	1
GCA_040567655.1	Chitinophaga sp. H8	MET7001656.1	catB	type B chloramphenicol O-acetyltransferase	core	AMR	AMR	PHENICOL	CHLORAMPHENICOL	HMM	209	210	97.62	73.66	205	WP_032492194.1	type B chloramphenicol O-acetyltransferase	NF000490.1	type B chloramphenicol O-acetyltransferase	2
GCA_040676135.1	Chitinophaga ginsengisegetis	MEV4882825.1	blaOXA	class D beta-lactamase	core	AMR	AMR	BETA-LACTAM	BETA-LACTAM	HMM	267	257	96.89	37.85	251	WP_128268284.1	class D beta-lactamase	NF012161.0	class D beta-lactamase	2
GCA_040676135.1	Chitinophaga ginsengisegetis	MEV4883983.1	aadS	AadS family aminoglycoside 6-adenylyltransferase	core	AMR	AMR	AMINOGLYCOSIDE	STREPTOMYCIN	HMM	291	287	99.65	62.94	286	WP_003013318.1	AadS family aminoglycoside 6-adenylyltransferase	NF033387.1	AadS family aminoglycoside 6-adenylyltransferase	3
GCA_040676135.1	Chitinophaga ginsengisegetis	MEV4886405.1	bla	subclass B1 metallo-beta-lactamase	core	AMR	AMR	BETA-LACTAM	BETA-LACTAM	HMM	252	253	100	74.31	253	WP_119059468.1	subclass B1 metallo-beta-lactamase	NF033088.2	subclass B1 metallo-beta-lactamase	3
GCA_040676135.1	Chitinophaga ginsengisegetis	MEV4886480.1	bla	class A beta-lactamase	core	AMR	AMR	BETA-LACTAM	BETA-LACTAM	HMM	287	319	86.52	47.29	277	WP_063842272.1	class A beta-lactamase	NF033103.1	class A beta-lactamase	3
GCA_040676135.1	Chitinophaga ginsengisegetis	MEV4887071.1	arr	NAD(+)--rifampin ADP-ribosyltransferase	core	AMR	AMR	RIFAMYCIN	RIFAMYCIN	HMM	143	143	89.51	60.16	128	WP_063842202.1	NAD(+)--rifampin ADP-ribosyltransferase	NF033144.1	NAD(+)--rifampin ADP-ribosyltransferase	1
GCA_040676135.1	Chitinophaga ginsengisegetis	MEV4887274.1	bla	BlaB/IND/MUS family subclass B1 metallo-beta-lactamase	core	AMR	AMR	BETA-LACTAM	BETA-LACTAM	HMM	241	237	99.16	46.06	241	WP_063864592.1	BlaB/IND/MUS family subclass B1 metallo-beta-lactamase	NF012146.1	BlaB/IND/MUS family subclass B1 metallo-beta-lactamase	2
GCA_041060425.1	Danxiaibacter flavus	MEX6688537.1	bla	BlaB/IND/MUS family subclass B1 metallo-beta-lactamase	core	AMR	AMR	BETA-LACTAM	BETA-LACTAM	HMM	241	237	98.73	57.38	237	WP_063864592.1	BlaB/IND/MUS family subclass B1 metallo-beta-lactamase	NF012146.1	BlaB/IND/MUS family subclass B1 metallo-beta-lactamase	2
GCA_041360695.1	Chitinophaga sp. RCC_12	MEZ2440464.1	bla	class A beta-lactamase	core	AMR	AMR	BETA-LACTAM	BETA-LACTAM	HMM	299	319	84.95	48.9	272	WP_063842272.1	class A beta-lactamase	NF033103.1	class A beta-lactamase	1
GCA_041360695.1	Chitinophaga sp. RCC_12	MEZ2441435.1	blaOXA	class D beta-lactamase	core	AMR	AMR	BETA-LACTAM	BETA-LACTAM	HMM	269	258	98.06	37.02	262	WP_004919358.1	class D beta-lactamase	NF012161.0	class D beta-lactamase	2
GCA_041360695.1	Chitinophaga sp. RCC_12	MEZ2443326.1	bla	BlaB/IND/MUS family subclass B1 metallo-beta-lactamase	core	AMR	AMR	BETA-LACTAM	BETA-LACTAM	HMM	241	237	98.31	48.12	239	WP_063864592.1	BlaB/IND/MUS family subclass B1 metallo-beta-lactamase	NF012146.1	BlaB/IND/MUS family subclass B1 metallo-beta-lactamase	2
GCA_041360695.1	Chitinophaga sp. RCC_12	MEZ2444616.1	bla	subclass B3 metallo-beta-lactamase	core	AMR	AMR	BETA-LACTAM	BETA-LACTAM	HMM	290	289	96.89	58.21	280	WP_041884311.1	subclass B3 metallo-beta-lactamase	NF033105.1	subclass B3 metallo-beta-lactamase	1
GCA_041392855.1	Flavipsychrobacter sp.	MEZ5015488.1	bla	subclass B1 metallo-beta-lactamase	core	AMR	AMR	BETA-LACTAM	BETA-LACTAM	HMM	244	246	97.97	37.25	247	WP_063860852.1	subclass B1 metallo-beta-lactamase	NF033088.2	subclass B1 metallo-beta-lactamase	1
GCA_041392935.1	Ferruginibacter sp.	MEZ5029090.1	blaOXA	class D beta-lactamase	core	AMR	AMR	BETA-LACTAM	BETA-LACTAM	HMM	272	262	98.85	38.91	275	WP_041816295.1	class D beta-lactamase	NF012161.0	class D beta-lactamase	1
GCA_041392925.1	Chitinophagaceae bacterium	MEZ5034742.1	arr	NAD(+)--rifampin ADP-ribosyltransferase	core	AMR	AMR	RIFAMYCIN	RIFAMYCIN	HMM	149	137	96.35	58.33	132	WP_012695486.1	NAD(+)--rifampin ADP-ribosyltransferase	NF033144.1	NAD(+)--rifampin ADP-ribosyltransferase	1
GCA_041392925.1	Chitinophagaceae bacterium	MEZ5034864.1	arsN1	arsinothricin resistance N-acetyltransferase ArsN1 family B	plus	STRESS	METAL	ARSENIC	ARSENIC	HMM	196	186	97.31	44.75	181	AAN67541.1	arsinothricin resistance N-acetyltransferase ArsN1 family B	NF040504.1	arsinothricin resistance N-acetyltransferase ArsN1 family B	2
GCA_041660405.1	Taibaiella sp.	MFA6057974.1	blaOXA	class D beta-lactamase	core	AMR	AMR	BETA-LACTAM	BETA-LACTAM	HMM	280	257	94.94	36.23	276	WP_109545113.1	class D beta-lactamase	NF012161.0	class D beta-lactamase	2
GCA_041660405.1	Taibaiella sp.	MFA6058417.1	ampC	class C beta-lactamase	core	AMR	AMR	BETA-LACTAM	BETA-LACTAM	HMM	402	609	58.13	53.67	354	WP_063839877.1	class C beta-lactamase	NF033085.1	class C beta-lactamase	1
GCA_041660405.1	Taibaiella sp.	MFA6058823.1	bla	BlaB/IND/MUS family subclass B1 metallo-beta-lactamase	core	AMR	AMR	BETA-LACTAM	BETA-LACTAM	HMM	248	248	93.95	51.48	237	WP_012025466.1	BlaB/IND/MUS family subclass B1 metallo-beta-lactamase	NF012146.1	BlaB/IND/MUS family subclass B1 metallo-beta-lactamase	1
GCA_041660405.1	Taibaiella sp.	MFA6060879.1	bla	class A beta-lactamase, subclass A2	core	AMR	AMR	BETA-LACTAM	BETA-LACTAM	HMM	314	301	89.37	52.04	269	WP_032494759.1	class A beta-lactamase, subclass A2	NF012099.1	class A beta-lactamase, subclass A2	1
GCA_041661485.1	Chitinophagaceae bacterium	MFA6151755.1	arr	NAD(+)--rifampin ADP-ribosyltransferase	core	AMR	AMR	RIFAMYCIN	RIFAMYCIN	HMM	247	143	90.21	53.49	129	WP_063842202.1	NAD(+)--rifampin ADP-ribosyltransferase	NF033144.1	NAD(+)--rifampin ADP-ribosyltransferase	1
GCA_041661485.1	Chitinophagaceae bacterium	MFA6151760.1	bla	class A beta-lactamase, subclass A2	core	AMR	AMR	BETA-LACTAM	BETA-LACTAM	HMM	296	303	93.73	51.41	284	WP_041881964.1	class A beta-lactamase, subclass A2	NF012099.1	class A beta-lactamase, subclass A2	2
GCA_042263525.1	Chitinophaga sp. Hz27	MFB6453965.1	bla	class A beta-lactamase	core	AMR	AMR	BETA-LACTAM	BETA-LACTAM	HMM	296	319	84.33	42.59	270	WP_063842272.1	class A beta-lactamase	NF033103.1	class A beta-lactamase	2
GCA_042263525.1	Chitinophaga sp. Hz27	MFB6456683.1	catB	type B chloramphenicol O-acetyltransferase	core	AMR	AMR	PHENICOL	CHLORAMPHENICOL	HMM	212	210	94.29	75.25	198	WP_063843229.1	type B chloramphenicol O-acetyltransferase	NF000490.1	type B chloramphenicol O-acetyltransferase	2
GCA_042434975.1	Terrimonas sp. R1	MFC0771764.1	arsN1	arsinothricin resistance N-acetyltransferase ArsN1 family B	plus	STRESS	METAL	ARSENIC	ARSENIC	HMM	197	186	92.47	44.19	172	AAN67541.1	arsinothricin resistance N-acetyltransferase ArsN1 family B	NF040504.1	arsinothricin resistance N-acetyltransferase ArsN1 family B	2
GCA_042434975.1	Terrimonas sp. R1	MFC0773789.1	arsN2	arsenic resistance N-acetyltransferase ArsN2	plus	STRESS	METAL	ARSENIC	ARSENIC	HMM	143	147	92.52	36.03	136	ABG05788.1	arsenic resistance N-acetyltransferase ArsN2	NF040501.1	arsenic resistance N-acetyltransferase ArsN2	4
GCA_042434975.1	Terrimonas sp. R1	MFC0776084.1	blaOXA	class D beta-lactamase	core	AMR	AMR	BETA-LACTAM	BETA-LACTAM	HMM	271	258	96.51	39.85	261	WP_004919358.1	class D beta-lactamase	NF012161.0	class D beta-lactamase	4
GCA_042434975.1	Terrimonas sp. R1	MFC0776302.1	arr	NAD(+)--rifampin ADP-ribosyltransferase	core	AMR	AMR	RIFAMYCIN	RIFAMYCIN	HMM	138	137	99.27	61.03	136	WP_012695486.1	NAD(+)--rifampin ADP-ribosyltransferase	NF033144.1	NAD(+)--rifampin ADP-ribosyltransferase	4
GCA_042649425.1	Niastella sp. GCM10012298	MFC3830101.1	bla	subclass B3 metallo-beta-lactamase	core	AMR	AMR	BETA-LACTAM	BETA-LACTAM	HMM	288	289	94.46	63.74	273	WP_041884311.1	subclass B3 metallo-beta-lactamase	NF033105.1	subclass B3 metallo-beta-lactamase	4
GCA_042649425.1	Niastella sp. GCM10012298	MFC3830636.1	arsN2	arsenic resistance N-acetyltransferase ArsN2	plus	STRESS	METAL	ARSENIC	ARSENIC	HMM	142	147	90.48	33.83	133	ABG05788.1	arsenic resistance N-acetyltransferase ArsN2	NF040501.1	arsenic resistance N-acetyltransferase ArsN2	4
GCA_042649305.1	Chitinophaga sp. GCM10012297	MFC3856206.1	bla	class A beta-lactamase, subclass A2	core	AMR	AMR	BETA-LACTAM	BETA-LACTAM	HMM	311	319	98.75	44.62	316	WP_063842272.1	class A beta-lactamase, subclass A2	NF012099.1	class A beta-lactamase, subclass A2	4
GCA_042649305.1	Chitinophaga sp. GCM10012297	MFC3856441.1	blaOXA	class D beta-lactamase	core	AMR	AMR	BETA-LACTAM	BETA-LACTAM	HMM	268	258	97.29	40.38	260	WP_004919358.1	class D beta-lactamase	NF012161.0	class D beta-lactamase	4
GCA_042651465.1	Ferruginibacter yonginensis	MFC4262558.1	blaOXA	class D beta-lactamase	core	AMR	AMR	BETA-LACTAM	BETA-LACTAM	HMM	272	267	82.77	43.83	235	WP_003235647.1	class D beta-lactamase	NF012161.0	class D beta-lactamase	4
GCA_042651465.1	Ferruginibacter yonginensis	MFC4262656.1	bla	BlaB/IND/MUS family subclass B1 metallo-beta-lactamase	core	AMR	AMR	BETA-LACTAM	BETA-LACTAM	HMM	245	248	98.39	56.15	244	WP_012025466.1	BlaB/IND/MUS family subclass B1 metallo-beta-lactamase	NF012146.1	BlaB/IND/MUS family subclass B1 metallo-beta-lactamase	1
GCA_042684465.1	Flavihumibacter stibioxidans	MFD2524289.1	bla	subclass B1 metallo-beta-lactamase	core	AMR	AMR	BETA-LACTAM	BETA-LACTAM	HMM	396	247	97.17	52.5	240	WP_013992183.1	subclass B1 metallo-beta-lactamase	NF033088.2	subclass B1 metallo-beta-lactamase	1
GCA_042684465.1	Flavihumibacter stibioxidans	MFD2527630.1	arsN2	arsenic resistance N-acetyltransferase ArsN2	plus	STRESS	METAL	ARSENIC	ARSENIC	HMM	148	142	99.3	36.17	141	ABB05616.1	arsenic resistance N-acetyltransferase ArsN2	NF040501.1	arsenic resistance N-acetyltransferase ArsN2	1
GCA_042684425.1	Haoranjiania flava	MFD2574987.1	aph(3')	APH(3') family aminoglycoside O-phosphotransferase	core	AMR	AMR	AMINOGLYCOSIDE	AMINOGLYCOSIDE	HMM	262	264	96.59	32.3	257	WP_001096887.1	APH(3') family aminoglycoside O-phosphotransferase	NF033068.1	APH(3') family aminoglycoside O-phosphotransferase	1
GCA_042684425.1	Haoranjiania flava	MFD2574998.1	aadS	AadS family aminoglycoside 6-adenylyltransferase	core	AMR	AMR	AMINOGLYCOSIDE	STREPTOMYCIN	HMM	285	287	98.95	60.56	284	WP_003013318.1	AadS family aminoglycoside 6-adenylyltransferase	NF033387.1	AadS family aminoglycoside 6-adenylyltransferase	1
GCA_042684425.1	Haoranjiania flava	MFD2575865.1	arr	NAD(+)--rifampin ADP-ribosyltransferase	core	AMR	AMR	RIFAMYCIN	RIFAMYCIN	HMM	146	137	93.43	57.81	128	WP_012695486.1	NAD(+)--rifampin ADP-ribosyltransferase	NF033144.1	NAD(+)--rifampin ADP-ribosyltransferase	2
GCA_042684425.1	Haoranjiania flava	MFD2577122.1	qacC	quaternary ammonium compound efflux SMR transporter QacC	core	STRESS	BIOCIDE	QUATERNARY AMMONIUM	QUATERNARY AMMONIUM	EXACTP	107	107	100	100	107	WP_001146389.1	quaternary ammonium compound efflux SMR transporter QacC	NF000023.1	quaternary ammonium compound efflux SMR transporter QacC	2
GCA_042686315.1	Chitinophaga cymbidii	MFD2889766.1	blaOXA	class D beta-lactamase	core	AMR	AMR	BETA-LACTAM	BETA-LACTAM	HMM	267	289	83.04	42.8	243	WP_075071939.1	class D beta-lactamase	NF012161.0	class D beta-lactamase	4
GCA_042686315.1	Chitinophaga cymbidii	MFD2890096.1	bla	class A beta-lactamase, subclass A2	core	AMR	AMR	BETA-LACTAM	BETA-LACTAM	HMM	310	319	95.61	43.14	306	WP_063842272.1	class A beta-lactamase, subclass A2	NF012099.1	class A beta-lactamase, subclass A2	4
GCA_042686025.1	Terrimonas rubra	MFD2920558.1	bla	subclass B1 metallo-beta-lactamase	core	AMR	AMR	BETA-LACTAM	BETA-LACTAM	HMM	247	253	98.02	52.82	248	WP_119059468.1	subclass B1 metallo-beta-lactamase	NF033088.2	subclass B1 metallo-beta-lactamase	4
GCA_042686025.1	Terrimonas rubra	MFD2921604.1	arr	NAD(+)--rifampin ADP-ribosyltransferase	core	AMR	AMR	RIFAMYCIN	RIFAMYCIN	HMM	147	143	97.9	55	140	WP_063842202.1	NAD(+)--rifampin ADP-ribosyltransferase	NF033144.1	NAD(+)--rifampin ADP-ribosyltransferase	4
GCA_045805145.1	Flavisolibacter sp.	MFL5741001.1	arsN1	arsinothricin resistance N-acetyltransferase ArsN1 family B	plus	STRESS	METAL	ARSENIC	ARSENIC	HMM	198	186	93.55	44.83	174	AAN67541.1	arsinothricin resistance N-acetyltransferase ArsN1 family B	NF040504.1	arsinothricin resistance N-acetyltransferase ArsN1 family B	6
GCA_045805145.1	Flavisolibacter sp.	MFL5742153.1	arr	NAD(+)--rifampin ADP-ribosyltransferase	core	AMR	AMR	RIFAMYCIN	RIFAMYCIN	HMM	146	137	94.89	61.54	130	WP_012695486.1	NAD(+)--rifampin ADP-ribosyltransferase	NF033144.1	NAD(+)--rifampin ADP-ribosyltransferase	6
GCA_045805145.1	Flavisolibacter sp.	MFL5742703.1	arsN2	arsenic resistance N-acetyltransferase ArsN2	plus	STRESS	METAL	ARSENIC	ARSENIC	HMM	148	142	90.85	34.11	129	ABB05616.1	arsenic resistance N-acetyltransferase ArsN2	NF040501.1	arsenic resistance N-acetyltransferase ArsN2	6
GCA_045805085.1	Niastella sp.	MFL5743076.1	bla	subclass B3 metallo-beta-lactamase	core	AMR	AMR	BETA-LACTAM	BETA-LACTAM	HMM	289	289	93.77	63.1	271	WP_041884311.1	subclass B3 metallo-beta-lactamase	NF033105.1	subclass B3 metallo-beta-lactamase	6
GCA_045805085.1	Niastella sp.	MFL5747170.1	arsN2	arsenic resistance N-acetyltransferase ArsN2	plus	STRESS	METAL	ARSENIC	ARSENIC	HMM	151	164	76.83	33.33	126	ABU58394.1	arsenic resistance N-acetyltransferase ArsN2	NF040501.1	arsenic resistance N-acetyltransferase ArsN2	6
GCA_045805165.1	Flavisolibacter sp.	MFL5787270.1	arsN2	arsenic resistance N-acetyltransferase ArsN2	plus	STRESS	METAL	ARSENIC	ARSENIC	HMM	150	147	96.6	35.17	145	ABG05788.1	arsenic resistance N-acetyltransferase ArsN2	NF040501.1	arsenic resistance N-acetyltransferase ArsN2	6
GCA_045805125.1	Flavisolibacter sp.	MFL5811318.1	arsN2	arsenic resistance N-acetyltransferase ArsN2	plus	STRESS	METAL	ARSENIC	ARSENIC	HMM	150	164	79.27	36.92	130	ABU58394.1	arsenic resistance N-acetyltransferase ArsN2	NF040501.1	arsenic resistance N-acetyltransferase ArsN2	1
GCA_045985675.1	Chitinophagaceae bacterium LWZ2-11	MFL9481777.1	bla	class A beta-lactamase, subclass A2	core	AMR	AMR	BETA-LACTAM	BETA-LACTAM	HMM	303	319	84.95	50.74	272	WP_063842272.1	class A beta-lactamase, subclass A2	NF012099.1	class A beta-lactamase, subclass A2	2
GCA_045985675.1	Chitinophagaceae bacterium LWZ2-11	MFL9482909.1	arr	NAD(+)--rifampin ADP-ribosyltransferase	core	AMR	AMR	RIFAMYCIN	RIFAMYCIN	HMM	148	137	96.35	58.33	132	WP_012695486.1	NAD(+)--rifampin ADP-ribosyltransferase	NF033144.1	NAD(+)--rifampin ADP-ribosyltransferase	2
GCA_045985675.1	Chitinophagaceae bacterium LWZ2-11	MFL9484140.1	bla	class A beta-lactamase, subclass A2	core	AMR	AMR	BETA-LACTAM	BETA-LACTAM	HMM	296	301	99.34	50.83	301	WP_032494759.1	class A beta-lactamase, subclass A2	NF012099.1	class A beta-lactamase, subclass A2	1
GCA_045985675.1	Chitinophagaceae bacterium LWZ2-11	MFL9484362.1	aac(6')	aminoglycoside 6'-N-acetyltransferase	core	AMR	AMR	AMINOGLYCOSIDE	AMINOGLYCOSIDE	HMM	145	182	78.02	52.11	142	WP_024566461.1	aminoglycoside 6'-N-acetyltransferase	NF043067.1	aminoglycoside 6'-N-acetyltransferase	2
GCA_045985675.1	Chitinophagaceae bacterium LWZ2-11	MFL9485576.1	bla	subclass B3 metallo-beta-lactamase	core	AMR	AMR	BETA-LACTAM	BETA-LACTAM	HMM	292	289	99.65	67.01	288	WP_041884311.1	subclass B3 metallo-beta-lactamase	NF033105.1	subclass B3 metallo-beta-lactamase	2
GCA_046070545.1	Ferruginibacter sp.	MFM6924794.1	blaOXA	class D beta-lactamase	core	AMR	AMR	BETA-LACTAM	BETA-LACTAM	HMM	271	267	97.38	38.6	272	WP_003235647.1	class D beta-lactamase	NF012161.0	class D beta-lactamase	1
GCA_046070545.1	Ferruginibacter sp.	MFM6925780.1	bla	subclass B1 metallo-beta-lactamase	core	AMR	AMR	BETA-LACTAM	BETA-LACTAM	HMM	271	266	98.12	57.47	261	WP_081048762.1	subclass B1 metallo-beta-lactamase	NF033088.2	subclass B1 metallo-beta-lactamase	6
GCA_046095445.1	Sediminibacterium sp.	MFM9020578.1	bla	BlaB/IND/MUS family subclass B1 metallo-beta-lactamase	core	AMR	AMR	BETA-LACTAM	BETA-LACTAM	HMM	256	246	87.4	50.7	215	WP_318245543.1	BlaB/IND/MUS family subclass B1 metallo-beta-lactamase	NF012146.1	BlaB/IND/MUS family subclass B1 metallo-beta-lactamase	6
GCA_046153465.1	Chitinophagaceae bacterium	MFM9910039.1	arsN2	arsenic resistance N-acetyltransferase ArsN2	plus	STRESS	METAL	ARSENIC	ARSENIC	HMM	147	144	93.06	37.78	135	KTT96020.1	arsenic resistance N-acetyltransferase ArsN2	NF040501.1	arsenic resistance N-acetyltransferase ArsN2	6
GCA_046153805.1	Ferruginibacter sp.	MFN0083102.1	blaOXA	class D beta-lactamase	core	AMR	AMR	BETA-LACTAM	BETA-LACTAM	HMM	275	267	84.27	39.92	243	WP_003235647.1	class D beta-lactamase	NF012161.0	class D beta-lactamase	6
GCA_046262255.1	Chitinophagaceae bacterium	MFN2456836.1	blaOXA	class D beta-lactamase	core	AMR	AMR	BETA-LACTAM	BETA-LACTAM	HMM	260	269	94.8	39.15	258	WP_242934118.1	class D beta-lactamase	NF012161.0	class D beta-lactamase	6
GCA_046262255.1	Chitinophagaceae bacterium	MFN2458611.1	merA	mercury(II) reductase	plus	STRESS	METAL	MERCURY	MERCURY	HMM	436	568	76.58	53.1	435	ADP02162.1	mercury(II) reductase	TIGR02053.1	mercury(II) reductase	6
GCA_046289145.1	Sediminibacterium sp.	MFN3299874.1	bla	BlaB/IND/MUS family subclass B1 metallo-beta-lactamase	core	AMR	AMR	BETA-LACTAM	BETA-LACTAM	HMM	343	246	94.31	50.86	232	WP_318245543.1	BlaB/IND/MUS family subclass B1 metallo-beta-lactamase	NF012146.1	BlaB/IND/MUS family subclass B1 metallo-beta-lactamase	1
GCA_046292535.1	Sediminibacterium sp.	MFN3665396.1	bla	subclass B1 metallo-beta-lactamase	core	AMR	AMR	BETA-LACTAM	BETA-LACTAM	HMM	226	252	87.3	60.91	220	WP_202272142.1	subclass B1 metallo-beta-lactamase	NF033088.2	subclass B1 metallo-beta-lactamase	2
GCA_046293615.1	Chitinophagaceae bacterium	MFN3793805.1	aph(3')	APH(3') family aminoglycoside O-phosphotransferase	core	AMR	AMR	AMINOGLYCOSIDE	AMINOGLYCOSIDE	HMM	259	264	100	35.93	270	WP_063842178.1	APH(3') family aminoglycoside O-phosphotransferase	NF033068.1	APH(3') family aminoglycoside O-phosphotransferase	2
GCA_046297715.1	Flavipsychrobacter sp.	MFN4247963.1	bla	class A beta-lactamase	core	AMR	AMR	BETA-LACTAM	BETA-LACTAM	HMM	307	309	92.23	37.46	291	WP_059512353.1	class A beta-lactamase	NF033103.1	class A beta-lactamase	1
GCA_046297715.1	Flavipsychrobacter sp.	MFN4249113.1	arr	NAD(+)--rifampin ADP-ribosyltransferase	core	AMR	AMR	RIFAMYCIN	RIFAMYCIN	HMM	137	143	82.52	54.24	118	WP_063842202.1	NAD(+)--rifampin ADP-ribosyltransferase	NF033144.1	NAD(+)--rifampin ADP-ribosyltransferase	1
GCA_046297935.1	Chitinophagaceae bacterium	MFN4316075.1	bla	subclass B3 metallo-beta-lactamase	core	AMR	AMR	BETA-LACTAM	BETA-LACTAM	HMM	290	293	97.61	58.76	291	WP_063842707.1	subclass B3 metallo-beta-lactamase	NF033105.1	subclass B3 metallo-beta-lactamase	2
GCA_046301455.1	Chitinophagaceae bacterium	MFN5133956.1	bla	BlaB/IND/MUS family subclass B1 metallo-beta-lactamase	core	AMR	AMR	BETA-LACTAM	BETA-LACTAM	HMM	245	241	96.68	55.36	233	WP_148044405.1	BlaB/IND/MUS family subclass B1 metallo-beta-lactamase	NF012146.1	BlaB/IND/MUS family subclass B1 metallo-beta-lactamase	2
GCA_046301455.1	Chitinophagaceae bacterium	MFN5134439.1	blaOXA	class D beta-lactamase	core	AMR	AMR	BETA-LACTAM	BETA-LACTAM	HMM	268	258	96.51	38.37	258	WP_004919358.1	class D beta-lactamase	NF012161.0	class D beta-lactamase	2
GCA_046329685.1	Ferruginibacter sp.	MFN8242757.1	blaOXA	class D beta-lactamase	core	AMR	AMR	BETA-LACTAM	BETA-LACTAM	HMM	274	267	95.13	40.38	265	WP_003235647.1	class D beta-lactamase	NF012161.0	class D beta-lactamase	2
GCA_046329695.1	Ferruginibacter sp.	MFN8247104.1	blaOXA	class D beta-lactamase	core	AMR	AMR	BETA-LACTAM	BETA-LACTAM	HMM	274	258	94.19	40.48	252	WP_004919358.1	class D beta-lactamase	NF012161.0	class D beta-lactamase	3
GCA_046329695.1	Ferruginibacter sp.	MFN8247164.1	bla	BlaB/IND/MUS family subclass B1 metallo-beta-lactamase	core	AMR	AMR	BETA-LACTAM	BETA-LACTAM	HMM	235	248	91.13	55.31	226	WP_012025466.1	BlaB/IND/MUS family subclass B1 metallo-beta-lactamase	NF012146.1	BlaB/IND/MUS family subclass B1 metallo-beta-lactamase	3
GCA_046329675.1	Ferruginibacter sp.	MFN8247601.1	blaOXA	class D beta-lactamase	core	AMR	AMR	BETA-LACTAM	BETA-LACTAM	HMM	272	262	97.71	40.15	269	WP_041816295.1	class D beta-lactamase	NF012161.0	class D beta-lactamase	3
GCA_046329675.1	Ferruginibacter sp.	MFN8248505.1	arr	NAD(+)--rifampin ADP-ribosyltransferase	core	AMR	AMR	RIFAMYCIN	RIFAMYCIN	HMM	145	143	86.71	54.84	124	WP_063842202.1	NAD(+)--rifampin ADP-ribosyltransferase	NF033144.1	NAD(+)--rifampin ADP-ribosyltransferase	3
GCA_046329675.1	Ferruginibacter sp.	MFN8248514.1	bla	subclass B1 metallo-beta-lactamase	core	AMR	AMR	BETA-LACTAM	BETA-LACTAM	HMM	252	252	99.21	64.8	250	WP_202272142.1	subclass B1 metallo-beta-lactamase	NF033088.2	subclass B1 metallo-beta-lactamase	3
GCA_046329655.1	Ferruginibacter sp.	MFN8250529.1	arsN2	arsenic resistance N-acetyltransferase ArsN2	plus	STRESS	METAL	ARSENIC	ARSENIC	HMM	150	147	89.12	36.64	131	UIK15784.1	arsenic resistance N-acetyltransferase ArsN2	NF040501.1	arsenic resistance N-acetyltransferase ArsN2	3
GCA_046329655.1	Ferruginibacter sp.	MFN8251167.1	bla	subclass B3 metallo-beta-lactamase	core	AMR	AMR	BETA-LACTAM	BETA-LACTAM	HMM	297	293	99.32	58.56	292	WP_063842707.1	subclass B3 metallo-beta-lactamase	NF033105.1	subclass B3 metallo-beta-lactamase	3
GCA_046329655.1	Ferruginibacter sp.	MFN8252098.1	blaOXA	class D beta-lactamase	core	AMR	AMR	BETA-LACTAM	BETA-LACTAM	HMM	273	258	97.67	41.67	264	WP_004919358.1	class D beta-lactamase	NF012161.0	class D beta-lactamase	3
GCA_046329585.1	Chitinophagaceae bacterium	MFN8268869.1	bla	subclass B3 metallo-beta-lactamase	core	AMR	AMR	BETA-LACTAM	BETA-LACTAM	HMM	295	293	96.25	66.2	287	WP_063842707.1	subclass B3 metallo-beta-lactamase	NF033105.1	subclass B3 metallo-beta-lactamase	3
GCA_046329665.1	Chitinophagaceae bacterium	MFN8289537.1	bla	BlaB/IND/MUS family subclass B1 metallo-beta-lactamase	core	AMR	AMR	BETA-LACTAM	BETA-LACTAM	HMM	249	246	98.37	56.38	243	WP_318245543.1	BlaB/IND/MUS family subclass B1 metallo-beta-lactamase	NF012146.1	BlaB/IND/MUS family subclass B1 metallo-beta-lactamase	6
GCA_046329755.1	Ferruginibacter sp.	MFN8306474.1	arsN2	arsenic resistance N-acetyltransferase ArsN2	plus	STRESS	METAL	ARSENIC	ARSENIC	HMM	148	144	82.64	39.5	119	KTT96020.1	arsenic resistance N-acetyltransferase ArsN2	NF040501.1	arsenic resistance N-acetyltransferase ArsN2	6
GCA_046329755.1	Ferruginibacter sp.	MFN8308148.1	blaOXA	class D beta-lactamase	core	AMR	AMR	BETA-LACTAM	BETA-LACTAM	HMM	273	267	95.13	40.75	265	WP_003235647.1	class D beta-lactamase	NF012161.0	class D beta-lactamase	6
GCA_046546515.1	Parasediminibacterium sp. JCM 36343	MFP5040769.1	blaOXA	class D beta-lactamase	core	AMR	AMR	BETA-LACTAM	BETA-LACTAM	HMM	277	258	96.9	39.54	263	WP_004919358.1	class D beta-lactamase	NF012161.0	class D beta-lactamase	6
GCA_009647655.1	Chitinophaga sp. SYP-B3965	MRG43482.1	bla	subclass B3 metallo-beta-lactamase	core	AMR	AMR	BETA-LACTAM	BETA-LACTAM	HMM	277	289	99.65	60.42	288	WP_041884311.1	subclass B3 metallo-beta-lactamase	NF033105.1	subclass B3 metallo-beta-lactamase	6
GCA_009647655.1	Chitinophaga sp. SYP-B3965	MRG46341.1	blaOXA	class D beta-lactamase	core	AMR	AMR	BETA-LACTAM	BETA-LACTAM	HMM	267	274	99.27	37.45	275	WP_063862698.1	class D beta-lactamase	NF012161.0	class D beta-lactamase	6
GCA_009647655.1	Chitinophaga sp. SYP-B3965	MRG47731.1	bla	class A beta-lactamase, subclass A2	core	AMR	AMR	BETA-LACTAM	BETA-LACTAM	HMM	303	319	88.71	48.24	284	WP_063842272.1	class A beta-lactamase, subclass A2	NF012099.1	class A beta-lactamase, subclass A2	1
GCA_009758205.1	Chitinophaga tropicalis	MVT07283.1	blaOXA	class D beta-lactamase	core	AMR	AMR	BETA-LACTAM	BETA-LACTAM	HMM	267	289	94.81	38.49	278	WP_075071939.1	class D beta-lactamase	NF012161.0	class D beta-lactamase	1
GCA_009758205.1	Chitinophaga tropicalis	MVT08428.1	bla	subclass B3 metallo-beta-lactamase	core	AMR	AMR	BETA-LACTAM	BETA-LACTAM	HMM	289	289	97.58	66.67	282	WP_041884311.1	subclass B3 metallo-beta-lactamase	NF033105.1	subclass B3 metallo-beta-lactamase	2
GCA_009758205.1	Chitinophaga tropicalis	MVT12557.1	bla	class A beta-lactamase, subclass A2	core	AMR	AMR	BETA-LACTAM	BETA-LACTAM	HMM	295	303	98.35	48.99	298	WP_041881964.1	class A beta-lactamase, subclass A2	NF012099.1	class A beta-lactamase, subclass A2	2
GCA_009758125.1	Chitinophaga oryziterrae	MVT40444.1	bla	class A beta-lactamase, subclass A2	core	AMR	AMR	BETA-LACTAM	BETA-LACTAM	HMM	296	303	93.73	54.93	284	WP_041881964.1	class A beta-lactamase, subclass A2	NF012099.1	class A beta-lactamase, subclass A2	1
GCA_009939005.1	Sediminibacterium roseum	NCI48583.1	blaOXA	class D beta-lactamase	core	AMR	AMR	BETA-LACTAM	BETA-LACTAM	HMM	282	289	98.96	36.88	301	WP_075071939.1	class D beta-lactamase	NF012161.0	class D beta-lactamase	2
GCA_009939005.1	Sediminibacterium roseum	NCI48924.1	bla	subclass B3 metallo-beta-lactamase	core	AMR	AMR	BETA-LACTAM	BETA-LACTAM	HMM	290	289	98.27	52.96	287	WP_041884311.1	subclass B3 metallo-beta-lactamase	NF033105.1	subclass B3 metallo-beta-lactamase	2
GCA_009996605.1	Chitinophagaceae bacterium	NCT74330.1	bla	subclass B3 metallo-beta-lactamase	core	AMR	AMR	BETA-LACTAM	BETA-LACTAM	HMM	291	293	93.86	65.34	277	WP_063842707.1	subclass B3 metallo-beta-lactamase	NF033105.1	subclass B3 metallo-beta-lactamase	1
GCA_009996605.1	Chitinophagaceae bacterium	NCT74881.1	arr	NAD(+)--rifampin ADP-ribosyltransferase	core	AMR	AMR	RIFAMYCIN	RIFAMYCIN	HMM	145	143	95.1	55.88	136	WP_063842202.1	NAD(+)--rifampin ADP-ribosyltransferase	NF033144.1	NAD(+)--rifampin ADP-ribosyltransferase	1
GCA_009996675.1	Chitinophagaceae bacterium	NCT93336.1	bla	BlaB/IND/MUS family subclass B1 metallo-beta-lactamase	core	AMR	AMR	BETA-LACTAM	BETA-LACTAM	HMM	248	248	95.56	54.01	237	WP_012025466.1	BlaB/IND/MUS family subclass B1 metallo-beta-lactamase	NF012146.1	BlaB/IND/MUS family subclass B1 metallo-beta-lactamase	1
GCA_009996675.1	Chitinophagaceae bacterium	NCT94232.1	blaOXA	class D beta-lactamase	core	AMR	AMR	BETA-LACTAM	BETA-LACTAM	HMM	282	289	96.89	36.43	291	WP_075071939.1	class D beta-lactamase	NF012161.0	class D beta-lactamase	2
GCA_009996555.1	Chitinophagaceae bacterium	NCU06222.1	blaOXA	class D beta-lactamase	core	AMR	AMR	BETA-LACTAM	BETA-LACTAM	HMM	268	258	98.84	37.5	264	WP_004919358.1	class D beta-lactamase	NF012161.0	class D beta-lactamase	2
GCA_009996555.1	Chitinophagaceae bacterium	NCU06297.1	bla	BlaB/IND/MUS family subclass B1 metallo-beta-lactamase	core	AMR	AMR	BETA-LACTAM	BETA-LACTAM	HMM	244	241	98.76	54.81	239	WP_148044405.1	BlaB/IND/MUS family subclass B1 metallo-beta-lactamase	NF012146.1	BlaB/IND/MUS family subclass B1 metallo-beta-lactamase	2
GCA_010692725.1	Flavihumibacter soli	NEU06895.1	arr	NAD(+)--rifampin ADP-ribosyltransferase	core	AMR	AMR	RIFAMYCIN	RIFAMYCIN	HMM	148	137	94.16	61.24	129	WP_012695486.1	NAD(+)--rifampin ADP-ribosyltransferase	NF033144.1	NAD(+)--rifampin ADP-ribosyltransferase	2
GCA_010692725.1	Flavihumibacter soli	NEU09187.1	bla	BlaB/IND/MUS family subclass B1 metallo-beta-lactamase	core	AMR	AMR	BETA-LACTAM	BETA-LACTAM	HMM	245	248	95.16	58.47	236	WP_012025466.1	BlaB/IND/MUS family subclass B1 metallo-beta-lactamase	NF012146.1	BlaB/IND/MUS family subclass B1 metallo-beta-lactamase	2
GCA_011752935.1	Chitinophaga sp. Cy-1792	NIG52241.1	blaOXA	class D beta-lactamase	core	AMR	AMR	BETA-LACTAM	BETA-LACTAM	HMM	267	289	83.04	41.74	242	WP_075071939.1	class D beta-lactamase	NF012161.0	class D beta-lactamase	2
GCA_011752935.1	Chitinophaga sp. Cy-1792	NIG54766.1	aadS	AadS family aminoglycoside 6-adenylyltransferase	core	AMR	AMR	AMINOGLYCOSIDE	STREPTOMYCIN	HMM	288	287	98.95	71.13	284	WP_003013318.1	AadS family aminoglycoside 6-adenylyltransferase	NF033387.1	AadS family aminoglycoside 6-adenylyltransferase	6
GCA_011752935.1	Chitinophaga sp. Cy-1792	NIG56833.1	bla	subclass B3 metallo-beta-lactamase	core	AMR	AMR	BETA-LACTAM	BETA-LACTAM	HMM	294	293	97.95	61.81	288	WP_063842707.1	subclass B3 metallo-beta-lactamase	NF033105.1	subclass B3 metallo-beta-lactamase	6
GCA_011759375.1	Paraflavitalea devenefica	NII27152.1	bla	BlaB/IND/MUS family subclass B1 metallo-beta-lactamase	core	AMR	AMR	BETA-LACTAM	BETA-LACTAM	HMM	245	241	97.93	55.19	241	WP_148044405.1	BlaB/IND/MUS family subclass B1 metallo-beta-lactamase	NF012146.1	BlaB/IND/MUS family subclass B1 metallo-beta-lactamase	6
GCA_011771645.1	Hydrotalea flava	NIM34110.1	bla	BlaB/IND/MUS family subclass B1 metallo-beta-lactamase	core	AMR	AMR	BETA-LACTAM	BETA-LACTAM	HMM	248	246	95.53	49.79	235	WP_318245543.1	BlaB/IND/MUS family subclass B1 metallo-beta-lactamase	NF012146.1	BlaB/IND/MUS family subclass B1 metallo-beta-lactamase	6
GCA_011771215.1	Hydrotalea flava	NIM36934.1	bla	BlaB/IND/MUS family subclass B1 metallo-beta-lactamase	core	AMR	AMR	BETA-LACTAM	BETA-LACTAM	HMM	248	246	95.53	49.79	235	WP_318245543.1	BlaB/IND/MUS family subclass B1 metallo-beta-lactamase	NF012146.1	BlaB/IND/MUS family subclass B1 metallo-beta-lactamase	6
GCA_011772325.1	Hydrotalea flava	NIN02126.1	bla	BlaB/IND/MUS family subclass B1 metallo-beta-lactamase	core	AMR	AMR	BETA-LACTAM	BETA-LACTAM	HMM	248	246	95.53	49.79	235	WP_318245543.1	BlaB/IND/MUS family subclass B1 metallo-beta-lactamase	NF012146.1	BlaB/IND/MUS family subclass B1 metallo-beta-lactamase	6
GCA_011771915.1	Hydrotalea flava	NIN13779.1	bla	BlaB/IND/MUS family subclass B1 metallo-beta-lactamase	core	AMR	AMR	BETA-LACTAM	BETA-LACTAM	HMM	248	246	95.53	49.79	235	WP_318245543.1	BlaB/IND/MUS family subclass B1 metallo-beta-lactamase	NF012146.1	BlaB/IND/MUS family subclass B1 metallo-beta-lactamase	1
GCA_011773605.1	Hydrotalea flava	NIO92860.1	bla	BlaB/IND/MUS family subclass B1 metallo-beta-lactamase	core	AMR	AMR	BETA-LACTAM	BETA-LACTAM	HMM	248	246	95.53	49.79	235	WP_318245543.1	BlaB/IND/MUS family subclass B1 metallo-beta-lactamase	NF012146.1	BlaB/IND/MUS family subclass B1 metallo-beta-lactamase	3
GCA_011773155.1	Hydrotalea flava	NIQ49274.1	bla	BlaB/IND/MUS family subclass B1 metallo-beta-lactamase	core	AMR	AMR	BETA-LACTAM	BETA-LACTAM	HMM	248	246	95.53	49.79	235	WP_318245543.1	BlaB/IND/MUS family subclass B1 metallo-beta-lactamase	NF012146.1	BlaB/IND/MUS family subclass B1 metallo-beta-lactamase	3
[truncated: 1,087 more rows]
