# Supplementary material
Source: Research Square preprint supplement (doi:10.21203/rs.3.rs-8368209/v1)
Supplement: Supplementary file 2 [file b85f8e1d8ffa0fabab899f66.xlsx]

## Sheet: Sheet1
Supplementary Table 3: Detailed annotation of mobile genetic elements (MGEs) recovered from MAGs. The table integrates functional annotation (mobileOG ID, gene name, functional categories), information on the corresponding MAG, contig, and ORF, as well as alignment metrics supporting each MGE hit. The last column reports the sample associated with each MAG.
sseqid	qseqid	mobileOG_ID	gene_name	best_hit_accession_ID	major_mobileOG_category	minor_mobileOG_category	source_DBs	evidence_type	mags	contig	orf	pident	bitscore	evalue	length	slen	qlen	sstart	send	qstart	qend	qcovhsp	scovhsp	mismatch	gapopen	sample
mobileOG_000443185|NA:Keyword|A0A174NVL7|transfer|NA|GPD|Keyword	mag_10_contig_248_orf_3	mobileOG_000443185	NA:Keyword	A0A174NVL7	transfer	NA	GPD	Keyword Search	mag_10	contig_248	orf_3	85.3	114	5.65e-34	68	73	72	1	68	1	68	94.4	93.2	10	0	FC4
mobileOG_000443185|NA:Keyword|A0A174NVL7|transfer|NA|GPD|Keyword	mag_10_contig_66_orf_5	mobileOG_000443185	NA:Keyword	A0A174NVL7	transfer	NA	GPD	Keyword Search	mag_10	contig_66	orf_5	88.6	119	5.63e-36	70	73	71	1	70	1	70	98.6	95.9	8	0	FC4
mobileOG_000355312|groL|WP_025414977.1|phage|replication,chaperone|Multiple|Homology	mag_10_contig_7_orf_19	mobileOG_000355312	groL	WP_025414977.1	phage	replication,chaperone	Multiple	Homology	mag_10	contig_7	orf_19	82.1	828	7.54e-301	542	552	544	1	541	1	540	99.3	98	94	3	CC4
mobileOG_000724178|NA:Keyword|A7H988|integration/excision|NA|ISFinder|Keyword	mag_11_contig_394_orf_4	mobileOG_000724178	NA:Keyword	A7H988	integration/excision	NA	ISFinder	Keyword Search	mag_11	contig_394	orf_4	87.8	671	4.23e-244	394	394	397	1	394	4	396	99	100	47	1	MD4
mobileOG_000145043|dnaK|A0A174WHA1|phage|infection,regulation|GPD|Homology	mag_12_contig_167_orf_4	mobileOG_000145043	dnaK	A0A174WHA1	phage	infection,regulation	GPD	Homology	mag_12	contig_167	orf_4	81.4	268	3.22e-86	161	643	162	1	161	1	161	99.4	25	30	0	FC4
mobileOG_000199360|hfq|R7BYG7|phage|infection,regulation|GPD|Homology	mag_12_contig_42_orf_21	mobileOG_000199360	hfq	R7BYG7	phage	infection,regulation	GPD	Homology	mag_12	contig_42	orf_21	83.8	127	4.27e-39	74	79	80	5	78	3	75	91.3	93.7	11	1	MD4
mobileOG_000443185|NA:Keyword|A0A174NVL7|transfer|NA|GPD|Keyword	mag_13_contig_233_orf_16	mobileOG_000443185	NA:Keyword	A0A174NVL7	transfer	NA	GPD	Keyword Search	mag_13	contig_233	orf_16	85.7	115	1.45e-34	70	73	73	1	70	1	70	95.9	95.9	10	0	FC4
mobileOG_000739478|NA:Keyword|WP_155326273.1|stability/transfer/defense|NA|Plasmid	mag_13_contig_77_orf_12	mobileOG_000739478	NA:Keyword	WP_155326273.1	stability/transfer/defense	NA	Plasmid RefSeq	Keyword Search	mag_13	contig_77	orf_12	81.8	113	6.62e-34	66	69	70	1	66	1	66	94.3	95.7	12	0	CC4
mobileOG_000106648|dnaK|A0A174FMF2|phage|infection,regulation|GPD|Homology	mag_14_contig_325_orf_5	mobileOG_000106648	dnaK	A0A174FMF2	phage	infection,regulation	GPD	Homology	mag_14	contig_325	orf_5	80.5	911	0	579	579	641	1	579	1	579	90.3	100	113	0	MD4
mobileOG_000443185|NA:Keyword|A0A174NVL7|transfer|NA|GPD|Keyword	mag_14_contig_81_orf_2	mobileOG_000443185	NA:Keyword	A0A174NVL7	transfer	NA	GPD	Keyword Search	mag_14	contig_81	orf_2	84.8	110	1.13e-32	66	73	68	1	66	1	66	97.1	90.4	10	0	CC4
mobileOG_000725802|NA:Keyword|Q1D4X0|integration/excision|NA|ISFinder|Keyword	mag_14_contig_96_orf_9	mobileOG_000725802	NA:Keyword	Q1D4X0	integration/excision	NA	ISFinder	Keyword Search	mag_14	contig_96	orf_9	82.4	196	6.16e-61	119	468	123	348	466	2	120	96.7	25.4	21	0	FC4
mobileOG_000059567|hfq|WP_035675971.1|phage|infection,regulation|Multiple|Homology	mag_15_contig_219_orf_101	mobileOG_000059567	hfq	WP_035675971.1	phage	infection,regulation	Multiple	Homology	mag_15	contig_219	orf_101	82.3	142	8.75e-45	79	82	84	2	80	3	81	94	96.3	14	0	FC4
mobileOG_000355643|groL|WP_149134430.1|phage|replication,chaperone|Plasmid	mag_15_contig_231_orf_1	mobileOG_000355643	groL	WP_149134430.1	phage	replication,chaperone	Plasmid RefSeq	Homology	mag_15	contig_231	orf_1	81.6	843	4.98e-305	538	540	541	1	538	1	538	99.4	99.6	99	0	FC4
mobileOG_000326762|tnpB|WP_019463324.1|integration/excision|NA|Plasmid	mag_15_contig_346_orf_4	mobileOG_000326762	tnpB	WP_019463324.1	integration/excision	NA	Plasmid RefSeq	Homology	mag_15	contig_346	orf_4	82	204	2.41e-68	111	115	115	5	115	4	114	96.5	96.5	20	0	FC4
mobileOG_000317231|copR|WP_014198317.1|transfer|conjugation,relaxosome|Plasmid	mag_15_contig_375_orf_18	mobileOG_000317231	copR	WP_014198317.1	transfer	conjugation,relaxosome	Plasmid RefSeq	Homology	mag_15	contig_375	orf_18	84.5	399	1.5e-141	233	243	238	1	233	1	233	97.9	95.9	36	0	FC4
mobileOG_000347218|clpX|WP_137194578.1|phage|replication,chaperone|Plasmid	mag_15_contig_55_orf_29	mobileOG_000347218	clpX	WP_137194578.1	phage	replication,chaperone	Plasmid RefSeq	Homology	mag_15	contig_55	orf_29	83.6	370	1.03e-127	225	421	225	1	224	1	224	99.6	53.2	35	2	FC4
mobileOG_000443185|NA:Keyword|A0A174NVL7|transfer|NA|GPD|Keyword	mag_16_contig_36_orf_2	mobileOG_000443185	NA:Keyword	A0A174NVL7	transfer	NA	GPD	Keyword Search	mag_16	contig_36	orf_2	90.4	128	1.11e-39	73	73	77	1	73	1	73	94.8	100	7	0	CC4
mobileOG_000289389|clpB|WP_011206944.1|phage|chaperone|Plasmid	mag_16_contig_42_orf_11	mobileOG_000289389	clpB	WP_011206944.1	phage	chaperone	Plasmid RefSeq	Homology	mag_16	contig_42	orf_11	92.2	212	2.58e-64	116	851	116	1	116	1	116	100	13.6	9	0	FC4
mobileOG_000741410|NA:Keyword|WP_008831688.1|phage|NA|Plasmid	mag_16_contig_53_orf_7	mobileOG_000741410	NA:Keyword	WP_008831688.1	phage	NA	Plasmid RefSeq	Keyword Search	mag_16	contig_53	orf_7	83.2	316	5.82e-111	173	174	174	1	173	1	173	99.4	99.4	29	0	CC4
mobileOG_000313149|hsdM|WP_035675754.1|stability/transfer/defense|NA|Plasmid	mag_17_contig_436_orf_13	mobileOG_000313149	hsdM	WP_035675754.1	stability/transfer/defense	NA	Plasmid RefSeq	Homology	mag_17	contig_436	orf_13	80.2	925	0	570	580	581	6	575	6	575	98.1	98.3	113	0	CC4
mobileOG_000355645|groL|WP_149346274.1|phage|replication,chaperone|Plasmid	mag_17_contig_46_orf_12	mobileOG_000355645	groL	WP_149346274.1	phage	replication,chaperone	Plasmid RefSeq	Homology	mag_17	contig_46	orf_12	81.4	840	5.95e-305	547	547	544	1	546	1	542	99.6	99.8	96	3	FC4
mobileOG_000443185|NA:Keyword|A0A174NVL7|transfer|NA|GPD|Keyword	mag_17_contig_49_orf_22	mobileOG_000443185	NA:Keyword	A0A174NVL7	transfer	NA	GPD	Keyword Search	mag_17	contig_49	orf_22	94.5	129	3.7e-40	73	73	76	1	73	1	73	96.1	100	4	0	FC4
mobileOG_000346927|xth|WP_149346408.1|replication/recombination/repair|NA|Plasmid	mag_18_contig_177_orf_18	mobileOG_000346927	xth	WP_149346408.1	replication/recombination/repair	NA	Plasmid RefSeq	Homology	mag_18	contig_177	orf_18	81.6	454	8.64e-163	255	257	257	1	255	1	255	99.2	99.2	47	0	CC4
mobileOG_000300998|groS|WP_149346273.1|phage|structural|Plasmid	mag_18_contig_242_orf_1	mobileOG_000300998	groS	WP_149346273.1	phage	structural	Plasmid RefSeq	Homology	mag_18	contig_242	orf_1	80.6	101	7.25e-29	62	91	64	29	90	1	62	96.9	68.1	12	0	CC4
mobileOG_000443185|NA:Keyword|A0A174NVL7|transfer|NA|GPD|Keyword	mag_19_contig_114_orf_3	mobileOG_000443185	NA:Keyword	A0A174NVL7	transfer	NA	GPD	Keyword Search	mag_19	contig_114	orf_3	80	110	9.39e-33	70	73	72	1	70	1	70	97.2	95.9	14	0	FC4
mobileOG_000317192|copR|WP_075382255.1|transfer|conjugation,relaxosome|Plasmid	mag_19_contig_123_orf_56	mobileOG_000317192	copR	WP_075382255.1	transfer	conjugation,relaxosome	Plasmid RefSeq	Homology	mag_19	contig_123	orf_56	91.2	412	9.82e-147	226	233	238	1	226	1	226	95	97	20	0	CC4
mobileOG_000355347|groL|WP_060850024.1|phage|replication,chaperone|Plasmid	mag_19_contig_4_orf_22	mobileOG_000355347	groL	WP_060850024.1	phage	replication,chaperone	Plasmid RefSeq	Homology	mag_19	contig_4	orf_22	81.8	634	1.4e-226	412	546	427	126	537	3	412	96	75.5	73	1	CC4
mobileOG_000322285|tnpA|WP_137195567.1|integration/excision|NA|Plasmid	mag_1_contig_10_orf_37	mobileOG_000322285	tnpA	WP_137195567.1	integration/excision	NA	Plasmid RefSeq	Homology	mag_1	contig_10	orf_37	87.5	102	4.08e-27	56	323	57	268	323	1	56	98.2	17.3	7	0	CC4
mobileOG_000289399|groL|WP_011211809.1|phage|replication,chaperone|Plasmid	mag_1_contig_120_orf_54	mobileOG_000289399	groL	WP_011211809.1	phage	replication,chaperone	Plasmid RefSeq	Homology	mag_1	contig_120	orf_54	84.5	842	7.63e-305	543	541	542	1	541	1	541	99.8	100	80	3	CD4
mobileOG_000726951|NA:Keyword|WP_107674828.1|stability/transfer/defense|NA|Multiple|Keyword	mag_1_contig_13_orf_3	mobileOG_000726951	NA:Keyword	WP_107674828.1	stability/transfer/defense	NA	Multiple	Keyword Search	mag_1	contig_13	orf_3	86.3	116	5.25e-35	73	73	74	1	73	1	73	98.6	100	10	0	CC4
mobileOG_000357315|xerC|WP_066819413.1|integration/excision|replication/recombination/repair|Plasmid	mag_1_contig_13_orf_4	mobileOG_000357315	xerC	WP_066819413.1	integration/excision	replication/recombination/repair	Plasmid RefSeq	Homology	mag_1	contig_13	orf_4	81.1	554	4.88e-199	339	358	350	24	358	11	349	96.9	93.6	60	1	CC4
mobileOG_000281732|dnaK|WP_096732306.1|phage|infection,regulation|Plasmid	mag_1_contig_152_orf_7	mobileOG_000281732	dnaK	WP_096732306.1	phage	infection,regulation	Plasmid RefSeq	Homology	mag_1	contig_152	orf_7	83.6	957	0	639	636	638	1	636	1	637	99.8	100	100	2	FD4
mobileOG_000398461|NA:Keyword|A0A222EBL7|integration/excision|NA|COMPASS|Keyword	mag_1_contig_17_orf_1	mobileOG_000398461	NA:Keyword	A0A222EBL7	integration/excision	NA	COMPASS	Keyword Search	mag_1	contig_17	orf_1	91.3	141	4.54e-43	69	223	70	155	223	1	69	98.6	30.9	6	0	CC4
mobileOG_000057160|R00164|WP_012160773.1|integration/excision|NA|Multiple|Homology	mag_1_contig_195_orf_7	mobileOG_000057160	R00164	WP_012160773.1	integration/excision	NA	Multiple	Homology	mag_1	contig_195	orf_7	81.3	109	4.5e-29	64	416	64	342	405	1	64	100	15.4	12	0	FD4
mobileOG_000348401|ihfA|WP_137194618.1|phage|integration/excision|Plasmid	mag_1_contig_1_orf_23	mobileOG_000348401	ihfA	WP_137194618.1	phage	integration/excision	Plasmid RefSeq	Homology	mag_1	contig_1	orf_23	85.9	170	1.56e-55	99	100	101	1	99	1	99	98	99	14	0	CC4
mobileOG_000727987|NA:Keyword|WP_167728009.1|stability/transfer/defense|NA|Plasmid	mag_1_contig_255_orf_4	mobileOG_000727987	NA:Keyword	WP_167728009.1	stability/transfer/defense	NA	Plasmid RefSeq	Keyword Search	mag_1	contig_255	orf_4	84.4	162	3.04e-52	90	132	90	1	90	1	90	100	68.2	14	0	FD4
mobileOG_000281921|dnaK|WP_146366878.1|phage|infection,regulation|Plasmid	mag_1_contig_25_orf_141	mobileOG_000281921	dnaK	WP_146366878.1	phage	infection,regulation	Plasmid RefSeq	Homology	mag_1	contig_25	orf_141	84.8	1039	0	639	639	638	1	637	1	636	99.7	99.7	92	3	CC4
mobileOG_000348374|nusA|WP_146366869.1|phage|regulation,infection|Plasmid	mag_1_contig_25_orf_152	mobileOG_000348374	nusA	WP_146366869.1	phage	regulation,infection	Plasmid RefSeq	Homology	mag_1	contig_25	orf_152	84	861	2.56e-305	538	538	535	1	538	1	534	99.8	100	82	1	CC4
mobileOG_000375322|llaDCHIBM|WP_127751517.1|stability/transfer/defense|NA|Plasmid	mag_1_contig_25_orf_183	mobileOG_000375322	llaDCHIBM	WP_127751517.1	stability/transfer/defense	NA	Plasmid RefSeq	Homology	mag_1	contig_25	orf_183	80.4	322	4.11e-110	194	367	199	173	366	1	193	97	52.9	37	1	CC4
mobileOG_000349674|uvrB|WP_137195408.1|replication/recombination/repair|NA|Plasmid	mag_1_contig_25_orf_7	mobileOG_000349674	uvrB	WP_137195408.1	replication/recombination/repair	NA	Plasmid RefSeq	Homology	mag_1	contig_25	orf_7	84.4	1209	0	725	725	726	1	724	1	725	99.9	99.9	112	1	CC4
mobileOG_000353837|gyrA|WP_137195789.1|replication/recombination/repair|NA|Plasmid	mag_1_contig_26_orf_61	mobileOG_000353837	gyrA	WP_137195789.1	replication/recombination/repair	NA	Plasmid RefSeq	Homology	mag_1	contig_26	orf_61	83.2	1453	0	894	902	908	1	892	14	907	98.5	98.9	148	1	CC4
mobileOG_000322285|tnpA|WP_137195567.1|integration/excision|NA|Plasmid	mag_1_contig_2_orf_1	mobileOG_000322285	tnpA	WP_137195567.1	integration/excision	NA	Plasmid RefSeq	Homology	mag_1	contig_2	orf_1	92.8	157	9.96e-48	83	323	83	1	83	1	83	100	25.7	6	0	CC4
mobileOG_000398461|NA:Keyword|A0A222EBL7|integration/excision|NA|COMPASS|Keyword	mag_1_contig_30_orf_1	mobileOG_000398461	NA:Keyword	A0A222EBL7	integration/excision	NA	COMPASS	Keyword Search	mag_1	contig_30	orf_1	89.9	141	4.54e-43	69	223	70	155	223	1	69	98.6	30.9	7	0	CC4
mobileOG_000277030|tnpA|C6KU75|integration/excision|NA|ISFinder|Homology	mag_1_contig_31_orf_18	mobileOG_000277030	tnpA	C6KU75	integration/excision	NA	ISFinder	Homology	mag_1	contig_31	orf_18	91	579	1.56e-210	310	310	311	1	310	1	310	99.7	100	28	0	CC4
mobileOG_000322285|tnpA|WP_137195567.1|integration/excision|NA|Plasmid	mag_1_contig_31_orf_22	mobileOG_000322285	tnpA	WP_137195567.1	integration/excision	NA	Plasmid RefSeq	Homology	mag_1	contig_31	orf_22	87.9	109	1.02e-29	58	323	59	266	323	1	58	98.3	18	7	0	CC4
mobileOG_000373043|groL|WP_167624166.1|phage|replication,chaperone|Plasmid	mag_1_contig_32_orf_29	mobileOG_000373043	groL	WP_167624166.1	phage	replication,chaperone	Plasmid RefSeq	Homology	mag_1	contig_32	orf_29	91.9	920	0	529	548	550	1	529	1	529	96.2	96.5	43	0	CC4
mobileOG_000037607|groS|WP_011750809.1|phage|structural|Multiple|Homology	mag_1_contig_32_orf_30	mobileOG_000037607	groS	WP_011750809.1	phage	structural	Multiple	Homology	mag_1	contig_32	orf_30	87.4	169	2.2e-55	95	95	96	1	95	1	95	99	100	12	0	CC4
mobileOG_000306659|clpB|WP_096541098.1|phage|chaperone|Plasmid	mag_1_contig_332_orf_14	mobileOG_000306659	clpB	WP_096541098.1	phage	chaperone	Plasmid RefSeq	Homology	mag_1	contig_332	orf_14	87.4	1347	0	812	822	829	1	812	1	811	97.8	98.8	101	1	FD4
mobileOG_000345750|higA|WP_103668857.1|stability/transfer/defense|NA|Plasmid	mag_1_contig_341_orf_3	mobileOG_000345750	higA	WP_103668857.1	stability/transfer/defense	NA	Plasmid RefSeq	Homology	mag_1	contig_341	orf_3	87.9	172	2.18e-56	99	103	102	1	99	1	99	97.1	96.1	12	0	FD4
mobileOG_000317556|higB-1|WP_126391737.1|stability/transfer/defense|NA|Plasmid	mag_1_contig_341_orf_4	mobileOG_000317556	higB-1	WP_126391737.1	stability/transfer/defense	NA	Plasmid RefSeq	Homology	mag_1	contig_341	orf_4	86.2	170	1.44e-55	94	94	95	1	94	1	94	98.9	100	13	0	FD4
mobileOG_000349812|radA|WP_137194663.1|replication/recombination/repair|competence|Plasmid	mag_1_contig_35_orf_33	mobileOG_000349812	radA	WP_137194663.1	replication/recombination/repair	competence	Plasmid RefSeq	Homology	mag_1	contig_35	orf_33	83.5	728	2.2e-264	455	452	456	1	452	1	455	99.8	100	72	2	CC4
mobileOG_000355102|uvrA|WP_137194563.1|replication/recombination/repair|NA|Plasmid	mag_1_contig_35_orf_50	mobileOG_000355102	uvrA	WP_137194563.1	replication/recombination/repair	NA	Plasmid RefSeq	Homology	mag_1	contig_35	orf_50	85	1638	0	952	950	953	1	950	1	952	99.9	100	141	1	CC4
mobileOG_000350570|ssb|WP_137194777.1|replication/recombination/repair|NA|Plasmid	mag_1_contig_35_orf_85	mobileOG_000350570	ssb	WP_137194777.1	replication/recombination/repair	NA	Plasmid RefSeq	Homology	mag_1	contig_35	orf_85	82.2	207	3.46e-68	169	169	168	1	169	1	167	99.4	100	28	1	CC4
mobileOG_000416324|NA:Keyword|WP_011907123.1|integration/excision|NA|COMPASS|Keyword	mag_1_contig_36_orf_12	mobileOG_000416324	NA:Keyword	WP_011907123.1	integration/excision	NA	COMPASS	Keyword Search	mag_1	contig_36	orf_12	87.3	132	3.46e-40	79	145	82	1	79	1	79	96.3	54.5	10	0	CC4
mobileOG_000049071|NA|A0A1D9M833|integration/excision|NA|COMPASS|Homology	mag_1_contig_36_orf_27	mobileOG_000049071	NA	A0A1D9M833	integration/excision	NA	COMPASS	Homology	mag_1	contig_36	orf_27	85.7	130	6.95e-40	77	127	78	51	127	1	77	98.7	60.6	11	0	CC4
mobileOG_000025697|ihfB|WP_005610003.1|integration/excision|regulation,lysis/lysogeny|Multiple|Manual	mag_1_contig_38_orf_4	mobileOG_000025697	ihfB	WP_005610003.1	integration/excision	regulation,lysis/lysogeny	Multiple	Manual	mag_1	contig_38	orf_4	84.8	164	2.77e-53	92	95	94	1	92	1	92	97.9	96.8	14	0	CC4
mobileOG_000342416|copR|WP_050528217.1|transfer|conjugation,relaxosome|Plasmid	mag_1_contig_39_orf_24	mobileOG_000342416	copR	WP_050528217.1	transfer	conjugation,relaxosome	Plasmid RefSeq	Homology	mag_1	contig_39	orf_24	86.4	419	2.04e-149	228	238	237	1	228	1	228	96.2	95.8	31	0	CC4
mobileOG_000277030|tnpA|C6KU75|integration/excision|NA|ISFinder|Homology	mag_1_contig_47_orf_14	mobileOG_000277030	tnpA	C6KU75	integration/excision	NA	ISFinder	Homology	mag_1	contig_47	orf_14	88.9	150	1.67e-45	81	310	81	1	81	1	81	100	26.1	9	0	CC4
mobileOG_000332794|oppB|WP_120352378.1|transfer|competence|Plasmid	mag_1_contig_48_orf_41	mobileOG_000332794	oppB	WP_120352378.1	transfer	competence	Plasmid RefSeq	Homology	mag_1	contig_48	orf_41	80.8	499	8.02e-179	307	305	308	1	305	1	307	99.7	100	57	1	CC4
mobileOG_000282677|recA|WP_137194640.1|replication/recombination/repair|NA|Plasmid	mag_1_contig_4_orf_90	mobileOG_000282677	recA	WP_137194640.1	replication/recombination/repair	NA	Plasmid RefSeq	Homology	mag_1	contig_4	orf_90	84.6	592	3.82e-214	356	357	358	1	356	1	356	99.4	99.7	55	0	CC4
mobileOG_000417264|NA:Keyword|WP_157127029.1|integration/excision|NA|COMPASS|Keyword	mag_1_contig_52_orf_1	mobileOG_000417264	NA:Keyword	WP_157127029.1	integration/excision	NA	COMPASS	Keyword Search	mag_1	contig_52	orf_1	85.3	285	7.46e-97	156	326	157	171	326	1	156	99.4	47.9	23	0	CD4
mobileOG_000277030|tnpA|C6KU75|integration/excision|NA|ISFinder|Homology	mag_1_contig_55_orf_1	mobileOG_000277030	tnpA	C6KU75	integration/excision	NA	ISFinder	Homology	mag_1	contig_55	orf_1	93.5	182	1.27e-57	92	310	93	1	92	1	92	98.9	29.7	6	0	CC4
mobileOG_000331033|dnaX|WP_065317498.1|replication/recombination/repair|NA|Plasmid	mag_1_contig_56_orf_1	mobileOG_000331033	dnaX	WP_065317498.1	replication/recombination/repair	NA	Plasmid RefSeq	Homology	mag_1	contig_56	orf_1	96.8	245	2.66e-78	126	608	133	16	141	8	133	94.7	20.7	4	0	CC4
mobileOG_000276221|NA|F4ZZC6|integration/excision|NA|ISFinder|Homology	mag_1_contig_5_orf_14	mobileOG_000276221	NA	F4ZZC6	integration/excision	NA	ISFinder	Homology	mag_1	contig_5	orf_14	83.5	200	1.75e-63	121	357	122	111	231	1	121	99.2	33.9	20	0	CC4
mobileOG_000406273|NA:Keyword|A0A2S6BNF8|integration/excision|NA|COMPASS|Keyword	mag_1_contig_5_orf_65	mobileOG_000406273	NA:Keyword	A0A2S6BNF8	integration/excision	NA	COMPASS	Keyword Search	mag_1	contig_5	orf_65	80.5	249	1.33e-81	154	372	171	187	340	1	154	90.1	41.4	30	0	CC4
mobileOG_000282652|recA|WP_068525022.1|replication/recombination/repair|NA|Plasmid	mag_1_contig_65_orf_14	mobileOG_000282652	recA	WP_068525022.1	replication/recombination/repair	NA	Plasmid RefSeq	Homology	mag_1	contig_65	orf_14	83.8	558	1.28e-200	334	349	355	7	340	5	338	94.1	95.7	54	0	CD4
mobileOG_000726229|NA:Keyword|A0A368YF19|integration/excision|NA|ISFinder|Keyword	mag_1_contig_71_orf_1	mobileOG_000726229	NA:Keyword	A0A368YF19	integration/excision	NA	ISFinder	Keyword Search	mag_1	contig_71	orf_1	85.5	942	0	550	550	544	1	550	1	543	99.8	100	73	1	CC4
mobileOG_000337342|tnpB|WP_136887810.1|integration/excision|NA|Plasmid	mag_1_contig_71_orf_2	mobileOG_000337342	tnpB	WP_136887810.1	integration/excision	NA	Plasmid RefSeq	Homology	mag_1	contig_71	orf_2	93.1	235	8.37e-81	116	116	117	1	116	1	116	99.1	100	8	0	CC4
mobileOG_000347218|clpX|WP_137194578.1|phage|replication,chaperone|Plasmid	mag_1_contig_72_orf_14	mobileOG_000347218	clpX	WP_137194578.1	phage	replication,chaperone	Plasmid RefSeq	Homology	mag_1	contig_72	orf_14	90.3	752	4.74e-275	421	421	423	1	420	1	421	99.5	99.8	40	1	CC4
mobileOG_000351423|clpP|WP_137194577.1|phage|replication/recombination/repair|Plasmid	mag_1_contig_72_orf_15	mobileOG_000351423	clpP	WP_137194577.1	phage	replication/recombination/repair	Plasmid RefSeq	Homology	mag_1	contig_72	orf_15	87.6	355	2.49e-125	202	210	210	1	202	1	202	96.2	96.2	25	0	CC4
mobileOG_000443185|NA:Keyword|A0A174NVL7|transfer|NA|GPD|Keyword	mag_20_contig_76_orf_172	mobileOG_000443185	NA:Keyword	A0A174NVL7	transfer	NA	GPD	Keyword Search	mag_20	contig_76	orf_172	93.2	128	1.45e-39	73	73	75	1	73	1	73	97.3	100	5	0	CC4
mobileOG_000298654|uvrA|WP_060594714.1|replication/recombination/repair|NA|Plasmid	mag_21_contig_108_orf_2	mobileOG_000298654	uvrA	WP_060594714.1	replication/recombination/repair	NA	Plasmid RefSeq	Homology	mag_21	contig_108	orf_2	80.9	1263	0	775	795	785	21	794	1	775	98.7	97.4	147	1	CC4
mobileOG_000414166|NA:Keyword|A0A2K8WTU1|integration/excision|NA|COMPASS|Keyword	mag_22_contig_79_orf_4	mobileOG_000414166	NA:Keyword	A0A2K8WTU1	integration/excision	NA	COMPASS	Keyword Search	mag_22	contig_79	orf_4	81	581	6.81e-210	352	352	353	1	352	1	352	99.7	100	67	0	FC4
mobileOG_000302590|uvrA|WP_014197269.1|replication/recombination/repair|NA|Plasmid	mag_22_contig_7_orf_22	mobileOG_000302590	uvrA	WP_014197269.1	replication/recombination/repair	NA	Plasmid RefSeq	Homology	mag_22	contig_7	orf_22	84.5	173	2.1e-50	103	950	105	2	104	3	105	98.1	10.8	16	0	FC4
mobileOG_000355645|groL|WP_149346274.1|phage|replication,chaperone|Plasmid	mag_24_contig_205_orf_16	mobileOG_000355645	groL	WP_149346274.1	phage	replication,chaperone	Plasmid RefSeq	Homology	mag_24	contig_205	orf_16	82.4	850	6.57e-305	547	547	544	1	547	1	541	99.4	100	90	2	FC4
mobileOG_000443185|NA:Keyword|A0A174NVL7|transfer|NA|GPD|Keyword	mag_25_contig_83_orf_47	mobileOG_000443185	NA:Keyword	A0A174NVL7	transfer	NA	GPD	Keyword Search	mag_25	contig_83	orf_47	87.7	112	1.37e-33	65	73	68	1	65	1	65	95.6	89	8	0	FC4
mobileOG_000410920|NA:Keyword|WP_120219001.1|integration/excision|NA|COMPASS|Keyword	mag_26_contig_17_orf_70	mobileOG_000410920	NA:Keyword	WP_120219001.1	integration/excision	NA	COMPASS	Keyword Search	mag_26	contig_17	orf_70	90	272	8.45e-92	150	326	151	177	326	1	150	99.3	46	15	0	CC4
mobileOG_000282675|recA|WP_129393205.1|replication/recombination/repair|NA|Plasmid	mag_26_contig_40_orf_38	mobileOG_000282675	recA	WP_129393205.1	replication/recombination/repair	NA	Plasmid RefSeq	Homology	mag_26	contig_40	orf_38	80.3	555	2.66e-199	356	352	358	1	351	1	356	99.4	99.7	65	1	CC4
mobileOG_000037995|groS|WP_011970827.1|phage|structural|Multiple|Homology	mag_26_contig_40_orf_50	mobileOG_000037995	groS	WP_011970827.1	phage	structural	Multiple	Homology	mag_26	contig_40	orf_50	80.6	157	1.84e-50	93	98	96	6	98	3	95	96.9	94.9	18	0	CC4
mobileOG_000374511|NGR_a01870|WP_041558390.1|integration/excision|NA|Plasmid	mag_26_contig_63_orf_45	mobileOG_000374511	NGR_a01870	WP_041558390.1	integration/excision	NA	Plasmid RefSeq	Homology	mag_26	contig_63	orf_45	84.1	504	5.48e-181	295	302	300	8	302	5	299	98.3	97.7	47	0	CC4
mobileOG_000333364|rutA|WP_069064197.1|replication/recombination/repair|NA|Multiple|Homology	mag_26_contig_75_orf_4	mobileOG_000333364	rutA	WP_069064197.1	replication/recombination/repair	NA	Multiple	Homology	mag_26	contig_75	orf_4	85.3	627	5.26e-228	354	357	358	1	354	1	354	98.9	99.2	52	0	CC4
mobileOG_000724708|NA:Keyword|A0A0H3C6B3|integration/excision|NA|ISFinder|Keyword	mag_26_contig_77_orf_41	mobileOG_000724708	NA:Keyword	A0A0H3C6B3	integration/excision	NA	ISFinder	Keyword Search	mag_26	contig_77	orf_41	87.2	205	1.28e-68	125	125	126	1	125	1	125	99.2	100	16	0	CC4
mobileOG_000038070|NGR_a01770|WP_011950467.1|integration/excision|NA|Multiple|Homology	mag_26_contig_83_orf_2	mobileOG_000038070	NGR_a01770	WP_011950467.1	integration/excision	NA	Multiple	Homology	mag_26	contig_83	orf_2	91.4	696	4.22e-254	382	383	384	1	382	1	382	99.5	99.7	33	0	CC4
mobileOG_000284819|copR|A0A0D5A0C6|transfer|conjugation,relaxosome|Multiple|Homology	mag_26_contig_87_orf_9	mobileOG_000284819	copR	A0A0D5A0C6	transfer	conjugation,relaxosome	Multiple	Homology	mag_26	contig_87	orf_9	92	420	5.49e-150	225	233	235	1	225	1	225	95.7	96.6	18	0	CC4
mobileOG_000294825|ftsH|WP_043804222.1|phage|infection,regulation|Plasmid	mag_27_contig_11_orf_6	mobileOG_000294825	ftsH	WP_043804222.1	phage	infection,regulation	Plasmid RefSeq	Homology	mag_27	contig_11	orf_6	86.3	1026	0	621	621	621	1	621	1	620	99.8	100	84	1	CC4
mobileOG_000354098|dinB|WP_013623150.1|replication/recombination/repair|NA|Plasmid	mag_27_contig_121_orf_18	mobileOG_000354098	dinB	WP_013623150.1	replication/recombination/repair	NA	Plasmid RefSeq	Homology	mag_27	contig_121	orf_18	82.6	143	7.24e-42	86	368	86	1	86	1	86	100	23.4	15	0	CC4
mobileOG_000289437|oppD|A0A0A7KF65|transfer|competence|Plasmid	mag_27_contig_128_orf_17	mobileOG_000289437	oppD	A0A0A7KF65	transfer	competence	Plasmid RefSeq	Homology	mag_27	contig_128	orf_17	86.8	607	4.43e-220	348	348	349	1	348	1	348	99.7	100	46	0	CC4
mobileOG_000289445|oppF|A0A0A7KF48|transfer|competence|Plasmid	mag_27_contig_128_orf_18	mobileOG_000289445	oppF	A0A0A7KF48	transfer	competence	Plasmid RefSeq	Homology	mag_27	contig_128	orf_18	92.4	599	1.48e-217	327	327	347	1	327	20	346	94.2	100	25	0	CC4
mobileOG_000314696|tnpA|WP_114673390.1|integration/excision|NA|Plasmid	mag_27_contig_141_orf_39	mobileOG_000314696	tnpA	WP_114673390.1	integration/excision	NA	Plasmid RefSeq	Homology	mag_27	contig_141	orf_39	82	170	2.28e-49	100	986	101	887	986	1	100	99	10.1	18	0	CC4
mobileOG_000407995|NA:Keyword|H8H2P8|integration/excision|NA|COMPASS|Keyword	mag_27_contig_228_orf_18	mobileOG_000407995	NA:Keyword	H8H2P8	integration/excision	NA	COMPASS	Keyword Search	mag_27	contig_228	orf_18	89.4	168	2.93e-52	94	287	96	27	120	1	94	97.9	32.8	10	0	CC4
mobileOG_000282627|recA|WP_012694687.1|replication/recombination/repair|NA|Plasmid	mag_27_contig_37_orf_12	mobileOG_000282627	recA	WP_012694687.1	replication/recombination/repair	NA	Plasmid RefSeq	Homology	mag_27	contig_37	orf_12	80.6	528	6.35e-189	340	344	358	4	342	18	356	94.7	98.5	64	2	CC4
mobileOG_000301108|NA|WP_151848787.1|integration/excision|NA|Plasmid	mag_27_contig_74_orf_16	mobileOG_000301108	NA	WP_151848787.1	integration/excision	NA	Plasmid RefSeq	Homology	mag_27	contig_74	orf_16	89.6	328	3.42e-115	183	185	184	1	183	1	183	99.5	98.9	19	0	CC4
mobileOG_000748502|NA:Keyword|WP_114673227.1|integration/excision|NA|Plasmid	mag_27_contig_74_orf_19	mobileOG_000748502	NA:Keyword	WP_114673227.1	integration/excision	NA	Plasmid RefSeq	Keyword Search	mag_27	contig_74	orf_19	86	405	4.09e-144	236	236	237	1	236	1	236	99.6	100	33	0	CC4
mobileOG_000289457|tIS1421|WP_014682776.1|integration/excision|NA|Plasmid	mag_27_contig_80_orf_7	mobileOG_000289457	tIS1421	WP_014682776.1	integration/excision	NA	Plasmid RefSeq	Homology	mag_27	contig_80	orf_7	88.5	409	5.89e-145	235	269	238	33	267	1	235	98.7	87.4	27	0	CC4
mobileOG_000289451|parA|A0A5C4YD28|replication/recombination/repair|partitioning|Plasmid	mag_27_contig_86_orf_23	mobileOG_000289451	parA	A0A5C4YD28	replication/recombination/repair	partitioning	Plasmid RefSeq	Homology	mag_27	contig_86	orf_23	87.5	444	8.89e-159	255	258	259	1	255	1	255	98.5	98.8	32	0	CC4
mobileOG_000302141|oppF|WP_151845668.1|transfer|competence|Plasmid	mag_27_contig_92_orf_35	mobileOG_000302141	oppF	WP_151845668.1	transfer	competence	Plasmid RefSeq	Homology	mag_27	contig_92	orf_35	81.4	518	2.59e-185	328	337	353	2	329	15	341	92.6	97.3	60	1	CC4
mobileOG_000299952|oppD|WP_151845529.1|transfer|competence|Plasmid	mag_27_contig_92_orf_36	mobileOG_000299952	oppD	WP_151845529.1	transfer	competence	Plasmid RefSeq	Homology	mag_27	contig_92	orf_36	80	501	1.51e-178	320	334	342	4	323	16	335	93.6	95.8	64	0	CC4
mobileOG_000739329|NA:Keyword|WP_151845303.1|phage|NA|Plasmid	mag_27_contig_92_orf_41	mobileOG_000739329	NA:Keyword	WP_151845303.1	phage	NA	Plasmid RefSeq	Keyword Search	mag_27	contig_92	orf_41	86.7	680	3.91e-247	405	404	406	1	402	1	405	99.8	99.5	51	1	CC4
mobileOG_000739764|NA:Keyword|WP_151845302.1|phage|NA|Plasmid	mag_27_contig_92_orf_42	mobileOG_000739764	NA:Keyword	WP_151845302.1	phage	NA	Plasmid RefSeq	Keyword Search	mag_27	contig_92	orf_42	88.1	263	6.51e-91	143	143	144	1	143	1	143	99.3	100	17	0	CC4
mobileOG_000333489|clpA|WP_013211710.1|phage|infection,regulation|Plasmid	mag_2_contig_196_orf_43	mobileOG_000333489	clpA	WP_013211710.1	phage	infection,regulation	Plasmid RefSeq	Homology	mag_2	contig_196	orf_43	81.7	1218	0	765	762	771	1	761	1	765	99.2	99.9	136	1	MC4
mobileOG_000355312|groL|WP_025414977.1|phage|replication,chaperone|Multiple|Homology	mag_2_contig_3_orf_1	mobileOG_000355312	groL	WP_025414977.1	phage	replication,chaperone	Multiple	Homology	mag_2	contig_3	orf_1	87.1	537	6.38e-190	318	552	318	1	318	1	318	100	57.6	41	0	FC4
mobileOG_000369867|copR|A0A132HPM0|transfer|conjugation,relaxosome|Plasmid	mag_2_contig_3_orf_19	mobileOG_000369867	copR	A0A132HPM0	transfer	conjugation,relaxosome	Plasmid RefSeq	Homology	mag_2	contig_3	orf_19	81	389	2.05e-137	232	240	242	7	238	8	239	95.9	96.7	44	0	MC4
mobileOG_000000023|clpP|A0A0E8C6P4|phage|replication/recombination/repair|ACLAME|Manual	mag_2_contig_3_orf_7	mobileOG_000000023	clpP	A0A0E8C6P4	phage	replication/recombination/repair	ACLAME	Manual	mag_2	contig_3	orf_7	80.3	331	1.94e-115	203	217	212	14	216	7	209	95.8	93.5	40	0	MC4
mobileOG_000026648|hfq|Q8Y025|phage|replication/recombination/repair|Plasmid	mag_2_contig_56_orf_22	mobileOG_000026648	hfq	Q8Y025	phage	replication/recombination/repair	Plasmid RefSeq	Manual	mag_2	contig_56	orf_22	89.6	136	8.56e-43	77	79	78	1	77	1	77	98.7	97.5	8	0	MC4
mobileOG_000726300|NA:Keyword|Q9Z3Q4|integration/excision|NA|ISFinder|Keyword	mag_30_contig_162_orf_3	mobileOG_000726300	NA:Keyword	Q9Z3Q4	integration/excision	NA	ISFinder	Keyword Search	mag_30	contig_162	orf_3	80.3	107	4.35e-28	61	448	64	4	64	3	63	95.3	13.6	12	0	FC4
mobileOG_000406191|NA:Keyword|WP_015887115.1|integration/excision|NA|Multiple|Keyword	mag_30_contig_162_orf_4	mobileOG_000406191	NA:Keyword	WP_015887115.1	integration/excision	NA	Multiple	Keyword Search	mag_30	contig_162	orf_4	83.1	300	1.2e-100	178	452	181	64	241	1	178	98.3	39.4	30	0	FC4
mobileOG_000395440|NA:Keyword|B8KM22|integration/excision|NA|COMPASS|Keyword	mag_30_contig_29_orf_5	mobileOG_000395440	NA:Keyword	B8KM22	integration/excision	NA	COMPASS	Keyword Search	mag_30	contig_29	orf_5	94.5	218	1.72e-72	109	239	109	1	109	1	109	100	45.6	6	0	FC4
mobileOG_000023778|pilT_3|A0A154FZT9|transfer|conjugation,regulation|Plasmid	mag_30_contig_37_orf_20	mobileOG_000023778	pilT_3	A0A154FZT9	transfer	conjugation,regulation	Plasmid RefSeq	Manual	mag_30	contig_37	orf_20	83.4	572	1.76e-206	344	355	345	11	354	1	344	99.7	96.9	57	0	FC4
mobileOG_000332247|hsdM|WP_130788694.1|stability/transfer/defense|NA|Plasmid	mag_32_contig_157_orf_1	mobileOG_000332247	hsdM	WP_130788694.1	stability/transfer/defense	NA	Plasmid RefSeq	Homology	mag_32	contig_157	orf_1	83.7	421	1.21e-145	245	541	248	295	539	1	245	98.8	45.3	40	0	FC4
mobileOG_000355645|groL|WP_149346274.1|phage|replication,chaperone|Plasmid	mag_33_contig_112_orf_5	mobileOG_000355645	groL	WP_149346274.1	phage	replication,chaperone	Plasmid RefSeq	Homology	mag_33	contig_112	orf_5	83.5	877	0	546	547	547	1	546	1	543	99.3	99.8	87	1	FC4
mobileOG_000313217|fic|WP_013769117.1|replication/recombination/repair|transfer|Plasmid	mag_33_contig_192_orf_2	mobileOG_000313217	fic	WP_013769117.1	replication/recombination/repair	transfer	Plasmid RefSeq	Homology	mag_33	contig_192	orf_2	89.7	177	4.48e-55	97	368	98	1	97	1	97	99	26.4	10	0	FC4
mobileOG_000313217|fic|WP_013769117.1|replication/recombination/repair|transfer|Plasmid	mag_33_contig_192_orf_3	mobileOG_000313217	fic	WP_013769117.1	replication/recombination/repair	transfer	Plasmid RefSeq	Homology	mag_33	contig_192	orf_3	86.8	470	3.95e-167	265	368	267	103	367	1	265	99.3	72	35	0	FC4
mobileOG_000022000|ihfA|WP_001229265.1|integration/excision|regulation,lysis/lysogeny|Multiple|Manual	mag_33_contig_238_orf_43	mobileOG_000022000	ihfA	WP_001229265.1	integration/excision	regulation,lysis/lysogeny	Multiple	Manual	mag_33	contig_238	orf_43	85.7	160	1.4e-51	91	99	101	2	92	3	93	90.1	91.9	13	0	CC4
mobileOG_000023005|tnpA|Q1LNT8|integration/excision|NA|ICE|Manual	mag_33_contig_51_orf_42	mobileOG_000023005	tnpA	Q1LNT8	integration/excision	NA	ICE	Manual	mag_33	contig_51	orf_42	87.4	154	1.57e-49	87	87	88	1	87	1	87	98.9	100	11	0	CC4
mobileOG_000359972|NA|WP_101501105.1|integration/excision|NA|Multiple|Homology	mag_34_contig_195_orf_12	mobileOG_000359972	NA	WP_101501105.1	integration/excision	NA	Multiple	Homology	mag_34	contig_195	orf_12	85.5	407	3.62e-144	248	254	253	1	248	1	248	98	97.6	36	0	CC4
mobileOG_000355102|uvrA|WP_137194563.1|replication/recombination/repair|NA|Plasmid	mag_34_contig_213_orf_1	mobileOG_000355102	uvrA	WP_137194563.1	replication/recombination/repair	NA	Plasmid RefSeq	Homology	mag_34	contig_213	orf_1	81.7	1314	0	793	950	793	1	791	1	793	100	83.3	143	1	CC4
mobileOG_000282677|recA|WP_137194640.1|replication/recombination/repair|NA|Plasmid	mag_34_contig_228_orf_2	mobileOG_000282677	recA	WP_137194640.1	replication/recombination/repair	NA	Plasmid RefSeq	Homology	mag_34	contig_228	orf_2	82.7	570	1.11e-204	352	357	386	1	352	26	377	91.2	98.6	61	0	CC4
mobileOG_000373043|groL|WP_167624166.1|phage|replication,chaperone|Plasmid	mag_34_contig_22_orf_5	mobileOG_000373043	groL	WP_167624166.1	phage	replication,chaperone	Plasmid RefSeq	Homology	mag_34	contig_22	orf_5	87.3	880	0	543	548	546	1	539	1	543	99.5	98.4	65	2	CC4
mobileOG_000335122|uvrB|WP_065317499.1|replication/recombination/repair|NA|Multiple|Homology	mag_34_contig_230_orf_8	mobileOG_000335122	uvrB	WP_065317499.1	replication/recombination/repair	NA	Multiple	Homology	mag_34	contig_230	orf_8	85.2	1206	0	711	730	734	19	729	21	731	96.9	97.4	105	0	CC4
mobileOG_000342416|copR|WP_050528217.1|transfer|conjugation,relaxosome|Plasmid	mag_34_contig_246_orf_2	mobileOG_000342416	copR	WP_050528217.1	transfer	conjugation,relaxosome	Plasmid RefSeq	Homology	mag_34	contig_246	orf_2	81.9	397	7.54e-141	238	238	239	1	238	1	238	99.6	100	43	0	CC4
mobileOG_000057944|NA|B9KX40|integration/excision|NA|COMPASS|Homology	mag_34_contig_289_orf_1	mobileOG_000057944	NA	B9KX40	integration/excision	NA	COMPASS	Homology	mag_34	contig_289	orf_1	89.8	349	1.86e-121	187	331	188	115	301	1	187	99.5	56.5	19	0	CC4
mobileOG_000025697|ihfB|WP_005610003.1|integration/excision|regulation,lysis/lysogeny|Multiple|Manual	mag_34_contig_290_orf_3	mobileOG_000025697	ihfB	WP_005610003.1	integration/excision	regulation,lysis/lysogeny	Multiple	Manual	mag_34	contig_290	orf_3	80.4	156	3.98e-50	92	95	100	1	92	1	92	92	96.8	18	0	CC4
mobileOG_000748551|NA:Keyword|WP_114889167.1|integration/excision|NA|Plasmid	mag_34_contig_313_orf_6	mobileOG_000748551	NA:Keyword	WP_114889167.1	integration/excision	NA	Plasmid RefSeq	Keyword Search	mag_34	contig_313	orf_6	84.1	123	5.99e-36	63	235	64	1	63	1	63	98.4	26.8	10	0	CC4
mobileOG_000355332|groL|WP_040125132.1|phage|replication,chaperone|Plasmid	mag_34_contig_33_orf_31	mobileOG_000355332	groL	WP_040125132.1	phage	replication,chaperone	Plasmid RefSeq	Homology	mag_34	contig_33	orf_31	83.6	498	6.58e-175	317	542	317	1	317	1	317	100	58.5	52	0	FC4
mobileOG_000284819|copR|A0A0D5A0C6|transfer|conjugation,relaxosome|Multiple|Homology	mag_34_contig_38_orf_25	mobileOG_000284819	copR	A0A0D5A0C6	transfer	conjugation,relaxosome	Multiple	Homology	mag_34	contig_38	orf_25	89.1	414	6.62e-148	230	233	232	1	230	1	230	99.1	98.7	25	0	FC4
mobileOG_000282675|recA|WP_129393205.1|replication/recombination/repair|NA|Plasmid	mag_34_contig_53_orf_10	mobileOG_000282675	recA	WP_129393205.1	replication/recombination/repair	NA	Plasmid RefSeq	Homology	mag_34	contig_53	orf_10	80.2	560	1.82e-201	354	352	356	1	351	1	354	99.4	99.7	67	2	FC4
mobileOG_000351423|clpP|WP_137194577.1|phage|replication/recombination/repair|Plasmid	mag_34_contig_58_orf_2	mobileOG_000351423	clpP	WP_137194577.1	phage	replication/recombination/repair	Plasmid RefSeq	Homology	mag_34	contig_58	orf_2	83.7	340	2.36e-119	202	210	212	1	202	1	201	94.8	96.2	32	1	CC4
mobileOG_000347218|clpX|WP_137194578.1|phage|replication,chaperone|Plasmid	mag_34_contig_58_orf_3	mobileOG_000347218	clpX	WP_137194578.1	phage	replication,chaperone	Plasmid RefSeq	Homology	mag_34	contig_58	orf_3	86.6	719	3.21e-262	424	421	425	1	421	1	424	99.8	100	54	2	CC4
mobileOG_000276252|tnpA|A0A1X7LN74|integration/excision|NA|ISFinder|Homology	mag_34_contig_78_orf_13	mobileOG_000276252	tnpA	A0A1X7LN74	integration/excision	NA	ISFinder	Homology	mag_34	contig_78	orf_13	84.8	546	2.83e-197	310	310	311	1	310	1	310	99.7	100	47	0	CC4
mobileOG_000281921|dnaK|WP_146366878.1|phage|infection,regulation|Plasmid	mag_34_contig_93_orf_3	mobileOG_000281921	dnaK	WP_146366878.1	phage	infection,regulation	Plasmid RefSeq	Homology	mag_34	contig_93	orf_3	86.7	1053	0	639	639	637	1	637	1	634	99.5	99.7	78	3	CC4
mobileOG_000367183|trbC|WP_102114758.1|transfer|conjugation|Multiple|Homology	mag_36_contig_16_orf_113	mobileOG_000367183	trbC	WP_102114758.1	transfer	conjugation	Multiple	Homology	mag_36	contig_16	orf_113	82.7	156	1.34e-49	104	110	110	8	110	6	109	94.5	93.6	17	1	FC4
mobileOG_000039274|groS|Q3SQS2|phage|structural|ACLAME|Homology	mag_36_contig_20_orf_31	mobileOG_000039274	groS	Q3SQS2	phage	structural	ACLAME	Homology	mag_36	contig_20	orf_31	80.9	154	5.2e-49	94	104	96	1	94	1	94	97.9	90.4	18	0	FC4
mobileOG_000347218|clpX|WP_137194578.1|phage|replication,chaperone|Plasmid	mag_36_contig_26_orf_62	mobileOG_000347218	clpX	WP_137194578.1	phage	replication,chaperone	Plasmid RefSeq	Homology	mag_36	contig_26	orf_62	84	405	3.4e-141	244	421	244	1	242	1	244	100	57.5	37	2	FC4
mobileOG_000284819|copR|A0A0D5A0C6|transfer|conjugation,relaxosome|Multiple|Homology	mag_36_contig_41_orf_46	mobileOG_000284819	copR	A0A0D5A0C6	transfer	conjugation,relaxosome	Multiple	Homology	mag_36	contig_41	orf_46	91.1	414	1.06e-147	225	233	235	1	225	1	225	95.7	96.6	20	0	FC4
mobileOG_000302590|uvrA|WP_014197269.1|replication/recombination/repair|NA|Plasmid	mag_36_contig_5_orf_15	mobileOG_000302590	uvrA	WP_014197269.1	replication/recombination/repair	NA	Plasmid RefSeq	Homology	mag_36	contig_5	orf_15	84.7	145	5.23e-41	85	950	85	1	85	1	85	100	8.9	13	0	FC4
mobileOG_000355645|groL|WP_149346274.1|phage|replication,chaperone|Plasmid	mag_37_contig_116_orf_11	mobileOG_000355645	groL	WP_149346274.1	phage	replication,chaperone	Plasmid RefSeq	Homology	mag_37	contig_116	orf_11	83.5	877	0	546	547	547	1	546	1	543	99.3	99.8	87	1	CC4
mobileOG_000443185|NA:Keyword|A0A174NVL7|transfer|NA|GPD|Keyword	mag_38_contig_25_orf_82	mobileOG_000443185	NA:Keyword	A0A174NVL7	transfer	NA	GPD	Keyword Search	mag_38	contig_25	orf_82	81.2	113	7.39e-34	69	73	70	1	69	1	69	98.6	94.5	13	0	CC4
mobileOG_000740140|NA:Keyword|A0A316GQ27|stability/transfer/defense|NA|Plasmid	mag_39_contig_118_orf_2	mobileOG_000740140	NA:Keyword	A0A316GQ27	stability/transfer/defense	NA	Plasmid RefSeq	Keyword Search	mag_39	contig_118	orf_2	80.9	184	9.01e-58	115	338	117	1	115	1	115	98.3	34	22	0	CC4
mobileOG_000355312|groL|WP_025414977.1|phage|replication,chaperone|Multiple|Homology	mag_39_contig_54_orf_4	mobileOG_000355312	groL	WP_025414977.1	phage	replication,chaperone	Multiple	Homology	mag_39	contig_54	orf_4	83.3	847	1.31e-305	528	552	544	1	528	1	527	96.9	95.7	87	1	CC4
mobileOG_000022000|ihfA|WP_001229265.1|integration/excision|regulation,lysis/lysogeny|Multiple|Manual	mag_3_contig_110_orf_63	mobileOG_000022000	ihfA	WP_001229265.1	integration/excision	regulation,lysis/lysogeny	Multiple	Manual	mag_3	contig_110	orf_63	80.6	153	7.77e-49	93	99	101	1	93	1	93	92.1	93.9	18	0	MD4
mobileOG_000353330|ihfA|WP_016721764.1|phage|integration/excision|Multiple|Homology	mag_3_contig_16_orf_10	mobileOG_000353330	ihfA	WP_016721764.1	phage	integration/excision	Multiple	Homology	mag_3	contig_16	orf_10	82.4	149	7.91e-47	91	139	98	38	128	2	92	92.9	65.5	16	0	FD4
mobileOG_000443185|NA:Keyword|A0A174NVL7|transfer|NA|GPD|Keyword	mag_3_contig_356_orf_15	mobileOG_000443185	NA:Keyword	A0A174NVL7	transfer	NA	GPD	Keyword Search	mag_3	contig_356	orf_15	87.9	112	2.03e-33	66	73	69	1	66	1	66	95.7	90.4	8	0	FC4
mobileOG_000443185|NA:Keyword|A0A174NVL7|transfer|NA|GPD|Keyword	mag_3_contig_416_orf_6	mobileOG_000443185	NA:Keyword	A0A174NVL7	transfer	NA	GPD	Keyword Search	mag_3	contig_416	orf_6	85.3	109	2.38e-32	68	73	69	1	68	1	68	98.6	93.2	10	0	FC4
mobileOG_000353828|gyrA|WP_078223567.1|replication/recombination/repair|NA|Plasmid	mag_3_contig_61_orf_13	mobileOG_000353828	gyrA	WP_078223567.1	replication/recombination/repair	NA	Plasmid RefSeq	Homology	mag_3	contig_61	orf_13	80.3	801	7.13e-286	512	885	506	1	512	1	505	99.8	57.9	94	2	FD4
mobileOG_000355273|groL|WP_000719077.1|phage|replication,chaperone|Plasmid	mag_3_contig_69_orf_12	mobileOG_000355273	groL	WP_000719077.1	phage	replication,chaperone	Plasmid RefSeq	Homology	mag_3	contig_69	orf_12	81.6	833	3.7e-303	544	542	543	1	540	1	542	99.8	99.6	94	2	MD4
mobileOG_000199360|hfq|R7BYG7|phage|infection,regulation|GPD|Homology	mag_3_contig_95_orf_22	mobileOG_000199360	hfq	R7BYG7	phage	infection,regulation	GPD	Homology	mag_3	contig_95	orf_22	80.3	124	4.79e-38	76	79	79	4	79	2	76	94.9	96.2	14	1	FD4
mobileOG_000355646|groL|WP_149387129.1|phage|replication,chaperone|Plasmid	mag_40_contig_21_orf_57	mobileOG_000355646	groL	WP_149387129.1	phage	replication,chaperone	Plasmid RefSeq	Homology	mag_40	contig_21	orf_57	82.1	694	5.11e-250	447	541	448	1	447	1	447	99.8	82.6	80	0	CC4
mobileOG_000325586|thyA|WP_101087470.1|phage|replication,infection,regulation|Plasmid	mag_40_contig_23_orf_39	mobileOG_000325586	thyA	WP_101087470.1	phage	replication,infection,regulation	Plasmid RefSeq	Homology	mag_40	contig_23	orf_39	88.3	520	4.01e-188	274	274	292	1	274	18	291	93.8	100	32	0	CC4
mobileOG_000282641|recA|WP_047386304.1|replication/recombination/repair|NA|Plasmid	mag_40_contig_3_orf_8	mobileOG_000282641	recA	WP_047386304.1	replication/recombination/repair	NA	Plasmid RefSeq	Homology	mag_40	contig_3	orf_8	81.5	518	2.23e-185	325	333	335	7	331	8	330	96.4	97.6	58	2	CC4
mobileOG_000267316|mqsA|Q84ES4|stability/transfer/defense|NA|ICE|Homology	mag_4_contig_102_orf_5	mobileOG_000267316	mqsA	Q84ES4	stability/transfer/defense	NA	ICE	Homology	mag_4	contig_102	orf_5	80.5	229	1.23e-77	133	135	134	3	135	1	133	99.3	98.5	26	0	MD4
mobileOG_000355080|uvrA|WP_033636192.1|replication/recombination/repair|NA|Plasmid	mag_4_contig_140_orf_1	mobileOG_000355080	uvrA	WP_033636192.1	replication/recombination/repair	NA	Plasmid RefSeq	Homology	mag_4	contig_140	orf_1	80.1	246	4.23e-76	151	942	151	1	151	1	151	100	16	30	0	CD4
mobileOG_000369767|tISRso5-|WP_165105861.1|integration/excision|NA|Plasmid	mag_4_contig_166_orf_2	mobileOG_000369767	tISRso5-	WP_165105861.1	integration/excision	NA	Plasmid RefSeq	Homology	mag_4	contig_166	orf_2	88.6	627	6.44e-228	351	350	352	1	350	1	351	99.7	100	39	1	CD4
mobileOG_000443185|NA:Keyword|A0A174NVL7|transfer|NA|GPD|Keyword	mag_4_contig_170_orf_5	mobileOG_000443185	NA:Keyword	A0A174NVL7	transfer	NA	GPD	Keyword Search	mag_4	contig_170	orf_5	88.4	118	8.7e-36	69	73	73	1	69	1	69	94.5	94.5	8	0	CC4
mobileOG_000443185|NA:Keyword|A0A174NVL7|transfer|NA|GPD|Keyword	mag_4_contig_180_orf_17	mobileOG_000443185	NA:Keyword	A0A174NVL7	transfer	NA	GPD	Keyword Search	mag_4	contig_180	orf_17	85.7	115	1.45e-34	70	73	73	1	70	1	70	95.9	95.9	10	0	FD4
mobileOG_000022000|ihfA|WP_001229265.1|integration/excision|regulation,lysis/lysogeny|Multiple|Manual	mag_4_contig_29_orf_97	mobileOG_000022000	ihfA	WP_001229265.1	integration/excision	regulation,lysis/lysogeny	Multiple	Manual	mag_4	contig_29	orf_97	85.7	160	1.4e-51	91	99	101	2	92	3	93	90.1	91.9	13	0	CD4
mobileOG_000037549|tnpA|WP_011733816.1|integration/excision|NA|Multiple|Homology	mag_4_contig_92_orf_7	mobileOG_000037549	tnpA	WP_011733816.1	integration/excision	NA	Multiple	Homology	mag_4	contig_92	orf_7	83.2	498	9.9e-178	298	354	309	56	353	10	307	96.4	84.2	50	0	MD4
mobileOG_000294828|ftsH|WP_045871676.1|phage|infection,regulation|Plasmid	mag_5_contig_117_orf_4	mobileOG_000294828	ftsH	WP_045871676.1	phage	infection,regulation	Plasmid RefSeq	Homology	mag_5	contig_117	orf_4	85.9	1033	0	611	612	616	2	612	5	615	99.2	99.8	86	0	FD4
mobileOG_000443185|NA:Keyword|A0A174NVL7|transfer|NA|GPD|Keyword	mag_5_contig_124_orf_3	mobileOG_000443185	NA:Keyword	A0A174NVL7	transfer	NA	GPD	Keyword Search	mag_5	contig_124	orf_3	84.8	110	7.95e-33	66	73	68	1	66	1	66	97.1	90.4	10	0	CD4
mobileOG_000761728|NA:Keyword|A0A7Q0|integration/excision|NA|Multiple|Keyword	mag_5_contig_13_orf_12	mobileOG_000761728	NA:Keyword	A0A7Q0	integration/excision	NA	Multiple	Keyword Search	mag_5	contig_13	orf_12	82.4	321	4.77e-112	199	202	201	1	199	1	198	98.5	98.5	34	1	FD4
mobileOG_000337355|ndoA_1|WP_012593106.1|stability/transfer/defense|NA|Multiple|Homology	mag_5_contig_218_orf_10	mobileOG_000337355	ndoA_1	WP_012593106.1	stability/transfer/defense	NA	Multiple	Homology	mag_5	contig_218	orf_10	81.1	181	2.73e-59	111	112	112	1	111	1	111	99.1	99.1	21	0	FD4
mobileOG_000443185|NA:Keyword|A0A174NVL7|transfer|NA|GPD|Keyword	mag_5_contig_23_orf_2	mobileOG_000443185	NA:Keyword	A0A174NVL7	transfer	NA	GPD	Keyword Search	mag_5	contig_23	orf_2	84.8	110	7.95e-33	66	73	68	1	66	1	66	97.1	90.4	10	0	MC4
mobileOG_000353719|gyrB|WP_096582309.1|replication/recombination/repair|transfer|Plasmid	mag_5_contig_247_orf_1	mobileOG_000353719	gyrB	WP_096582309.1	replication/recombination/repair	transfer	Plasmid RefSeq	Homology	mag_5	contig_247	orf_1	82	1067	0	645	645	641	1	645	1	640	99.8	100	111	1	FD4
mobileOG_000414167|NA:Keyword|A0A2K8WTZ2|integration/excision|NA|COMPASS|Keyword	mag_5_contig_262_orf_14	mobileOG_000414167	NA:Keyword	A0A2K8WTZ2	integration/excision	NA	COMPASS	Keyword Search	mag_5	contig_262	orf_14	91.7	209	5.5e-67	109	398	110	290	398	1	109	99.1	27.4	9	0	FD4
mobileOG_000414167|NA:Keyword|A0A2K8WTZ2|integration/excision|NA|COMPASS|Keyword	mag_5_contig_263_orf_1	mobileOG_000414167	NA:Keyword	A0A2K8WTZ2	integration/excision	NA	COMPASS	Keyword Search	mag_5	contig_263	orf_1	80.2	298	1.91e-100	182	398	190	184	365	1	182	95.8	45.7	36	0	FD4
mobileOG_000414167|NA:Keyword|A0A2K8WTZ2|integration/excision|NA|COMPASS|Keyword	mag_5_contig_275_orf_1	mobileOG_000414167	NA:Keyword	A0A2K8WTZ2	integration/excision	NA	COMPASS	Keyword Search	mag_5	contig_275	orf_1	93.5	117	2.31e-32	62	398	63	337	398	1	62	98.4	15.6	4	0	FD4
mobileOG_000744308|NA:Keyword|WP_096388275.1|stability/transfer/defense|NA|Plasmid	mag_5_contig_282_orf_2	mobileOG_000744308	NA:Keyword	WP_096388275.1	stability/transfer/defense	NA	Plasmid RefSeq	Keyword Search	mag_5	contig_282	orf_2	86.6	202	8.2e-68	112	112	113	1	112	1	112	99.1	100	15	0	FD4
mobileOG_000281732|dnaK|WP_096732306.1|phage|infection,regulation|Plasmid	mag_5_contig_330_orf_7	mobileOG_000281732	dnaK	WP_096732306.1	phage	infection,regulation	Plasmid RefSeq	Homology	mag_5	contig_330	orf_7	82.3	976	0	639	636	640	1	636	1	639	99.8	100	110	2	FD4
mobileOG_000443185|NA:Keyword|A0A174NVL7|transfer|NA|GPD|Keyword	mag_5_contig_41_orf_1	mobileOG_000443185	NA:Keyword	A0A174NVL7	transfer	NA	GPD	Keyword Search	mag_5	contig_41	orf_1	86.4	112	2.77e-33	66	73	68	1	66	1	66	97.1	90.4	9	0	MC4
mobileOG_000335487|radA|WP_096541309.1|replication/recombination/repair|competence|Plasmid	mag_5_contig_422_orf_1	mobileOG_000335487	radA	WP_096541309.1	replication/recombination/repair	competence	Plasmid RefSeq	Homology	mag_5	contig_422	orf_1	84.3	415	2.2e-143	249	508	265	249	496	1	249	94	48.8	38	1	FD4
mobileOG_000306659|clpB|WP_096541098.1|phage|chaperone|Plasmid	mag_5_contig_48_orf_4	mobileOG_000306659	clpB	WP_096541098.1	phage	chaperone	Plasmid RefSeq	Homology	mag_5	contig_48	orf_4	88.4	1375	0	816	822	823	1	815	1	814	98.9	99.1	92	2	FD4
mobileOG_000275756|tnp|A0A3G9JN08|integration/excision|NA|ISFinder|Homology	mag_5_contig_52_orf_1	mobileOG_000275756	tnp	A0A3G9JN08	integration/excision	NA	ISFinder	Homology	mag_5	contig_52	orf_1	87.1	293	1.4e-97	163	494	171	176	338	1	163	95.3	33	21	0	FD4
mobileOG_000749089|NA:Keyword|WP_118171809.1|integration/excision|NA|Plasmid	mag_5_contig_57_orf_5	mobileOG_000749089	NA:Keyword	WP_118171809.1	integration/excision	NA	Plasmid RefSeq	Keyword Search	mag_5	contig_57	orf_5	92	172	2.48e-52	88	432	91	345	432	3	90	96.7	20.4	7	0	FD4
mobileOG_000030825|tISRso8a|A1SE78|integration/excision|NA|ACLAME|Homology	mag_6_contig_128_orf_5	mobileOG_000030825	tISRso8a	A1SE78	integration/excision	NA	ACLAME	Homology	mag_6	contig_128	orf_5	92.2	184	6.28e-61	103	103	104	1	103	1	103	99	100	8	0	FC4
mobileOG_000304824|clpB|WP_054009298.1|phage|chaperone|Multiple|Homology	mag_6_contig_133_orf_32	mobileOG_000304824	clpB	WP_054009298.1	phage	chaperone	Multiple	Homology	mag_6	contig_133	orf_32	87.5	579	4.28e-202	351	829	352	1	344	1	351	99.7	41.5	37	1	MD4
mobileOG_000059567|hfq|WP_035675971.1|phage|infection,regulation|Multiple|Homology	mag_6_contig_28_orf_37	mobileOG_000059567	hfq	WP_035675971.1	phage	infection,regulation	Multiple	Homology	mag_6	contig_28	orf_37	89.7	148	3.17e-47	78	82	84	3	80	4	81	92.9	95.1	8	0	MC4
mobileOG_000724247|NA:Keyword|A7HGL2|integration/excision|NA|ISFinder|Keyword	mag_6_contig_52_orf_5	mobileOG_000724247	NA:Keyword	A7HGL2	integration/excision	NA	ISFinder	Keyword Search	mag_6	contig_52	orf_5	89.3	293	4.28e-97	159	515	167	350	508	1	159	95.2	30.9	17	0	FC4
mobileOG_000347218|clpX|WP_137194578.1|phage|replication,chaperone|Plasmid	mag_6_contig_55_orf_9	mobileOG_000347218	clpX	WP_137194578.1	phage	replication,chaperone	Plasmid RefSeq	Homology	mag_6	contig_55	orf_9	80	657	1.96e-237	409	421	423	5	412	6	414	96.7	96.9	81	1	MC4
mobileOG_000317194|copR|WP_040134966.1|transfer|conjugation,relaxosome|Plasmid	mag_6_contig_75_orf_14	mobileOG_000317194	copR	WP_040134966.1	transfer	conjugation,relaxosome	Plasmid RefSeq	Homology	mag_6	contig_75	orf_14	91.6	416	3.88e-148	227	243	236	1	227	1	227	96.2	93.4	19	0	MC4
mobileOG_000334444|clpB|WP_094305554.1|phage|chaperone|Plasmid	mag_6_contig_91_orf_6	mobileOG_000334444	clpB	WP_094305554.1	phage	chaperone	Plasmid RefSeq	Homology	mag_6	contig_91	orf_6	80.5	1318	0	857	876	865	1	857	1	857	99.1	97.8	167	0	MC4
mobileOG_000355312|groL|WP_025414977.1|phage|replication,chaperone|Multiple|Homology	mag_7_contig_108_orf_56	mobileOG_000355312	groL	WP_025414977.1	phage	replication,chaperone	Multiple	Homology	mag_7	contig_108	orf_56	82.5	843	8.76e-305	543	552	544	1	542	1	542	99.6	98.2	93	2	CC4
mobileOG_000338808|BQ2027_MB1076;|WP_031349784.1|integration/excision|NA|Multiple|Homology	mag_7_contig_65_orf_1	mobileOG_000338808	BQ2027_MB1076;	WP_031349784.1	integration/excision	NA	Multiple	Homology	mag_7	contig_65	orf_1	87.1	720	1.48e-262	419	415	420	1	415	1	419	99.8	100	50	1	CC4
mobileOG_000374209|virB3|WP_018065947.1|transfer|conjugation|Multiple|Homology	mag_8_contig_10_orf_1	mobileOG_000374209	virB3	WP_018065947.1	transfer	conjugation	Multiple	Homology	mag_8	contig_10	orf_1	96.7	184	2.82e-61	92	92	93	1	92	1	92	98.9	100	3	0	FC4
mobileOG_000409660|NA:Keyword|WP_043872335.1|transfer|NA|COMPASS|Keyword	mag_8_contig_10_orf_2	mobileOG_000409660	NA:Keyword	WP_043872335.1	transfer	NA	COMPASS	Keyword Search	mag_8	contig_10	orf_2	92.3	167	3.46e-54	104	104	105	1	104	1	104	99	100	8	0	FC4
mobileOG_000371198|virD4|WP_164517412.1|transfer|conjugation|Plasmid	mag_8_contig_114_orf_1	mobileOG_000371198	virD4	WP_164517412.1	transfer	conjugation	Plasmid RefSeq	Homology	mag_8	contig_114	orf_1	97.8	755	1.41e-273	408	614	409	207	614	1	408	99.8	66.4	9	0	FC4
mobileOG_000367609|virB11|WP_125327843.1|transfer|conjugation|Plasmid	mag_8_contig_114_orf_2	mobileOG_000367609	virB11	WP_125327843.1	transfer	conjugation	Plasmid RefSeq	Homology	mag_8	contig_114	orf_2	99.7	631	1.74e-230	324	324	325	1	324	1	324	99.7	100	1	0	FC4
mobileOG_000750027|NA:Keyword|WP_125327842.1|transfer|NA|Plasmid	mag_8_contig_114_orf_3	mobileOG_000750027	NA:Keyword	WP_125327842.1	transfer	NA	Plasmid RefSeq	Keyword Search	mag_8	contig_114	orf_3	97.3	414	1.48e-144	226	440	227	215	440	1	226	99.6	51.4	6	0	FC4
mobileOG_000324878|trbB|WP_029074262.1|transfer|conjugation|Plasmid	mag_8_contig_115_orf_4	mobileOG_000324878	trbB	WP_029074262.1	transfer	conjugation	Plasmid RefSeq	Homology	mag_8	contig_115	orf_4	81.5	475	1.14e-168	313	331	326	7	319	7	318	95.7	94.6	57	1	FC4
mobileOG_000282675|recA|WP_129393205.1|replication/recombination/repair|NA|Plasmid	mag_8_contig_116_orf_32	mobileOG_000282675	recA	WP_129393205.1	replication/recombination/repair	NA	Plasmid RefSeq	Homology	mag_8	contig_116	orf_32	82.9	552	3.35e-198	339	352	360	13	350	17	355	94.2	96	57	1	FC4
mobileOG_000274935|tnpA|A0A522X142|integration/excision|NA|ISFinder|Homology	mag_8_contig_121_orf_20	mobileOG_000274935	tnpA	A0A522X142	integration/excision	NA	ISFinder	Homology	mag_8	contig_121	orf_20	82.2	573	7.09e-207	338	343	342	1	338	1	336	98.2	98.5	58	1	MD4
mobileOG_000073832|tnpA|A0A1D8AFC2|integration/excision|NA|COMPASS|Homology	mag_8_contig_121_orf_3	mobileOG_000073832	tnpA	A0A1D8AFC2	integration/excision	NA	COMPASS	Homology	mag_8	contig_121	orf_3	80.4	167	6.35e-54	107	107	109	1	107	1	107	98.2	100	21	0	FC4
mobileOG_000346970|NA|A0A2A3MNV6|integration/excision|NA|Plasmid	mag_8_contig_121_orf_4	mobileOG_000346970	NA	A0A2A3MNV6	integration/excision	NA	Plasmid RefSeq	Homology	mag_8	contig_121	orf_4	90.3	563	9.78e-203	300	409	301	110	409	1	300	99.7	73.3	29	0	FC4
mobileOG_000736547|NA:Keyword|A0A2D8D263|integration/excision|NA|Plasmid	mag_8_contig_131_orf_1	mobileOG_000736547	NA:Keyword	A0A2D8D263	integration/excision	NA	Plasmid RefSeq	Keyword Search	mag_8	contig_131	orf_1	86.2	377	7.59e-134	210	210	211	1	210	1	210	99.5	100	29	0	FC4
mobileOG_000284819|copR|A0A0D5A0C6|transfer|conjugation,relaxosome|Multiple|Homology	mag_8_contig_133_orf_31	mobileOG_000284819	copR	A0A0D5A0C6	transfer	conjugation,relaxosome	Multiple	Homology	mag_8	contig_133	orf_31	87.1	406	1.49e-144	233	233	232	1	233	1	231	99.6	100	28	1	FC4
mobileOG_000355646|groL|WP_149387129.1|phage|replication,chaperone|Plasmid	mag_8_contig_144_orf_14	mobileOG_000355646	groL	WP_149387129.1	phage	replication,chaperone	Plasmid RefSeq	Homology	mag_8	contig_144	orf_14	80	182	8.39e-55	115	541	117	2	116	3	117	98.3	21.3	23	0	CD4
mobileOG_000022000|ihfA|WP_001229265.1|integration/excision|regulation,lysis/lysogeny|Multiple|Manual	mag_8_contig_16_orf_4	mobileOG_000022000	ihfA	WP_001229265.1	integration/excision	regulation,lysis/lysogeny	Multiple	Manual	mag_8	contig_16	orf_4	80.4	147	2.8e-46	92	99	99	1	92	1	92	92.9	92.9	18	0	MD4
mobileOG_000055792|noc_1|WP_058908422.1|stability/transfer/defense|NA|Multiple|Homology	mag_8_contig_18_orf_1	mobileOG_000055792	noc_1	WP_058908422.1	stability/transfer/defense	NA	Multiple	Homology	mag_8	contig_18	orf_1	80	135	2.23e-40	80	220	87	21	100	7	86	92	36.4	16	0	MD4
mobileOG_000262678|hin_5|U3GDC8|integration/excision|NA|GPD|Homology	mag_8_contig_18_orf_22	mobileOG_000262678	hin_5	U3GDC8	integration/excision	NA	GPD	Homology	mag_8	contig_18	orf_22	83.2	780	6.52e-285	458	459	460	1	458	1	458	99.6	99.8	77	0	MD4
mobileOG_000299826|hsdR|WP_149505466.1|stability/transfer/defense|NA|Plasmid	mag_8_contig_198_orf_14	mobileOG_000299826	hsdR	WP_149505466.1	stability/transfer/defense	NA	Plasmid RefSeq	Homology	mag_8	contig_198	orf_14	80.6	1615	0	1012	1013	1008	1	1012	5	1006	99.4	99.9	186	3	MD4
mobileOG_000330971|trbE|WP_069049234.1|transfer|conjugation|Multiple|Homology	mag_8_contig_214_orf_1	mobileOG_000330971	trbE	WP_069049234.1	transfer	conjugation	Multiple	Homology	mag_8	contig_214	orf_1	80.3	956	0	609	818	615	205	810	1	607	98.7	74.1	115	2	FC4
mobileOG_000346942|hup|A0A0M3ALA6|phage|replication/recombination/repair|Plasmid	mag_8_contig_228_orf_29	mobileOG_000346942	hup	A0A0M3ALA6	phage	replication/recombination/repair	Plasmid RefSeq	Homology	mag_8	contig_228	orf_29	80.2	145	6.73e-46	91	91	92	1	91	1	91	98.9	100	18	0	FC4
mobileOG_000277011|NA|D6CS22|integration/excision|NA|ISFinder|Homology	mag_8_contig_236_orf_3	mobileOG_000277011	NA	D6CS22	integration/excision	NA	ISFinder	Homology	mag_8	contig_236	orf_3	81.7	422	1.1e-149	268	271	271	4	271	3	270	98.9	98.9	49	0	FC4
mobileOG_000443185|NA:Keyword|A0A174NVL7|transfer|NA|GPD|Keyword	mag_8_contig_237_orf_4	mobileOG_000443185	NA:Keyword	A0A174NVL7	transfer	NA	GPD	Keyword Search	mag_8	contig_237	orf_4	88.2	115	1.57e-34	68	73	75	1	68	1	68	90.7	93.2	8	0	CD4
mobileOG_000743547|NA:Keyword|WP_012806696.1|stability/transfer/defense|NA|Multiple|Keyword	mag_8_contig_30_orf_59	mobileOG_000743547	NA:Keyword	WP_012806696.1	stability/transfer/defense	NA	Multiple	Keyword Search	mag_8	contig_30	orf_59	82.6	194	1.35e-64	109	113	113	4	112	2	110	96.5	96.5	19	0	MD4
mobileOG_000333798|tssB|WP_100923239.1|replication/recombination/repair|NA|Multiple|Homology	mag_8_contig_33_orf_28	mobileOG_000333798	tssB	WP_100923239.1	replication/recombination/repair	NA	Multiple	Homology	mag_8	contig_33	orf_28	83	280	1.47e-96	165	178	175	1	165	1	165	94.3	92.7	28	0	MD4
mobileOG_000353791|parC|WP_039569308.1|replication/recombination/repair|partitioning|Plasmid	mag_8_contig_35_orf_1	mobileOG_000353791	parC	WP_039569308.1	replication/recombination/repair	partitioning	Plasmid RefSeq	Homology	mag_8	contig_35	orf_1	80	350	1.11e-115	210	757	217	7	216	8	217	96.8	27.7	42	0	MD4
mobileOG_000739916|NA:Keyword|A0A0S4UV05|stability/transfer/defense|NA|Plasmid	mag_8_contig_41_orf_2	mobileOG_000739916	NA:Keyword	A0A0S4UV05	stability/transfer/defense	NA	Plasmid RefSeq	Keyword Search	mag_8	contig_41	orf_2	88.8	148	5.76e-47	89	91	92	1	89	1	89	96.7	97.8	10	0	MD4
mobileOG_000747241|NA:Keyword|WP_106708106.1|stability/transfer/defense|NA|Plasmid	mag_8_contig_41_orf_3	mobileOG_000747241	NA:Keyword	WP_106708106.1	stability/transfer/defense	NA	Plasmid RefSeq	Keyword Search	mag_8	contig_41	orf_3	81.4	189	1.35e-62	113	113	114	1	113	1	113	99.1	100	21	0	MD4
mobileOG_000322790|slt_1|WP_131389204.1|transfer|conjugation|Plasmid	mag_8_contig_45_orf_1	mobileOG_000322790	slt_1	WP_131389204.1	transfer	conjugation	Plasmid RefSeq	Homology	mag_8	contig_45	orf_1	91.8	276	2.43e-92	159	388	159	1	159	1	159	100	41	13	0	FC4
mobileOG_000730467|NA:Keyword|A0A2T7UKF4|transfer|NA|Plasmid	mag_8_contig_45_orf_3	mobileOG_000730467	NA:Keyword	A0A2T7UKF4	transfer	NA	Plasmid RefSeq	Keyword Search	mag_8	contig_45	orf_3	96.1	1500	0	798	798	799	1	798	1	798	99.9	100	31	0	FC4
mobileOG_000281921|dnaK|WP_146366878.1|phage|infection,regulation|Plasmid	mag_8_contig_50_orf_9	mobileOG_000281921	dnaK	WP_146366878.1	phage	infection,regulation	Plasmid RefSeq	Homology	mag_8	contig_50	orf_9	80.4	394	9.74e-134	250	639	250	1	249	1	250	100	39	48	1	FC4
mobileOG_000355272|groL|WP_000719078.1|phage|replication,chaperone|Multiple|Homology	mag_8_contig_57_orf_22	mobileOG_000355272	groL	WP_000719078.1	phage	replication,chaperone	Multiple	Homology	mag_8	contig_57	orf_22	80	809	1.6e-293	536	545	543	1	536	1	536	98.7	98.3	107	0	MD4
mobileOG_000312441|pilT|WP_043095750.1|transfer|conjugation,competence|Plasmid	mag_8_contig_5_orf_4	mobileOG_000312441	pilT	WP_043095750.1	transfer	conjugation,competence	Plasmid RefSeq	Homology	mag_8	contig_5	orf_4	83.7	580	8.04e-210	344	345	346	1	344	1	344	99.4	99.7	56	0	MD4
mobileOG_000724631|NA:Keyword|CBH98680.1|integration/excision|NA|ISFinder|Keyword	mag_8_contig_6_orf_6	mobileOG_000724631	NA:Keyword	CBH98680.1	integration/excision	NA	ISFinder	Keyword Search	mag_8	contig_6	orf_6	86	179	2.41e-55	93	407	94	315	407	1	93	98.9	22.9	13	0	MD4
mobileOG_000063144|NA|WP_107320815.1|integration/excision|NA|COMPASS|Homology	mag_8_contig_73_orf_1	mobileOG_000063144	NA	WP_107320815.1	integration/excision	NA	COMPASS	Homology	mag_8	contig_73	orf_1	80.3	118	4.55e-33	71	300	72	230	300	1	71	98.6	23.7	14	0	MD4
mobileOG_000724631|NA:Keyword|CBH98680.1|integration/excision|NA|ISFinder|Keyword	mag_8_contig_74_orf_1	mobileOG_000724631	NA:Keyword	CBH98680.1	integration/excision	NA	ISFinder	Keyword Search	mag_8	contig_74	orf_1	91.1	665	3.01e-242	360	407	360	1	360	1	360	100	88.5	32	0	MD4
mobileOG_000373423|NA|WP_167622151.1|integration/excision|NA|Plasmid	mag_8_contig_79_orf_10	mobileOG_000373423	NA	WP_167622151.1	integration/excision	NA	Plasmid RefSeq	Homology	mag_8	contig_79	orf_10	89.8	457	6.79e-164	266	264	266	1	264	1	265	99.6	100	24	2	FC4
mobileOG_000724631|NA:Keyword|CBH98680.1|integration/excision|NA|ISFinder|Keyword	mag_8_contig_7_orf_1	mobileOG_000724631	NA:Keyword	CBH98680.1	integration/excision	NA	ISFinder	Keyword Search	mag_8	contig_7	orf_1	86	179	1.71e-55	93	407	94	315	407	1	93	98.9	22.9	13	0	MD4
mobileOG_000724631|NA:Keyword|CBH98680.1|integration/excision|NA|ISFinder|Keyword	mag_8_contig_93_orf_19	mobileOG_000724631	NA:Keyword	CBH98680.1	integration/excision	NA	ISFinder	Keyword Search	mag_8	contig_93	orf_19	82.4	126	4.13e-35	85	407	85	1	85	1	85	100	20.9	15	0	MD4
mobileOG_000290466|insI3|WP_063500981.1|integration/excision|NA|Multiple|Homology	mag_8_contig_94_orf_1	mobileOG_000290466	insI3	WP_063500981.1	integration/excision	NA	Multiple	Homology	mag_8	contig_94	orf_1	88.9	138	3,00E-40	81	341	82	180	260	1	81	98.8	23.8	9	0	MD4
mobileOG_000740960|NA:Keyword|WP_013094655.1|integration/excision|NA|Multiple|Keyword	mag_8_contig_95_orf_3	mobileOG_000740960	NA:Keyword	WP_013094655.1	integration/excision	NA	Multiple	Keyword Search	mag_8	contig_95	orf_3	87.9	115	7.1e-33	66	208	67	143	208	1	66	98.5	31.7	8	0	FC4
mobileOG_000724631|NA:Keyword|CBH98680.1|integration/excision|NA|ISFinder|Keyword	mag_8_contig_98_orf_1	mobileOG_000724631	NA:Keyword	CBH98680.1	integration/excision	NA	ISFinder	Keyword Search	mag_8	contig_98	orf_1	83.3	109	2.58e-29	60	407	61	348	407	1	60	98.4	14.7	10	0	MD4
mobileOG_000373562|groS|A0A142M9W2|phage|structural|Plasmid	mag_8_contig_99_orf_49	mobileOG_000373562	groS	A0A142M9W2	phage	structural	Plasmid RefSeq	Homology	mag_8	contig_99	orf_49	81.7	155	1.51e-49	93	98	96	6	98	3	95	96.9	94.9	17	0	FC4
mobileOG_000443185|NA:Keyword|A0A174NVL7|transfer|NA|GPD|Keyword	mag_9_contig_77_orf_2	mobileOG_000443185	NA:Keyword	A0A174NVL7	transfer	NA	GPD	Keyword Search	mag_9	contig_77	orf_2	86.2	111	3.94e-33	65	73	68	1	65	1	65	95.6	89	9	0	FC4
