# Supplementary material
Source: Research Square preprint supplement (doi:10.21203/rs.3.rs-8368209/v1)
Supplement: Supplementary file 3 [file d0be925c59cb0671a9a3c9e8.xlsx]

## Sheet: motive active site
Supplementary table 5: For classes Bla B1, Bla A and Bla D: gene name and the sequence motive of the active site
Gene BlaB1	gene	Motive of active site
	AFM/25-52, NDM/28-55	AVVT HAHQDKMGG...PGHTS...GGCLI...MSHSA
	ALI/20-47	TVFT HFHEDQTGG...PGHSK...GGCLM...PGHGD
	DIM/19-46	SVST HWHEDRTAG...GGHTI...GGCFV...PGHGK
	TMB/18-45	SIST HSHEDKTAG...GGHTI...GGCFI...PGHGK
	TTU/19-46	SIST HSHEDRTAG...GGHTI...GGCLV...PGHGK
	SHD/44-71	SVST HSHEDRTAG...GGHAL...GGCLV...PGHGE
	GIM/19-46	SIST HSHGDRTAG...AGHTE...GGCLV...PGHGK
	GRD/21-48	SIST HSHDDRTAG...AGHAP...GGCLI...PGHGE
	HMB/19-46	SIST HFHDDSTIG...AGHTP...GGCFV...PGHGT
	KHM/19-46	SIST HFHSDSTGG...AGHTS...GGCFV...PGHGK
	IMP/19-46	SISS HFHSDSSGG...PGHTQ...GGCFV...PSHSD
	SIM/19-46	SIST HFHDDSTAG...PGHTQ...GGCFI...PSHSE
	PST/20-47	SVST HFHDDRTAG...AGHSV...GGCFV...PGHGV
	SHN/19-46	VIVT HFHQDSSGG...AGHTQ...GGCLV...PGHGQ
	VAM/23-50	AIVT HFHEDASGD...PGHTE...GGCFV...PGHGQ
	VMB/19-46	AVVT HFHEDASGD...AGHTE...GGCFV...PGHGE
	SFB/9-36	SIST HSHQDRAGG...AGHTV...GGCLI...PGHGK
	SLB/9-36	SIST HSHQDRAGG...AGHTK...GGCLI...PGHGQ
	VIM/20-47	AVST HFHDDRVGG...AAHST...GGCAV...PGHGL
	BMHC/23-50, lcl|UZX27393.1|BMHC-1|/23-50 , ALG03680.1/22-49	IIPT HFHDDCLGG...EGHTK...GGCLI...PGHGE
	KJADEL_02581/22-49	IIPT HFHDDCLGG...EGHTV...GGCLL...PGHGK
	MFZ1517655.1/22-49	IIPG HFHDDCLGG...EGHTR...GGCLI...PGHGE
	CHM/22-49, lcl|CAH0243465.1|CHM-1|/22-49	VIPT HFHDDSSGG...EGHTK...GGCLL...PGHGE
	lcl|UVT38118.1|CEMC19-1|/22-49	IIPT HFHDDSLGG...EGHTK...GGCLL...PGHGD
	MBS4064029.1/22-49	IIPT HFHDDCLGG...EGHTK...GGCLL...PGHGK
	CIM/21-48	VVAT HFHNDCLGG...EGHTK...GGCLI...PGHGD
	MYO/20-47	LIPT HFHDDCIGG...EGHTK...GGCLI...PGHGK
	ZOG/21-48, lcl|CAZ94871.1|ZOG-1|/21-48 , |ZOG-1/21-48	VVIN HFHDDCLGG...EAHTK...GGCAL...PGHGE
	EMEIML_01904	VVIN HFHKDCLGG...EGHTR...GGCLI...PGHGA
	MBL7829243.1/79-106	VVVN HFHTDCLGG...EGHTR...GGCMI...PGHGE
	HRJ15628.1/18-45	VVIN HFHEDCLGG...AGHTL...GGCLV...PGHGA
	ECV/19-46	VVAT HFHLDCLGG...EGHTQ...GGCLI...PGHGN
	ORR/24-51	VVPT HFHDDNLGG...KGHTE...GGCLV...PGHGK
	CcrA/19-46	FIPN HWHGDCIGG...GGHAT...GGCML...PGHGD
	CfiA/19-46	FIPN HWHGDCIGG...GGHAT...GGCML...PGHGN
	DYB/19-46	VIPT HWHEDRMGG...GGHTT...GGCFI...PGHGN
	Bla/22-49	VIIT HAHADRIGG...KGHTE...GGCLV...PGHGE
	BlaB/20-47, Chryseobacterium/20-47	NIAT HSHDDRAGG...KGHTA...GGCII...AGHDD
	CAM/18-45, lcl|AVX51087.1|CAM-1|/18-45, lcl|MCD9185600.1|CAM-2|/18-45	SVST HFHEDRTNG...EGHAP...GGCFI...PGHDG
	DMFMPA_00572/19-46	CFAT HWHSDKTAG...PGHTE...GGCLI...IAHSD
	LLAFKC_00312/18-45 , MDO9256145.1/18-45	CFAT HWHSDKTAG...QGHTE...GGCLI...IAHSD
	MBK8088584.1/18-45	CFAT HWHSDKTAG...QGHTE...GGCLI...VAHSD
	HYG37245.1/13-40	CFAT HWHSDKTAG...PGHTE...GGCLI...TAHSD
	AHHAAO_01473/18-45, NHIBLG_01424/18-45	AFAT HWHSDKTAG...EGHTL...GGCLI...IAHHD
	CLPOHO_02178/18-45, MDE3145202.1/18-45	CIAT HWHSDRTEG...EGHTA...GGCLI...ISHSD
	MBL0359091.1/18-45	CIAT HWHSDRTEG...QGHAA...GGCLI...ISHSD
	JOHN/18-45	LFGT HSHEDRAGG...KGHAP...GGCFV...SGHDD
	PEDO/18-45	AIAT HSHGDRAGG...KGHTK...GGCLI...TGHAW
	gi|762020442|gb|AJP77076.1|PEDO-3/18-45	AIAT HSHGDRAGG...KGHTK...GGCLI...TGHAA
	MOC/18-45	VITT HFHEDRSGG...EGHSK...GGCLI...PGHDN
	TUS/18-45	VITT HFHEDRSGG...EGHSK...GGCLI...PGHDA
	MUS/18-45	VITT HFHEDRSGG...EGHSL...GGCLI...PGHDE
	CGB/22-49	VFAT HSHEDRAGD...EGHTA...GGCLV...PGHDE
	IND/21-48	VFAT HSHDDRAGD...EGHTA...GGCLV...PGHDE
	EBR/16-43	VFAT HSHDDRAGD...EGHTS...GGCLI...PGHDN
	FIA/20-47	CIVT HSHDDKVGG...EGHTV...GGCFV...PGHEE
	ANA/21-48	LIVT HWHADRMGG...HGHTA...AGCFV...PGHGA
	MYX/23-50	AVVT HFHEDRLGG...AGHAK...GGCFV...PGHGQ
	SPN/27-54	SIST HFHDDRLGG...PGHSP...GGCFV...PGHGA
	STA/30-57	GVAT HFHADRTGG...PGHAP...GGCMV...PGHGE
	crxA/21-48	CVVD RWHPDAMGG...EAHTK...GGNQV...PGHGH
	GMB/17-44	AVNT HFHSDGTGG...EGHTS...GGCLI...PGHGP
	SPM/28-55	AINT HFHLDGTGG...PAHSP...GGCMI...PGHGE
	SPS/27-54	EINT GYHVDNLGG...ETHAP...GGCML...PGHGI
Bla A	gene	motive active site
	KHIGKK_00431/68-78, HFFIAI_03051/68-78, WP_163433087.1/67-77 , HEY4874252.1/67-77 , RATA/68-78, gb|WFS34552.1|+|RATA-1/68-78 , CIA/62-72, RAA/62-72, CME/63-73, CblA/66-76, CfxA/83-93	SVFK...SDN...KTGS
	WP_286385637.1/67-77, WP_416846311.1/67-77 , HMN33312.1/67-77, MBL0105859.1/67-77 , MBK8380737.1/67-77, MBK6538520.1/67-77 , MBK9405894.1/67-77, CSP/74-84, SPU/62-72, PER/71-81, CepA/66-76, cepA/66-76, LRA/101-111, FPH/62-72	SVFK...SDN...KTGT
	HMK05798.1/73-83, PAOLOM_00964/42-52, MBL7776719.1/68-78, WP_154469535.1/68-78, RATA-2/68-78 , MBK7736138.1/68-78 , WP_185654186.1/68-78, MCT3711331.1/68-78, MCU0344663.1/68-78	SVFK...SDN...KTGW
	VEB/68-78, gb|QWO25673.1|+|VEB-29/68-78	SVMK...TDN...KTGT
	CGA/62-72, EXO/89-99	SVFK...SDN...KTGA
	TLA/73-83	SVYK...SDN...KTGT
	LUS/70-80	SVYK...SDN...KTGS
	ASU/90-100, SSA/89-99	SVYK...SDG...KTGT
	RASA/68-78	STFK...SDN...RAGT
	MUN/72-82	SVFK...SDN...KTGR
	AAK/66-76	RTFT...SDT...KTGA
	SHV/66-76, OHIO/66-76, LEN/66-76, OKP/66-76, GIL/66-76, ORN/66-76, PLA/66-76, TER/66-76, RUB/66-76, LAP/67-77, KBL/64-74, HER/70-80, LRG/78-88, BOR/80-90	STFK...SDN...KTGA
	TEM/68-78, PSV/74-84, ROB/86-96	STFK...SDN...KSGA
	AER/83-93, CKO/66-76, MAL/66-76	STHK...SDN...KTGA
	CARB/65-75, GMA/61-71, VHH/62-72, VHW/62-72	STFK...SDN...RSGA
	SCO/71-81	STSK...SDN...RTGA
	RCP/74-84	STVK...SDN...KSGS
	ACI/66-76	STHK...SDN...KSGS
	CBP/87-97	STFK...SDN...KSGT
	BCL/87-97	SAHK...SDN...KTGA
	BcI/89-99, Bla/92-102	STYK...SDN...KSGA
	BcIII/95-105	STSK...SDS...KTGA
	R/86-96	STHK...SDN...KTGG
	AST/91-101, ERP/75-85, blaF/75-85, blaS/72-82, BEL/62-72, RSA/65-75, SGM/95-105, PME/78-88	STFK...SDN...KTGS
	FAR/78-88, PAD/76-86	STFK...SDN...KTGG
	BES/68-78, LUT/76-86, PEN/83-93, BKC/92-102, GPC/76-86, CAE/76-86, GES/64-74	STFK...SDN...KTGT
	CTX/73-83, KLUG/73-83, FONA/77-87, SFO/77-87, KLUC/73-83, RAHN/77-87	STSK...SDN...KTGS
	OXY/72-82	STGK...SDN...KTGA
	SED/77-87	STSK...SDN...KTGA
	BIC/73-83, SFC/74-84, CRH/67-77, CRP/69-79, KPC/69-79, VCC/62-72, FLC/73-83, FRI/69-79, AXC/79-89, PAU/74-84	SSFK...SDN...KTGT
	IMI/71-81, SME/73-83	SSFK...SDN...KTGS
	DES/87-97	STFK...SDN...KSGS
	blaC/84-94	STFK...SDG...KTGT
	HBL/78-88	STFK...GDN...RTGA
	ARL/63-73	STFK...SDN...KSGQ
	PC/63-73	STSK...SDN...KSGQ
	mecC/63-73	STLK...SDN...KSGQ
	FTU/61-71	SVFK...SDS...KTGT
	BRO/90-100	STIK...SDN...KTGT
Bla D	gene	motive active site
	OXA-296/86-96, OXA-666/86-96, OXA-895/78-88, OXA-230/78-88, OXA-300/78-88, OXA-953/78-88, OXA-356/78-88, OXA-355/78-88, OXA-1052/78-88, OXA-952/78-88, OXA-1001/78-88, OXA-1193/78-88, OXA-930/78-88, OXA-983/78-88, OXA-1190/78-88, OXA-1144/78-88, OXA-418/78-88, OXA-301/78-88, OXA-931/78-88, OXA-1194/78-88, OXA-228/78-88, OXA-229/78-88, OXA-257/78-88, OXA-1191/78-88, OXA-669/81-91, OXA-944/83-93, OX…	sequence
	OXA-981/81-91, OXA-308/81-91, OXA-999/81-91	STFKFGNKSGW
	OXA-298/89-99, OXA-297/89-99, OXA-996/82-92, OXA-998/82-92, OXA-984/82-92, OXA-1004/82-92, OXA-995/82-92, OXA-982/82-92, OXA-295/82-92, OXA-994/82-92, OXA-997/82-92, OXA-993/82-92, OXA-294/82-92, OXA-288/84-94, OXA-286/84-94, OXA-1215/84-94, OXA-673/84-94, OXA-672/84-94, OXA-1145/84-94, OXA-674/84-94, OXA-303/84-94, OXA-287/82-92, OXA-671/84-94, OXA-293/82-92, OXA-292/82-92, OXA-291/82-92, OXA-30…	STFKYGNKSGL
	OXA-1075/80-90	STFKYGNKSGW
	OXA-1064/80-90	STFKYGNESGW
	OXA-425/80-90	STFKYGNQSGW
	OXA-1079/80-90	STLKYGNKSGW
	OXA-986/79-89	STFKYSNKSGW
	OXA-359/79-89	STFKFSNKSGW
	OXA-481/79-89, OXA-105/79-89, OXA-813/79-89, OXA-811/79-89, OXA-810/79-89, OXA-165/79-89, OXA-167/79-89, OXA-169/79-89, OXA-435/79-89, OXA-168/79-89, OXA-1223/79-89, OXA-170/79-89, OXA-423/79-89, OXA-366/79-89, OXA-166/79-89, OXA-171/79-89, OXA-483/79-89, OXA-27/79-89, OXA-73/79-89, OXA-482/79-89, OXA-398/79-89, OXA-225/79-89, OXA-1241/79-89, OXA-1236/79-89, OXA-440/79-89, OXA-893/79-89, OXA-422/…	SIFKFGNKSGW
	OXA-85/57-67	STFKFGNKTGW
	OXA-470/70-80, OXA-1101/70-80, OXA-1100/70-80, OXA-479/70-80, OXA-136/70-80, OXA-471/70-80, OXA-137/70-80, OXA-473/70-80, OXA-474/70-80, OXA-1099/70-80, OXA-476/70-80, OXA-475/70-80, OXA-477/70-80, OXA-472/70-80, OXA-478/70-80, OXA-192/70-80, OXA-63/70-80, OXA-1103/70-80, OXA-1107/70-80, OXA-1102/70-80, OXA-1106/70-80, OXA-1104/70-80, OXA-1105/70-80	SSFKYGNKTGW
	OXA-576/58-68, OXA-631/58-68, OXA-632/58-68, OXA-465/58-68, OXA-184/58-68, OXA-185/58-68, OXA-627/58-68, OXA-630/58-68, OXA-466/58-68, OXA-785/58-68, OXA-625/58-68, OXA-626/58-68, OXA-629/58-68, OXA-633/58-68, OXA-634/58-68, OXA-636/58-68, OXA-449/58-68, OXA-635/58-68, OXA-448/58-68, OXA-623/58-68, OXA-783/58-68, OXA-622/58-68, OXA-624/58-68, OXA-640/58-68, OXA-639/58-68, OXA-638/58-68, OXA-446/5…	STFKFGNKTGL
	OXA-628/58-68	STFKYGNKTGF
	OXA-586/58-68	STFKCGNKTGF
	OXA-493/58-67, OXA-518/58-67, OXA-928/67-76, OXA-1089/89-98	STFKYDNKTGF
	OXA-837/96-106, OXA-485/66-76, OXA-906/66-76, OXA-1022/66-76, OXA-1268/66-76, OXA-1274/66-76, OXA-851/66-76, OXA-395/66-76, OXA-1124/66-76, OXA-1027/66-76, OXA-1035/66-76, OXA-1032/66-76, OXA-846/66-76, OXA-1246/66-76, OXA-1289/66-76, OXA-905/66-76, OXA-1295/66-76, OXA-1273/66-76, OXA-1174/66-76, OXA-1024/66-76, OXA-849/66-76, OXA-1300/66-76, OXA-1031/66-76, OXA-1030/66-76, OXA-848/66-76, OXA-488…	STFKYGNKTG-
	MSI-OXA/80-90, OXA-1206/75-85, OXA-464/63-73, OXA-1108/63-73, OXA-491/63-73, OXA-20/72-82, OXA-37/72-82, OXA-34/72-82, OXA-210/72-82, OXA-15/72-82, OXA-1049/72-82, OXA-1183/72-82, OXA-141/72-82, OXA-415/72-82, OXA-1082/72-82, OXA-32/72-82, OXA-540/72-82, OXA-737/72-82, OXA-544/72-82, OXA-1083/72-82, OXA-1017/72-82, OXA-543/72-82, OXA-226/72-82, OXA-1187/72-82, OXA-539/72-82, OXA-1084/72-82, OXA-1…	STYKYGNKTGW
	OXA-570/74-84, OXA-573/74-84, OXA-1176/74-84, OXA-571/74-84, OXA-444/74-84, OXA-60/74-84, OXA-898/74-84, OXA-57/53-63, OXA-59/53-63, OXA-42/53-63, OXA-43/53-63	STFKYGNKTGW
	RSD2-1/54-64, OXA-129/67-77, OXA-5/67-77, OXA-900/75-85, OXA-550/95-105, OXA-548/95-105, OXA-552/95-105, OXA-549/95-105, OXA-553/100-110, OXA-551/100-110, OXA-1211/70-80, OXA-924/70-80, OXA-1309/70-80, OXA-232/70-80, OXA-1307/70-80, OXA-1201/70-80, OXA-484/70-80, OXA-922/70-80, OXA-833/70-80, OXA-1119/70-80, OXA-181/70-80, OXA-1305/70-80, OXA-1308/70-80, OXA-1226/70-80, OXA-923/70-80, OXA-1207/70…	STFKYGNKTGV
	OXA-824/67-77, OXA-1171/67-77	STFKYGNKTGY
	OXA-11/67-77, OXA-736/67-77	STFKYGKKTGF
	OXA-1147/67-77, OXA-836/67-77, CDD-1/102-112, OXA-1239/59-69, OXA-18/65-75, OXA-45/54-64, OXA-427/51-61, OXA-457/59-69, OXA-243/59-69, OXA-458/59-69, OXA-459/59-69, OXA-787/59-69, OXA-789/59-69, OXA-364/59-69, OXA-513/59-69, OXA-455/59-69, OXA-114n/59-69, OXA-114h/59-69, OXA-839/59-69, OXA-114v/59-69, OXA-114b/59-69, OXA-114d/59-69, OXA-114t/59-69, OXA-114m/59-69, OXA-114f/59-69, OXA-114j/59-69, …	STFKYGSKTGF
	OXA-247/70-80, BAT-1/82-92, BSU-1/81-91, BPU-1/72-82, OXA-919/62-72	STFKYGNKTGT
	OXA-1091/77-86	STFKYGNKTGS
	OXA-1016/62-72, OXA-641/62-72	STFKYGNKSG-
	OXA-372/62-72	STFKYGAKTGW
	OXA-198/67-77, OXA-1186/63-73, OXA-1057/63-73, OXA-1056/63-73	STFKYGVKTGW
	LCR-1/63-73, NPS-1/63-73	STFKYGEKTGW
	OXA-838/72-82	STFKYGHKTGW
	OXA-161/72-82	STFKYGKKTGW
	OXA-541/72-82	STFKYGDKTGW
	lcl|ACU58405.1|CPD-1|/68-78 class D beta-lactamase	STFKYGYKTGW
	OXA-209/74-84	STFKFGNKTGM
	OXA-347/74-84	STFKYRGKTGL
	OXA-1090/71-81	STFKYKNKTGL
	OXA-896/58-68, OXA-9/58-68	STSKYGNKTGW
	OXA-1154/51-61, OXA-504/51-61, OXA-1159/51-61, OXA-1161/51-61, OXA-1163/51-61, OXA-1158/51-61, OXA-1160/51-61, OXA-1155/51-61, OXA-1143/51-61, OXA-1037/51-61, OXA-780/51-61, OXA-1156/51-61, OXA-1041/51-61, OXA-917/51-61, OXA-956/51-61, OXA-912/51-61, OXA-1162/51-61, OXA-1157/51-61, OXA-725/51-61, OXA-959/51-61, OXA-958/51-61, OXA-726/51-61, OXA-950/51-61, OXA-951/51-61, OXA-724/51-61, OXA-12/51-6…	SSFKYGNKSGS
	OXA-790/59-69, OXA-791/59-69	STFKYGNKTGM
	OXA-29/49-59	STFKYGNRTGT
	OXA-140/63-73, OXA-1042/71-81, OXA-31/71-81, OXA-796/71-81, OXA-4/71-81, OXA-224/71-81, OXA-534/71-81, OXA-320/71-81, OXA-33/56-66, OXA-47/71-81, OXA-392/71-81, OXA-921/71-81, OXA-675/71-81	STFKYGNKTGN
		STFKYGNKTGA
